# Supplementary material for: Elevated Rate of Fixation of Endogenous Retroviral Elements in Haplorhini TRIM5 and TRIM22 Genomic Sequences: Impact on Transcriptional Regulation
Source: PLoS One. 2013 Mar 14;8(3):e58532. doi: 10.1371/journal.pone.0058532 (PMC3597737; doi:10.1371/journal.pone.0058532)
Supplement: File S2 — Fasta formatted nucleotide alignment of primate genomic TRIM34 sequences. (FASTA) [file pone.0058532.s007.fasta]

>Homo_sapiens_TRIM34
ACCCTGGCTTTTCTTCACCTCTTCAACCAGGAGCCGAGATTTCTGTTGCTCTGAAGGTGTGTGGGGAGGTTTGT-GGGGG
GTAGAGGGTATGAGACTCCAGGAGAAAAGTTCTCAGTGAAGTTAGGGGAATTTGATTTATGGCCCCAAGTCTCCCCTGCT
CTGTCGGGAGCAAAGGCTAGCTTGCAGGCTTCCTGCTTTGAGTGCACACTGAT------------AGCAGCCTAGAGTCT
GGGGAGGGACAGCCTTGAAAGCAGTGTTAAAGAGGCAGAAGGCCGCCTTTGTTTTCTGGGGTGTCTT-TTTTT-------
CCTCCAGGCTGAATCTATTTCCATTCCCTTCCTATTGTATAATTTTGATTTTCTACCTTGCAAAGGAAAC--AATTCTCT
CTCTCTC---TTTCTCTCTCTC------------------------------------------------------AAAG
AGATGAACAGAAGATCTCTTATTTTCCACCTCCTACTCCCTCCTCAAAAGAGAAGTTGGTGAAAGGAGGTCTCTGTTTTC
CAAGTGTGTGCAGGGCTTAGCTCCTAGTATGTGGCGTCAGATAGAATGGAGCCA---TGGGAGCACGGCCAGGGG-----
TTGAAGTGGGTTCTTTTGCTGCCCTCCTGGCAACCACTAAGGGGCTTTCTGTGGCCATCCTCACGTATTCTTAGTCCTTG
GCCTCCCTGACAATAGCAGGTTGAGTGATGTGACTGCCGCACACCGCTCTGTTCCCTCTGTTCCTATGTCTTTCTGCAGG
TC---TCAGGGCTCTCCTTGCACATCCCTGAACATACCTG----------------------------------------
--------------------------------------------------------------------------------
--------------------------------------------------------------------------------
--------------------------------------------------------------------------------
--------------------------------------------------------------------------------
--------------------------------------------------------------------------------
-----------------------------------------------------TTTACTTTTACTTCAGTAACCCATGTG
CTACCAGCGTCTTCACCTGTCTCAGAACTTGCTCCTCATCATTCTTCCTCTTAGACACACCTTGGCATTGATTTGTAACC
TCAATTTGTTA-TTGCTTTTCTTTGCTCACAATTACTTAACAGAAGTTGTTCATTGTGGGCTCAGAAGGAGCCCACGGAT
TTAATCTTCTTGTT------------------------------------------------------------------
---------------------------------------------------------------------------AAGAA
TTTGATATA-GAGTATGTCCTATCTTAAGCTCACTTGTGAGCAATTTG----CACCTTGATTGATATGTTACAGATATTC
TGACACATGCCATTCTGGCCTCTGCTCTCACCCTTCAGAGTTCACTGTAACTGCCATCCTGTGTCTCTGCCTTACTCCTG
GGTAGAATCCATGTCTGCCTACATACTGACTGTCTCCCAGAGGCGTCTAGTCAGGCACAAGACCCAA-CATATGGGATAA
AATTGATTATAAAGCAGGCTGCTAATGTAAAAACGTGCAATTAGCATCCATTTAACATTCAATAAAT----ATGAAATAT
ACGTGGAAGCCTACATCC-AAATAGAAAGTGATCATAGACCATATCGATGAATGTTAGAGTACACAAGAAGATGACTAAT
ACTATGGAGTAACATCTTC-------------------------------------------------------------
--------------------------------------------------------------------------------
--------------------------------------------------------------------------------
--------------------------------------------------------------------------------
--------------------------------------------------------------------------------
--------------------------------------------------------------------------------
--------------------------------------------------------------------------------
--------------------------------------------------------------------------------
---AAGAAGTTACATTAGGGTAATGACTCTGTAAAGACCTCATGAAGGCCTTG---------------------------
--------------------------------------------------------------------------------
--------------------------------------------------------------------------------
---------------------------------------------------------------------CAACTTTAAAT
AGTTTTTATGAAAGTTTTAAATAGTTTTCATTGTAAGAA---CACATTTGAGTAGAATCTTAAGAAT---GCGAGGAAAT
TAAAGGCTTTAA-TGGTTTTTCCCACGGGCTTAAAAGGAGAACAGTGTGGA------AGATTAAGATGGGAGTGTGCCTG
GAGAGGCATAAAAGGTGAGTTCTTACCAGGCGCGGTGGTTCACGCTTGTAATCCCAGCACTTAGGGAGGACAAGGCAGGA
AGATCACCAGAGATCAGGAGTTCAAGACCAGCCTGGCCAATGTGGTGAAACTGTGTCTCTACTAAAAAAATGCAAAAATT
AGCCGGGTGTGGTGGCGGATGCCTGTAGTCCCAGCTACTCGGGAGGCTGAGGCAGGAGAATCAGTTGAACCCAGGAGGTG
GAGGTTGCAGTGAGCCAAGATCTCGCCATTGTAC--------TCCAGCCTGGGGGAAAAGAGCAAGACTCTGTCTCAAAA
AAAAAAAAAAA--------TATGGTGAGCTCTGAGGATTGAGGCAGTGGGAAGGCATGTGTGATGTGGACCTAACTGGAC
CATTATGAAGTCTGGCCTCGCTCTGGGTGGCATGGGTTTGAACAGGAGAGTGACATGAT---TGACATCT-GCTTTAAGG
TGATCACTCTGTCTACTGATGTAAGAACAGAGATGAGAGCAGAGTGAAGAAGGACAGTGATGGGTGGGCACAGTAGCTCA
CACCTGTAATCCCAGCACTGTGGGAGGCCAAGGCGGGTGGATCACCTGAGGTGGATCATGAGTTTGAGACCAGCCTGGCC
AACATGGTGAAACTCTCTCT--ACTAAAAATACAAAAATTAGCTGGGCGTTGTGGCAGGCACCTGTAATCCCAGCTACTC
GGGAGGCTGAGGCAAGAGAAGCGCTTGAACCCAGCAAGCAGAGGTTGCAGTGAGCCGAGATCATGCCACCACACTCCAAC
CTGGGTAACAAGAGCAAAACTCCGTCTCAAAAAAAAA------------------GGAAGGGCAATGATAGTATCAGCAA
GACTAGTGGAAGAACAATTTCCTGAATTCAGGTGGTTTCTACCAGAGTGGTGGCAGTTGAGGTGGTTGGAAACTAATTTG
AAAAAAAA----------CTCTTTCAGCATATTCTCACGAAGTAACAGACAGAAAAAGAC---ATTAGGGATTGCTTAAT
GAAAATGATTCTATGTTAAAAAATAG--------------CTTTTTGGAGATATATTGACCAGAACACTACAGCTCTTGG
GGAGAGAGTCATTAATGTGGTATAGATTGGGCCCTGGACTCTAAGGAGTAGCTGAAGCAAGAACTCAGTGCACAGAGGAA
TGGGGAGGAGATGCTACAATGTTTCTGAGCTCTCAGGGTCTCTGGATGTCAAAACAGGCTCTACTTTCCTTATTGGCAGT
TTCTGACCAAGAATCCAGAAGAAGTGTCTAGGATATTGTCTAGAAACTTCAAAAGACATCCTCCCC-TAAAAGTCACTCG
TAGAGACACTCTAATTTTACTATCTA-CCTGCAGAGAGACTTA-AAGTTTGCATTATCATATCCAGATGTTAGGAGTCCA
GATGTTAGGAGAAGACTCAAATGAAGGGTATAATCACCTGGCAGCTATGGTAACCAGGTAACCTGGGAGTTCTGTCAGGC
CAATGGCACTCATGTTCCCTTCTCTACCTCCCTGACTGCTGCTG---GGCTTGAGCCACACTGGGAAGTGGTGGGGTCAT
TTCTCACACGTGGGACCGTGGTTACTCTGCACTTTTCTCATTCTTTTGCCATTATGGTGGCAGCAGCTTTGGCATCAACA
TGCATCCTCACTGTGAACATGAAGTCACAGCCCGTGGCAGAATGCATGTTCTACTACTTCCTCTCCTGGAGCCCCCCGGT
ATTTCTAACTATTGGTTGGATACTGATTGGAATAAAAGATAACAAAGAACCCCACATCTGTGGTTGGCTCATG-GCTTTA
GCCATAAACAGGGGTGAATATTATCATATCATATAAACTCCTTGTCTTACTAGTCATCAGATCCTGGTCTGACCAATGGT
CATTGTAGCCAGGGG-CTACCAGTATATCTCTTTTGTATGATTTTTAGTATCTGTACCATTGGCTGGATGACACTCGCCA
GTCAACTTTCAGCTTTTTTTCCTCCTTAAGGTCTTTTGATGGATGGTTAGAGGAGTAGACAGGTCTCGAGGCCTAGGTTT
ATCTCCATACAGCTTTT-ATTGTACCCCATCCTTTTGCCAAGCGTGGGAAAGATTCCTAAGTTGTCACACAT-CACAGAT
CTTTCTTTC----ACTATCAAACCTGTTCAATTATATTAGTTTCCTAGCACTGTTGTAACCAATTATCACAAACTAGATG
ACTTAAAACAACAGGAAT--------------------------TTGTATCACAGCTCAGGAGCCCAGAAGTCCAAAACC
AAGATGGCGGCAAAGTTGATTTTTTTTTTTCAGAAGGCTCTATGTGAAAATCGGTTCTATTCCTCTCTCCTAGCTTCTGG
TGGTTTCTAGCAAACCTCGGCATTCTTTGGCTTATATCTGTGCTATTCCCATCTCTGCCTCTACTGTCACATGGCTTTCT
TTCCCGTGTGTCTGTATGTCTTCTCCTCTT---ATAAAAACACAGGTCAAGGCCGGGTGCAGTGGCTCACACCTGTAATC
CCAGCACTTTGGGAGGCCGAGACAGGTGGATCACCTGAGGTCAGGAGTTCAAGACCAGCATGGCCAACATGGTGAAACCC
CGTCTCTACTAAAAATCTAAAAA-TTAGTTGGGCGTGGTGGCATACACCTGTAATCCCAGCTACTCAGGAGACTGAGGCA
GGAGAATCGCTTGAACCTGGGAGGCGGGGGTTGCAGTGAGCTGAGATTGTACCATTGCATTCCAGCCTGGGCGACAGAGC
-GAAACTCCATCTCAAAAAAAAACAAAAA--CTACAGGTCATTGAATTTAGGGCCTGTCTTTATCCAGTATGACCTCATC
TTAACTTGA------TTACACCTGCAAAGATGTGATTTTCAAATAAGTTCACATTCACATAAGTGAACAA-TTTTTGTGG
AGGGTATAAATCTATCTACTAGAACAAGTATCAAAATGTTACT----GCCTACTGAGAGCCACCCTTTTTCCCTTTGCCT
CACAGTTTCTTGTCTAAACTGACCTCAGGTTCTGAGAATTGGCATTGTATCATCATGCCACTACTCTGTGGTAC-ACCCT
CTGGCTGACCACAAGCAATAATTGCAGGTTTGTTTTGCCATTTGCACTCATGCAGCTTAACTCCACAGGGGGAATACAGG
ACAGGAGATATAGCATGCAGACAGG----GCCGCTTCAGGTGAGCTCTCCGTGAGGATTCTTTTGTTTTGTTTTGTTTTT
TGAGACGGAGTCTCGCTCTGTCGCCCGGGCTGGAGTGCAGTGGTGCGATCTCGGCTCACTGGAAGCTCTGCCTCCCGGGT
TCACGCCATTCTCCTGCCTTAGCCTCCCGAGTAGCTGGGACTACAGGCGCCCGCCGCCACCCCTGGCTAATTTTTGTATT
TTTAGTAGAGATGGGGTTTCACCTTGTTAGCCAGGATGGTCTTGATCTCCTTACCTCGTGATCCGCCTGCCTCGGCCTCC
CAAAGTGCTGAGATTACAGGGGTGAGCCACCGCGCCCGGCCTCAGTGAGGATTCTTACGGTGGTACAAGACCATGTGACC
ATGTGGATGCGTGTGAAACTAACGTAGCTTAGGTAAATCTTACATCAACGGATTGATTCCCTTGTAAAGACCATGAACAT
AGCTTCCAGGGCCCTACAGAGAATATTTTGTTACAAGAGTCTCAATCCTCTTACGGAAAATGAGGTCTGTGCTTACCAAA
A--------------AGAATAAAAATAAAATAATATACCAGGGGATGGTGATGGCGATGTGTTTTTTATAGGAAGAAAGG
ACTT-AAGCCTAATGATAACCTTTTTTTCCCCCACATGTCTAGTCTGACTTCCAATCTTATTTCCTTTACCTTACCCTAC
TTCCCACCCTCATCTGCTTCTCT---------CTGTTAACTTGTCCTGCATCCTCCCATCCCTGCCCCCACCTCCTATTC
ATTGGAAAGAGACTGTCACTTTTACTTCATTTAGGAAGTGTCACATATCCAGGTTCCTCTAGGCTCATGTGAGGCCAAGG
-CCTAGGGCTTTTTGCATATCAGCCACACATTTAAAAACTTTCGAACATGTTATGATGCTATGTCCTCCATGAAC----G
GGGCATTCACTTCCATGATTCCTTCTGCCTAAAATATTTGTTTTCTTTCTCATTCTGTATTCCTTTCTCATTATTCAGCT
TTCATT-AAACTCTTACTTATCCAAGCAAGATATCTTGGATAGTTCTCTATTTAGCACATTATTTGGTCTTCTAAAAACC
TATACCTCTCTATGATGGTGTTTTTT-ACACC-----------------TACCATTTTACATTTTATGAATGATTATATA
ATTAGCTTCTATCTTCTT-AGGTGACTGTTTACTTTATTCTGGCTAATACCATCTGTTCATTACTCAACTTTGGATTTTA
ATCCATTTCCTGAATTTTAATCACGGAAGATAATATGTCTTCAGTGAGAATTTCCAAAATAAACACATGAATAATTGGCA
TTCAATTAGTGGATGTGGATTTAACACAGACAGAA---CTTCATCGCTCCTAAATGTGGTCTCCCTTTATGTATTGGGAC
ATCTCTCTCATGGCCAACAGCCATCTCCTTGCTATTTCTATTCCTCGATGATCTGACATTGGTATGAATCTGTGATCTAT
GTGTAATTCAGCTGGTTACACCCC-TCCCCCAACGAATACACACCTTTGGGTTCCTATCAACCTCTGTAACATCCTT-CA
GGCCAAGAAGAAATC----CTACCATCTACAAACACAAGACCCCCCCAGAAATTCCCAACTTATGTGGTTTCCTCCATTT
CTACACTCTCATAACCCTGGATCCCAATCTACTTCTTTCAGGCTTTACCTCGGCTTTTCTTTGTTTAAATAAGTGGAGTA
GCATGGAGACCTCTGAAAGAGAACTCTGAGGGTATTATGTTCACTCCAATTCTACC-ATCGAATTGGGTGATCTTTGTAA
ATCATTTAATTTTATTTATTCATCTGAA-GAAAGGGAGTACTCTTATTT-------------------------------
--------------------------------------------------------------------------------
--------------------------------------------------------------------------------
--------------------------------------------------------------------------------
--------------------------------CTCAAGAATTTTGGAAGGAGGAACAAACAGGCCAAAGTGATTTTTAAA
TTGTAACTGGTAATGAAATCTCCATATTGTGGTCATTGCTGTTTCTGTCGGTATCTCTGGAAAGTCTGTGAGGGCATGGG
AGGATTTTGTGTGGGTAGATGTGTTAGGAGGCGAGCACTTCTTCACTGGAAACCACATCTGGGGTTCTAAAGTTCAGCTA
TTGAAGAATTTCCAAATAATGGAAGGAAGATAA---TGAAACAAT-----------------------------------
--------------------------------------------------------------------------------
------------------------GATAAA---GTTTT---------------AGTCATCTGTGG-AGAGACAGGGAA-G
TTTTTTT---TATATGTTTATCAAACATTGTGCTTCTCTGTGTTCTAAACACTGAGGCTATAGCAGTAAA----------
------AAGACAAAAGTGCCTAATCTACATGTAGATTATGTTTTAGAAAGAAGAGGTGGACATTTAAAAATAGATAATGA
TAATA---------------------------------------------------------------------------
--------------------------------------------------------------------------------
--------------------------------------------------------------------------------
-----------------------------------------------------------------------AAAGAAAGA
TGGCAAATGTACACTGAATGATGAGTTTGTGGTTGTGCTGTACTTAAGTTTGTCTTAGCAG-CCCTTCTGATGAAGGGAC
ATGTAAGGAGAAAGTTGAAAAAA---GTATAAACGAAAGTCATGCAAATAGCAACAGGATGGTAATTCTAGGCTGAGTAA
TGAACAAGTGCAAAAGCCTTGAGGCATTAACAGCTCGCCCAGACCACTTTCAGCCATTTTTGGTTTCTCTTCCTCATCTT
CTTT-GTTCTTTGATATTGCAGTCTCGGCCAGTCTTTATTGTCTGTGCAATTAGAATGCTTTTTATTTGTACCATTCTTA
TACCATCCCCTTTCAATCTTCTCAGCCATCCAGGGGTCTTTAACCA-GAAGAGAGAGGAGAGCCTCAGGAGTTAGGACCA
GAAGAAGCCAGGGAAGCAGTGCAATGGCTTCAAAAATCTTGCTTAACGTACAAGAGGAGGTGACCTGTCCCATCTGCCTG
GAGCTGTTGACAGAACCCTTGAGTCTAGACTGTGGCCACAGCCTCTGCCGAGCCTGCATCACTGTGAGCAACAAGGAGGC
AGTGACCAGCATGGGAGGAAAAAGCAGCTGTCCTGTGTGTGGTATCAGTTACTCATTTGAACATCTACAGGCTAATCAGC
ATCTGGCCAACATAGTGGAGAGACTCAAGGAGGTCAAGTTGAGCCCAGACAATGGGAAGAAGAGAGATCTCTGTGATCAT
CATGGAGAGAAACTCCTACTCTTCTGTAAGGAGGATAGGAAAGTCATTTGCTGGCTTTGTGAGCGGTCTCAGGAGCACCG
TGGTCACCACACAGTCCTCACGGAGGAAGTATTCAAGGAATGTCAGGTAGGGCCCTAGATGGAGGGAGATGGGGCAGAAG
ATGGTAGTTGGTGGAAAATCTCACCTTTTCATCCTTTTTTTTTTTTTTTTTTTTTT--------GAGACAGAG-TCTCAC
TCTGTCGCCCAGGCTGGAGTGCAGTGGCGTGCTCTCGGCTCACTGCAACCTCTGCCCTCTGAGTTCAAGTAATTTTCCTG
CCTCAGCCTCCCAAGTAGCTCGGATTACAGGCGCCTGCCACCGCGCCTGGCTAATTTTTTTTTTTTTTTTTT--------
------------GGATTTTTAGTAGAGACGGGATTTCACCATCTTGGCCAGGCTGGTCTTGAACTCCTAATCTTGTGATC
CACCCACCTCGGCCTCCCAAAGTGCTGGGATTACAGGTGTGAGCCACCATGCCCGGCCTTTTCTTTCTTTTTTTTTTTTT
TTTTTTGTGAGCAATAAAGCTTTTTAATCACCTGGGTGCAGGCGGACTGAGTCTGAAAAAGGAGTCAGCCCTTTTCATCC
TTCTTTACCCCCTGTGGAACCATAATTCTGAGTCCCGTGATCTTCTCCATGTACATCTTTCACACTGTGCTCAGCTTCCA
ATGCCTGGGGTACACTCTTGTGTATTCCTTTCATTTACATAACAGATGATCCTAGAGTACAGTCTCTTAGCCAAGAATGA
GAAATTTTTGTCTTGTTTTTTCCTTTTTCATTGTATAAGTGATAAATTCCTTCCCAAAGTTAGCTCTCTTGCTTCTCTAA
GCAGGATAATTGCTAAGGAACATTGTGGATTGAATGAGGAAAGAGCATTGATAAGAGGAAAGGACTTTC-----TGCAGG
GTAAATACTTACTCTAAGGAAAGACAGAATCAGGCTACTCCTTTTGA-GGGGTATTGATTTTCATCAC-AATGAATGAAC
AATACATTCATCTCCTCAAAATTTTCCCCATGTCATAGATTCTAATCACCAGCTTCACAGTTTCTGTAAATTGCT-TTTT
TCTGGGATCAACTTGATTTTTTCCCTGTTTGTCCTCTATCCAGATACTAAGAAAGCTTATAGCTTGACTGTAGTGTGATT
CCCTTCTCATAGGAGAAACTCCAGGCAGTCCTCAAGAGGCTGAAGAAGGAAGAGGAGGAAGCTGAGAAGCTGGAAGCTGA
CATCAGAGAAGAGAAAACTTCCTGGAAGGCAAGAGGAGATTCTGAAGGTTTTCTGAGACAGGAATCTTGACAGGACCTTA
ATCCAAGGAGGCCTCGTCCTTTTTATTCCTTGACATTGCATGAGTCCTGAAGCCATTTGATTAGTTCTCTTCTCTGTCCT
GTCCCTGTTGGGGGTGGAGGCTAGAAAGTGGACATGTTACAATT-ACACATACATACCTGGAACTGAGCACAAAGATAGA
CTCTATGATGAGGAAGGCTAGCAAATA-----------------------------------------------CTGTGT
TCCATTGCTCTTTTCCAACGGGGCTCTACTACTTCTGGTGGAAGACACTACATAAAGGACTATGGTTTTCCTCAAGATTC
AAATTAGGAGTGTGGTAAGGCAGGCAGTCATGAATATCCAGGAAAGCTATCTAGAAGCTAAGCCTTAT---GTTTTATAT
TTTGTCTCAGGGTTGGCCTAGATAAGACAGTTTGAGGTCATTGTTTTGGTAGGTACTGAAAGGAAAATAGTAGGAAAAAA
TAGCTTCCCTCCAAGTACCTCTATTG------------------------------------------------------
--------------------------------------------------------------------------------
--------------------------------------------------------------------------------
--------------------------------------------------------------------------------
-----------CTTC----TACTCCCTTGCTGATTTGAACTCCCTGAAAAAAAAAA------TCGATATATAGATAATAC
AAATATATATATA------CAGATA-----------ATATAAATACACACACACACACACACACACACACACACACACAC
ACATATATATATATATATATTTCCCTACTGGCTCCTAATCCCTTGCACAATAGGCC-TTAGCCTGACAAACTTACTACAA
CTCTCTCTTGTCCATCCTTGCAGTATCAGGTACAAACTGAGAGACAAAGGATACAAACAGAATTTGATCAGCTTAGAAGC
ATCCTAAATAATGAGGAGCAGAGAGAGCTGCAAAGATTGGAAGAAGAAGAAAAGAAGACGCTGGATAAGTTTGCAGAGGC
TGAGGATGAGCTAGTTCAGCAGAAGCAGTTGGTGAGAGAGCTCATCTCAGATGTGGAGTGTCGGAGTCAGTGGTCAACAA
TGGAGCTGCTGCAGGTAAGAAGGTTCGCTCAATCTGAGATTCTGGGAACACAGTT---------CCCTCCTGTGTCCTTG
CGTTCTCATCCTGGTGGTGACACTAAGGGGTTTCTTTGGCCTTGCAGTGCCGCCTTGTCGTCCATTCTAGATGTCATGGA
CATGAATGA-------------------------CATTTTTATTAATTTATGAAGTAAGGGAATACATTTTACCTTGCAG
AAAAGATCCATTATATCTAGTTATAGTCTCTAGGCCCCTATTATATGTGATCTAGTGTCAAGCATTCATCAGACTTCTCT
TTACTCTGGTTAGTCACAGGTAAACACAT---GCATTTTCAGGTTTAAGAGCATACACATTTAAGAAATGTGTTCTATTT
AAGTTTAAAATATGCTTATTTGTT--------------------------------------------------------
--------------------------------------------------------------------------------
--------------------------------------------------------------------------------
--------------------------------------------------------------------------------
---------------------------AT-GCAAATGTTCCCTGTTAATTTTTTTTTTTTTTTTTTT------GAGACGG
AGTCTCGCTCTGTCTCCCAGGCTGGAGTGCAGTGGTGCGATCTCGGCTCACTGCAAGCTCCGCCTCCCAGGTTCACGCCA
TTCTCCTGCC-CAGCATCCCGAGTAGCTGGGACTACAGGCACCCACCACCACGTCTGGCTAATTTTTTTTGTATTTTTAG
TAAACATGGGGTTTCACCGTGCTAGCCAGTATGGTATTAATCTCCTGACCTCGTGGTCCGCCTGCCTCGGCCTTCCAAAA
TGCTGGGATTACAGGCCTGACCCACCGCACCCAGCCCCCTGTTACTTTTTTTTAAACATAAAGTGATAGAATATTGAGCC
TTTTGGGGAGAAAGATGGACAAATATATAGACAGACAGTGCTCTCCTTTCTTTGCTGAATTTCCAAATATTTCCTTTTTA
AGATTTGGAACGAAGCAGGAGAGTAACTGATTTTCATTTGTTGAATTGTTTGCTTTGTCTCTGGTGCTTATATCCCAGCT
TTTTTTAAATTCCTTTTTCCTTTTGTCTTCTT-TTTTTGTTTAAATTTAAGATTACTCTGGAACAGAGGTTCCTAAACGT
ATTTTACACTCATTAGTATGGCTATAATAAAAAAA-GATGGACAATACCAAGTGTTTGGGAAGATGTGAAGAAATTGAAA
CCTTCTTGAATTGCTAGTAGAGATGTAAAATA--GTAAAGCTACTTAGGAAAAACTGCTTGGCAGTTGCTCAGAAATGTA
AAGAGAGTTCTCA-TGTGGCCTAGCCATTCCATTCCTACCTATATACCTAGAAGAACTGAATACATATATTTGTGCATAA
ACTTATATATGAAAGTTCACAGCAGTATTGTTCATAAATAAAA-CAACTCGTATCTCCTTAAACTGATGATTGGATAAGC
AAAATGTGTTATATCCAAACAATGTAATATTGTTTAGCTGTGAAAAATAATGAATTAATAATACATGCTATGACATGGAT
GCACCTTGAAAACATTAT---AATTGAAAGAAGGCAAACACAA-GTTCTTTTTTGTATGATTCCATTTATATGAA-----
-----AGTCTGTAAGTAGCAAATCCGTAATATAGAAACTAGATTAGTGGTTGCCAGAGCTCTGGGGAAGAAT----AGGA
AGTAATTGCTAATTAGTGTACAATTTCTATTTGTAGTGATGAAAATGATCTGGA-TTTACTGTGCAATGACGGTTGCACT
ACATCGTGAATATTTTAAAGCCTGTTA-----------------------------------------------------
--------------------------------------------------------------------------------
--------------------------------------------------------------------------------
--------------------------------------------------------------------------------
------AATTGTGCACTGTAAAGGGCAAATCTT-ATGGTATTTGAACTACATCTCAGTAAAAACAAAAACAAAAAGGTTC
CGTAGGCCCTTTTTTATGGTTCTTCCTTAAGCTCTTCACAACCCTTTGAATCGCCACCTTCACAAAAGAACACTGTGTTT
ATGTCATTTGTCCAGGCATTTGTCCTATTTCAGTCAGTCTTAGTTGCTAT-TTGGTCACTTGGAATTTAAAAAAATATTG
GTAGATCAAAAATTATAAATGCTGTGGGATTAACATTTCACTTCTAGATGTTAGCTTCAAAGAATGGCAAATGGAAAACT
TAGGAACTTATTCTTTTATCTGAGTAGGGACTTTGGCTATTCCTCTCCAATATGTTAAGATATAATCTGTTGGCGGGGCG
CGGTGGCTCACGCCTGTAATCCCAGCACTTTGGGAGGCCGAGGTGGGTGGATCACGAGGTCAGGAGATCGAGATCATCCT
GGCTAACACAGTGAAACCCCGTCTCTACTAAAAA-TACAAAAAATTAGCCGGGCATTTTATAATATACAAAAAATTAGCT
GGTGATGGCGGC--TGCCTGTAGTCCCAGCTACTCAGGAGGCTGAGGCAGGAGAATGGTGTGAACCCAGGAGGCGGAGCT
TGCAGTGAGCCAAGATGGCGCCACTGCACTCCAGCCTGGGCGACAGAGCGAGACTCAGTCTAAAAAAAAAA---------
-------GATATGTGCTGTTGTATTTGTGGTATGTCTCCTCCACAATCCCATCTCCTGAGAGTCCCTGTAACAGCTTTCT
TTCTATATGGATTCTCATGATGGCGATCGGGATGGATGGTGTTATCATATATCCATTGTTTGTTTGCTAGAGGGACTGAT
ACTC----------------------------------------------------------------------------
--------------------------------------------------------------------------------
--------------------------------------------------------------------------------
------------------------------------------------------------------------ATTTCGTA
AGAGCTGCATTCAACACTTACTGCCAAAGAACGATCTAGACAGAAAGACGCTCAACTTGAAAACTGATGCAAAAATTAGA
TGAGATTTTAGGTTGTTTCCCTTATAAAGGAGATACTTTGATTTTTAATGCTTTCTGTAATAGTTTTATTATATTTGGCC
ATTTTTATTTTTGAAAGGATGGAATGGTAGGTAGCTAAATGAGGGAAAGAAGATGGCAGTTACTATTATTT--AAAATTT
TTTTT-CCAGGTTTCTT---------------------------------------------------------------
--------------------------------------------------------------------------------
--------------------------------------------------------------------------------
--------------------------------------------------------------------------------
--------------------------------------------------------------------------------
--------------------------------------------------------------------------------
--------------------------------------------------------------------------------
---------------------------------------------------------------AAAATTTTAGATTCAGG
GGGCACATTCAATTCCATGGCATTTAGTACATTCAGATTGCTGTGCAACCATTAAGTGGGATCCCTCTCTGGACTTTTTC
ACCATCCCAAACTGAAACTGTACCCATTAAAAAACAGCTCCCCATTCCCTTTGGTCACCACTGCTCTACTTTGATAACCA
CTATTCTACTTTCTGTCTCTATGACTTTGCCTATTCTAAGTACCTCATGTAAGTGGAATCATAGAATATTTGTCCTACAG
GTTTCTTATAAGGGTCTGTTGCATAATGCTAGGGTTTGGGCTACATGGTACTCATTATTTTTGTTTCGTCAATATCCATT
CCCCATTTTTCTGGTAATAACACCTGGAATTACTCTTGCAAGAAAGACTAGCATGTCTATTTCCATCCTTGTACTTGTTT
AGACCTGAGAAAATCAGCACTATCAAGAATGAATGAGTTAATTATATGTAAATCAGCGTATCCAATCCTTACATCCCTAC
CAGCCACACA----------------------------------------------------------------------
--------------------------------------------------------------------------------
--------------------------------------------------------------------------------
--------------------------------------------------------------------------------
-------------------GTGATTATTTTAAGTTGGACATCTGACCCAATCCTGAATGCTTGTGGGTGACAAAATTGTA
CTGTCATTGCAGTGAAGGGAAGTTCTCCTTTTTAGCAGAAAATAATATCAGTGAAGATAATTCAAATAAAGAGATTCAAG
TTGCTATCAACTAAAATCTGAGAATACAGTCAAAATATAGGGAAGAAATGAGAATTAATAGGCACAGAGAGGCCAGAATT
GTGACAGAGGTTTGAGCTTCCAGAGCCATCTGTGACTAAAGTAATACCTCTCTGGCCACAACCCTTACTTTCTTCCCAGT
TAAGGCAATTTTAGTTGTTGAACAACAAAACTATGCTAATACAGAGAGCAAAACCATTTATTTGGTTGTACACCAGCTGG
TGTCATGAAAGAGTTAAAGCCAAATATATTGGTACATCTTGCTCAAAACAAATTAACCCACAGTGGTGATGATGGGGGAA
TGCAGATGACTAACAGAAGTTAAGGATGGACTGGCTTGATAAAATGTTTTAGTGTCTGGGACAGGGACTGAGTGAATATT
GATACCAGTTTGACAATACGGCATAAGAAAGGAAACAATATGGCTGGAGAACAGCTTATGTTTTAGATATTCTTAGTTAC
TGGTGCC-GTTTTTTCTTCTTTGTGGAATGTAGTATTGTACCTGTACAGAATGAAGTCTAGCTGCTTTTTTTCAC---AG
TCCAATGAGATGCAGACAGACTTGGAAAAGAAGGGAGTTTATTTTTGCAACTGGTTACAGGGAGAAGGTCAGAGTAACT-
ATCAGACCAACTCAGAGTTACAAAGTTTTTTTTTTCTGGTGCTTATATACATTTTAAGCTCTATGCCTTCACGTGGGAGT
GCACCTACATGCAGGAGTGTTTCA----ATCTATATCTATCTTTAACTAGGGTCTGGGGTCTAGAAAGCTTTCTCTAGAG
TCTTGGAAAGTTTCTTAATCTTAAATGGGCCCTGGTACAAGTTGTATGTCTAAGAATGCTTTTATTATTCGATCAGACTT
TAAGGTATGAGAAAACCCAGGCAGGGTCTTTAAAGGGTTTGTTTTCACATTTCAGCCCTGGTACTCACTCAGGCACCAGC
TTTTCCAGTTCTTTAATGTTTAACTTACGCATTCATCAAAATTATAGTAAAGGGTTAAGGGAAACTGATTGTTCTGGTTG
CTAATGGAAACCTGACCTGCCACAGTATTATAGAAACATGATTACAGACAAAAGACAATGATTAGATAT--AAAGGTTGA
CAAAAAA-CAGCACCTATGTGTGAGCTAAAATTAAGATTGGAGGCCAGGCGCGGTGGCTCACACCTGTAATCCCAGCACT
TTGGGAGACCGAAGAGGGCGGATCATGAGGTCAGGAGATCAAGACCATCTTGGCTAACACAGTGAAACCCCGTCTCTACT
AAAAATATTAAAAA-TTAGCCGGGCATGGTGGCACGTACCTGTAGTCCCAGGTACTTGGGAGGCTGAGGCAGAAGAATCG
CTTGAACCGGGGAGGTGGAGGTTGCAGCGAGCCAAGTTCGCACCACTGCACTCCAGCCTGGGTGACAGAGTGAGACTCTA
TTTCAAAAAAAAAAAAAAAAAAAAAAAAAAAAGATTGGAAGAGGTTGCCTATAGGCGGTGGATAGAACAGGACTTTTCTG
ACTGTACATAAGACTATGTCATCTGTAAAAAGAGAGAGATTTACTATTTTCTTTCCAATATAGAAGCTTTTTTAAAAATT
AGTTTTTATTGGTACTTAATAAGTATACATATTTATAGGGTACATAGATTTTGGCACAGGT--ATACAATGCATAATAAT
TACATCAGTACATCAGAGTAAATGATGTAT--CCATCACCTCAAGCATTTATCATTTGTTTGTGTTGCCAACATTCAGAT
TATACTATTTTAATTATTTTAAATGCATAATAAATTATTGTTGACTATAGTCACACTGTTGTGGTATCAAATACTAAATC
TTATTCATTCTATCTAACTGCCAACATAGAGCCTTTTATTTGTTTTCTGTGACTAACTGCCCTGACTAGAACCTCCAATA
CCATGTTAAATAGAAGTAGTGAGAGCAAACATCCTTGTCTTTTCTGATCTTCGGGAAAAAGCATTCAGTTTTTCACCACA
AAGTATGATGTTAGCTGTAGGTTTTTCATAGATGTGTTTTATCAGGCTGAGGGACCTCTCTTCTATTCCAAGTTTGTTAC
CATTCCTGTTTT---GTTTTGTTTTTTTT-ATGAAAGTGTGCTGAATTTTGCTGAATGCTTTTTTT--CATGTCTATTGA
GATCATCATGTGGTTTTCATCCTTTATTTTATTAATATGGTATATTACATCAATTGATTTTTTTTT-ATGTTGAACCAAC
CTTGCATTTCTGGGATAAATTCTACTTGGCCATCAGGTATAATCTTTTTGCTGGATTGCCAGATTTGATTTTCTTGTATT
TTTGTTGAAGAATTTTGTATTTATATTTATAAGAGATATTGGTCTATGGTTTTCTTTTCTTGTGATGTCTTTGGTTCTTT
TATCAGGG-TCCTTTATCAGGGTAGGATGAGCCTCATGTAATCAATTAGGAAGTGTTCCCTGCTCTTCTTTATTTTTGAA
ATAACTTATGAAGTTTTGATATTATTTCTTTTTAAACCTTTAGCAGAATTAGCCAGTGAAGCCATCTGGGTGAGGCCTTT
TCTCTGTAGGAAGTCTTTGAATTCCAACTTAATCTCTTAACATGTTTTAGGCCTATTCATATTTTCTATGCGTTCTTTAA
TGTGTATTGATAGTTTCTGTATTTCTAGGAATTTGTCTGTTTCATTAAGATTATCTAATTTGTTGGCATACAGTTGCTCA
T----TTTATAATCCTTTTAATTTCCTTAAGGTCAGTAGTAATATCCCATCTTTCATTCCTGATTTTTTTT--CTTGGTG
TGTCTAGCTAAATGTTTGCCAATTTTGTTGACATTTTCATATAACTCACTTCTGATTTTTCCATTTTTTTTC-CTACTGT
TCTTCTTTCTTTCATTAGTCTTACACCAGTCTTTATACACTTTGACTCATGTTTTCTCTTTTCTTTCTAGGACATGAGTG
GAATCATGAAATGGTGCGTATGGGTGGCCAGGAGTGGTGCTTGTGAGTTATAAAGAAGTGTTTGTAGCTATTAGAGTTAT
TTGGTGGTCAATTGGAATAAAAAA-TCTCCCAGAGTAGTAAAATTTGGATGTATCGTTATCTTAAATTGCTGGTCCCCGA
TGAGTATTTGAGTGTTCCGTAAC---TATTAATGGACTCGATCCTATGTTAGTAAATTCAGTGGTTGAAGTTCAGAGCTA
CAGCCAAAAAGGATATTAAGGATGAGAGCTTTTACTGTCAGACTTCGGTGACTTCACTCATTTAATTCATCCTCTGTCCC
TGCATCCAGCCCTGGATCTTTTATTTTATATGTGTTTGTCATA-CACATGGAGGGCCTTGTCAAATCCTAAAATAGGGCA
TGGAGACAGCTTCTTTATATGTACTTTGCTTACTTAGAAATAGAAGGTACCGGATCATTATGCAAGGTT-----------
--------------------------------------------------------------------------------
--------------------------------------------------------------------------------
--------------------------------------------------------------------------------
--------------------------------------------------------------------------------
--------------------------------------------------------------------------------
--------------------------------------------------------------------------------
--------------------------------------------------------------------------------
--------------------------------------------------------------------------------
--------------------------------------------------------------------------------
-----------------------------------------------------CTCTTTAGATTTCCAAAAGTAGACTCG
AGCCTCAGGACGGTAGCTGTGACTCTGGTGATGATAATTAATCTCTGCCAGTTCACACACTTTAGAAGCTCCTATGGAAA
AGTGTAGTCCTTGTTCCTTGTGTCTACCATTGCCAACCCACTTGGAAACATCAAGTTTCTTACAAAGACATAAAATTCTA
ACCATTTTTAGTTAGGTTGTCATAACTTCTCCTTTGCCGAGTGTTCGTGTTTCCCAG-GAATCTGAAATCTCAAATATGC
GCCATTCCACTGGAGTTCAGGCTTTGAACTCGGGCACAGGCTGACAGGATTTCCCTACAGAGCCCCGTATCACAGTCAGG
ATCTACAGCT----------------CAGAATACCACATCTCTGGCCCCTCCCAGAAGGCCCACTGAGATGCAGTGAGTT
TTCCACATATCACATACCATTTCTACAGGTAGCAAAGTCTTTTCCTATC----GTTTTATCCAATTTTTTATTATTTCCA
TTAGATATCAAAGGAGGGTTTAATTATTTCATTTTT--AAGGAAGAAACTGTGCTTTCAAGAAATGAAGACCTTCTCAAG
GTCACCCAGAGGATAAGAGGGAAAGTAGACACAGTCACATTTCTTCTGGATCCAGGGTCCGGCTCTCCCTTCTCCCCCTC
CTCAGGCTCAGGGAGAAGGGTTCAAGTGCATCAGTGATGTGAAGGAGATGAAACCAGTGATGTGGGAGGGATGGACACAG
GATGAGAGATGTGGGGGTCAAAAAATTTTTTTCATCCCTAGGAGTGAGATCTGGAGGCTGAAAAAGCCAAAAATGGTTTC
CAAGAAACTGAAGACTGTATTCCATGCTCCAGATCTGAGTAGGATGCTGCAAATGTTTAGAGGTGAGGAGAAGCAGACAA
AGACTGTGGATGTGGGATTGTTGTGGTGTCAGGTAATAAACTGTCTAGGTGGGATAACTTAAAATTGAGGACAGAAGAGA
GGAGGGAGGTCAGAGAATAAGGAATATTCTGTGGTGAAGAGGATGCATTTATATGTAAGGAAAAATGGCTAGGTCTCTGG
TTTATCTTTTTAATTCACTAGCTCACAGCTTCATGGTATTCCCTTCCCCTGTCCCTACTCTAAAGAATATATAGGTATCA
GTGCTTACTCCTTTGTTTCTAATCAGCATCACTGAATCTTTTATTATTTCAGAACTGACAGCTGTCCGGTGCTACTGGGG
TAAGAAAAAGTTA--GTCTTTAAATAACTGTTTTCCAATTACCTTTCAGAAGTTTATGG-------TTTCAATGATATCT
TCTGATCTTAGCCTCATGCATTCTCAGCACCTCCCAAAACATTTGCTAAATACATTTCTCCAGTGTTTTACCCC-TCC--
-AATT-CATCAGTGCAAGTTTTTCAGTCACTTCCCAAGTTCGTTCATCACCATGTCACTAGATAAACCTACTCCAT-ATC
TGTCACCTAATCATATATATCACACAGATGATTATATTCATATACATATATA-TATATT---------------------
--------------TTTTTTTTTCTTGCAGTGGATGTCACACTGAATTCAGTCAACCTAAATTTGAATCTTGTCCTTTCA
GAAGATCAGAGACAAGTGATATCTGTGCCAATTTGGCCTTTTCAGTGTTATAATTATGGTGTCTTGGGATCCCAATATTT
CTCCTCTGGGAAACATTACTGGGAAGTGGACGTGTCCAAGAAAACTGCCTGGATCCTGGGGGTATACTGTAGAACATATT
CCCGCCATATGAAGTATGTTGTTAGAAGATGTGCAAATCGTCAAAATCTTTACACCAAATACAGACCTCTATTTGGCTAC
TGGGTTATAGGGTTACAGAATAAATGTAAGTATGGTGTCTTTGAAGAGTCTTTGTCCTCTGATCCCGAGGTTTTGACTCT
CTCCATGGCTGTGCCTCCCTGCCGTGTTGGGGTTTTCCTCGACTATGAAGCAGGCATTGTCTCATTTTTCAATGTCACAA
GCCATGGCTCCCTCATTTACAAGTTCTCTAAATGTTGCTTTTCTCAGCCTGTTTATCCATATTTCAATCCTTGGAACTGT
CCAGCTCCCATGACTCTATGCCCACCAAGCTCTTGAATTTTCTCATTTCTTCACCTACAACCCTTTGTCTTGACTTATCT
CCTGCAACTGACTCATCTGCAACATTCACACCATTGCTTCCTTGTGGTTTCCCTTC-----TTTAGAACTTTTACTCATC
CTTGAGATGTATGGTGTATTTGGCTTGAGTTATGAGAGATGCTTATTTATTCATTTACTCTTTTTCATATTTTCAGAGAA
AGTTACCTAATCCCTCCTAAAGACACAGCAGTATGGGTATAACATCCTTGCCTTCCCATTTATCCATGTTTCACTTTATC
ACTGATATGAAGAGGCCCAAAGCCTGTTAGCCACCATCCATGCTACCTAGGTAGTCCATAGGAACCACCCCCATGACCAC
CACCAACATCAACTAAAGGTTCTTGGAGGGTATGTCAGTGTGTTGCTCAGGATACCCCAGGTACATCAAGGAATCAAGGA
GAGGAAAATATGAGCAATATGTGTATTCAGAGTGAAGATTTTATGTCCAGAGTATTTGAGCTCAAACCTTGCCTGTTGTT
TTCTAATCATGATGAATACTTTCTCAGTTTCTTTTTCCTGAAATATAAATTGGGATTTAAG-------------------
---------------------------------ACTGTACCTAACTATTAAGATCACTGTGTAAAACTAAGTGTCTCTAA
ATGTAATGCATCGATTTAGTGTCTGGAACATAATAAATATTTGCTCTCATGATTGCTAAAAA
>Pan_troglodytes_TRIM34
ACCCTGGCTTTTCTTCACCTCTTCAACCAGGAGCCGAGATTTCTGTTGCTCTGAAGGTGTGTGGGGAGGTTTGT-GGGGG
GTAGAGGGTATGAGACTCCAGGAGAAAAGTTCTCAATGAAGTTAGGGGAATTTGATTTATGGCCCCAAGTCTCCCCTGCT
CTGTCGGGAGCAAAGGCTAGCTTGCAGGCTTCCTGCTTTGAGTGCACACTGAT------------AGCAGCCTAGAGTCT
GGGGAGGGACAGCCTTGAAAGCAGTGTTAAAGAGGCAGAAGGCCGCCTTTGTTTTCTGGGGTGTCTT-TTTTT-------
CCTCCAGGCTGAATCTATTTCCATTCCCTTCCTATTGTATAATTTTGATTTTCTACCTTGCAAAGGAAAC--AATTCTCT
CTCTCTC---TTTCTCTCTCTC------------------------------------------------------AAAG
AGATGAACAGAAGATCTCTTATTTTCCACCTCCTACTCCCTCCTCAAAAGAGAAGTTGGTGAAAGGAGGTCTCTGTTTTC
CAAGCGTGTGCAGGGCTTAGCTCCTAGTATGTGGCATCAGATAGAATGGAGCCA---TGGGAGCATGGCCAGGGG-----
TTGAAGCGGGTTCTTTTGCTGCCCTCCTGGCAACCACTAAGGGGCTCTCTGTGGCCATCCTCACGTATTCTTAGTCCTTG
GCCTCCCTAACAATAGCAGGTTGAGTGATCTGACTGCTGCACACCGCTCTGTTCCCTCTTATCCTATGTCTTTCTGCAGG
TCGTCTCAGGGTTCTCCTTGCACATCCCTGAACATACCTG----------------------------------------
--------------------------------------------------------------------------------
--------------------------------------------------------------------------------
--------------------------------------------------------------------------------
--------------------------------------------------------------------------------
--------------------------------------------------------------------------------
-----------------------------------------------------------TTTACTTCAGTAACCCATGTG
CCACCAGCGTCTTCACCTGTCTCAGAACTTGCTCCTCATCATTCTTCCTCTTAGACACGCCTTGGCATTGATTTGTAACC
TCAATTTGTTA-TTGCTTTTCTTTGCTTACAATTACTTAACAGAAGTTGTTCATTGTGGGCTCAGAAGGAGCCCACAGAT
TTCATCTTCTTGTT------------------------------------------------------------------
---------------------------------------------------------------------------AAGAA
TTTGACATA-GAGTATGTCCTATCTTAAGCTCACTTGTGAGCAATTTG----CACCTTGATTGATATGTTACAGATATTC
TGACACATGCCATTCTGGCCTCTGCTGTCACCCTTCAGAGTTCACTGTAACTGCCATCCTGTGTCTCTGCCTTACTCCTG
GGTAGAATCCATGTCTGCCTACATACTGACTGTCTCCCAGAGGCATCTAGTCAGGCACAAGACCCAA-CATATGGGATAA
AATTGATTATAAAGCAGGCTGCTAATATAAAAATGTGCAATTAGCATCCATTTAACATTCAATAAAT----ATGAAATAT
ACATGGAAGCCTACATCCTAAATAGAAAGTCATCATAGAACATATCAATGAATGTTAGAGTACACAAGAAGATGACTAAT
ACTATGGAGTAACATCTTC-------------------------------------------------------------
--------------------------------------------------------------------------------
--------------------------------------------------------------------------------
--------------------------------------------------------------------------------
--------------------------------------------------------------------------------
--------------------------------------------------------------------------------
--------------------------------------------------------------------------------
--------------------------------------------------------------------------------
---AAGAAGTTACATCAGGGTAATGACTCTGTAAAGACCTCATGAAGGCCTTG---------------------------
--------------------------------------------------------------------------------
--------------------------------------------------------------------------------
---------------------------------------------------------------------CAACTTTGAAT
AGTTTTTATGAAAGTTTTAAATAGTTTTCATTGTAAGAA---CACATTTGAGTAGAATCTTAAGAAT---GCGAGGAAAT
TAAAGGCTTTAA-TGGTTTTTCCCATGGGCTTAAAAGGAGAACAGTGTGGA------AGATTAAGATGGGAGTGTGCCTG
GAGAGGAATAAAAGGTGAGCTCTGACCAGGCGCGGTGGTTCACGCTCGTAATCCCAGCACTTAGGGAGGACA-GGCGGGA
GGATCACCAGAGATCAGGAGTTCAAGACCAGCCTGGCCAATGTGGTGAAACTGTGTCTCTACTAAAAAAATGCAAAAATT
AGCCGGGTGTGGTGGCGGACGCCTGTAGTCCCAGCTACTCGGGAGGCTGAGGCAGGAGAATCAGTTGAACCCAGGAGGTG
GAGGTTGCAGTGAGCCAAGATCTCGCCATTGTAC--------TCCAGCCTGGGGGAAAAGAGCAAGACTCTGTCTCAAAA
AAAAAAAAAAAAAAAAAAAAATGGTGAGCTCTGAGGATTGAGGCAGTGGGAAGGCATGTGTGATGTGGACCTAACTGGAC
CATTATGAAGTCTGGCCTCGCTCTGGGTAGCATGGGTTTGAATAGGAGAGTGACATGAT---TGACATCT-GCTTTAAGG
TGATCACTCTGTCTACTGATGTAAGAACAGAGATGAGAGCAGAGTGAAGAAGGACAATGATGGGTGGGCACAGTAGCTCA
CACCTATAATCCCAGCACTGTGGGAGGCCAAGGCGGGTGGATCACCTGAGGTGGATCATGAGTTTGAGACCAGCCTGGCC
AACAAGGTGAAACTCTCTCT--ACTAAAAATACAAAAATTAGCTGGGCATTGTGGCAGGCACCTGTAATCCCAGCTACTC
GGGAGGCTGAGGCAAGAGAAGCGCTTGAACCCAGCAAGCAGAGGTTGCAGTGAGCCGAGATCATGCCACCACACTCCAAC
CTGGGTAACAAGAGCAAAACTCCGTCTCAAAAAAAAAA-----------------GGAAGGGCAATGATAGTATCGGCAA
GACTAGTGGAAAAACAATTTCCTGAATTCAGGTGGTTTCTACCAGAGTGGTTGCAGTTGAGGTGGTTGGAAACTAATTTG
AAAAAAAT----------CTCTTTCAGCATATTCTCATGAAGTAACAGACAGAAAAAGAC---ATTAGGGATTGCTTAAT
GAAAATGATTCTATGTTAAAAAATAA--------------CTTTTTGGAGATATATTGACCAGAACACTACAGCTCTTGG
GGAGAGAGTCATTAATGTGGTATAGATTGGGCCCTGGACTCTAAGGAGTAGCTGAAGCAAGAACTCAGTGCACAGAGGAA
TGGGGAGGAGATGTTACAATGTTTCTGAGCTCTCAGGGCCTCTGGATGTCAGAACAGGCTCTACTTTCCTTATTGGCAGT
TTCTGACCAAGAATCCAGAAGAAGTGTCTAGGACATTGTCTAGAAACTTCAAAAGACATCCTTCCC-TAAAAGTCACTCC
TAGAGACACTCTAATTTTACTATCTA-CCTGCAGAGAGACTTA-AAGTTTGCATTATCATATCCAGATGTTAGGAGTCCA
GATGTTAGGAGAAGACTCAAATGAAGGGTATAATCACCTGGCAGCTATGGTAACCAGGTAACCTGGGAGTTCTGTCAGGC
CAATGGCACTCATGTTCCCTTCTCTACCTCCCTGACTGCTGCTG---GGCTTGAGCCACACTGGGAAGTGGTGGGGTCAT
TTCTCACACGTGGGACCGTGGTTACTCTGCACTTTTCTCATTCTTTTGCCATTATGGTGGCAGCAGCTTTGGCATCAACA
TGCATCCTCACTGTGAACATGAAGTCACAGCCCGTGGCAGAATGCATGTTCTACTACTTCCTCTCCTGGAGCCCCCCAGT
ATTTCTAACTATTGGTTGGATACTGATTGGAATAAAAGATAACAAAGAACCCCACCTCTGTGGTTGGCTCATG-GCTTTA
GCCATAAACAGGGGTGAATATTATCATATCACATAAACTCCTTGTCTTACTAGTCATCAGATCCTGGTCTGACCAACGGT
CATGGTAGCCAGGGG-CTACCAGTATATCTCTTTTGTATGATTTTTAGTATCTGTACCATTGGCTGGATGACACTCGCCA
GCCAACTTTCAGCTTTTTTTCCTCCTTAAGGTCTTTTGATGGATGGTTAGAGGAGTAGACAGGTCTCGAGGCCTAGGTTT
ATCTCCATACAGCTTTT-ATTGTACCCCATCCTTTTGCCAAGCGTGGGAAAGATTCCTAGGTTGTCACACAT-CACAGAT
CTTTCTTTC----ACTATCAAACCTGTTCAATTATATTAGTTTCCTAGCACTGTTGTAACCAATTATCACAAACTAGATG
ACTTAAAACAACAGGAAT--------------------------TTGTATCACAGCTCAGGAGCCCAGAAGTCCAAAACC
AAGATGGCGGCAAACTTGATTTTTTTT---CAGAAGGCTCTATGTGAAAATCGGTTCTATTCCTCTCTCCTAGCTTCTGG
TGGTTTCTAGCAAACCTCGGCATTCTTTGGCTTATATCTGTGCTATTCCCATCTCTGCCTCTATTGTCACATGGCTTTCT
TTCCCGTGTGTCTGTATGTCTTCTCCTCTT---ATAAAAACACAGGTCAAGGCCGGGTGCAGTGGCTCACACCTGTAATC
CCGGCACTTTGGGAGGCCGAGACAGGTGGATCA--TGAGGTCAGGAGTTCAAGACCAGCCTGGCCAACATGGTGAAACCC
CGTCTCTACTAAAAATCTAAAAA-TTAGTTGGGCGTGGTGGCATACACCTGTAATCCCAGCTACTCAGGAGACTGAGGCA
GGAGAATCACTTGAACCTGGGAGGCGGGGGTTGCAGTGAGCTGAGATTGTACCATTGCACTCCAGCCTGCGCGACAGAGC
-GAAACTCCATCTCAAAAAAANNNNNNNNNNNNNNNNNNNNNNNNNNNNNNNNNNNNNNNNNNNNNNNNNNNNNNNNNNN
NNNNNNNNNNNNNNNNNNNNNNNNNNNNNNNNNNNNNNNNNNNNNNNNNNNNNNNNNNNNNNNNNNNNNNNNNNNNNNNN
NNNNNNNNNNNNNNNNNNNNNNNNNNNNNNNNNNNNNNNNNNNNNNNNNNNNNNNNNNNNNNNNNNNNNNNNNNNNNNNN
NNNNNNNNNNNNNNNNNNNNNNNNNNNNNNNNNNNNNNNNNNNNNNNNNNNNNNNNNNNNNNNNNNNNNNNNNNNNNNNN
NNNNNNNNNNNNNNNNNNNNNNNNNNNNNNNNNNNNNNNNNNNNNNNNNNNNNNNNNNNNNNNNNNNNNNNNNNNNNNNN
NNNNNNNNNNNNNNNNNNNNNNNNNNNNNNNNNNNNNNNNNNNNNNNNNNNNNNNNNNNNNNNNNNNNNNNNNNNNNNNN
NNNNNNNNNNNNNNNNNNNNNNNNNNNNNNNNNNNNNNNNNNNNNNNNNNNNNNNNNNNNNNNNNNNNNNNNNNNNNNNN
NNNNNNNNNNNNNNNNNNNNNNNNNNNNNNNNNNNNNNNNNNNNNNNNNNNNNNNNNNNNNNNNNNNNNNNNNNNNNNNN
NNNNNNNNNNNNNNNNNNNNNNNNNNNNNNNNNNNNNNNNNNTGATCTCCTGACCTCGTGATCCGCCTGCCTCGGCCTCC
CAAAGTGCTGAGATTACAGGCGTCAGCCACCGCGCCCGGCCTCAGTGAGGATACTTACGGTGGTACAAGACCATGTGACC
ATGTGGATGTGTGTGAAACTAACGTAGCTTAGGTAAATCTTACATCAACCGATTGATTCCCTTGTAAAGACCATGAACAC
AGCTTCCAGGGCCCTACAGAGAATATTTTGTTACAAGAGTCTCAATCCTCTTACGGAAAATGAGGTCTGTGCTTACCAAA
A--------------ATAATAAAAATAAAATAATATACCAGGGGATGGTGATGGCGATGTGTTTTTTATAGGAAGAAAGG
ACTT-AAGCCTAATGATAACCTTTTTTTCCCCCTCATGTCTAGTCTGACTTCCAATCTTATTTCCTTTACCTTACCCTAC
TTCCCACCCTCATCTGCTTCTCT-----------GTTAACTTGTCCTGCATCCTCCCATCGCTGCCCCCACCTCCTATTC
ATTGGAAAGAGACTGTCACTTTTACTTCATTTAGGAAGTGTCACATATCCAGGTTCCTCTAGGCTCATGTGAGGCCAAGG
-CCTAGGGCTTTTTGCATACCAGCCACACATTTTAAAACTTTCGAACATGTTATGATGCTATGTCCTCCATGAAC----G
GGGCATTCACTTACATGATTCCTTCTGCCTAAAATATTTGTTTTCTTTCTCATTCTGTATTCCTTTCTCATTATTCAGCT
TTCATT-AAACTCTTACTTATCCAAGCAAGATATCTTGGATAGTTCTCTATTTAGCACGTTATTTGATCTTCTAAAAACC
TATACCTCTCTATGATGGTGTTTTTT-ACACC-----------------TACCATTTTACATTTTATGAATGATTATATA
ATTAGCTTCTATCTTCTTTAGGTGACTGTTTACTTTATTCTGGCTAATACCATCTGTTCAT-ACTCAACTTTGGATTTTA
ATCCATTTCCTGAATTTTAATCACGGAAGATAATATGTCTTCAGTGAGAATTTCCAAAATAAACACATGAATAATTAGCA
TTCAATTAGTGGATGTGGATTTAACACAGACAGAA---CTTCATCGCTCCTAAATGTGGTCTCCCCTTATGTATTGGGAC
ATCTCTCTCATGGCCAACAGCCATCTCCTTGGTATTTCTATTCCTCGATGATCTGACATTGGTATGAATCTGTGATCTAT
GTGTAATTCAGCTGGTTACACCCC-TCCCCCAACAAATACACACCTTTGGGTTCCTATCAACCTCTGTAACATCCTT-CA
GGCCAAGAAGAAATC----CTACCATCTACAAACACAAGACCCCCC-AGAAATTCCCAACTTATGTGGTTTCCTCCATTT
CTACACTCTCATAACCCTGGATCCCAATCTACTTCTTTCAGGCTTTACCTTGGCTTTTCTTTGTTTAAATAAGTGGAGTA
GCATGGAGACCTGTGAAAGAGAACTCTGAGGGTATTAGGTTCACTCCAGTTCTACCTATTGAATTGGGTGATCTTTGTAA
AGCATTTAATTTTATTTATTCATCTGAA-GAAAGGGAGTACTCTTATTT-------------------------------
--------------------------------------------------------------------------------
--------------------------------------------------------------------------------
--------------------------------------------------------------------------------
--------------------------------CTCAAGAATTTTGGGAGGAGGAACAAACAGGCCAAAGTGATTTTTAAA
TTGTAACTGGTAATGAAATCTCCATATTGTGGTCATTGCTGTTTCTGTCGGTATCTCTGGAAAGTCTGTGAGGGCATGGG
AGGATTTTGTGTGGGTAGATGTGTTANGAGGCGAGCACTTCTTCACTGGAAACCACATCTGGGGTTCTAAAGTTCAGCTA
TTGAAGAATTTCCAAATAATGGAAGGAAGATAA---TGAAACAAT-----------------------------------
--------------------------------------------------------------------------------
------------------------GATTAA---GTTTTNNNNNNNNNNCTTTTAGTCATCTATGGGAGAGACAGGGAA-G
TTTTTTT---TATATGTTTATCAAACATTGTGCTTCTCTGTGTTCTAAACACTGAGGCTATAGCAGTAAA----------
------AAGACAAAAGTGCCTAATCTACGTGTAGATTATGTTTTAGAAAGAAGAGGTGGACATTTAAAAATAGATAATGA
TAATA---------------------------------------------------------------------------
--------------------------------------------------------------------------------
--------------------------------------------------------------------------------
-----------------------------------------------------------------------AAAGAAAGA
TGGCAAATGTACACTGAATGATGAGTTTGTGGTTGTGCTGTACTT--GTTTGTCTTAGCAG-CCCTTCTGATGAAGGGAC
ATGTAAGGAGAAAGTTGAAAAAA---GTATAAACGAAAGTCATGCAAATAGCAGCAGGATGGTAATTCTAGGCTGAGTAA
TGAACAAGTGCAAAAGCCTTGACGCATTAACAGCTCGCCCAGACCACTTTCAGCCACTTTTGGTTTCTCTTCCTCATCTT
CTTT-GTTCTTTGATATTGCAGTCTCGGCCAGTCTTTGATGTCTGTGCAATTAGAATGCTTTTTATTTGTACCATTCTTA
TACCATCCCCTTTCAATCTTCTCAGCCATCCAGGGGTCTTTAACCA-GAAGACAGAGGAGAGCCTCAGGAGTCAGGACCA
GAAGAAGCCAGGGAAGCAGTGCAATGGCTTCAAAAATCTTGCTTAACGTACAAGAGGAGGTGACCTGTCCCATCTGCCTG
GAGCTGTTGACAGAACCCTTGAGTCTAGACTGTGGCCACAGCCTCTGCCGAGCCTGCATCACTGTGAGCAACAAGGAGGC
AGTGACCAGCGTGGGAGGAAAAAGCAGCTGTCCTGTGTGTGGTATCAGTTACTCATTTGAACATCTACAGGCTAATCAGC
ATCTGGCCAACATAGTGGAGAGACTCAAGGAGGTCAAGTTGAGCCCAGACAATGGGAAGAAGAGAGATCTCTGTGATCAT
CATGGAGAGAAACTCTTACTCTTCTGTAAGGAGGATAGGAAAGTCATTTGCTGGCTTTGTGAGCGGTCTCAGGAGCACCG
TGGTCACCACACAGTCCTCACGGAGGAAGTATTCAAGGAATGTCAGGTAGAGCCCTAGATGGAGGGAGATGGGGCAGAAG
ATGGTAGTTGGTGGAAAATCTCACCTTTTCATCCTTTTTTTTTTTTTTTTT-------------GAGACAGAG-TCTCAC
TCTGTCGCCCAGGCTGGAGTGCAGTGGCGTGCTCTCGGCTCACTGCAACCTCTGCCCTCTGAGTTCAAGCAATTTTCCTG
CCTCAGCCTCCCAAGTAGCTGG-------------TGCCACCGCGCTTGGCTAATTTTTTTTTTTTTTTTTTTTTTTTTT
TTTTTTT-----GTATTTTTAGTAAAGACGGGATTTCACCATCTTGGCCAGGCTGGTCTTGAACTCCTAATCTTGTGATC
CACCCACCTCGGCCTCCCAAAGTGCTGGGATTACAGGTGTGAGCCACCATGCCTGGCCTTTTCTTTCTTTTTTTTTTTTT
TT----GTGAGCAATAAAGCTTTTTAATCACCTGGGTGCAGGCGGACTGAGTCTGAAAAAGGAGTCAGCCCTTTTCATCC
TTCTTTACCCCTTGTGGAACCGTAATTCTGAGTCCCGTGATCTTCTCCATGTACATCTTTCACACTATGCTCAGCTTCCA
ATGCCTGGGGTACACTCCTGTGTATTCCTTTCATTTACATAACAGATGATCCTAGAGTACAGTCTCTTAGCCAAGAATGA
GAGATTTTTGTCTTGTTTTTTCCTTTTTCATTGTATAAGTGATAAATTCCTTCCCAAAGTTAGCTCTCTTGCTTCTCTAA
GCAGGATAATTGCTAAGGAACATTGTGGATTGAACGAGGAAAGAGCATTGATAAGAGGAAAGGACTTTC-----TGCAGG
GTAAATACTTACTCTAAGGAAAGACAGAATCAGGCTACTCCTTTTGA-GGGGTATTGATTTTCATCAC-AGTGAATGAAC
AATACATTCATCTCCTCAAAATTTTCCCCATGTCATAGATTCTAATCACCAGCTTCACAGTTTCTGTAAATTGCT-TTTT
TCTGGGATCAACTTGATTTTTTCCCTGTTTGTCCTCTATCCAGATACTAAGAAAGCTTATAGCTTGACTCTAGTGTGATT
CCCTTCTCATAGGAGAAACTCCAGGCAGTCCTCAAGAGGCTGAAGAAGGAAGAGGAGGAAGCTGAGAAGCTGGAAGCTGA
CATCAGAGAAGAGAAAACTTCCTGGAAGGCAAGAGGAGATTCTGAAGGATTTCTGAGACAGGAATCTCGACAGGACCTTA
ATCCAAGGAGGCCTCGCCCTTTTTGTTCCTTGACATTGCATGAGTCCTGAAGCCATTTGATTAGCTCTCTTGTCTGTCCT
GTCCCTGTTGGGGGTGGAGGCTAGAAAGTGGACATGTTACAATC-ACACACACATACCTGGAACTGAGCACAAAGATAGA
CTCTATGATGAGGAAGGCTAGCAAATA-----------------------------------------------CTGTGT
TCCATTGCTCTTTTCCAATGGGGCTCTACTACTTCTGGTGGAAGACACTACATAAAGGACTATGGTTTTCCTCAAGATTC
AAATTAGGAGTGTGGTAAGGCAGGCAGTCATGAATATCCAGGAAAGCTATCTAGAAGCTAAGCCTTAT---GTTTTATAC
TTTGTCTCAGGGTTGGCCTAGATAAGACAGTTTGAGGTCATTGTTTTGGTAGGTACTGAAAGGAAAATAGTAGGAAAAAA
TAGCTTCCCTCCAAGTACCTCTATTG------------------------------------------------------
--------------------------------------------------------------------------------
--------------------------------------------------------------------------------
--------------------------------------------------------------------------------
-----------CTTC----TACTCCCTTGCTGATTTGAACTCCCTGAAAAAAAAA-------TCGATATATAGATAATAC
AAATATATATATA------CAGATA-----------ATATAAATACACACACACACACA--------------------T
ATATATATATATATATATATTTCCCTACTGGCTCCTAATCCCTTGCACAATAGGCCCTTAGCCTGACAAACTTACTACAA
CTCTCTCTTGTCCATCCTTGCAGTATCAGGTACAAACTGAGAGACAAAGGATACAAACAGAATTTGATCAGCTTAGAAGC
ATCCTAAATAATGAGGAGCAGAGAGAGCTGCAAAGATTGGAAGAAGAAGAAAAGAAGACGCTGGATAAGTTTGCAGAGGC
TGAGGATGAGCTAGTTCAGCAGAAGCAGTTGGTGAGAGAGCTCATCTCAGATGTGGAGTGTCGGAGTCAGTGGTCAACAA
TGGAGCTGCTGCAGGTAAGAAGGTTCACTCAATCTGAGATTCTGGGAACACAGTT---------CCCTCCTGTGTCCTTG
CGTTCTCATCCTGGTGGTGACACTAAGGGGTTTCTTTGGCCTTGCAGTGCCGCCTTGTCGTCCATTCTAGATGTCATGGA
CATGAATGA-------------------------CATTTTTATTAATTTATAAAGTAAGGGAATACATTTTACCTTGCAG
AAAAGATCCATTATATCTAGTTATAGTCTCTAGGCCCCTGTTATATGTGATCTAGTGTCAAGCATTCATCAGACTTCTCT
TTACTCAGGTTAGTCACAGGTAAACACAT---GCATTTTCAGGTTTAAGAGCATACACATTTAAGAAATGTGTTCTATTT
AAGTTTAAAATATGCTTATTTGTT--------------------------------------------------------
--------------------------------------------------------------------------------
--------------------------------------------------------------------------------
--------------------------------------------------------------------------------
---------------------------AT-GCAAATGTTCCCTGTTAATTTTTTTTTTTTTTTTTTTTTTTTTGAGACGG
AGTCTCGCTCTGTCTCCCAGGCTGGAGGGCAGTGGTGCGATCTCGGCTCACTGCAAGCTCCGCCTCCCAGGTTCACGCCA
TTCTCCTGCC-CAGCATCCCGAGTAGCTGGGACTACAGGCACCCACCACCACGTCTGGCTAATTTTTTTTGTATTTTTAG
TAAACATGGGGTTTCACTGTGCTAGCCAGTATGGTCTTAATCTCCTGACCTCGTGGTCCGCCTGCCTCGGCCTCCCAAAA
TGCTGGGATTACAGGCCTGACCCACCGCACCCAGCCCCCTGTTACTTTTTTTTAAACATAAAGTGATAGAATATTGAGCC
TTTTGGGGAGAAAGATGGACAAATATATAGACAGACAGTGCTCTCCTTTCTTTGCTGAATTTCCAAATATTTCCTTTTTA
AGATTTGGAACGAAGCAGGAGAGTAACTGATTTTCATTTGTTGAATTGTTTGCTTTGTCTCTAGTGCTTATATCCCAGCT
TTTTTTAAACTCCTTTTTCCTTTTGTCTTCTT-TTTTTGTTTAAATTTAAGATTACTCTGGAACAGAGGTTCCTAAACGT
ATTTTACACTCATTAGTATGGCTATAATAAAAAAA-GATGGACAATACCAAGTGTTTGGGAAGATGTGAAGAAATTGAAA
CCTTCTTGAATTGCTAGTGGAGATGTAAAATA--GTAAAGCTTCTTAGGAAAAACTGCTTGGCAGTTGCTCAGAAATGTA
AAGAGAGTTCTCA-TGTGGCCTAGCCATTCCATTCCTACCTATATACCTAAAAGAACTGAATACATATATTTGTGCATAA
ACTTATATATGAAAGTTCACAGTAGTATTGTTCATAAATAAAAACAACTCGTATCTCCTTAA-CTGATGATTGGATAAGC
AAAATGTTTTATATCCAAACAATGTAATATTGTTTAGCTGTGAAAAATAATGAATTAATAATACATGCTATGACATGGAT
GCACCTTGAAAACATTAT---AATTGAAAGAAGGCAAACACAA-GTTCTTTTTTGTATGATTCCATGTATATGAA-----
-----AGTCTGTGAGTAGCAAATCCATAATATAGAAACTAGATTAGTGGTTGCCAGGGCTCTGGGGAAGAAT----AGGA
AGTAATTGCTAATTAGTGTACAATTTCTATTTGTAGTGATGAAAATGATCTGGA-TTTACTGTGCAATGATGGTTGCACT
ACATTGTGAATATTTTAAAACCTGTTA-----------------------------------------------------
--------------------------------------------------------------------------------
--------------------------------------------------------------------------------
--------------------------------------------------------------------------------
------AATTGTGCACTGTAAAGGGCAAATCTT-ATGGTATTTGAACTACATCTCAGTAAAAACAAAAACAAAAAGGTTC
CGTAGGCCCTTTTTTATGGTTCTTCCTTAAGCTCTTCACAACCCTTTGAATCGCCACCTTCACAAAAGAACACTGTGTTT
ATGTCATTTGTCCAGGCATTTGTCCTATTTAAGTCAGTCTTAGTTGCTAT-TTGGTCACTTGGAATTTAAAAAAATATTG
GTAGATCAAAAATTATAAATGCTGTGGGATTAACATTTCACTTCTAGATGTTAGCTTCAAAGAATGGCAAATGGAAAACT
TAGGAACTTATTCTTTTATCTGAGTAGGGACTTTGGCTATTCCTCTCCAATATGTTAAGATATAATCTGTTGGTGGGGCG
CGGTGGCTCACGCCTGTAATCCCAGCACTTTGGGAGGCTGAGGCGGGTGGATCACGAGGTCAGGAGATCGAGATCATCCC
GGCTAACACAGTGAAACCCCGTCTCTACTAAAAA-TACAAAAAATTAGCCGGGCATTTTATAATATACAAAAAATTAGCT
GGTGATGGCGGC--TGCCTGTAGTCCCAGCTACTCGGGAGGCTGAGGCAGGAGGATGGTGTGAACCCAGGAGGCGGAGCT
TGCAGTGAGCCAAGATGGCGCCACTGCACTCCGGCCTGGGCGACAGAGCGAGACTCAGTCTAAAAAAAAAA---------
-------GATATGTGCTGTTGTATTTGTGGTATGTCTCCTCCACAATCCCATCTCCTGAGAGTCCCTGTAACAGCTTTCT
TTCTATATGGATTCTCATGATGGCGATCGGGATGGATGGTGTTATCAAATATCCATTGTTTGTTTGCTAGAGGGACTGAT
ATTC----------------------------------------------------------------------------
--------------------------------------------------------------------------------
--------------------------------------------------------------------------------
------------------------------------------------------------------------ATTTCGTA
AGAGCTACATTCAACACTTACTGCCAAAGAACGATCTAGACAGAAAGACGCTAAACTTGAAAACTG-TGCAAAAATTAGA
TGAGATTTTAGGTTGTTTCCCTTATAAAGGAGATACTTTGATTTTTAATGCTTTCTGTAATAGTTTTATTATATTTGGCC
ATTTTTATTTTTGAAAGGATGGAATGGTAGGTAGCTAAATGAGGGAAAGAAGATGGCAGTTACTATTATTT--AAAATTT
TTTTTTCCAGGTTTCTT---------------------------------------------------------------
--------------------------------------------------------------------------------
--------------------------------------------------------------------------------
--------------------------------------------------------------------------------
--------------------------------------------------------------------------------
--------------------------------------------------------------------------------
--------------------------------------------------------------------------------
---------------------------------------------------------------AAAATTTTAGATTCAGG
GG-CACATTCAATTCAGTGGCATTTAGTACATTCAGATTGCTGTGCAACCATTAAGTGGGATCCCTCTCTGGACTTTTTC
ACCATCCCAAACTGAAACTGTACCCATTAAAAAACAGCTCCCCATTCCCTTTGGTCACCACTGCTCTACTTCGATAACCA
CTATTCTACTTTCTGTCTCTATGACTTTGCCTATTCTAAGTACCTCATATAAGTGGAATCATAGAATACTTGTCCTACAG
GTTTCTTATAAGGGTCTATTGCGTAATGCTAGGGTTTGGGCTACATGGTACTCATTATTTTTGTTTCGTCAATCTCCATT
CCCCGTTTTTCTGGTAATAACACCTGGAATTACTCTTGGAAGAAAGATTAGCATGTCTATTTCCATCCTTGTACTTGTTT
AGACCTGAGAAAATCAGCACTATCAAGAATGAATGAGTTAATTATATGTAAATCAGCGTATCCAATCCTTACATCCCTAC
CAGCCACACA----------------------------------------------------------------------
--------------------------------------------------------------------------------
--------------------------------------------------------------------------------
--------------------------------------------------------------------------------
-------------------GTGATTATTTTAAGTTGGACATCTGACCCAATCCTGAATGCTTGTGGGTGACAAAATTGTA
CTGTCATTGCAGTGAAGGGAAGTTCTCCTTTTCAGCAGAAAATAATATCAG-GAAGATAATTCAAATAAAGAGATTCAAG
TTGCTATCAACTAAAATCTGAGAATACAGTCAAAATATAGGGAAGAAATGAGAATTAATAGGCACAGAGAGGCCAGAATT
GTGACAGAGGTTTGAGCTTTCAGAGCCATCTGTGACTAAAGTAATACCTCTCTGGCCACAACCCTTACTTTCTTCCCAGT
TAAGGCAATTTTAGTTGTTGAACAACAAAACTATGCTAATATAGAGAGCAAAACCATTTATTTGGTTGTACACCAGCTGG
TGTCATGAAAGAGT-AAAGCCAAATATATTGGTACATCTTGCTCAAAACAAATTAACCCATAGTGGTGATGATGGGGGAA
TGCAGATGACTAACAGAAGTTAAGGATGGACTGGGTTGATAAAATGTTTTAGTGTCTGGGACAGGGACTGAGTGAATATT
GATACCATTTTGACAATACAGCATAAGAAAGGAAACAATATGGTTGGAGAACAGCTTATGTTTTAGATATTCTTAGTTAC
TGGTGCC-GTTTTTTCTTCTTTGTGGGATGTAGTATTGTACCTGTACAGAATGAAGTCTAGCTGCTTTTTTTCAC---AG
TCCAATGAGATGCAGACAGACTTGGAAAAGAAGGGAGTTTATTTTTGCAACTGGTTACAGGGAGAAGGTCAGAGTAACTT
ATCAGACCAACTCAGAGTTACAAAGTTTTTTTTTCCTGGTGCTTATATACATTTTAAGCTCTATGCCTTCACATGGGAGT
GCACCTACATGCAGGAGTGTTTCATTCAATCTACATCTATCTTTAACTAGGGTCTGGGGTCTAGA--------------G
TCTTGGAAAGTTTCTTAATCTTAAATGGGCCCTGGTACAAGTTGTATGTGTAAGAATGCTTTTATTATTCGATCAGACTT
TAGGGTATGAGAAAACCCAGGCAGGGTCTTTAAAGGGTTTGTTTTCGCATTTCAGCCCTGGTACTCAGGCA----CCAGC
TTTTCCAGTTCTTTAATGTTTAACTTACGCATTCATCAAAATTATAGTAAAAGGTTAAGGGAAACTGATTGTTCTGGTTG
CTAATGGAAACCTGACCTGCCACAGTATTATAGAAACATGATTACAGACAAAAGACAATGATTAGATATGTAAAGGTTGA
CAAAAAA-CAGCACCTATGTGTGAGCTAAAATTAAGATTGGAGGCCGGGCGCAGTGGCTCACACCTGTAATCCCAGCACT
TTGGGAGACCGAGGCGGGCGGATCATGAGGTCAGGAGATCAAGACCATCTTGGCTAACACAGTGAAACCCCGTCTCTACT
AAAAATATAAAAAA-TTAGCCGGGCATGGTGGCACGTACCTGTAGTCCCAGGTACTTGGGAGGCTGAGGCAGAAGAATCG
CTTGAACCGGGGAGGTGGAGGTTGCAGCGAGCCAAGTTCGCACCACTGCACTCCAGCCTGGGTGACAGAGTGAGACTCTA
TTTCAAAAAAAAAAAAAAAAAAAAAAA-----GATTGGAAGAGGTTGCCTATAGGCGGTGGATAGAACAGGACTTTTCTG
ACTGTACATAAGACTATGTCATCTGTAAAAAGAGATAGATTTACTATTTTCTTTCCAATATAGAAGCTTTTTTAAAAATT
AGTTTTTATTGGTACTTAATAAGTATACATATTTATAGGGTACATAGATTTTGGCACAGGT--ATACAATGCATAATAAT
TACATCAGTACATCAGAGTAAATGATGTAT--CCATCACCTCAAGCATTTATCATTTGTTTGTGTTGCCAACATTCAGAT
TATACTATTTTAATTATTTTAAATGCATAATAAATTATCGTTGACTATAGTCACACTGTTGTGGTATCAAATACTAAATC
TTATTCATTCTATCTAACTGCCAACATAGAGCCTTTTATTTGTTTTCTGTGACTAACTGCCCGGACTAGAACCTCCAATA
CCATGTTAAATAGAAGTAGTGAGAGCAAACATCCTTGTCTTTTCTGATCTTCGGGAAAAAGCATTCAGTTTTTCACCACA
AAGTATGATGTTAGCTGTAGGTTTTTCATAGATGTGTTTTATCAGGCTGAGGGACCTCTCTTCTATTCCAAGTTTGTTAC
CATTCCTGTTTT---ACTTTGTTTTTTTT-ATGAAAGTGTGCTGAATTTTGCTGAATGCTTTTTTT--CATGTCTATTGA
GATCAACATGTGGTTTTCATCCTTTATTTTATTAATATGGTATATTACATCAATTGATTTTTTTT--ATGTTGAACCAAC
CTTGCATTTCTGGGATAAATTCTACTTGGCCATCAGGTATAATCTTTTTGCTGGATTGCCAGATTTGATTTTCTTGTATT
TTTGTTGAAGAATTTTGTATTTATATTTATAAGAGATATTGGTCTATGGTTTTCTT-----GTGATGTCTTTGGTTCTTT
TATCAGGG-TCCTTTATCAGGGTAGGATGAGCCTCATGTAATCAATTAGGAAGTGTTCCCTGCTCTTCTATATTTTTGAA
ATAATTTATGAAGTTTTGATATTATTTCTTTTTAAACCTTTAGCAGAATTCGCCAGTGAAGCCATCTGGGTGAGGCCTTT
TCTCTGTAGGAAGTCTTTGAATTCCAACTTAATCTCTTAACATGTTTTAGGCCTATTCATATTTTCTATGCGTTCTTTAA
TGTGTATTGATAGTTTCTGTATTTCTAGGAATTTGTCTGTTTCATTAAGATTATCTAATTTGTTGGCATACAGTTGTTCA
TCA-TTTTATAATCCTTTTAATTTCCTTAAGGTCAGTAGTAATATCCCATCTTTCATTCCTGATTTTTTTT--CTTGGTG
TGTCTAGCTAAATGTTTGCCAATTTTGTTGACATTTTCATATAACTCACTTCTGATTTTTCCATTTTTTTTT-CTACTGT
TCTTCTTTCTTTCATTAGTCTTACACCAGTCTTTATACACTTTGACTCATGTTTTCTCTTTTCTTTCTAGGACATGAGTG
GAATCATGAAATGGTGCGTATGGGTGGCCAGGAGTGGTGCTTGTGAGTTATAAAGAAGTGTTTGTAGCTATTAGAGTTAT
TTGGTGGTCAATTGGAATAAAAAAATCTCCCAGAGTAGTAAAATTTGGATGTATCGTTATCTTAAATTGCTGGTCCCCGA
TGAGTATTTGAGTGTTCCATAAC---TATTAATGGACTCGATCCTATGGTAGTAAATTCAGTGGTTGAAGTTCAGAGCTA
CAGCCAAAAAGGATATTAAGGATGAGAGCTTTTACTGTCAGACTTCGGTGACTTCACTCATTTAATTCATCCTCTGTCCC
GGCATCCAGCCCTGGATCTTTTATTTTATATGTGTTTGTCATA-CACATGGAGGGCCTTGTCAAATCCTAAAATAGGGCA
TGGAGACAGCTCCTTTATATTTACTTTGCTTACTTAGAAATAGAAGGTACCGGATCATTATGCAAGGTT-----------
--------------------------------------------------------------------------------
--------------------------------------------------------------------------------
--------------------------------------------------------------------------------
--------------------------------------------------------------------------------
--------------------------------------------------------------------------------
--------------------------------------------------------------------------------
--------------------------------------------------------------------------------
--------------------------------------------------------------------------------
--------------------------------------------------------------------------------
-----------------------------------------------------CTCTTTAGATTTCCAAAAGTAGACTCG
AGCCTCAGGACGATAGCTGTGACTCTGGTGATGATAATTAATCTCTGCCAGTTCACACACTTTAGAAGCTCCTATGGAAA
AGTGTAGTCCTTGTTCCTTGTGTCTACCATTGCCAACCCACTTGGAAACATCAAGTTTCTTACAAAGACATAAAATTCTA
ACCATTTTTAGTTAGGTTGTCATAACTTCTCCTTTGCCGAGTGTTCGTGTTTCCCAG-GAATCTGAAATCTCAAATATGG
GCCATTCCACTGCAGTTCAGGCTTTGAACTCGGGCACAGGCTGACAGGATTTCCCTACAGAGCCCCATATCACAGTCAGG
ATCTACAACT----------------CAGACTACTACATCTCTGGCCCCTCCCAGAAGACCCACTGAGATGCAGTGAGTT
TTCCACATATCACATACCATTTCTACAGGTAGCAAAGTCTTTTCCTATCTATTGTTTTATCCAATTTTTTATTATTTCCA
TTAGATATCAAAGGAGGGTTTAATTATTTCATTTTT--AAGGAAGAAACAGTGCTTTCAAGAAATGAAGACCTTCTCAAG
GTCACCCAGAGGATAAGAGGGAAAGTAGACACAGTCACATTTCTTCTGGATCCAGGGTCCGGCTCTCCCTTCTCCCCCTC
CTCAGGCTCAGGGAGAAGGGTTCAAGTGCATCAGTGATGTGAAGGAGATGAAACCAGTGATGTGGGAGGGATGGACACAG
GATGAGAGATGTGGGGGTCAAAAAATTTTTTTCATCCCTAGGAGTGAGATCTGGAGGCTGAAAAAGCCAAAAACGGTTTC
CAAGAAACTGAAGACTGTATTCCATGCTCCAGATCTGAGTAGGATGCTGCAAATGTTTAGAGGTGAGGAGAAGCAGACAA
AGACTGTGGATGTGGGATTGTTGTGGTGTCAGGTAATAAACTGTCTAGGTGGGATAACTTAAAATTGAGGACAGAAGAGA
GGAGGGAGGTCAGAGAATAAGGAATATTCTGTGGTGAAGAGGATGCATTTATATGTAAAGAAAAATGGCTAGGTCTCTGG
TTTATCTTTT-AATTCACTAGCTCACAGCTTCATGGTATTCCCTTCCCTTGTCCCTACTCTAAAGAATAGATAGGTATCA
GTGCTTACTCCTTTGTTTCTAATCAGCATCACTGAATCTTTTATTATTTCAGAACTGACAGCTGTCCGGTGCTACTGGGG
TAAGAAAAAGTTA--GTCTTTAAATAACTGTTTTCCAATTACCTTTCAGAAGTTTATGG-------TTTCAATGATATCT
TCTGATCTTAGCCTCATGCGTTCTCAGCACCTCCCAAAACATTTGCTAAATACATTTCTCCAGTGTTTTACCCC-TCC--
-AATT-CATCAGTGCAAGTTTTTCAGTCACTTCCCAAGTTCATTCATCACAATGTCACTAGATAAACCTACTCCAT-ATC
TGTCACCTAATCATATATATCACACAGATGATTATATTCATATACATATATA-TATATT---------------------
---------------TTTTTTTTCTTGCAGTGGATGTCACACTGAATTCAGTCAACCTAAATTTGAATCTTGTCCTTTCA
GAAGATCAGAGACAAGTGATATCTGTGCCAATTTGGCCTTTTCAGTGTTATAATTATGGTGTCTTGGGATCCCAATATTT
CTCCTCTGGGAAACATTACTGGGAAGTGGACGTGTCCAAGAAAACTGCCTGGATCCTGGGGGTATACTGTAGAACATATT
CCCGCCATATGAAGTATGTTGTTAGAAGATGTGCAAATCGTCAAAATCTTTACTCCAAATACAGACCTCTATTTGGCTAC
TGGGTTATAGGGTTACAGAATAAATGTAAGTATGGTGTCTTTGAGGAGTCTTTGTCCTCTGATCCCGAGGTTTTGACTCT
CTCCATGGCTGTGCCTCCCTGCCGTGTTGGGGTTTTCCTCGACTATGAAGCAGGCATTGTCTCATTTTTCAATGTCACAA
GCCATGGCTCCCTCATTTACCAGTTCTCTAAATGTTGCTTTTCTCAGCCTGTGTATCCATATTTCAATCCTTGGAACTGT
CCAGCTCCCATGACTCTATGCCCACCAAGCTCTTGAATTTTCTCATTTCTTCACCTACAACCCTTTGTCTCGACTTATCT
CCTGCAACTGACTCATCTGCAACATTCAGACCATTGCTTCCTTGTGGTTTCCCTTC-----TTTAGAACTTTTACTCATC
CTTGAGATGTACGGTGTATTTGGCTTGAGTTATGAGAGATGCTTATTTATTCATTTACTCTTTTTCATATTTTCAGAGAA
AGTTACCTAATCCCTCCTAAAGACACAGCAGTATGGGTATAACATCCTTGCCTTCCCATTTATCCATGTTTCACTTTATC
ACTGATGTGAAGAGGCCCAAAGCCTGTTAGCCACCATCCATGCTACCTAGGTAGTCCATAGGAACCACCCCCATGACCAC
CACCAACATCAACTAAAGGTTCTTGGAGGGTATGTCAGTGTGTTGCTCAGGATACCCCAGGTACATCAAGGAATCAAGGA
GAGGAAAATATGAGCAATATGTGTATTCAGAGTGAAGATTTTATGTCCAGAGTATTTGAGCTCAAACCTTGTCTCTTGTT
TTCTAATCATGATGAATACTTTCTCAGTTTCTTTTTCCTGAAATATAAATTGGGATTTAAG-------------------
---------------------------------ACTGTACCTAACTATTAAGATCACTGTGTAAAACTAAGTGTCTCTAA
ATGTAATGCAACGATTTAGTGTCTGGAACATAATAAATATTTGCTCTCATGATTGCTAAAAA
>Nomascus_leucogenys_TRIM34
ACCCTGGCTTTTCTGCACCTCTTCAACCAGGAGCCGAGATTTCTGTAGGTCTGAAGGTGTGTGGGGAGGTTTGTTGGGGG
-TAGAGGGTATGAGACTCCAGGAGAAAAGTTCTCAATGAAGTTAGGGGAATTTGATTTATGGCCCCAAGGCTCCCCTGCT
CTGTGGGGAGCAAAGGCTAGCTTGCAGGCTTCCTGCTTTGAGTGCACACTGAT------------AGCAGCCTAGAGTCT
GGGGAGGGACAGCCTTGAAAGCAGTGTTAAAGAGGCAGAAGGCCGCCTTTGTTTTCTGGAGTGTCTT-TTTTTT------
-CTCCAGGCTGAATCCATTTCCATTCCCTTCCTATCATATAATTTTGATTTTCTACCTTGCAAAGGAAACTGAATTCTCT
CTCT-------TTCTCTCTCTCTC----TT----------------------------------------------AAAG
AGATGAACAGAAGATCTCTTATTTTCCACCCCCTCCTCCCTCCTCAAAAGAGAAGTTGGTGAGAGGAGGTCTCTGTTTTC
CAAGAGTGTGCAGGGCTTAGCTCCTAGTATGTGGCGTCAGATAGAATGGAGCCA---TGGGAGCATGGCCAGGCG-----
TTGAAGCGGGTTCTCTCGCTGCCCTCCTGGCA-CCACTAAGGGGCTTTCTGTGGCCATCCTCACGTATTCTTAGTCCTTG
GCCTGCCTGACAATAGCAGGTTGAGTGATCTGACTGCTGCACACCGCTCTGTTCCCTCTTATCCTATGTCTTTCTGCGGG
TTGTCTCAGGGCTCTCCTTGCACGTCCCTGAACATACCAG----------------------------------------
--------------------------------------------------------------------------------
--------------------------------------------------------------------------------
--------------------------------------------------------------------------------
--------------------------------------------------------------------------------
--------------------------------------------------------------------------------
-----------------------------------------------------TTTACTTTTACTTCAGTAACCCATGTG
CCACCAGCGTCTTCACCTGTCTCAGAACTTGCTCCTCATCATTCTTCGTCTTAGACACACCTTTGCATTGATTGGTAACC
CCAATTTCTTA-TTGCTTTTCTTTGCTCACAATTACTTAACAGAAGTTGTTTATTGTGGGCTCAGAAGGAGCCCACAGAT
TTAATCTTCTTGTT------------------------------------------------------------------
---------------------------------------------------------------------------AAGAA
TTTGACATAAGAGTATGTCCTATCTTAAGCTCACTTGTGAGCAATTTG----CACCTTGATTGATATGTTACAGATATTC
TGACACATGCCATTCTGGCCTCTGCTCTCACCCTTCAGAGTTCACTGTAACTGCCATCCTGTGTCTCTGCCTTACTCCTG
GGTAGAATCCATGTCTGCCTACATACTGACTGTCTCCCAGAGGCGTCTAGTCAGGCACAAGACCCAA-CATATGGGATAA
AATTGATTATAAAGCAGGCTGCTAATGTAAAAACGTGCAATTAGCATCCATTCAACATTCAATAAAT----ATGAAATAT
ACATGGAAGCCTACATTCTAATTAGAAAGTGATCATAGACCATATCAATGAATGATAGAGCACACGAGAAGATGACTAAT
ACTATGGAGTAACATCTTC-------------------------------------------------------------
--------------------------------------------------------------------------------
--------------------------------------------------------------------------------
--------------------------------------------------------------------------------
--------------------------------------------------------------------------------
--------------------------------------------------------------------------------
--------------------------------------------------------------------------------
--------------------------------------------------------------------------------
---AAGAAGTTACATTAGGGTAGTGACTCTGTAAAGACCTCATGAAGGCCTTG---------------------------
--------------------------------------------------------------------------------
--------------------------------------------------------------------------------
---------------------------------------------------------------------CAACTTTAAAT
AGTTTTTATGAAAGTTTTAA-CAGTTTTCATTGTAAGAA---CACATTTGAGTAGAATCTTAAGAAT---GTGAGGAAAT
TAAAGGCTTTAA-TGGTTTTTCCCACGGACTTAAAAGGAGAACAGTGTTGATACGGAAGGTTAAGATGGGAGTGTGCATG
GAGAGGAATAAAAGGTGAGCTCTGGCCAGGCACCGTGACTCACACTTGTAATCCCAGCAATTAGGGAAGACAAGGCGGGA
GGATCACCAGAGATCAGGAGTTCAAGACCAGCCTGGCCAACGTGGTGAAACCCTGTCTCTACTAAAAAAATGCAAAAATT
AGCCAGGCGTGGTGGCGGACGCCTGTAGTCCCAGCTACTCGGGAGGCTGAGGCAGGAGAATCAGTTGAACCCAGGAGGTG
GAGGTTGCAGTGAGCCAAGATCTCGCCATTGTAC--------TCCAGCCTGGGGGACAAGAGCAAGACTCTGTCTCAAAA
AAA-----------------GAGGTGAGCTCTGAGGATTGAGGCAGTGGGAAGGGATGTGTGATGTGGACCTAACTGGAC
CATTATGAAGTCTGGCCTCACTCTGGATGGCATGGGTTTGAACAGAAGAGCAATGTGAT---TGACATCT-GCTTTAAGG
TGATCACTCTGTCTACTGATGTAA-AACAAAGATGAGAGCAGAGTGAAGAAGGACAATGATGGCTGGGCACAGTAGCTCA
CGCCTATAATCCCAGCACTGTGGGAGGCCAAGGTGGGTGGATCACCTGAGGTGGATCATGAGTTTGAGACCATCCTGGCC
AACATGGTGAAACTCTCTCT--ACTAAAATTACAAAAATTAGCTGGGCGTGGTGGCAGACACCTGTAATCCCAGCTACTT
GAGAGGCTGAAGCAAGAGAATAGCTTGAACCCAGCAGGCAGAGGTTGCAGTGAGCCGAGATCATGCCACCACACTCCAAC
CTGGGTAACAAGAGCAAAACTCCGTCTCAAAAAAAAAAAAAAAAAAA--------GTAAGGGCAATGATAGTATCAGCAA
GACTAGTGGAAGAACAATTTCCTGAATTCAGGTGGTTTCTACCAGAGTGGTGGCAGTTGAGGTGGTTGGAAACTAATTTG
AAAAAAAA----------CTCTTTCAGCATATTCTCATGAAGTAACAGACAGAAAAAGAC---ATTAGGGGTTGCTTAAT
GAAAATAATTCTATGTTAAAAAATAA--------------CTATTTGGAGATATATTGACCAGAACACTACAGCTCTTGG
GGAGAGAGTCATTAATGTGGTGTAGATTGAGCCCTGGACTCTAAGGAGTAGCTGAAGCAAGAACTCAGTGCACAGAGGAA
TGGGGAGGAGATGTTACAATGTTTCTGAGCTCTCAGGGCCTCTGGATGTCAAAATAGGCTCTGCTTTCCTTATTGGCAGT
TTCTGACCAAGAATCCAGAAGAAGTGTCTAGGATATTGTCTAGAAACTTCAAAAGACATCCTCCCCCTAAAAGTCACTCT
TAGAGACACTCTAATTTTACTATCTA-CCTGTGGAAAGACTTA-AAGTTTGCGTTATCATATCCAGATGTTAGGAGTCCA
GATGTTAGGAGAAGACTTA--------------------GGCAGCTATGGTAACCAAGTAACCTGGGAGTTCTGTCAGGC
CAATGGCGATCATGTTCCCTTCTCTACCTCCCTGACTGCT-CTG---GGCTTGAGCCACATTGGGAAGTGGTGGGGTCAT
TTCTCACACGTGGGACCCTGGTTACTCTGCACTTTTCTCATTCTTTTGCCATTATGGTGGCAGCAGCTTTGGCATCAACA
TGCAGCCTCACTGTGAACATTAAGTCACAGCCCGTGGCAGAATGCATGTTCTACTACTTCCTCTCCTGGAGCCCCCCGGT
ATTTCTAACTATTGGTTGGATACTGATTTGAATAAAAGATAAC----AAGCCCACATCTGTGGTTGGCTCATA-GCTTTA
GCCATAAACAGGGGTGAATATTATCATATCATATAAACTCCTGGTCTTACTAGTCATCAGATCCTGGTCTGACCAATGGT
CATTGTAGCCAGGGG-CTACCAATATATCTCTTTTGTATGATTTTTAGTATCTGTACCATTGGCTGGATGACACTCGCCA
GCCAACTTTCAGCCTTTTTTCCTCCTTAAAATATTTTGATGGATGGTTAGAGGAGTAGACAGGTCTCGAGGNNNNNNNNN
NNNNNNNNNNNNNNNNNNNNNNNNNNNNNNNNNNNNNNNNNNNNNNNNNNNNNNNNNNNNNNNNNNNNNNNNNNNNNNNN
NNNNNNNNNNNNNNNNNNNNNNNNNNNNNNNNNNNNNNNNNNNNNNNNNNNNNNNNNNNNNNNNNNNNNNNNNNNNNNNN
NNNNNNNNNNNNNNNNNNNNNNNNNNNNNNNNNNNNNNNNNNNNNNNNNNNNNNNNNNNNNNNNNNNNNNNNNNNNNNNN
NNNNNNNNNNNNNNNNNNNNNNNNNNNNNNNNNNNNNNNNNNNNNNNNNNNNNNNNNNNNNNNNNNNNNNNNNNNNNNNN
NNNNNNNNNNNNNNNNNNNNNNNNNNNNNNNNNNNNNNNNNNNNNNNNNNNNNNNNNNNNNNNNNNNNNNNNNNNNNNNN
NNNNNNNNNNNNNNNNNNNNNNNNNNNNNNNNNNNNNNNNNNNNNNNNNNNNNNNNNNNNNNNNNNNNNNNNNNNNNNNN
NNNNNNNNNNNNNNNNNNNNNNNNNNNNNNNNNNNNNNNNNNNNNNNNNNNNNNNNNNNNNNNNNNNNNNNNNNNNNNNN
NNNNNNNNNNNNNNNNNNNNNNNNNNNNNNNNNNNNNNNNNNNNNNNNNNNNNNNNNNNNNNNNNNNNNNNNNNNNNNNN
NNNNNNNNNNNNNNNNNNNNNNNNNNNNNNNNNNNNNNNNNNNNNNNNNNNNNNNNNNNNNNNNNNNNNNNNNNNNNNNN
NNNNNNNNNNNNNNNNNNNNNNNNNNNNNNNNNNNNNNNNNNNNNNNNNNNNNNNNNNNNNNNNNNNNNNNNNNNNNNNN
NNNNNNNNNNNNNNNNNNNNNNNNNNNNNNNNNNNNNNNNNNNNNNNNNNNNNNNNNNNNNNNNNNNNNNNNNNNNNNNN
NNNNNNNNNNNNNNNNNNNNNNNNNNNNNNNNNNNNNNNNNNNNNNNNNNNNNNNNNNNNNNCCCTTTTTCCCTTTGCCT
CACAGTTTCTTGTCTAAACTGACCTCAGGTTCTGAGAATTGGCATTGTATCATCATGCCACTACTCTGCGGTAC-ACCCT
CTGGCTGACCACAAGCAATAATTGCGGGTTTGTTTTGCCATTTGTACTCATGCAGCTTAACTCCACAGGGGGAATACAGG
ACAGGAGATATAGCATGCAGACAGG----GCCGCTTCAGATGAGCTCTCTGTGAGGATTCTTTTT----GTTTTGTTTTT
TGAGACAGAGTCTCGCTCTGTCGCCCAGGCTGGAGTGCAGTGGCACGATCTCGGCTCACTGCAAGCTCTGCCTCCCGGGT
TCACGCCATTCTCCTGCCTCAGCCTCCGGAGTAGCTGAGACTACAGGCGCCTGCCACCATGCCTGGCTAATTTTTGTATT
TTTAGTAGAGACGGGGTTTCACCTTGTTAGCCAGGATGGTCTTGATCTCCTGACCTCATGATCCGCCTGCCTCGGCCTCC
CAAAGTGCTGAGATCACAGGCGTGAGCCACCGCGCCCGGCCTCAGTGAGGATTCTTATGGTGGTCCAAGACCATGTG---
-----GATGTGTGTGAAACTAACGTAGCTTAGGTAAATCTTACATCAACAGACTGATTCCCTTGTAAAGACCATGAGCAT
AGCTTCCAGGGCCCTACAGAGAATATTTTGTTACAAGAGTCTCAACCCTCTTACGGAAAAGGAGGTCTGTGCTTACCAAA
A--------------AGAATAAAAATAAAATAACGTACCAGGGGATGGTGATGGCGATGTCTTTTTTACAGGA-GAAAGG
ACTT-AAGCCTAATGATAACCTTTTT-TCCCCCACATGTCTAGTCTGACTTCCAGTCTTATTTCCTTTACCTTACCCTAC
TTCCCACCCTCATCTGCTTCTCT--GTTTCCTCTGTTAACTTGTCCTGCATCCTCCCATCCCTGCCCCCACCTCCTATTC
ATTGGAAAGAGACTGTCACTTTTACTTCATTTAGAAAGTGTCACATATCCAGGTTCCTCTAGGCTCATGTGATGCCAAGG
-CCTAGGGCTTTTTGAATACCAGCCACACATTTAAAAACTTTCAAATATGTTATGATGCTATGTCCTCCATGAACAAACG
GGGCATTCACTTACATGATTCCTTCTACCTAAAATATTTGTTTTCTTTCTCATTCTGTATTCCTTTCTCATTATTCAGCT
TTCATT-AAACTCTTACTTATCCAAGCAAGATATCTTGGATAGTTCTCTATTTAGCAAATTATTTGATTTTCTAAAAACC
TATACCTCTCTATGATGGTGTTTTTT-ACACC-----------------TACCATTTTACACTTTATGAATGATTATGTA
ATTAGCTTCTATCTTCTTTAGGTGACTATTTA-----TTCTGGCTAATACCATCTGTTCAT-ACTCAACTTTGGATTTTA
ATCCATTTCCTGGATTTTAATCATGGAAGATAATGTGTCTTCAGTGAGAATTTCCAAAATAAACACATGAATAATTGGCA
TTCAATTAGTGGATGTGGATTTAACACAGACAGAA---CTTCATTGTTCCTAAATGTGGTCTCCCCTTATATATTGGGAC
ATCTCTCTCATGACCAACAGCCATCTCCTTGGTATTTCTATTCCTCAATGATCTGACATTGGTATGAATCTGTGATCTAT
GTGTAATTCAGCTGGTTACACCCCCTCTGCCAACAAATACACACCTTTGGGTTCCTATCAACCTCTATAACATCCTT-CA
GGCCAAGATGAAATC----CTACCATCTACAAACACAAGACCCCCC-AGAAATTCCCAGCTTATGTGGTTTCCTCCATTT
CTACACTCTCATAACCCTGGATCCCAATCTACTTCTTTCAGGCTTTACCTCTGCTTTTCTTTGTTTAAATAAGTGGAGTA
GCGTGGAGACCTCTGAAAGAGAACTCTGAGGATATTATGTTCACTCCAATTCTACCTATTGAATTGGGTGATCTTTGTAA
ATCATTTAATTTTATTTATTCATCTGAA-GAAAGGGAGTACTCTTATTT-------------------------------
--------------------------------------------------------------------------------
--------------------------------------------------------------------------------
--------------------------------------------------------------------------------
--------------------------------CTCAAGAATTTTTGAAGGAGGAACAAACAGGCCAAAGTGATTTTTAAA
TTGTAACTGGTAATGAAATCTCCATATTGTGGTCATTGCTGTTTCTGTGGGTGTCTCTGGAAAGTGTGTGAGGGCGTGGG
AGGATTTTGTGTAGGTAGATGTGTTAGGAGGCGAGCACTTCTTCACTGGAAACCACATCTGGGGTTCCAAAGTTCAGCTA
TTGAAGAATTTCCAAATAATGGAAGGAAAATAA---TGAAACACT-----------------------------------
--------------------------------------------------------------------------------
------------------------GATAAA---GTTTT---------------AGTTGTCTATGG-AGAGACAGGGAA-G
TTTTTTT-TTTATATATTTATCAAACACTGTGCTTCTCTGTGTTCTAAACACTGAGGCTATAGCAGTAAA----------
------AAAACAAAAGTGCCTAATCTATGTGTAGATTATATTTTAGAAAGAAGAGGTGGACATTTAAAACTAGATAGTGA
TAATAGGCTGGGCATGGTAGCTCATGCCTGTAATCCCAGCACTTTGGGAGGCCGAGGCAGGCGGATCACCTGAGGTCAGG
AGTTCGAGACCAGCCTGGCCAACATAGTGAAACCCGTCTCTACTAAAAGTACAAAAATTAGCCGGGGGTGGTAACGTACA
CCTGTAATCCCAGCTACCGGGGAGGCTGAGGCAGGAGAATAGCTTGAACCCGCGAAGCGGAGATTGCAGTGAGCTGAGAT
TGCGCCACTTCACTCTAGCCTGGGCGACAGAGCAAGACTCTGTCTCAAAAAAAAAAAAAATAGTGATAATAAAAGAAAGA
TGGCAAATGTACACTGAATGATGAGTTTGTGGTTTTGCTGTACTTAAGTTTGTCTTAGCAGGCCCTTCTGATGAAGGAAC
ATGTAAGGAGAAAGTTGAAAAAA---GAATAAACGAAAGTCATGCAAATAGCAACAGGATGGTAATTCTAGGCTGAGTAA
TGAACAAGTGCAAAAGCCTTGAGGCATTAACAGCTTGCCCAGACCACTTTCAGCCATTTTCGGTTTCTCTTCCTCAACTT
CTTT-GTTCTTTGATATTGCAGTCTTGGCCAGTCTTTGATGTGTGTGCAATTAGAATGCTTTTTGTTTGTACCATTCTTA
TACCATCCCCTTTCAATCTTCTCAGCCATCCAGGGGTCTTTAACCA-GAAGAGAGAGGAGAGCCTCAGGAGTTAGGATGA
GAAGAAGCCAGGGAAGCAGTGCCATGGCTTCAAAAACCTTGCTTAACGTACAAAAGGAGGTGACCTGTCCCATCTGCCTG
GAGCTGTTGACAGAACCCTTGAGTCTAGGCTGTGGCCACAGCCTCTGCCGAGCCTGCATCACTGTGAGCAACAAGGAGGT
AGTGACCAGCCCGGGAGGAAAAAGCAGCTGTCCTGTGTGTGGTATCAGTTACTCATTTGAACATCTACAGGCTAATCAGC
ATCTGGCCAACATAGTGGAGATATTCAAGGAGATCAAGTTGAGCCCAGACAATGGGAAGAAGGGAGATCTCTGTGATCAT
CATGGAGAGAAACTCCTGCTCTTCTGTAAGGAGGATAGGAAAGTCATTTGCTGGCTTTGTGAGCGGTCTCAGGAGCACCG
TGGTCACCACACATTCCTCACGGAGGAAGTATTCAAGGAATGTCAGGTAGGGCCCTAGATGGAGGCAGATGGGGCAGAAG
ATGGTAGTTGGTGGAAAATCTCACCTTTTCATCCTTCTTTTTTTTTTTCTTTTTTTTTT-----GAGACAGAG-TCTCAC
TCTGTCGCCCAGGCTGGAGTGCAGTGGCGTGATCTCGGCTCACTGCAGCCTCTGCCCTCTGAGTTCAAGCGATTTTCCTG
CCTCAGCCTCCCAAGTAGCTGGGATTACAGGCGCCTGCCACCGCGCCCGGCAAATTTTTTTTTTTTT-------------
------------GTAGTTTTAGTAGAGACGGGATTTTACCATCTTGGCCGGGCTGGTCTTGAACTCCTAATCTTGTGATC
CACCCACCTCAGCCTCCCAAAGTGCTGGGATTACAGGCGTGAGCCACCATGCCCGGCCTTTTCTTTCTTTTTTTTTTTTT
TTT---GTGAGCAATAAAGCTTTTTAATCACCTGGGCGCAGGCGGGCTGAGTCTGAAAAAGGAGTCAGCCCTTTTCATCC
TTCTTTACCCCTTGTGGAACCATAATTCTGAGTCCTGTGATCTTCTCCATGTACATCTTTCACCCTATGCTCAGCTTCCA
ATGCCTGGGGTACATTCCTGTGTATTCCTTTCATTTACATACTAGACGATCCTAGAGTACAGTCTCTTAGCCAAGAGT--
-----------CTTGTTTTTTCCTTTTTCATTGTATAAGTGATACATTCCTTCCCAAAGTTAGCTCTCTTGCTTCTCTAA
GCAGGATAATTGCTAAGGAACATTGTGGATTGAACGAGGAAAGAGCATTGATAAGAGAAAAGGACTTTC-----TGCAGG
GTAAATACTTACTCTAAGGAAAGAGAGAATCAGGCTACTCCTCTTGA-GGGGTATTGATTTTCATCAC-AATGAGTAAAC
AATACATTCATCTCCTCAAATTTTTCCCCATGTCATAGATTCTAATCACCAGCTTCACAGTTTCTGTAAATTGCT-TTTT
TCTAGGATCAACTTGATTTTTTCCCTGTTTGTCCTCTATCCAGATACTAAGAAGGCTTATAGCTTGACTCTAGTGTGATT
CCCTTCTCATAGGAGAAACTCCAGGCAGTCCTCAAGAGGCTGAAGAAGGAGGAGGAGGAGGCTGAGAAGCTGGAAGCTGA
CATCAGAGAAGAGAAAACTTCCTGGAAGGCAAGAGGAGATTCTGAAGGATTTATGAGACAGGAATCTCGACAGGACCTTA
ATCCAAGGAGGCCTCGTCCTTTTTATTCCTTGACATTGCATGAGTCCCGAAGCCATTTGATTAGTTCTCTTCTCTGTCCT
GTCCCTGTTGGGGGTGGAGGCTAGAAAGTGGACATGTTACAATT-ACACACACATACCTGGAACTGAGCACAAAGATAGA
ATCTATGATGAGGAAGGCTAGCAAATA-----------------------------------------------CTGTGT
TCCATTGCTCTTTTCCAATGGGGCTCTACTACTGCCGGTGGAAGACACTACATAAAGGACTATGGTTTTCCTCAAGATTC
AAATTAGGAGTGTGGTAAGGCAGGCAGTCATGAATATCCAGGAAAGCTATCTAGAAGCTAAGCCTTAT---GTTTTACAT
ATTGTCTCAGGGTTGGCCTAGATAAGACGGTTTGAG-TCATTGTTTTGGTAAGTACTGAAAGGAAAATAGTAGGAAAAAA
TAGCTTCCCTCCAAGTACCTCTATTGTGGCCGGGTGTGGTGGCTCACGCTTGTAATCCCAGCACTTTGGGAGGCCGAGGC
GGGCGGATCACGAGATCAGGAGATCGAGACCACGGTGAAACCCCGTCTCTATTAAAAATACAAAAAATTAGCCGGGCGTG
GTGGCGGGCGCCTGTAGTCCCAGCTACTCGGAGAGGCTGAGGCAGGAGAATGGTGTGAACCCGGGAGGCGGAGCTCGCAG
TGAGCCGAGATTGCGTCACTGCACTCCAGCCTGGGTGACAGAGCGAGACTCCGTCTCAAAAAAAAAAAAAAAAAAAAATG
TACCTCTATTGCTTC----TACTCCCTTGCTGATTTGAACTCCCTGAAAAAAAAA-------TCTATATACAGATAATAC
AAATATATATATA------CAGATA-----------------ATACACACACACACACACACACACACACACA-------
-----------------------------------TATCCCCTTGCACAATAGGCCCTTAGCCTGACAAACTTACTACAT
CTCTTTCTTGTTCATCCTTGCAGTATCAGGTACAAACTGAGAGACAAAGGATACAAACAGAATTTGATCGGCTTAGAAGC
ATCCTAAATAGTGAGGAGCAGAGAGAGCTGCAAAGATTGGAAGAAGAGGAAAAGAAGACGCTGGATAAGTTTGCAGAGGC
TGAGGATGAGCTAGTTCAGCAGAAGCAGTTGGTGAGAGAGCTCATCTCAGATGTGGAGTGTCGGAGTCAGTGGTCAACAT
TGGAGCTGCTGCAGGTAAGAAGGTTGGCTCAATCTGAGATTCTGGGAACACAGTT---------CACTCCTGTGTCCTTG
CGTTCTCATCCTGGTGGTGACACTAAGGGGTTTCTTTGGCCTTGCAGTGCCGCCTTGTCATCCATTCTAGATGTCATGGA
CATGAATGA-------------------------CATTTTTATTAATTTATGAAGTAAGGGAATACATTTTACCTTGCAG
AGAAGATCCACGATATCTGGTTATAGTCTCTAGGCCCCTGTTATATGTGATCTAGTGTCAGGCATTCATCAGACTTCTCT
TTACTCGGATTAGTCACAGGTAAACACAT---GCATTTTCAGGTTTAAGAGCATACACATTTAAGAAATGTGTTCTATTT
AAGTTT--------------------------------------------------------------------------
--------------------------------------------------------------------------------
--------------------------------------------------------------------------------
--------------------------------------------------------------------------------
------------------------------------TTTGTTTGTTTGTTTGTTTTTGTTTGTTTGTTTTTTTGAGACGG
AGTCTCGCTCTGTCGCCCAGGCTGGAGTGCAGTTGTGCGATCTCGGCTCACTGCAAGCTCCGCCTCCCAGGTTCACGCCA
TTCTCCTGCCTCAGCCTCCGGAGTAGCTGGGACTAC-GGCGCCCGGCACCACACCTGGCTAATTTTTTTTGTATTTTTAG
TAGAGAAGGGATTTCACTGTGCTAGCCAGTATGGTCTCGATCTCCTGACCTTGTGATCCGCCTGCCTCGGCCTCCCAAAA
TGCTGGGATTACAGGCCTGAGCCACCGCGCCCAGCCCCCTGTTAATTTTTTTTAAACATAAAGTGATAGAATATTGAGCC
TTTTGGGGAGAGAGATGGACAAATATATAGACTGACAGTGCTTTCCTTTCTTTGAGGAATTTCCAAATATTTCCTTTTTA
AGATTTGGAAGGAAGCAGGAGAGTAACTGATTTTCATTTGTTGAATTGTTTCCTTTGACTCTGGTGCTTATATCCCAGCT
TTTTTTAAATTCCTTTTTCCTTTTGTCTTCTT-TTTTTGTTTAAATTTAAGATTACTCTGGAACAGAGGTTCCTAAACAT
ATTTTACACTCATTAGTATGGCTATAATAAAAAAA-GATGGAGAATACCAAGTGTTTGGGAAGATGTGAAGAAATTGAAA
CCTTCTTGAATTGCTAGTAGAGATGTAAAATA--GTAAAGCTACTTAGGAAAAACTGCTTGGCAGTTGCTCAGAAACGTA
AAGAGAGTTCTCA-TGCGGCCTAGCCATTCCATTCCTACCTATATACCTAGAAGAACTGAATACATTTATCTGTGCATAA
ACTTATATATGAAAGTTCACAGCAGTATTATTCATAAATAAAAACAACTCAAATCTCCTTAA-CTGATGAATGGATAAGC
AAAATGTGTTATATCCAAACAAT-----ATTGTTTAGCTATGAAAAATAATGAATTAATAATACATGTTATGACATGGAT
GCACCTTGAAAACAT------AATTGAAGGAAGGCAAACACAAAGTTCTTTTTCGTATGATTCCATTTATATGAA-----
-----AGTCTGTAAGTAGCAAATCCATAATATAGAAACTAGATTAGTGTTTGCCAGGGCTCTGGGGAAGAATTAATAGGA
AGTAATTGCTAATTAGTGTACAATTTCTATTTGTAGTGATGAAAATGATCTGGA-TTCACTGTGCAATGATGGTTGCACT
ACATTGTGAATATTTTAAAACCTGTTA-----------------------------------------------------
--------------------------------------------------------------------------------
--------------------------------------------------------------------------------
--------------------------------------------------------------------------------
------AATTGTGCACTGTAAAGGGCAAATCTT-ATGGTATTTGAACTACATCTCAGTAAAAACAAAAACGAAAAGGTTC
CATAGGCCCTTTTTTATGGTTCTTCCTTAAGCTCTTCAAAACCCTTGGAATCGCCACCTTCACAAAAGAACACTGTGTTT
ATGTCATTTGTCCAGGCATTTGTCCTATTTAAGTCAGTCTTAGTTGCTAT-TTGGTCACTTGGAATTTAAAAAAATTTTG
GTAGATCAAAAATTATAAATGCTGTGGGATTAACATTTCACTTCTAGATGTTAGCTTCAAAGAATGGCAAATGGAAAACT
AAGGAACTTATTCTTTTATCTGTGTGGGGACTTTGGCTATTCCTCTCCAATATGTTAAGATATAATCTGTTGGCCAGGCG
TGGTGGCTCATGCCTGTAATCCCAGCACTTTGGGAGGCCAAGGCGGGTGGTTCACGAGGTCAGGAGATCGAGATCATCCT
GGCTAACACAGTGAAACCCCATCTCTACTAAAAA-TACAAAAAATTAGCCAGGCATTTTATAATATACAAAAAATTAGCT
GGTGATGGCGGC--TGCCTGTAGTCTCAGCTACTCGGGAGGCTGAGGCAGGAGAATGGTGTGAACCCAAGAGGCGGAGCT
TGCAGTGAGCCAGGATGGCGCCACTGCACTCCAGCCTGGGCGACAGAGCGAGACTCAGTCTAAAAAAAAAAAAAAAAA--
-------GATATATGCTGTTGTATTTGTGGTATTTCTCCTCCACAATCCTATCTCCTGAGAGTCCCTGTAACAACTTTCT
TTCTATATGGATTCTCATGACGGCGATCGGGATGGATGGTGTTATCATATATCCATTGTTTGTTTGCTAGAGGGACTGAT
GTTC----------------------------------------------------------------------------
--------------------------------------------------------------------------------
--------------------------------------------------------------------------------
------------------------------------------------------------------------ACTGCGTG
AGAGCTACATTCAACACTTACTGCCAAAGAACGATCTAGACAGAAAGATGCTAAACTTGAAATTTGATGCAAAAATTAGA
TGAGATTTTAGGTTGTTTCCCTTATAAAAGAGATATTTTGATTTTTAATGCTTTCTGTAATAGTTTTATTATATTTGGCC
ATTTTTATTTTTGAAAGGATGGAATGGTAGGTAGCTAAATGAGGGAATGAAGATGGCAGTTATTATTATTT--AAATTTT
TTTTT-C-AGATTTTTTAAAATTTTAGGCCAGGCGCGGTGGCTCACGCTTGTAATCCCAGCACTTTGGGAGGCCGAGGCG
GGCGGATCACGAGGTCAGGAGATCGAGACCACGGTGAAACCCCGTCTCTACTAAAAATACAAAAAAAAAAAAAAATTAGC
CGGGCGTGGTGGCTGGCGCCCGTAGTCCCAGCTACTCGGAGAGGCTGAGACAGGAGAATGGCATGAACCCGGGAGGCGGA
GCTTGCAGTGAGCCAAGATCGTGCCACTGCACTCCAGCCTAGGTGGCAGAGCGAGACTCCGTCTCAAAAAAAA-------
--------------------------------------------------------------------------------
--------------------------------------------------------------------------------
--------------------------------------------------------------------------------
---------------------------------------------------------------AAAATTT-AGATTC-GG
GGGCACATTCAATTCAATGGCATTTAGTACATTCACATTGTTGTGCAACCATTA-GTGTGATCCCTCTCTGGACTTTTTC
GCCATCCCAAACTGAAACTGTACCCATTAAAAAACAGCTCCCCATTCCCTTTGGTCACCACTGTTCTACTTTGATAACCA
CTATTCTACTTTCTGTCTCTATGACTTTGCCTATTCTAAGTACCTCATATAAGTGGAATCATAGAATATTTGTCCTACAG
GTTTCTTATAAGGGTCTATTGCACAATGCTAGGGTTTGGGCTATATGGTACTCATTATTTTTGTCTCGTCAATATCCATT
CCCCGTTTTTCTGGTAATAACACCTGGAATTACTCTTGGAAGAAAGACTAGCATGTCTATTTCCATCCTTGTACTTGTTT
AGACCTGAGAAAATCAGCACTATCAAGGATGAATGAGTTAATTATATGTAAATCAGCGTATCCAATCCTTACATCCCTAC
CAGCCACACA----------------------------------------------------------------------
--------------------------------------------------------------------------------
--------------------------------------------------------------------------------
--------------------------------------------------------------------------------
-------------------GTGATTATTTTAGGTTGGACATCTGACCCAATCCTGAATGCTTGTGGGTGACAAAATTGTA
CTGTCATTGCAGTGAAGGGAAGTTGTCCTTTTTAGCAGAAAATAATATCAGTGAAGATAATTCAAATAAAGAGATTAAAG
TTGCTATCAACTAAAATCTGAGAATACAGTCAAAATATAGGGAAGAAATGAGAATTAATAGGCACGGAGAGGCCAGAATT
GTGACAGAGGTTTGAGCTTCCAGAGCCATCTGTGACTAAAGTAATACCTCTCTGGCCACAACCCTTACTTTCTTCCCAGT
TAAGGCAATTTTAGTTGTTGAACAACAAAACTATACTAATATAGAGAGCAAAACCATTTATTTGGTTGTACACCAGCTGG
TGTCATGAAAGAGT-AAAGCCAAATATATTGGTACATCTTGCTCAAAACAAATTAACCCATAGTGGTGATGATGGGGGAA
TGCAGGTGACTAACAGAAGTTAAGGATGGACTGGCTTGATAAAATGTTTTAGTGTCTGGGACAGGGACTGAGTGAATGTT
GATACCATTTTGACAGTACGCCACAAGAAAGGAAACAATATGGTTGGTGAATAGCTTATGTTTTAGATATTCTTAGTTAC
TGGTGCCCGTTTTTTCTTCTTTGTGGAATGTAGTATTGTACCTGTACAGAATGAAGTCTAGCTGCTTTTTTTCACCACAG
TCCAATGAGATGCAGACTGACTTGGAAAAGAAGGGAGTTTATTTTTGCAACTGGCTACGGGGAGAAGGTCAGAGTAACTT
ATCAGACCAACTCAGAGTTACAA-GTTTTTTTTT-CTGGTGCTTATATACATTTTAAGCTGTATGCCTTCACGTGGGAGT
GCACCTACAAGCAGGAGTGTTTCATTCAATCTATATCTATCTTTAACTAGGGTCTGGGGTTTAGAAAGCTTTCTCTAGAG
TCTTGGAAAGTTTCTTAATCTTAAATGGGCCCTGATACAAGTTGTATGTGTAAGAATGCTTTTATTATTCGATCAGACTT
TAGGGTATGAGAAAACCCAGGCAGGGTCTTTAAAGGGTTTGCTTTCGCATTTCAGCCCTGGTACTCAGGCA----CCAGC
TTTTCCAGTTCTTTAATGTTTAACTTAAGCATTCATCAAAATTATAGTAAAGGGTTAAGGGAAACTGATTGTTCTGGTTG
CTAATGGAAACCTGACCTGCCACAGTATTATAGAAACATGATTACAGACAAAAGACAATGATTAGATATGTAAAGGTTGA
CAAAAAAACAGCACCTATGTGTGAGCTAAAATTAAGATTGGAGGCCGGGCGCGGTGGCTCACACCTGTAATCCCAGCACT
TTGGGAGACCAAGGCGGGCAGATCATGAGGTCAGGAGATCAAGACCATCTTGGCTAACACAGTGAAACCCCGTCTCTACT
AAAAATACAAAAAA-TTATCCGGGCATGGTGGCACATGCCTTTAGTCCCAGGTACTTGGGAGGCTGAGGCAGGAGAATCG
CTTGAACTGGGGAGGTGGAGGTTGCAGTGAGCCGAGGTTGCACCACTGCACTCCAGCCTGGGTGACAGAGTGAGACTCTA
TTTCAAAACAAAAAAAAAA-------------GATTGGAAGAGGTTACCTATAGGCGGTGGATAGAACAGGACTTTTCTG
TCTGTACATAAGACCATATCATCTGTAAAAAGAGATAGATTTACTACTTTCTTTCCAATATAGAAGCTTTTTTAAAAATT
ATTTTTTATTGGTACTTAATAAGTATACATATTTATAGGGTACGTAGATTTTGGCACAAGT--ATACAATGCATAATAAT
TACATCAGTACATCAGAGTAAATGATGTAT--CCATCACCTCAAGCATTTATCATTTCTTTGTGTTACCAACATTCAGAT
TATACTATTTTAATTATTTTAAATGCATAATAAATGATTGTTGACTACAGTCACCCTGTTGTGGTATCAAATACTAAATC
TTATTCATTCTATCTAACTGCCAACATAGAGCCTTTTATTTGTTTTCTGTGACTAACTGCCCTGACTAGAACCTCCAATA
CTATGTTAAATAGAAGTAGTGAGAGCAAACATCCTTGTCTTTTCTGATCTTTGGGAAAAAGCATTCAGTTTTTCACCACA
AAGTATGATATTAGCTGTAGGTTTTTCATAGATGTGTTTTATCAGGCTGAGGGACCTCTCTTCTACTCCAAGTTTGTTAC
CATTCCTGTTTTTTTTTTTTGTTTTTTTTTATGAAAGTGTGCTGAATTTTGCTGAATGCTTTTTTTT-CATGTCTATTGA
GATCATCATGTGGTTTTTATCCTTTATTTTATTAATATGGTATATTACATCAATTGATTTTTTTTTTATGTTGAACCAAC
CTTGCATTTCTCA-ATAAATTCTACTTGGCCATCAGGTATAATCTTTTTGCTGGATTGCCAGATTTGATTTTCTTGTATT
TTTGTTGAAGAATTTTGTATTTATATTTATAAGAGATATTGGCCTATGGTTTTCTTTTCTTGTGATGTCTTTGGTTCTTT
TATCAGGCTTCTTTTATCAGGGTAGGATGAGCCTCATGTAATCAATTAGGAAGTGTTCCCTACTCTTCTATATTTTTGAA
ATAATTTATGAAGTTTTGATATTATTTCTTTTTAAACCTTTAGTAGAATTCACCAGTGAAGCCATCTGGGTGAGGCCTTT
TCTCTGTAGGAGGTCTTTGAATTCCAACTTAATCTCTTAACATGTTTTAGGCCTATTCATATTTTCTGTGTGTTCTTTAA
TGAGTATTGATAGTTTCTGTATTTCTAGGAATTTGTCTGTTTCATTA------TCTAATTTGTTGGCATACAGTTCTTCA
TCA-TTTTATAATCCTTTTAATTTCCATAAGGTCAGTAGTAATATCCCATCTTTCATTCCTGACTTTTTTT--CTTGGTG
TGACTAGCTAAATGTTTGCCAATTTTGTTGACATTTTCATATAACTCACTTCTGATTTTTCCATTTTTTTTTTCTACTGT
TCTTCTTTCTTTCATTAGTCTTACACCAGTCTTTATACACTTTGACTCATGTTTTCTCTTTTCTTTCTAGGACATGAGTG
GAATCATGAAATGGTGCGTATGGGTGGCCAGGAGTGGTGCTTGTGAGTTATAAAGAAGTGTTTGTAGCTATTAGAGTTAT
TTGCTGGTCAATTGGAATAAAAAA-TCTCCCAGAGTAGTAAAATGTGGATGTATCGTTATCTTAAATTGCTGGTCCCCGA
TGAGTATTTGAGTGTTCCATAAC---TATTAATGGACTCCATCCTATGGTAGTAAATTCAGTGGTTGAAGTTCAGAGCTA
CAGCCAAAAAGTATATAAAGGATGAGAGCTTTTACTGTCAGACTTCGGTGACTTCACTCATTTAATTCATCCTCTGTCCC
TGCATCCAGCCCTGGATCTTTTATTTTATATGTGTTTGTCATA-CACATGGAGGGCCTTGTCAAATCTTAAAATAGGGCA
TGAAGACAGCTCCTTTATATTTACTTTGCTTACTTAGAAATAGAAGGTACCGGATCATTATGCAAGGTT-----------
--------------------------------------------------------------------------------
--------------------------------------------------------------------------------
--------------------------------------------------------------------------------
--------------------------------------------------------------------------------
--------------------------------------------------------------------------------
--------------------------------------------------------------------------------
--------------------------------------------------------------------------------
--------------------------------------------------------------------------------
--------------------------------------------------------------------------------
-----------------------------------------------------CTCTTTAGATTTCCAAAAGTAGACTCA
AGCCTCAGGACGGTAGCTGTGACTCTGGTGATGATAATTAATCTCTGCCTGTTCACACACTTTAGAAGCTCCTGTGGAAA
AGTGTAGTCCTTGTTCCTTGTGTCTACCATTGCCAACCCACTTGGAAACATCAAGTTTCTTACAAAGACATAAAATTCTA
ACCAATTTTAATTAGGTTGTCATAACTTCTCCTTTGCCAAGTGTTTGTGTTTCCCAG-GAATCTGAAATCTCAAATATGG
GCCATTCCACTGGAGTTCAGGCTTTGAACTCAGGCATAGGCTCACAGGATTTCCTTATAGAGCCCCATATCACAGTCAGG
ATCTACAGCT----------------CAGAATACTACATCTCTGGCCCCTCCCAGAAGACCCACTGAGATGCAGTGAGTT
TTCCACATATCACATACCATTTCTACAGGTAGCAAAGTCTTTTCCTATCTATTGTTTTATCCAATATTTTATTATTTCCA
TTAGATAGCAAAGGAGAGTTTAATTATTTCATTTTT--AAGAAAGAAACTGTGCTTTCAAGAAATGAAGACCTTCTCAAG
GTCACCCAGAGGATAAGAGGGAAAATAGACACAGTCACATTTCTTCTGGATCCAGGGTCTGGCTCTCCCTTCTCCCCCTC
CTCAGGCTCAGGGAGAAGGGTTCAAGTGCATCAGTGATGTGAAGGAGATGAAACCAGTGATGTGGGAGGGATGGACACAG
GATGAGAGATGTGGGGGTCAAAAAATTTTTTTCATCCCTAGGAGTGAGATCTGGAGGCTGAAAAAGCCAAAAACGGTTTC
CAAGAAACTGAAGACTGTATTCCATGCTCCAGATCTGAGTAGGATGCTGCAAATGTTTAGAGGTGAGGAGAAGCAGGCAA
AGACTGTGGATGTGGGATTGTTGTGGTGTCAGATAATAAACTGTCTAGGTGGGATAACTTAAAATTGAGGACAGAAGAGA
GGAGGGAGGTCAGAGAATAAGGAATATTCTGTGATGAAGAGGATGCATTTATATGTAAGGAAAAATGGCTAGGTCTCCGG
TTTATCTTTT-AGTTCACTAGCTCACAGCTTCATGGTATTCCCTTCCCCTGTCCCTACTCTAAAGAATGGATAGGTATCA
GTGCTTACTCCTTTGTTTCTAATCAGCATCACTGAATCTTTTATTATTTCAGAACTGACAGCTGTCCGGTGCTACTGGGG
TAAGAAAAAGTTACAGTCTTTAAATAACTGTTTTCCAATTACCTTTCAGAAGTTTATGG-------TTTCAATGATATCT
TCTGATCTTAGCCTCATGCGTTCTCAGCACCTCCCAAAACATTTGCTAAACACATTTCTCCAGTGTTTTACCCC-TCC--
-AATT-CATCAACGCAAGTTTTTCAGTCACTTCCCAAGTTCCTTCATCACAATGTCACTAGATAAACCTACTCCAT-ATC
TGTCACCTAATCTTATATATCACATAGATTATTATATTCATATACATACATA-TATATA---------------------
---------------TTTTTTTTCTTGCAGTGGATGTCACACTGAATTCAGTCAACCTAAATTTGAATCTTGTCCTTTCA
GAAGATCAGAGACAAGTGATATCTGTGCCAATTTGGCCTTTTCAGTGTTATAATTATGGTGTCTTGGGATCCCAATATTT
CTCCTCTGGGAAACATTACTGGGAAGTGGATGTGTCCAAGAAAACTGCCTGGATCCTGGGGGTATACTGTAGAACATATT
CCCGCAATATAAAGTATGTTGTTAGAAGATGTGCAAATCATCAAAATCTTTACTCCAAATACAGACCTCTATTTGGCTAC
TGGGTTATAGGGTTACAGAATAAATGTAAGTATAGTGTCTTTGAGGAGTCTTTGTCCTCTGATCCCGAGGTTTTGACTCT
CTCCATGGCTGTGCCTCCCTGCCGTGTTGGGGTTTTCCTAGACTATGAAGCAGGCATTGTCTCATTTTTCAATGTCACAA
GCTATGGCTCCCTCATTTACAAGTTCTCTAAATGTTGCNNNNNNNNNNNNNNNNNNNNNNNNNNNNNNNNNNNNNNNNNN
NNNNNNNNNNNNNNNNNNNNNNNNNNNNNNNNNNNNNNNNNNNNNNNNNNNNNNNNNNNNNNNNNNNNNNNNNNNNNNNN
NNNNNNNNNNNNNNNNNNNNNNNNNNNNNNNNNNNNNNNNNNNNNNNNNNNNNNNNNNNNNNNNNNNNNNNNNNNNNNNN
NNNNNNNNNNNNNNNNNNNNTGGCTTGAGTTATGAGAGATGCTTATTTATACATTTATTCTTTTTCATATTTTCAGAGAC
AGTTACCTAATCCCTCCTAAAGACAAAGCAGTATGGGTATAACATCCTTGCCTTCCCATTTATCTGTGTTTCGCTTTATC
ACTGATGTGAAGAGGCCCAAAGCCTGTTAGCCACCATCCATGCTATCTAGGTAGTCCATAGGAACCACCCCCAAGACCAC
CACCAACATCAACTAAAGATTCTTGGAGGGTATGTCAGTGTGTTGCTCAGGATACCCCAGGTACATCAAGGAATCAAGGA
GAGGAAAATATGAGCAATATGTGTATTCAGAGTGAAGATTTTATGTCCAGAGTATTTGAGCTCAAACCTTGTCTCTTGTT
TTCTAATTATGATGAATACTTTCTCAGTTTCTTTTTCCTGAAATATAAATTGGGATTTAAG-------------------
---------------------------------ACTGTACCTAACTATTAAGATCACTGTGTAAAACTAAGTGTCTCTAA
ATGTAATGCATCGATTTAGTGTCTGGAACATAATAAATATTTGCTCTCATGATTACTAAAAA
>Macaca_mulatta_TRIM34
ACCCTGGCTTTTCTTCACGTCTTCAACCAGGAGCCGAGATTTCTGTTGGTCTGAAGGTGTGTGGGGAGGTTTGTTGGGGG
GTAGAAGGTATGAGATTCAAGGAGAAAAGTTCTCAATGAAGTTAGGATAATTTGATTTATGGCCCCAAGGCTGCCCTGCT
CTGTCGGGAGCAAAGGCTGGCTTGCAGGCTTCCTGCTTTGAGTGCGCACTGAT------------AGCAGCCTAGAGTCT
GGGGAGGGACAGCCTTGAAAGCAGTGTTAAAGAGGCAGAAGGCCGCCTTTGTTTTCTGGAGTGTCTT-TTTTTT------
-CTCCAGGCTGAATCCAGTTCCATTGCCTTCCTATTGTATAATTTTGATTTTCTACCTTGCAAAGGAAACTGAATTCTCT
CTCTCTC---TTTCTCTCTCTCTCTCTCTT----------------------------------------------AAAG
AGATGAACAGAAGATCTCTTATTTTCCACGCCC--CTCCCTCCTCAAAAGAGAAGTTGGTGAGAGGAGGTCTCTGTTTTT
CAAGTGTGTGCAGGGCTTAGCTCCTAGTATGCAGCATCAGATAGAATGGAGCCA---TGGGGGCATGGCCAGGGGGAATA
TTGAAGCGGGTTCTTTCGCTGCCCTCCTGGCAACCACTAAGCGGCTTTCTGAGGCCATCCTCACGTATTCTTAGTCCTTG
GCCTGCCTGACTATAGCAGGTTGAGTGATCTGACTGCTGCACGCTGCTGTGTTCCCTCTTATCCTGTGTCTTTCTGCAGG
TCATCTCAGGGCTCTCCTTGCACATCCCTGAACATAC-TG----------------------------------------
--------------------------------------------------------------------------------
--------------------------------------------------------------------------------
--------------------------------------------------------------------------------
--------------------------------------------------------------------------------
--------------------------------------------------------------------------------
-----------------------------------------------------TTTACTTTTACTTCAGTAACCCATGTG
CCACCAGCGTCTTCGCCTGTCTCAGAACTCGTTCCTCATCATTCTTCCTCTTNNNNNNNNNNNNNNNNNNNNNNNNNNNN
NNNNNNNNNNNNNNNNNNNNNNNNNNNNNNNNNNNNNNNNNNNNNNNNNNNNNNNNNNNNNNNNNNNNNNNNNNNNNNNN
NNNNNNNNNNNNNNGCCTGTAGTCCCAGCTACTCAGGAGGCTGAGGCAGGAGAATGGCGTGAACCCGGGAGGCAGAGCTT
GCAGTGAGCCGAGATCTGGCCACTGCACTCCAGCCTGGGCGGCAGAGCGAGACTCCGTCTCAAAAAAAAAAAAAAAAGAA
TTTGACATA-CAGTATGTCCTATCTTAAGCTCACTTGCGAGCAATTTG----CACCTTGATTGATATGTTACAGATATTC
CGACACATGCCATTCTGGCCTCTGCTCTCACCCCTCAGAGTTCACTGAAACTGCCATCCT----------------CCTG
GGGAGAATCCATGTCTGCCTACATACTGACTGTCTCCCAGAGGCGTCTAGCCAGGCACGAGGCCCAA-TATATGGGATAA
TATTGATGATAAAGCAGGCTGCTGATGTAAAAATGTGCAATTAGCATCCATTCAGCATTCAGAAAAT----ATGAAATAT
ACGTGGAAGCCTACATTCTAATTAGACAGCAATCATAGACCATATCAATGAATGATAGAGTACACAAGAAGATAACTAAT
ACTATGGAGTAACATCTTT-------------------------------------------------------------
--------------------------------------------------------------------------------
--------------------------------------------------------------------------------
--------------------------------------------------------------------------------
--------------------------------------------------------------------------------
--------------------------------------------------------------------------------
--------------------------------------------------------------------------------
--------------------------------------------------------------------------------
---AAGAAGTTAAATTAGGATAAGGACTCTGTAAAGACCTCATAAAGGCCTTG---------------------------
--------------------------------------------------------------------------------
--------------------------------------------------------------------------------
---------------------------------------------------------------------CAACTTTAAAT
AGTTTTTATGAAAGTTTTAAATAGTTTTCATTGTAAGAAGAACACTTTTGAATAGAATCTTAAGAAT---GTGAGGAAAT
TAAAGCCTTTAA-TGGCTTTTCCC-TGCACTTAAAAGGAGAACAGTGTGGATACGGAAGGTTGAGATGGGAGTTTGCAGG
GAGAGGAATAAAAGATGAGCTCTGGCCAGAAGTGGTGGCTCATGCTTGTAATCCCAGCACTTTGGGAGGACAAGGAGGGA
GGATCACCAGAGATCAGGAGTTCAAGACCAGCCTGGCCAACGTGGTGAAACCCTTTCTCTACTAAAAAAATGCAAAAATT
AGCTGGGCATGGTGGTGGATGTCTGTAGTCCCAGCTACTTGGGAGGCTAATGCAGGAGAATCGCTTGAAGCCGGGAGGTG
GAGGTTGC-------CAAGATCTTGCCATTGCGCTCCAGTCTTCCAGCCTGGGGGACAAGAGTAAGAC--TGTCTCAAAA
AAAAAAAAAAAAA--------GGGTGAGCTCTGAGGATTGAGGCAATGGGAAGGGATGTGTGATGCGGACCTAACTGGAC
CATTGTGAAGTCTGGCCTCACTCTGGATGGCATGGGTGGGAACAGAAGAGTGACATGAT---TGACATCT-GCTTTAAGG
TGATCACTCTATCTACTGATGTAAGAACAAAGATGAGAGCAGAGTGAAGAAGGGCAATCATGGCTGGGCACAGTAGCTCA
TGCCTATAATCCTAGCACTGTGGGAGGCCAAGGCAGGTGGATCACTTGAGGTGGATCATGAGTTTGAGACCACCCTGGCC
AAGATGGTGAAACTCTGTCTCTACTAAAAATACAAAAATTAGCCAGCCGTGGTAGCAGGCACCTGTAATCCCAGCTACGT
GGGAGGCTGAGGCAAGAGAATCACTTGAACCCGGCAGGCAGAGGTTGCAGTGAGCCGAGATCACGCCACCACACTACAAC
CTGGCTAACAACAGCGAAACTCTGTCTCAAAAAAAAAAA----------------GGAAGGGCAATGATAGTATCAGCAA
GACTAGTTGAAGAACAATTTCCCGAATTCAGGTGGTTTCTACCGGAGTGGTGGCAGTTGAGGTGGTTGGAA-CTAATTTG
AAAAAAAAAAAAAA----CTCTTTCAGCATTTTCTCACGAAGTAACAGACAGAAAAAGACTAGATTAGGGGTTGCTTAAT
GAAAATGATTCTATGTTAAAAAAAAAAAAAAAAAAAA---CTTTTGGGAAATATATTGACCAGAACACTACAGCTCTTGG
GGAGAGAGTCACTAATGTGGTATAGATTGAGCCCTGGACTCTAAGGAGTAGCTGAAGCAAGAACTCAGTACATAGAGGAA
TGGGGAGGAGATGTTACGATGTTTCTGAGCTCTCCAGGCCTCTGGATGTCAAAACAGGCTCTACTTTCCTTATTGGCAGT
TTCTGACCAAGGAACCAGAAGAAGTGTCTAGGATATTGTCTAGAAACTTCAAAAGACATCCTCCCC-TAAAAGTCACTCT
TAGACACACTCTAATTTTACTATCTA-CCTGCAAAGAGACTTA-AAGTTTGCATTATCATATCCAGATGTTAGGAGTCCA
GATGTTAGGAGAAGACTCAAAAGAAGGGTACAATCACCTGGCAGCTATGGTAACCAGTTAACCTGGGAGTTCTGTCAGGC
GCATGGCACTCATGTTCCCTTCTCTACCTCCCTGACTGCTGCTG---GGCTTGAGCCACACTGGGAAGTGGTGGCGTCAT
TTCTCACACGTGGGACCCTGGT-CCTCTGCACTTTTCTCATTCTTTTGTCATTATAGTGGCAGCAGCTTTGGCATCAACA
TGCAGCCTCACTGTGAACATGAAGTCACAGCCCGTGGCAGAATGCATGTTCTACTGCTTCCTCTCCTGGAGTCCCCCAGT
ATTTCTAACTATTAGTTGGATACTGATTGGAATAAAAGATAACAAAGAACCCCACATCTGTGGTTGGCTCATA-GCTTTA
GCTATAAACAGGGGTGAATATTATCATATCATGTAAACTCCTGGTCTTACTAGTCATCAGATCCTGGTCTGACCAATGGT
CATTGCAGCCAGGGG-CTACGAGTATATCTCTTTTGTATGATTTTTAGTATCTGTACCATTGGCTGGATGACATTCACCA
GCCTACTTTCAGCCTTTTTTCCTCCTTAAGGTCTTTTGATGGATGGTTAGAGGAATAGACAGGTCTCGAGGCCTAGATTT
ATCTCCATACAGCTTTTTATCGTACCCCATCCTTTTGCCAAGCGTAGGAAAGATTCCTAGGTTGTCACACAT-CACAGAT
CTTTCTTTC----ACTATCAAACCTGTTCAATTATATTAGTTTTCTAGCACTGTTGTAACCAATTATCACAAACTAGATG
ACTTAAAACAATAGGAAT--------------------------CTGTATCACAGCTCAGGAGTC-AGAAGTCCAAAAGC
AAGATGGTGGCAAACTTGATTTTTTT----CAGAAGGCTCTATGTGAAAATGGGTTCTATTCCTCTCCCCTAGCTTCTGG
TGGTTTCTAGCAAACCTTGGCATTCTTTGGCTTATATCTGTGCTACTTCCGTCTCTGTCTCTATTGTCACATGGCTTTCT
TTCCCGTGTGTTTGTATGTCCTCTCCTCTT---ATAAAAACACAGGTCAAGGCCGGGTGCAGTGGCTCATGCCTGTAATC
CCAGCACTTTGGGAGGCTGAGGCAGGTGGATCACCTGAGGTCAGGAGATCGAGACCAGCCTGGCCAACATGGTGAAACCC
CATCTCTACTAAAAATATAAAAA-TTAGCTGGGCGTGGTGGCATATGCCTGTAATCCCAGCTAGTCAGGAGACTGAGGCA
GGAGAATCGCTTGAACCTGGGAGGCGGGGGTTGCAGTGAGCTGAAATCACGCCATTGTACTCCAGCCTGGGCGACAGAGC
-AAAACTCCATCTCAAAAAAA--GAAAAAAAACACAGATCTTTAAATTTAGGGCTTGTCTTTATCCAGTATGACCTCATC
TTAACTTGA------TTACACCTGCAAAGATGTAGTTTTCAAATAAGGTCATATTCATAGAAGCAAATATATTTTTGTGA
AGGGTATAATTCTATCTACTAGAACAAGTATCAAAATGTTACTTACTGCCTACTGAGAGCCACCCTTTTCCCCTTTGCCT
CACAGTTTCTTGTCTAAACTGACCTCAGGTTCTGAGAATTGGCATTGTATCATCATGCCACTACTCTGTGGTGC-ACCCT
CTGGCTGACCACAAGCAATAATTGCAGGTTTCTTTTGCCATTTGCACTCATGCAGCTTAACTCCACAGGGGGAATACAGG
ACAGGAGATATAGCATGCAGGCAGG----GCTGCTTCAGGTAAGCTCTCAGTGAGGATTTCTTTTTTTTTTTTTTTTT--
--AGACAGAGTCTCGCTCTGTTGCCCAGGCTGGAGTGCAGTGGCGCCATCTCGGCTCACTGCAAGCTCTGCCTCCCCTGT
TCACGCCATTCTCCTGCCTCAGCCTCCCGAGTAGCTGGGACTACAGGTGCCCACCACCATGCCTGGCTAATTTTTGTATT
TTTAGTAGAGACGGGGTTTCACCTTGTTAGCCAGGATGGTCTCGATCTCCTGACCTCGTGATCTGCCAGCCTCAGCCTCC
CAAGGTGCTGGGATTACAGGTGTGAGCCACCGCGCCGGGCCTCAGTGAGGATTCTTATGTTGGTACAAGACCATGTG---
-----GATGTGTGTGAAACTAACATAGCTTAGGTAAATCTTACATCAACAGACTGATTCCCTTGTAAAGACCATGAACAT
AGCTTCCAGGGCCCTACAGAGAATATTTTGTTACAAGAGTCTCAGACCTGTTACAGAAGATGAGGTCTGTGCTTACCAAA
A---------------AAATAAAAATGAAATAATATGCCAGGGGATGGTGATGGGGATGTCTTTTTTATAGGAAGGAAGG
ACTT-AAGCCTAATGATATCCCTTTTTTCCCCCACATGTCTAGTCTGACTTCCAATCTTATCTCCTTTACCTCACCCTAT
TTCCCACCCTCATCTGCTTCTCTCTATTTCTTCTGTTAACTTGTCCTGCATCTTCCCATCCCTGCCCTTACCTCCTATTC
ATTGGAAAGAGACTGTCACTTTTACTTCATTTAGGAAGTGTCACATATCCAGGTTCCTCTAGGCTCATGTGATGCCAAGG
-CCTAGGGCTTTTTGCATACCAACCACACATTTAAAAACTTTCGAAGATGTTATGATGCTACATCCTCCATGAAC----G
GGGCATTCACTTACATAACTCCTTCTACCTAAAATATTTGGTTTCTTTCTCATTCTGTGTTCCTTTCTCTTTATTCAGCT
TTCATT-AAACTCTTGCTTATCCA-GCAAGATATCTTGGATTGTTCTCTACTTAGCAAATTATTTG-TTTTCTAAAAACC
TATACCTCTCTATGATGGT------------------------------TACTATTTCACACTTTATGAATGATTATATA
ATTAGCTTCTATCTTATTTAGGTGACTATTTACTTTATTCTGGCTAATACCATCTGTTCAT-ACTCAACTTTGAATTTTA
ATCCATTTCCTAGATTTTAATCATGGAAGATAATATGTCTTCAGTGAGAATTTCCAAAATAAACACAGGAATAATTGGCA
TTCAATTAGTGGATGTGGATTTAACACAGACAGAA---CTTCATTGCTCCTAAATGTAGTCTCCCGTTATATATTGGGAC
ATCTCTCCCATGACCAACAGCCATCTCCTTGGTATTTCTATTCCTCAATGATCTGACATTGGTATGAATCTGTGATCTAT
GTGTAATTCAGCTGGTTACACCCCCTCCCCCAACAAATACACACCTTTTGGTTCCTATCAACCTCTATAACATCCTT-CA
TGCCAAGATGAAATC----CTACCATCTACAAACACAAGACCCCCT-AGAAATTCCCAGCTTATGTGGTTTCCTCCATTT
CTACACCCTCATAACACTGGATCCCAATCTACTTCTTTCAGGCTTTACCTCTGCTTTTCTTTGTTTAAATAAGTGGAGTA
GCATGGAGACCTCCGAAAGAGAACTCTGAGGATATTATGTTCACTCCAATTCTACCTATTGAATTGGATGATCTTTGTAA
GTCATTTAATTTTATTTATTCATCTGAA-GAAAGGGAGTACTCTTATTT-------------------------------
--------------------------------------------------------------------------------
--------------------------------------------------------------------------------
--------------------------------------------------------------------------------
--------------------------------CTTAAGAATTTTTGAAGGAGGAACAAATAGGCCAAAGTGATTTTTAAA
TTGTAACTGGTAATGAAATCTCCATATTGTGGTCATTGCTGTTTCTGTGGGTATCTCTGGAAAGTGTGTGAGGGCATGGG
AGGATTTTGTGTGGGTGGATGTGTTAGAAGGTGAGCACTTCTTCACTGGAAACCACATCTGGGGTTCCAAAGTTCAGCTA
TTGAAGAATTTCCAAATAATGG---GAA-AGAAAAATGAAACACT-----------------------------------
--------------------------------------------------------------------------------
------------------------GATAAA---GTTTT---------------AGTCGTCTATGG-AGAGACAGGGA---
TTTTTTTATATATATATTTATCAAACATTGTGCTTCTCTATGTTCTAAACACTGAGGCTATAGCAGTAAA----------
------AAAACAGAAGTGCCTAATCTATGTGTAGATTATATTTTAGAAAGAAGACGTAGACATTTTAAAATAGATAGTGA
TAATA---------------------------------------------------------------------------
--------------------------------------------------------------------------------
--------------------------------------------------------------------------------
-----------------------------------------------------------------------AGAGAAAGA
TGGCAAATGTACATTGAATGATGAGTTTGTGGTTGTGCTGTAGTTAAGTTTGTCTTATCAGGCCCTTCTG-TGAAGGGAC
ATGTAAGGAGAAAGTTGAAAAAT---GTATAAATGAAAGTTATGCAAATAGCAACAGGAGGGTAATTCTAGGCTGAGTAA
TGAACAAGTGCAAAAGCCTTGAGGCATTAACAGCTTGCCCAGACCACTTTCAGCCATTTTTGGTTTCTCTTCCTCATCTT
T----GTTCTTTGATGTTGCAGTTTTGGCCAGTCTTTGATGTGTGCGCAATTAGAATGCATTTTATTTGTACCATTCTTA
TACCAT--TCTTTCAATCTTCTCGGCCATCCAGGGGTCTTTAACCA-GAAGAGAGAGGACAGCCTCAGGAGTTAGGACCA
GAAGAAGCCAGGAAAGCAGTGCAATGGCTTCAAAAATCTTGCTTAATGTGCAAGAGGAGGTCACTTGTCCCATCTGCCTC
GAGCTGTTGACAGAACCCTTGAGTCTAGGCTGTGGCCACAGCCTCTGCCGAGCCTGCATCACTGTGACCAACAAGGAGGC
AGTGACCAGCCCAGGAGGAAAAAGCAGCTGTCCTGTGTGTGGTACCAGTTACTCATTTGAAAACCTACAAACTAATCGGC
ATCTGACCAACATAGTGGAGAGACTCAAGGAGGTCAAGTTGAGTTCAGACAATGGGAAGAAGAGAGATCTCTGTGATCAT
CATGGAGAGAAACTCCTACTCTTCTGTAAGGAGGACAGGAAAGTCATTTGCTGGCTTTGTGAGCGGTCTCAGGAGCACCG
TGGTCACCACACAGTCCTCACGGAGGAATTATTCAAGGAATGTCAGGTAGGGCCCTAGATGGAGGGAGTTGGGGCAGAAG
ATGGTAGTTGGTGGAAAGTCTCACCCTTTCATCCTTCTTTTTTTGTTTGTTTGTTTTTTTTTTTGAGAAAAAAAAGTCAC
-CTGTCACCCAGGCTGGAGTGCAGTCGTGTGATCTCTACTCACTGCAACCTCCGCCCTCCGAGTTCAAGCGATTCTTCTG
CCTCAGCCTCCCGAGCAGTTAGGATTATAGGCACCTGCCACCACGCCCAGCTATTTTT--------------GTTTGTTT
GTTTGTTT------GTTTTTAGTAGAGACGGAGTTTCACCATTTTGGCCAGGCTGGTCTTAAACTCCTAATCTCATAATC
CACCCACCTCGGCCTCCCAAAGTGCTGGGATTACAGGCGTAAACCACCGCCCCCAGCCTTTTTTTTTTTTTTT-------
------GTGAGCAATAAAGGTTTTTAATCACCTGGGTGCGGGCAGACTAAGTCAGAAAAAGGAGCCAGCCCTTTTCATCC
TTCTTTACCCCTTGTGGAACCATAATTTTGAGTCCCTTGATCATCTCCATGTATATCTTTCACCCTGTGCTCAGCTTCCA
ATGCCTGGGGTACATTCCTGCGTATTCCTTTCATTTACATAACAGATGATCCTAGAGTACAGTCTCTTAGCCTAGAGTGA
GAGATTTTTGTTTTGTTTTTTCCTTTTTCATTGTATAGGTGATAAGCTCCTTCCCAAAGTTAGCTCTCTTGCTTCTCTAA
GCAGGATAATTGCTCAGGAACATTGTGGATTGAACGAGGAAAGAGCATTGATAAGAGGAAAGGACTTTCCTTTCTGCAGG
GTAAATACTTACTCTAAGGAAAGAGAGAATCAGGCTGCTCCTTTTGA-GGGGTATTGATTTTCATCAC-AATGAATAAAC
GATACATTCATCTCCTCAAATTTTTCCCCATGTCATAGATTCTAATCACCAGCTTCACAGTTTCTGTAAATTGATTTTTT
TCTGGCATCAACTTGATTTTTTCTCTGTT-GTCCTCTATCCAGATACTGAGAAAGCTTATAGCTTGACTCTAGTGTGATT
CCCTTCTCCTAGGGGAAACTCCAGGCAGTCCTCAAGAGGCTGAAGAAGGAGGAACAGGAAGCTGAGAAGCTAGAAGCTGA
CATCAGAGAAGAGAAAACTTCCTGGAAGGCAAGAGGAGACTCTGAAGGATTTCTGAGACAGGAATCTTGACAGGACCTTA
ATCCGAGGGGGCCTCATCCTTTT-ATTCCTTGACATTGCATGAGTCCTGAAGCCATTTGATTAGTTCTCTTCTCTGTCCT
TTCCCTGTTGGGGGTGGAGGCTAGAAAGTGGACATGTTACAATT-ACACACACATAC-TGGAACTAAGCACAAAGATGGA
CTCTATGATGAGGAAGGCTAGCAAATA-----------------------------------------------CTGTGT
TCCATTGCTCTTTTCCTATGAGGCTCTACTACTTCTGGTGAAAGACACTATATAAAGGACTACAGTTTTCCTCAAGATTC
AAATTAGGAGTGTGGTAAGGCAGGCAGTCATGAATATCCAGGAAAGCGGTCTAGAAGCTAAGCCTTAT---GTTTTACAT
TTTGTCTGAGGGTTAGCCTAGATAAGACAGTTTGAGGTCATTGTTTTGGCAAGTACTGAAAGGAAAATAGTAGGAAAAAA
TAGCTTCCCTCTAAGTACCTCTATTG------------------------------------------------------
--------------------------------------------------------------------------------
--------------------------------------------------------------------------------
--------------------------------------------------------------------------------
-----------CTTC----TACTCC-TTGCTGATTTGAACTCCCTGGAAAAAAAAA------TCTATATATAGATAATAT
AGGTATATATATATA----CAGATA-----------ATATAAATA--CACACACAC------GTGTGTGTGTGTGTGTGT
GTGTGTGTGTGTGTGTGTATTTCCCTACTGCCTCCTAATCCCTTGCACAATAGGCCCTTAGCCTGACAAACTTATTACAT
CTCTCTCTTGTCCATCCTTGCAGTATCAGGTACAAACTGAGAGACAAAGGATACAAACAGAATTTGATCAGCTTAGAAGC
ATCCTAAATAGTGAGGAGCAGAGAGAGCTGCAAAGATTGGAAGAAGAGGAAAAGAAGAGGCTGGATAAGTTTGCAGAGGC
TGAGGATGAGCTAGTTCAGCAGAAGCAGTTGGTGAGAGAGCTAATCTCAGATGTGGAGTGTCGGAGTCAGTGGTCAGCAA
TGGAGCTGCTACAGGTAAGAAGGTTCACTCAATCTGAGATTCTGGGAACACAGTT---------CCCTTCTGTGTCCTTG
CGTTCTCATGCTGGTGGTGACACTAAGGGGTTTCTTTGGCCTTGCAGTGCTGCCTTGTCATCCATTCTAGATGTCATGGA
CATGAATGA-------------------------CATTTTTGTTAATTTATGAAGTAAGGGAATACATTTTACCTTGCAG
AGAAGATCCATGATATCTAGTTATAGTCTCTAGGCCCCTGTTATATGGGATCTAGTGTCAGGCATTCACCAGACTTCTCT
TTACTCCGATTAGTCACAGGTAAACACAT---GGATTTTCAGGTTTAAGAGCATACGCATTTAAGAAATGTGTTCTATTT
AAGTTTAAAATATGCTTATTT-TT--------------------------------------------------------
--------------------------------------------------------------------------------
--------------------------------------------------------------------------------
--------------------------------------------------------------------------------
---------------------------ATTGTAAATGTTCCCTGTTAATTTTTTTTTTTTTTTTTTTTTTTT-GAGGGGG
AGTCTTGCTCTGTCGCCCAGGCTGGAGTGCAGTAGCACGATCTCGACTCACTGCAAGCTCCGCCTCTCGGGTTCACGCCA
TTCTCCTGCCT-AGCCTCCAAAGTAGGTGGGACTACAAGTGCCCGCCACCATGCCTGGCTAACTTTTTTTGTATTTTTAG
TAGAGATGGGGTTTCACCGTGCTAGCCAGTATGGTCTTGATCTCCTGACCTCATGATCCGTCCGCCTCGGCCTCCCAAAG
TGCTGGGATTACAGGCCTGAGCCACCGCGCCCAGCCCCCTGTCAATTTTTTTAAAACATAAAGTGATAGAATATTGAGCC
TTTTGGGGAGATAGATGGACAAATATATAGACAGACAGTGCTTTCCTTTCTTTGCTGAATTTCCAAATATTTCCTTTTTA
AGATTTGGATCGAAGCAGGAGAGTAACTGATTTTCATTTGTTGAATTGTTTCCTTTGTCTCTGGTGCTTATATCCCAGCT
TTTTAAAAATTCTTTTCTCCTTTTGTCTTCTT-TTCTTGTTTAAATTTAAGATTACTCTGGAACAGAAGTTCCTAAACAT
ATTTTACACTCATTAGTATGGCTATAATAAAAAAA-GATGGACAATACCAAGTGTTGGGGAAGATGTGAAGAAATTGAAA
CCTTCTTGAATTGCTAGTAGAGATGTACAATA--GTAAAGCTACTTAG-AAAAACTGCTTGGCAGTTGCTCAGAAACATA
AAGAGAGTTCTCA-TGTGGCCTAGCCATTCCATTCCTACCTATATACCTAGAAGAACTGAATACATATATCTGTGCATAA
ACTTACATATGAAAGTTCACAGCAGTATTGTTCAAAAATAAAAACAACTCAAATCTCCTTAA-CTGATGAATGAATAAGC
AAAATGTGTTACATCCAAACAATGTAATATTGTTTAGCTATGAAAAATAATGAATTAATAATACATGCTATGACATGGAT
GCACCTTGAAAACATTAT---AAATGAAAGAAGGCAAGCACAAAGTTCTTTTTTGTATGATTCAATTTATATGAATTATA
CTTACAGAC-GTAAGTAGCAAATCCATAATATAGAAACGAGATTAGTGGTTGCCAGGGCTCTGGGGAAGAATTAATAGGA
AGTAATTGCTAATTAGTGTACAATTTCTATTTGTAGAGATGAAAATGATCTGGA-TTAACTGTGAAACGATGGTTGCACT
ACATTGTGAATATATTAAAACCTGTTA-----------------------------------------------------
--------------------------------------------------------------------------------
--------------------------------------------------------------------------------
--------------------------------------------------------------------------------
------AATTGTGCACTGTAAAGGGCAAATCTT-ATGGTATTTGAACTACATCTCAGTAAAAACAAAAGCAAAAAGATTC
TGTAGGCCCTTTTTTACGGTTCTTCCTTAAGCTCTTCACAACCCTTTGAATTGCCACCTTCACAAAAGAACACTGTGTTT
ATGTCATTTGTCCACGCATTTGTCCTATTTAAGTCAGTCTTAGTTGCTAT-TTAGTCACTTGGAATTTAAAAA-TTATTG
GTAGATCAAAAACTATAAATGCTGTGGGATTAACATTTCACATCTAGATGTTAGCTTCAAAGAATGGCAAATGGAAAACT
AAGGAACTTACTCTTTTATCTGAGTAGGGACTTTGGCTATTCCTCTC-AATATGTTAAGATGTA----------------
--------------------------------------------------------------------------------
--------------------------------------------------------------------------------
--------------------------------------------------------------------------------
--------------------------------------------------------------------------------
-------------TGCTGTTGTATTTGTGGTATTTCCCCTCCACAGTCCTGTCTCCTGAGAGTTCCTGTAACAGCTTTCT
TTCTATATGGATTCTTATGACAGTGACTGGGATGGATGGTGTTATCATATATCCATTGTTTGTTTCCTGGAGGGACTGAT
GTTC----------------------------------------------------------------------------
--------------------------------------------------------------------------------
--------------------------------------------------------------------------------
------------------------------------------------------------------------TTTGCATA
AGAGCTACATTCAACACTTACTGCCGAAGAATGATCTAGACAGAAAGATGCTAAACTTGAAAATTGATGCAAAAGTTAGA
TGAGATTTTAGGTTATTTCCCTTATAAAAGAGATACTTTGATTTTTAATGCTTTCCGTAATAGTTTTATTATATTTGACC
ATTTTTATTTTTGAAAGAATGGAATGGTAGGTAGCTAAATGAGGGAATGAAGATGGCAGTTATTATTATTTTTAAAACTT
TTTTT-C-AGATTTTTT---------------------------------------------------------------
--------------------------------------------------------------------------------
--------------------------------------------------------------------------------
----------------------------------------------------------------------AAATTTTTTT
TTTTTTTTTTTGAGACAGAGTCTTGCTCTGTCGCCCAGGCTGGGGTGCAGTGGCCGGATCTCAGCTCACTGCAAGCTCCG
CCTCCCGGGTTTAGACCATTCTCCTGCCTCAGCCTCCCGAGTAGCTGGGACTACAGGCGCCCGCCACCTCGCCCGGCTAG
TTTTTTGTATTTTTTTAGTAGAGACGGGGTTTCACCGTGTTAGCCAGGATGGTCTTGATCTCCTGACCTCGTGATCCGCC
CGTCTCGGCCTCCCAAAGTGCTGGGATTACAGGCTTGAGCCACCGCGCCCGGCCAGATTTTTTAAAATTTTAGATTCAGG
GG-CACA-------------------------------------------------------------------------
--------------------------------------------------------------------------------
-------------------------------------------------------------------------TGTACAG
GTTTCTTATCAGGGTCTATTGCACAATGCTAGGGTTTGGGCTTCATGGTACTCATTATTTTTGTCTTGTCAATATCCATT
CCCCGTTTTTCTGGTAACAACACCTGGAATTACTCTTGAAAGAAAGACTAGCATGTCTATTTCTATGCTTGTACTTGTTT
AGACCTGAGAAAATCAGCACTATCGAGGATGAATGAGTTAATTATGTGTAAATCAGTGTATCCAACCCTTACGTCCCTAC
CAGCCACACTGTGATAATTTATTATTATTATTATTATT-----TTTTTTTTTTTTGAGACGGAGTCTTGCTTTGTCGCCC
AGGCTGGAGTGCAGTGGCGCGATCTCTGCTCACTGCAAGCTCCGCCTCCCGGGTTCACGCCATTCTCCTGCCTCAGCCTC
CCAAGTAGCTGGGACTACAGGCACCCACCACCATGCCCGGCTAATTTTTTGTATTTTTAGTAGAGATGGGGTTTCACCGT
GTTAGCCAGGATGGTCTTGATCTCCTGACCTCGTGATCCGCCCGCCTCGGCCTCCCAAAGTGCTGGGATTACAGGCGTGA
GCCACCACGCCCGGCCACTGTGGTTATTTTAAGTTGGGCATCTGACCCAATCCTGAATGCTTGTGGGTGACAAAATTGTA
CTATCATTACAGTGAAGAGAAGTTGTCCCTTGTAGCAGAAAATAATACCAGTGAAGATAATTCAAATAAAAAGATTCAAG
TTGCTATCAATTAAAATCTGAGAATACAGTCAAAATATAGGGAAGAAATGAGAATTAATAGGCACAGAGAGGCCAGAATT
TTGACAGAGGTTTGAGCTTCCAGAGCCATCTGTGACTAAAGTAATACCTCTCTGGCCACAACCCTTACTTTCTTTCCAGT
TAAGGCAATTTTAGTTGTTGAACAACAAAACTATACTAATAAAGAGAGCAAACCCATTTATTTGGTTGTACAGCAGCTGG
TGTCATGAAAGAGT-AAGGCCAAATATATTGGTACATCTTGCTCAAAACAAAGTAACCCCTAGTGGTGATGATGGGGGAA
TGCAGATGACTAACAGAAATTAAGGATGGACTGCCTTGATAAAATGTTTTAGTGTCTGGGACAGGGACTGAGTGAATATT
GATACCATTTTGACGATAGGGCATAAGAAAGGAAGCA---TGGTTGGTGAATAGCTTATGTTTTAGATATTCTTAGTTAC
TAGTGCCCGTTTTTTCTTCTTTGCGGAATGTAGTATTGTACCTATACAGAATGAAGTCTAGCTGCTTTTTCTCATGGTCT
AATAATGAGAGGCAGACAGACTTGGAAAAGAAGGGGGTTTATTTTTTCAACTGGTTACAGGGAGAAAGTTGGAGTAACTT
ATCAGACCAACTCAGAGTTACAAGATTTTTTT---CTGGAGCTTATATACATTTTAAGCTCTATGCCTTCGTGTGGGAGT
GCACCTACAAGCAGGAGTGTTTTATTCAATTTATATCTATCTTTAACTAGGGTTTGAGGTCTAGAGAGTTTTCTCTAGAA
TCTTGGAAAGTTTCTTAATCTTAAATGGGCCCTGGTACAAGGTGTATGTGTAAGAATGCTTTTATTATTCGATCAGACTT
TAGGGTATGAGAAAACCCAGGCAGGGTCTTTAAAGGGTTTGCTTTCGCATTTCAGCCCTGGTACTCAGGCA----CCAGC
TTTTCCAATTCTTTAATGTTTAACTTCTGCATTCATCAAACTTATAGTAAAGGGATAAGGGAAACTGATTGTTCTGGTTG
CTGATGGAAACCTGACCTGCCACAGTATTATAGAAACATGATTACAGATAAAAGACAATGATTAGATATGTAAAGGCTGA
CAAAAAA-CAGCACCTATATATGAGCTAAAATTAAGATTAGAGGCTGGGCGCGGTGGCTCACACCTGTAATCCCAGCACT
TTGGGAGACTGAGGTGGGTGGGTCATGAGGTCAGGAGATCAAGACCATCCTGGCTAACATGGTGAAACCCCATCTCTACT
AAAAATACAAAAAA-TTAAATGGGCGTGGTGGCATGTGCCTGTAGTCCCAGGTACTTGGGAGGCTGAGGCAGGAGAATCA
CTTGAACCGGGGAGGTGGAGGTTGCAATAAGCCAAGGTCGCACTACTGCACTCCAGCCTGGGTGACAGAGTGAGACTCCA
TCTCAAAAAAAAAAAAAAAAAAAAAAAAA---GATTGGAAGAGGTTACGTATAGGTGGTGGATAGAGCAGGACTTTNNNN
NNNNNNNNNNNNNNNNNNNNNNNNNNNNNNNNNNNNNNNNNNNNNNNNNNNNNNNNNNNNNNNNNNNNNNNNNNNNNNNN
NNNNNNNNNNNNNNNNNNNNNNNNNNNNNNNNNNNNNNNNNNNNNNNNNNNNNNNNNNNNNNNNNNNNNNNNNNNNNNNN
NNNNNNNNNNNNNNNNNNNNNNNNNNNNNNNNNNNNNNNNNNNNNNNNNNNNNNNNNNNNNNNNNNNNNNNNNNNNNNNN
NNNNNNNNNNNNNNNNNNNNNNNNNNNNNNNNNNNNNNNNNNNNNNNNNNNNNNNNNNTTGTGGTATCAAATACTAAATC
TTATTCATTCTATCTAATTGCCAACATAGAGCCTTTTATTTCTTTTCTGTGACTAACTGCCCTGACTAGAACCTCCAATA
CCATGTTAAATAGAAGCAGTGAGAGCAGACATCCTTGTCTTTTCTGATCTTTGGGAAAAAGCATTCAGTTTTTCACCACA
AAGTATGATGTTAGCTGTAGGTTTTTCATAGATGTGTTTCATCAGGCTGAGGGACCTGTCTTCTATTCCAAGTTTGTTAC
CATTCCTGTTTTTTT-TTTT-TTTTTTTTAATGAAAGTGTGCT----------------TTTTTTTTTCATGTCTATTGA
GATCATCATGTGGTTTTTATCCTTTATTTTATTAATATGGTATATTACATCAATTGATTTTTTT---ATGTTGAACCAAC
CTTGCATTTCTGGGATAAATTCTACTTGACCATCAGGTATAATCTTTTTGCTGGATTGCCAGATTTGATTTTCTTATATT
TTTGTTGAAGAATTTTATATTTATATTCATAAGAGATATTGGCCTATGGTTTTCTTTTCTTGTGATGTCTTTGGTTCTTT
TATCAGGGTTCTTTTATCAGGGTAGGATGAGCCTCATGTAGTGAATTAGGAAGTGTTCCCTGCTCTTCTATATTTTTGAA
ATAATTTATGAAGTTTTGATATTATTTCTTTTTAAACCTTTAGCAGAATTCTCCAGTGAAGCCATCTGGGTAAGGCCTTT
TCTCTGTAGGAAGTCTTTGATTTCCAACTTAGTATCTTAACATGTTTTAGGCCTATTCATATTTTCTATGTGTTCTTTAA
TCAATATTGATAGTTTCTGTATTTCTAGGAATTTGTCTATTTCATTTCGATTATCTAATTTGTTGGCATACAGTTGTTCA
TCATTTTTATAATTCTTTTAATTTCCATAAGGTCAGTAGTAATATCCCATCTTTCATTCCCGATTTTTTTTTTCTTGGTG
TGTCTAGCTAAACGTTTGCCAATTTTGTTGACATTTTCATATAACTCACTTCTGATTTTTCCATTTTTTTT--CTATGGT
TCTT---TCTTTCATTAGTCTTACGCTAGTCTTTATACACTTTGACTCATGTTTTCTCTTTTCTTTCTAGGACATGAGTG
GAATCATGAAATGGTGCGTATGGGTGGCCAGGAGTGGTGCTTGTGAGTTATAAAGAAGTGTTTGTAGCTATTAGAGTTAT
TTGGTGGTCAATCAGAACAAAAAAATCTCCCAGAGCAGTAAAATTTAGATGTAACTTTATCTTAAATTGCTGGTCCCAGA
TGAGTATTTGAGAGTTCCATAACTACTGAGAATGGACTCAATCCTATAGTACTAAATTCAGTGACTGAAGTTCAGAGCTA
CAGCCAGAAAGGATATTAAGGATGAGAGCTTTTACTGTCAGACTTCTGTGACTTCACTTGTTTAATTCATCCTCTGTCCC
TGCATCCAGCCCTGGATCTTTTATTTTATATGTGTTTGTCATATCACATGGAGGGCCTTGTCAAATCCTAAAATAGGGCA
TGGAGACAGCTCCTTTATATTTACTTTGCTTACTTAGAAATAGAAGGTACCAGATCATTATGCAAGGTT-----------
--------------------------------------------------------------------------------
--------------------------------------------------------------------------------
--------------------------------------------------------------------------------
--------------------------------------------------------------------------------
--------------------------------------------------------------------------------
--------------------------------------------------------------------------------
--------------------------------------------------------------------------------
--------------------------------------------------------------------------------
--------------------------------------------------------------------------------
-----------------------------------------------------CTCTTTAGATTTCCAAAAGCAGACTCG
AGCCTCAGGATGGTAGCTTTGACTCTGATGACGATAATTGATCTCTGCCTGTTCACATACTTTAGAAGCTCCTACGGAAA
AGTGTAGTCCTTGTTCCTTATGTTTACCATGGCCAACCTACTTGGAAACATCAAGTTTCTTACAAACAGATAAAATTCTA
AC-ATTTTTACTTAGGTGGTCATAACTTCTCCTTTGCCAAGTGTTCATGTTTCCCAGAGAATCCGAAATCTCAAATGTGG
GCCATCCCACTGGAGTTCAGGCTTTGAACTAGGGCACAGGCTCACAGGATTTCCCTACAGAGCCCCACATCACAGTCAGG
ATCTACAGCG----------------CAGAATATTACATCTCTGGCCCCTCCCAGAGGACCCACTGAGATGCAGTGAGTT
TTCCACATATCACTTACCATTTCTACAGGTAGCAAAGTATTTTCCTATGCATTGTTTTATCCAATTTTTTATTATTTCCA
TTAGAGATCAAAGGAGGGTTTAATTATTTTATTTTT--AAGGAAGAAACTGTACTTTCAAAAAATGAAGACCTTCCCAAG
GCCACCCAGAGGATAAGAGGGAAAGTAGACACAGTCACATTTCTTCTGGATCCAGGGTCAGGCTCTCCCTTCTCCCCCTC
CTCAGGCTAAGGGAGAAGGATTCAAGTGCATCAGTGATGTGAAGGAGATGAAACCAGTGATGTGGGAGGGATGGACGCAG
GATGAAAGATGTGGGGGTCAGACCATTTTTATCATTCCTAGGAGTGAGATCTGGAGGCTGAAAAAGCCAAAAAAGGTTTC
CAAGAAACTGAAGACTGTATTCCGTGCTCCAGATCTGAGTAGGATGCTGCAAATGTTTAGAGGTGAGGAGAAGCA----T
AGACTGTGGATGTGGGATTGTTGTGGTGTCAGGTAATAAACTGTCTAGGTGGGATAACTTAAAATTGAGGACAGA-GAGA
GGAGGGAGGTCAGAAAAAAAGCAATATTCTGTGATGAAGAGGATACATTTATATGTAAGGAAAAGTGGCTAGGTCTTTGG
TTTATCTTTT-AATTCACTAGCTCACAGCTTCACGGTATTCCCTTCCCCTGTCCCTACTCCAAAGAATATATAGGTATCA
GTGCTTACTCCTTTGTTTCTAATCACCATCACTGAATCTTTTATTATTTCAGAACTGACAGCTGTCCGATGCTACTGGGG
TAAGAAAAAGTTACCGTCTTTAAATAACTGTGTTCCATTTACCTTCCAGAAGTTTATGG-------TTTCAATGATATCT
TCTGATCTTAGCCTCATGCATTCTTAGCACCTCCCAAAACATTTGCCTAATGCATTTCTCCAGTGTTTTACCCC-TCCCA
CAATT-CATCAATGCAAGTTTTTCAGTCACCTCTCAAGTTCCTTCATCACAATGTCACTAGATAAAC-TACTCCAT-ATC
TGTCACCTAGTCATATATATCACATAGATGATTATATTCAT------ATATA-TACACA---------------------
-------------TTTTTTTTTTCTTGCAGCGGATGTCACACTGAATTCAGTCAACCTAAATTTGAATCTTGTCCTTTCA
GAAGATCAGAGACAAGTGATATCTGTGCCAATTTGGCCTTTTCAGTGTTATAATTATGGTGTCTTGGGATCCCAATATTT
CTCCTCTGGGAAACATTACTGGGAAGTGGATGTGTCCAAGAAAACTGCCTGGATCTTGGGAGTATATTGTAGAACATGTT
CCCGCAATATAAAGTATGTTGTTAGAAGATGTGCAAATCATCAAAATGTTTACTCCAAATACAGACCTTTATTTGGCTAC
TGGGTTATAGGGTTACAGAATAAATGTAAGTATAGTGCCTTTGAGGAGTCTTTGTCCTCTGATCCTGAGGTTTTGACTCT
CTCCATGGCTGTGCCTCCCTGCCGTGTTGGGGTTTTCCTAGACTATGAAGCAGGTATAGTCTCATTTTTCAATGTCACAA
GCCATGGCTCCCTCATTTACAAGTTCTCTAAATGTTGCTTTTCTCAGCCTGTTTATCCATATTTCAATCCTTGGAACTGT
CCAGCTCCCATGACGCTATGCCCACCAAGCTCTTGAATTTTCTCATTTCTTCACCTACAACTCTTTGTCTTGACTTATCT
CCTGCAACTGACTCATCTGCAACATTCAGACCATTGCTTCCTTGTGGTTTCCCTTC-----TTTAGAACTTCTACTCATC
TTTGAGATGTACAGTATATTTGGCTTGAGTTATGAGAGATGCTTATTTATTCATTTACTCTTTTTCATATTTTCAGAGAA
AGTTACCTAATCCCTCCTAAAGACACAGTAGTATTGGTATAACATCCTTGCCTTCCCACTTGTCCGTATTTTGCTTTACC
ACTGATGTGAAGAGGCCCAAAGCCTGTTAGCCACCATCCATGCTACCTAGGTAGTCCATAGGAACCACCCTGATGACCAC
CACCAACATCAACTAAAGGTTCTTGGAGGGTATGTCAGTGTTTTGCTCAGGATATCCCAGATACATCAAGGAATTAAGGA
GAGGAAAATACAAGCAATATGTGTATTCAGAGTGAAGATTTTATGTCCAGAGTATTTGAGCTCTAACCCTGTCTCTTGTT
TTCTAATCATGATGAATACTTTCTCAGTTTCTTTTTCCTGAAATATAAATTAGGATTTAAG-------------------
---------------------------------AAAGTACTTAACTATTAAAATCATTGTGTAAAACTAAGTGTCTCTGA
ATGTAATGCACTAATTTAGTGTCTGGAACATAATAAATATTTGCTCTCATGATTACTAAAAA
>Papio_anubis_TRIM34
ACCCTGGCTTTTCTTCACCTCTTCAACCAGGAGCCGAGATTTCTGTTGGTCTGAAGGTGTGTGGGGAGGTTTGT-GGGGG
GTAGAAGGTATGAGACTCAAGGAGAAAAGTTCTCAATGAAGTTAGGATGATTTGATTTATGGCCCCAAGGCTGCCCTGCT
CTGTCGGGAGCAAAGGCTGGCGTGCAGGCTTCCTGCTTTGAGTGCGCACTGAT------------AGCAGCCTAGAGTCT
GGGGAGGGACAGCCTTGAAAGCAGTGTTAAAGAGGCAGAAGGCCGCCTTTGTTTTCTGGAGTGTCTT-TTTTTTT-----
-CTCCAGGCTGAATCCAGTTCCATTGCCTTCCTATTGTATAATTCTGATTTTCTACCTTGCAAAGGAAACTGAATTCTCT
CTCTCTC---TTTCTCTCTCTCTCTCTCTT----------------------------------------------AAAG
AGATGAACAGAAGATCTCTTATTTTCCACCCCC--CTCCCTCCTCAAAAGAGAAGTTGGTGAGAGGAGGTCTCTGTTTTT
CAAGTGTGTGCAGGGCTTAGCTCCTAGTATGCAGCATCAGATAGAATGGAGCCA---TGGGGGCATGGCCAGGGGGAATA
TTGAAGCGGGTTCTTTCGCTGCCCTCCTGGCAACCACTAAGCGGCTTTCTGAGGCCATCCTCACGTATTCTTAGTCCTTG
GCCTGCCTGACTATAGCAGGTTGAGTGATCTGTCTGCTGCACACTGCTGTGTTCCCTCTTATCCTGTGTCTTTCTGCAGG
TCATCTCAGGGCTCTCCTTGCACATCCCTGAACATAC-TG----------------------------------------
--------------------------------------------------------------------------------
--------------------------------------------------------------------------------
--------------------------------------------------------------------------------
--------------------------------------------------------------------------------
--------------------------------------------------------------------------------
-----------------------------------------------------TTTACTTTTACTTCAGTAACCCATGTG
CCACCAGCGTCTTCACCTGTCTCAGAACTCGTTCCTCATCATTCTTCCTCTTAGACACACCTTTGCATTGATTTATAACC
TCAATTTCTTA-TTGCTTTTCTTTGCTCACAACTACTTAGCAGAAGTTGTTTATTGTGGGCTCAGAAGGAGCCCACAGAT
TTAATCTTCTTGTT------------------------------------------------------------------
---------------------------------------------------------------------------AAGAA
TTTGACATA-CAGTATGTCCTATCTTAAGCTCACTTGCGAGCAATTTG----CACCTTGATTGATATGTTACAGATATTC
CGACACATGCCATTCTGGACTCTGCTGTCACCCCTCAGAGTTCACTGAAACTGCCATCCT----------------CCTG
GGGAGAATCCATGTCTGCCTACATACTGACTGTCTCCCAGAGGTGTCTAGTCAGGCACGAGGCCCAA-TATATGGGATAA
TATTGATTATAAAGCAGGCTGCTGATGTAAAAATGTGCAATTAGCATCCATTCAGCATTCAGAAAAT----ATGAAATAT
ACGTGGAAGCCTACATTCTAATTAGACAGCAATCATAGACCATATCAATGAATGATAGAGTACACAAGAAGATAACTAAT
ACTATGGAGTAACATCTTT-------------------------------------------------------------
--------------------------------------------------------------------------------
--------------------------------------------------------------------------------
--------------------------------------------------------------------------------
--------------------------------------------------------------------------------
--------------------------------------------------------------------------------
--------------------------------------------------------------------------------
--------------------------------------------------------------------------------
---AAGAAGTTAAATTAGGATAAGGACTCTGTAAAGACCTCATAAAGGCCTTG---------------------------
--------------------------------------------------------------------------------
--------------------------------------------------------------------------------
---------------------------------------------------------------------CAACTTTAAAT
AGTTTTTATGAAAGTTTTAAATAGTTTTCATTGTAAGAAGAACACTTTTGAATAGAATCTTAAGAAT---GTGAGGAAAG
TATAGTCTTTAA-TGGTTTTTCCC-TGCGCTTAAAAGGAGAACAGTGTGGATACGGAAGGTTGAGATGGGAGTGTGCAGG
GAGAGGAATAAAAGGTGAGCTCTGGCCAGAAGTGGTGGCTCATGCTTGTAATCCCAGCACTTTGGGAGGACAAGGCGGGA
GGATCACCAGAGATCAGGAGTTCAAGACCAGCCTGCCCAATGTGGTGAAACCCTTTCTCTACTAAAAAAATGCAAAAATT
AGCTGGGCATGGTG-TGGATGTCTGTAGTCCCAGCTACTTGGGAGGCTGAGGCAGGAGAATCGCTTGAAGCCGGGAGGTG
GAGGTTGC-------CAAGATCTTGCCATTGCGCTCCAGTCTTCCAGCCTGGGGGACAAGAGTGAGAT--TTTCTCAAAA
AAAAAAAAAAAAAAAAAA----GGTGAGCTCTGAAGATTGAGGCAGTGGGAAGGGATGTGTGATGCGGACCTAACTGGAC
CATTATGAAGTCTGGCCTCACTCTGGATGGAATGGGTGTGAACAGAAGAGTGACATGAT---TGACATCT-GCTTTAAGG
TGATCACTCTATCTACTGATGTAAGAACAAAGATGAGAGCAGAGTGAAGAAGGGCAATCATGGCTGGGCACAGTAGCTCA
TGCCTATAATCCTAGCACTGTGGGAGGCCAAGGCAGGTGGATCACTTGAGGTGGATCATGAGTTTGAGACCACCCTGGCC
AAGATGGTGAAACTCTGTCTCTACTAAAAATACAAAAATTAGCCAGGCGTGGTAGCAGGCACCTGTAATCCCAGCTACTT
GGGAGGCTGAGGCAAGAGAATCACTTGAACCCGGCAGGCAGAGGTTGCAGTGAGCCGAGATCACGCCACCACACTACAAC
CTGGCTAACAAGAGCGAACCTCTATCTCAAAAAAAAAAA----------------GGAAGGGCAATGATAGTATCAGCAA
GACTAGTTGAAGAACAATTTCCTGAATTTAGGTGGTTTCTTCCGGAGTGGTGGCAGTTGAGGTGGTTGGAA-CTAATTTG
GAAAAAAAAAAAAAAAAACTCTTTCAGCATATTCTCACGAAGTAACAGACAGAAAAAGACAAGATTAGGGGTTGCTTAAT
GAAAATGATTCTATGTTAAAAAAAAAAAAAAAAAAAAAAACTTTTGGGAAATATATTGACCAGAACACTACAGCTCTTGG
GGAGAGAGTCACTAATGTGGTATAGATTGAGACCTGGACTCTAAGGAGTAGCTGAAGCAAGAACTCAGTCCATAGAGGAA
TGGGAAGGAGATGTTACGATGTTTCTGAACTCTCCAGGCCTCTGGATGTCAAAACAGGCTCTACTTTCCTTATTGGCAGT
TTCTGACCAAGGAAACAGAAGAAATGTCTAGGATATTGTCTAGAAACTTCAAAAGACATCCTCCCC-TAAAAGTCACTCT
TAGACACACTCTAATTTTACTATCTA-CCTGCAAAGAGACTTA-AAATTTGCATTATCATATCCAGATGTTAGGAGTCCA
GATGTTAGGAGAAGACTCAAAAGAAGGGTACAATCACCTGGCAGCTATGGTAACCAGGTAACCTGGGAGTTCTGTCAGGC
CCATGGCACTCATGTTCCCTTCTCTACCTCCCTGACTGCTGCTG---GGCTTGAGCCACATTGGGAAGTGGTGGGGTCAT
TTCTCACACGTGGGACCCTGGT-CCTCTGCACTTTTCTCATTCTTTTGTCATTATGGTGGCAGCAGCTTTGGCATCAACA
TGTAGCCTCACTGTGAACATGAAGTCACAGCCCGTGGCAGAATGCATGTTCTACTGCTTCCTCTCCTGGAGTCCCCCAGT
ATTTCTAACTATTAGTTGGATACTGATTGGAATAAAAGATAACAAAGAACCCCACATCTGTGGTTGGCTCATA-GCTTTA
GCCATAAACAGGGGTGAATATTATCATATCATGTAAACTCCTGGTCTTACTAGTCATCAGATCCTGGTCTGACCAATGGT
CATTGCAGCCAGGGG-CTACCAGTATATCTCTTTTGTATGATTTTTAGTATCTGTACCATTGGCCGGATGACATTTGCCA
GCCTACTTTCAACCTTTTTTCCTCCTTAAGGTCTTTTGATGGATGATTAGAGGAATAGACAGGTCTCGAGGCCTAGATTT
ATCTTCATACAGCTTTTTATCGTACCCCATCCTTTTGCCAAGCATAGGAAAGATTCCTAGGTTGTCACACAT-CACAGAT
CTTTCTTTC----ACTATCAAACCTGTTCAATTCTATTAGTTTTTTAGCACTGTTGTAACCAATTATCACAAACTAGATG
ACTTAAAACAATAGGAAT--------------------------CTATATCACAGCTCAGGAGTCCAGAAGTCCAAAAGC
AAGATGGTGGCAAACTTGATTTTTTT----CAGAAGGCTCTATGTGAAAATGGGTTCTATTCCTCTCCCCTAGCTTCTGG
GGGTTTCTAGCAAACCTTGGCATTCTTTGGCTTATATCTGTGCTACTTCCGTCTCTGTCTCTATTGTCACATGGCTTTCT
TTCCCGTGTGTTTGTATGTCCTCTCCTCTT---ATAAAAACACAGGTCAAGGCCGGGTGCAGTGGCTCACACCTATAATC
CCAGCACTTTGGGAGGCTGAGGCAGGTGGATCACCTGAGGTCAGGAGATCGAGACCAGCCTGGCCAACATGGTGAAACCC
CATCTCTACTAAAAATATAAAAA-TTAGCTGGGCTTGGTGGCATATGCCTGTAATCCCAGCTACTCAGGAGACTGAGGCA
GGAGAATCGCTTGAACCTGGGAGGCGGGGGTTGCAGTGAGCTGAAATCGCGCCATTGTACTCCAGCCTGGGCGACAGAGC
-GAAACTCCATCTCAAAAAAA--GAAAAAAA-CACAGATCTTTAAATTTAGGGCTTGTCTTTATCCAGTATGACCTCATC
TTAACTTGA------TTACACCTGCAAAGATGTAGTTTTCAATTAAGGTCATATTCATACAAGCAAATATATTTTTGTGG
AGGGTATAATACTCTCTACTAGAACAAGTATCAAAATGTTACTTACTGCCTACTGAGAGCCACCCTTTTTCCCTTTGCCT
CACAGTTTCTTGTCTAAACTGACCTCAGGTTCTGAGAATTGGCATTGTATCATCATGCCACTACTCTGTGGTGC-ACCCT
CTGGCTGACCACAAGCAATAATTGCAGGTTTCTTTTGCCATTTGCACTCATGCAGCTTAACTCCGCAGGGGGAATACAGG
ACAGGAGATATAGCATGCAGGCAGG----GCTGCTTCAGGTAAGCTCTTAGTGAGGATTTTTTTTTTTTTTTTTGTA---
--ATACAGAGTCTCGCTCTGTTGCCCAGACTAGAGTGCAGTGGCGCCATCTCGGCTCACTGCAAGTTCTGCCTCCCCTGT
TCACGCCATTCTCCTGTCTCAGCCTCCCGAGTAGCTGGGACTACAGGCGCCCACCACCATGCCTGGCTAATTTTTGTATT
TTTAGTAGAGACGGGGTTTCACCTTGTTAGCCGGGATGGTCTCGATCTCCTGACCTCGTGATCTGCCAGCCTCAGCCTCC
CAAGGTGCTGGGATTACAGGTGTGAGCCACCGCGCCCGGCCTCAGTGAGGATTCTTATGTTGGTACAAGACCACGTG---
-----GATGTGTGTGAAACTAACGTAGCTTAGGTAAATCTTACATCAACAGACTGATTCCCTTGTAAAGACCATGAACAT
AGCTTCCAGGGCCCTACAGAGAATATTTTGTTACAAGAGTCTCAGCCCTCTTACAGAAGATGAGGTCTGTGCTTACCAAA
A---------------AAATAAAAATGAAATAATATACCAGGGGATGGTGATGGGGATGTCTTTTTTATAGGAAGGAAGG
ACTTTAAGCCTAATGATATCCCTTTTTTCCCCCACATGTCTAGTCTGACTTCCAATCTTATTTCCTTTACCTCACCCTAT
TTCCCACCCTCATCTGCTTCTCTCTATTTCTTCTGTTAACTTGTCCTGCATCCTCCCATCCCTGCCCTCACCTCCTATTC
ATTGGAAAGAGACTGTCACTTTTACTTCATTTAGGAAGTGTCACATATCCAGGTTCTTCTAGGCTCATGTGATGCCAAGG
-CCTAGGGCTTTTTGCATACCAACCACACATTTAAAAACTTTCGAAGATGTTATGATGCTACATCCTCCATGAAC----G
GGGCATTCACTTACATAACTCCTTCTACCTAAAATATTTGTTTTCTTTCTCATTCTGTGTTCCTTTCTCTTTATTCAGCT
TTCATT-AAACTCTTGCTTATCCA-GCAAGATATCTTGGATTGTTCTCTACTTAGCAAATTATTTG-TTTTCTAAAAACC
TATACCTCTCTATGATGGTGTTTTTT-ACACCTTTATAGGTGTAATTTTTACTATTTTACACTTTATGAATGATTATATA
ATTAGCTTCTATCTTATTTAGGTGACTATTTACTTTATTCTGGCTAATACCATCTGTTCAT-ACTCAACTTTGAATTTTA
ATCCATTTCCTAGATTTTAATCATGGAAGATAATATGTCTTCAGTGAGAATTTCCAAAATAAACACAGGAATAATTGGCA
TTCAATGAGTGGATGTGGATTTAACACAGACAGAA---CTTCATTGCTCCTAAATGTAGTCTCCCGTTATATATTGGGAC
ATCTCTCCCATGACCAACAGCCATCTCCTTGGTATTTCTATTCCTCAATGATCTGACATTGGTATGAATCTGTGATCTAT
GTGTAATTCAGCTGGTTACACCCCCTGCCCCAACAAATACACACCTTTTGGTTCCTATCAACCTCTATAACATCCTT-CA
TGCCAAGATGAAATC----CTACCATCTACAAACACAAGACCCCCT-AGAAATTCCCAGCTTATGTGGTTTCCTCCATTT
CTACACTCTCATAACACTGGATCCCAATCTACTTCTTTCAGGCTTTACCTCTGCTTTTCTTTGTTTAAATAAGTGGAGTA
GCATGGAGACCTCCGAAAGAGAACTCTGAGGATATTATGTTCACTCCAATTCTACCTATTGAATTGGATGATCTTTGTAA
GTCATTTAATTTTATTTATTCATCTGAA-GAAAGGGAGTACTCTTACTT-------------------------------
--------------------------------------------------------------------------------
--------------------------------------------------------------------------------
--------------------------------------------------------------------------------
--------------------------------CTTAAGAATTTTTGAAGGAGGAACAAATAGGCCAAAGTGATTTTTAAA
TTGTAACTGGTAATGAAATCTCCATATTGTGGTCATTGCTGTTTCTGTGAGTATCTCTGGAAAGTGTGTGAGGGCATGGG
AGGATTTTGTGTGGGTGGATGTGTTAGAAGGTGAGCACTTCTTCACTGGAAACCACATCTGGGGTTCCAAAGTTCAGCTA
TTGAAGAATTTCCAAATAATGG---GAA-AGAAAAATGAAACACT-----------------------------------
--------------------------------------------------------------------------------
------------------------GATAAA---GTTTT---------------AGTCGTCTATGG-AGAGACAGGGA---
TTTATATATATATATATTTATCAAACATTGTGCTTCTCTATGTTCTAAACACTGAGGCTATAGCAGTAAA----------
------AAAACAGAAGTGCCTAATCTATGTGTAGATTATATTTTAGAAAGAAGACGTAGACATTTTAAAATAGATAGTGA
TAATA---------------------------------------------------------------------------
--------------------------------------------------------------------------------
--------------------------------------------------------------------------------
-----------------------------------------------------------------------AGAGAAAGA
TGGCAAATGTACATTGAATGATGAGTTTGTGGTTGTGCTGTAGTTAAGTTTGTCTTATCAGGCCCTTCTG-TGAAGGGAC
ATGTAAGGAGAAAGTTGAAAAAT---GTATAAACGAAAGTTATGCAAATAGCAACAGGAGGGTAATTCTAGGCTGAGTAA
TGAACAAGTGCAAAAGCCTTGAGGCATTAACAGCTTGCCCAGACCACTTTCAGCCATTTTTGGTTTCTCTTCCTCATCTT
T----GTTCTTTGATGTTGCAGTCTTGGCCAGTCTTTGATGTGTGCGCAATTAGAATGCATTTTATTTGTACCATTCTTA
TACCAT--CCTTTCAATCTTCTCGGCCATCCAGGGGTCTTTAACCA-GAAGAGAGAGGAAAGCCTCAGGAGTTAGGACCA
GAAGAAGCCAGGAAAGCAGTGCAATGGCTTCAAAAATCTTGCTTAATGTGCAAGAGGAGGTCACTTGTCCCATCTGCCTG
GAGCTGTTGACAGAACCCTTGAGTCTAGGCTGTGGCCACAGCCTCTGCCGAGCCTGCATCACTGTGAGCAGCAAGGAGGC
AGTGACCAGCCCAGGAGGAAAAAGCAGCTGTCCTGTGTGTGGTACCAGTTACTCATTTGAAAACCTACAAACTAATCGGC
ATCTGACCAACATAGTGGAGAGACTCAAGGAGGTCAAGTTGAGCTCAGACAATGGGAAGAAGAGAGATCTCTGTGATCAT
CATGGAGAGAAACTCCTACTCTTCTGTAAGGAGGACAGGAAAGTCATTTGCTGGCTTTGTGAGCGGTCTCAGGAGCACCG
TGGTCACCACACAGTCCTCACGGAGGAATTATTCAAGGAATGTCAGGTAGGGCCCTAGATGGAGGGAGTTGGGGCAGAAG
ATGGTAGTTGGTGGAAAGTCTCACCCTTTCATCCTTCTTTTTTTTTTTTTTTTTTTTTTTT---GAGAAAAAAAAGTCAC
-CTGTCACCCAGGCTGGAGTGCAGTGGTGTGATCTCTACTCACTGCAACCTCCGCCCTCCGAGTTCAAGCGATTCTTCTG
CCTCAGCCTCCCGAGCAGTTAGGATTATAGGCACCTGCCACCGCGCCCAGCTATTTTTTTGTTTGCTTGTTTGTTTGTTT
GTTTGTTGTTTTTTTTTTTTAGTAGAGACGGAGTTTCACCATCTTGGCCAGGCTGGTCTTAAACTCCTAATCTCACAATC
CACCCACTTCGGCCTCCCAAAGTGCTGGGATTACAGGCGTAAGCCACCGCCCCCAGCCTTTTTTTTTTTTTTTTTTTT--
------GTGAGCAATAAAGGTTTTTAATCACCTGGGTGCAGGCGGACTAAGTCAGAAAAAGGAGCCAGCCCTTTTCATCC
TTCTTTACCCCTTGTGGAACCATAATTCTGAGTCCCTTGATCATCTCCCTGTATATCTTTCACCCTGTGCTCAGCTTCCA
ATGCCTGGGGTACATTCCTATGAATTCCTTTCATTTACATAACAGATGATCCTAGAGTACAGTCTCTTAGCCTAGAGTGA
GAGATTTTTGTTTTGTTTTTTCCTTTTTCATTGTATAGTTGATAAATTCCTTCCCAAAGTTAGCTCTCTTGCTTCTTTAA
GCAGGATAATTGCTCAGGAACATTGTGGATTGAACCAGGAAAGAGCATTGATAAGAGGAAAAGACTTTCCTTTCTGCAGG
GTAAATACTTACTCTAAGGAAAGAGAGAATCAGGCTACTCCTCTTGA-GGGGTATTGATTTTCATCAC-AATGAATAAAC
GATACATTCGTCTCCTCAAATTTTTCCCCGTGTCATAGATTCTAATCACCAGCTTCACAGTTTCTGTAAATTGATTTTTT
TCTGGCATCAACTTGATTTTTTCTCTGTT-GTCTTCTATCCAGATACTGAGAAAGCTTATAGCTTGACTCTAGTGTGATT
CCCTTCTCCTAGGGGAAACTCCAGGCAGTCCTCAAGAGGCTGAAGAAGGAGGAACAGGAAGCTGAGAAGCTAGAAGCTGA
CATCAGAGAAGAGAAAACTTCCTGGAAGGCAAGAGGAGACTCTGAAGGATTTCTGAGACAGGAATCTTGACAGGACCTTA
ATCCGAGGAGGCCTCATCCTTTT-ATTCCTTGACATTGCATGAGTCCTGAAGCCATTTGATTAGTTCTCTTCTCTGTCCT
GTCCCTGTTGGGGGTGGAGGCTAGAAAGTGGACATGTTACAATT-ACACACACATAC-TGGAACTAAGCACAAAGATGGA
CTCTATGATGAGGAAGGCTAGCAAATA-----------------------------------------------CTGTGT
TCCATTGCTCTTTTCCTATGAGGCTCTACTACTTCTGGTGAAAGACACTAAATAAAGGACTACAGTTTTCCTCAAGATTC
AAATTAGGAGTGTGGTAAGGCAGGCAGTCATGAATATCCAGGAAAGTGGTCTAGAAGCTAAGCCTTAT---GTTTTACAT
TTTGTCTGAGGGTTAGCCTAGATAAGACAGTTTGAGGTCATTGTTTTGGCAAGTACTGAAAGGAAAATAGTAGGAAAAAA
TAGCTTCCCTCTAAGTCCCTCTATTG------------------------------------------------------
--------------------------------------------------------------------------------
--------------------------------------------------------------------------------
--------------------------------------------------------------------------------
-----------CTTC----TACTCC-TTGCTGATTTGAACTCCCTGAAAAAAAAAA-------CTATATATAGATAATAT
AGGTCTATATATATA----CAGATA-----------ATATAAATACACACACAC----------------GTGTGTGTGT
GTGTGTGTGTGTGTGTGTATTTCCCTACTGCCTCCTAATCCCTTGCACAATAGGCCCTTAGCCTGACAAACTTATTACAT
CTCTCTCTTGTCCATCCTTGCAGTATCAGGTACAAACTGAGAGACAAAGGATACAAACAGAATTTGATCAGCTTAGAAGC
ATCCTAAATAGTGAGGAGCAGAGAGAGCTGCAAAGATTGGAAGAAGAGGAAAAGAAGAGGCTGGATAAGTTTGCAGAGGC
TGAGGATGAGCTAGTTCAGCAGAAGCAGTTGGTGAGAGAGCTAATCTCAGATGTGGAGTGTCGGAGTCAGTGGTCAGCAA
TGGAGCTGCTACAGGTAAGAAGGTTCACTCAATCTGAGATTCTGGGAACACAGTT---------CCCTTCTGTGTCCTTG
CGTTCTCATGCTGGTGGTGACACTAAGGGGTTTCTTTGGCCTTGCAGTGCTGCCTTGTCATCCATTCTAGATGTCATGGA
CATGAATGA-------------------------CATTTTTGTTAATTTATGAAGTAAGGGAATACATTTTACCTTGCAG
AGAAGATCCATGATATCTAGTTATAGTCTCTAGGCCCCTGTTATATGGGATCTAGTGTCAGGCATTCACCAGACTTCTCT
TTACTCGGATTAGTCACAGGTAAACACAT---GGATTTTCAGGTTTAAGAGCATACACATTTAAGAAATGTGTTCTATTT
AAGTTTAAAATATGCTTTTTTTTTCCCCATGAGTCACTGTTCTTTAATTTCTCTCAGAAGTTAGACAGTTTTAAGGGTAT
AAGAAGTACATATATTTTGAAAAATTTATCCCTAAGAATTTTACATTTGTTGACAGTATTCTAAGTTGTACTTTTTTTTT
AAAATTTATTTATTATTATTATACTTTAAGTTCTAGGGTACATGTGCATAACGTGCAGGTTTGTTACATATGTATACTTG
TGCCATGTTGGTGTGCTGCACCCATCAACTCGTCAGCACCCATCAACTCGTCATTTACATCAGGTATAACTCCCAATGCA
ATCCCTCCCCTCTCCCTCCCCCCTCCCCTTGTAAATGTTCCCTGTTAATTTTTTTTTTTTTTTTTTT------GAGGCGG
AGTCTTGCTCTGTTGCCCAGGCTGGAGTGCAGTAGCACGATCTCGACTCACTGCAAGCTCCGCCTCTCGGGTTCACGCCA
TTTTCCTGCCT-AGCCTCCCAAGTAGGTGGGACTACAAGTGCCCGCCACCATGCCTGGTTAACTTTTTTTGTATTTTTAG
TAGAGATGGGGTTTCACCGTGCTAGCCAGTATGGTCTTGATCTCCTGACCTCATGATCCGCCCGCCTCGGCCTCCCAAAG
TGCTGGGATTACAGGCCTGAGCCACCGCGCCCAGCCCCCTGTCAATTTTTTTAAAACATAAAGTGATAGAATATTGAGCC
TTTTGGGGAGATAGATGGACAAATATATAGACAGACAGTGCTTTCCTTTCTTTGCTGAATTTCCAAATATTTCCTTTTTA
AGATTTGGATCGAAGCAGGAGAGTAACTGATTTTCATTTGTTGAATTGCTTCCTTTGTCTCTGGTGCTTATATCCCAGCT
TTTTAAAAATTCCTTTCTCCTTTTGCCTTCTT-TTCTTGTTTAAATTTAAGATTACTCTGGAACAGAAGTTCCTAAACAT
ATTTTACACTCATTAGTATGGCTATAATAAAAAAAAGATGGACAATACCAAGTGTTGGGGAAGATGTGAAGAAATTGAAA
CCTTCTTGAATTGCTAGTAGAGATGTACAATA--GTAAAGCTACTTAG-AAAAACTGCTTGGCAGTTGCTCAGAAACATA
AAGAGAGTTCTCA-TGTGGCCTAGCCATTCCATTCCTACCTATATACCTAGAAGAACTGAATACATATATCTGTGCATAA
ACTTATATATGAAAGTTCACAGCAGTATTGTTCAAAAATAAAAACAACTCAAATCTCCTTAA-CTGATGAATGAATAAGC
AAAATGTGTTATATCCAAACAATGTAATATTGTTTAGCTATGAAAAATAATGAATTAATAATACATGCTATGACATGGAT
GCACCTTGAAAACATTAT---AAATGAAAGAAGGCAAGCACAAAGTTCTTTTTTGTATGATTCAATTTATATGAATTATA
CTTACAGAC-GTAAGTAGCAAATCCATAATATAGAAATGAGATTAGTGGTTGCCAGGGCTCTGGGGAAGAATTAATAGGA
AGTAATTGCTAATTAGTGTACAATTTCTATTTGTAGAGATGAAAATGATCTGGA-TTAACTGTGAAACGATGGTTGCACT
ACATTGTGAATATATTAAAACCTGTTA-----------------------------------------------------
--------------------------------------------------------------------------------
--------------------------------------------------------------------------------
--------------------------------------------------------------------------------
------AATTGTGCACTGTAAAGGGCAAATCTT-ATGGTATTTGAACTACATCTCAGTAAAAACAAAAGCAAAAAGGTTC
TGTAGGCCCTTTTTTACGGTTCTTCCTTAAGCTCTTCACAACCCTTTGAATCGCCACCTTCACAAAAGAACACTGTGTTT
ATGTCATTTGTCCACGCATTTGTCCTATTTAAGTCAGTCTTAGTTGCTAT-TTAGTCACTTGGAATTTAAAAA-TTATTG
GTAGATCAAAAACTATAAATGCTGTGGGATTAACATTTCACATCTAGATGTTAGCTTCAAAGAATGGCAAATGGAAAACT
AAGGAACTTATTCTTTTATCTGAGTAGGGACTTTGGCTATTCCTCTC-AATATGTTAAGATGTA---TGTTG-CCGGGCG
CGGTGGCTCAAGCCTGTAATCCCAGCACTTTGGGAGGCCGAGATGGGCGGATCACGAGGTCAGGAGATCGAGACCATCCT
GGCTAACACGGTGAAACCCCGTCTCTACTAAGAAATACAAAAAAT-AGCCGGGC--------------------------
---GA-GGTGGCAGCGCCTGTAGTCCCAGCTACTCGGGAGGCTGAGGCCGGAGAATGGCGTGAACCCGGGAGGCGGAGCT
TGCAGTGAGCTGAGATCCGGCCACTGCACTCCAGCCTGGGCGACAGCGCGAGACTCCGTTTCAAAAAAAAAAAAAAAAAA
AAAAAAAGATGTATGCTGTTGTATTTGTGGTATTTCCCCTCCACAGTCCTGTCTCCTGAGAGTTGCTGTAACAGCTTTCT
TTCTATATGGATTCTTATGACAGTGACTGGGATGGATGGTGTTATCATATATCCATTGTTTGTTTCCTGGAGGGACTGAT
GTTCTTTTTTTTTTTTTTTTTTTTTTTTTTGAGACGGAGTCTCGCTTTGTCGCCCAGGCTGGAGTGCAGTGGCGCGATCT
CGGCTCACTGCAAGCTCCGCCTCCTGGGTTCACGCCATTCTCCTGCCTCAGCCTCCTGAGTAGCTGGGACTACAGGCGCC
CGCCACCGCGCCTGGCTAATTTTTTGTATTTTTAGTAGAGACAGGGTTTCACCGTGGTCTCGATCTCCTGACCTTGTGAT
CCGCCCGCCTCGGCCTCCCAAAGTGCTGGGATTACAGGCGTGAGCCACCGCGCCCGGCCGGGACTGATGTTCTTTGCATA
AGAGCTACATTCAACACTTACTGCCGAAGAATGATCTAGACAGAAAGATGCTAAACTTGAAAATTGATGCAAAAGTTAGA
TGAGATTTTAGGTTATTTCCCTTATAAAAGAGATACTTTGATTTTTAATGCTTTATGTAATAGTTTTATTATATTTGACC
ATTTTTATTTCTGAAAGAATGGAATGGTAGGTAGCTAAATGAGGGAATGAAGATGGCAGTTATTATTATTTTTAAAACTT
TTTTT-C-AGATTTTTT---------------------------------------------------------------
--------------------------------------------------------------------------------
--------------------------------------------------------------------------------
--------------------------------------------------------------------------------
--------------------------------------------------------------------------------
--------------------------------------------------------------------------------
--------------------------------------------------------------------------------
---------------------------------------------------------------AAAATTTTAGATTCAGG
AG-CACA-------------------------------------------------------------------------
--------------------------------------------------------------------------------
-------------------------------------------------------------------------CGTACAG
GTTTCTTATCAGGGTCTATTGCACAATGCTAGGGTTTGGGCTTCATGGTACTCATTATTTTTGTCTTGTCAATATCCATT
CCCCGTTTTTCTGGTAACAACACCTGGAATTACTCTTGAAAGAAAGACTAGCATGTCTATTTCTATGCTTGTACTTGTTT
AGACCTGAGAAAATCAGCACTATCGAGGATGAATGAGTTAATTATGTGTAAATCAGTGTATCCAACCCTTACGTCCCTAC
CAGCCACACTGTGATAATTTATTATTATTATTATTATTATTTTTTTTTTTTTTTTGAGACGGAGTCTTGCTTTGTCGCCG
AGGCTGGAGTGCAGTGGCGCGATCTCTGCTCACTGCAAGCTCCGCCTCCCGGGTTCACGCCATTCTCCTGCTTCAGCCTC
CCGAGTAGCTGGGACTACAGGCGCCCGCCACCTCGCCCGGCTAATTTTTTGTATTTTTAGTAGAGATGGGGTTTCACCGT
GTTAGCCAGGATGGTCTTGATCTCCTGACCTCGTGATCCGCCCGCCTCGGCCTCCCAAAGTACTGGGATTACAGGCGTGA
GCCACCGCGCCCGGCCACTGTGGTTATTTTAAGTTGGGCATCTGACCCAATCCTGAATGCTTGTGGGTGACAAAATTGTA
CTATCATTACAGTGAAGAGAAGTTGTCCCTTGTAGCAGAAAATAATACCAGTGAAGATAATTCAAATAAAAAGATTCAAG
TTGCTATCAATTAAAATCTGAGAATACAGTCAAAATATAGGGAAGAAATGAGAATTAATAGGCACAGAGAGGCCAGAATT
TTGACAGAGGTTTGAGCTTCCAGAGCCATCTGTGACTAAAGTAATACCTGTCTGGCCACAACCCTTACTTTCTTTCCAGT
TAAGGCAATTTTAGTTGTTGAACAACAAAACTATACTAATAAAGAGAGCAAACCCATTTATTTGGTTGTACAGCAGCTGG
TGTCATGAAAGAGT-AAGGCCAAATATATTGGTACATCTTGCTCAAAACAAAGTAACCCATAGTGGTGATGATGGGGGAA
TGCAGATGACTAACAGAAATTAAGGATGGACTGCCTTGATAAAATGTTTTAGTGTCTGGGACAGGGACTGAGTGAATATT
GATACCATTTTGACGATAGGGCATAAGAAAGGAAACA---TGGTTGGTGAATAGCTTATGTTTTAGATATTCTTAGTTAC
TAGTGCCCGTTTTTTCTTCTTTGCGGAATGTAGTATTGTACCTGTACAGAATGAAGTCTAGCTGCTTTTTCTCATGGTCT
AATAATGAGAGGCAGACAGACTTGGAAAAGAAGGGGGTTTATTTTTTCAACTGGTTACAGGGAGAAAGTTGGAGTAACTT
ATCAGACCAACTCAGAGTTACAAGATTTTTTT---CTGGAGCTTATATACATTTTAAGCTCTATGCCTTCGTGTGGGAGT
GCACCTACAAGCAGGAGTGTTTTATTCAATTTATATCTATCTTTAACTAGGGTTTGAGGTCTAGAGAGTTTTCTCTAGAA
TCTTGGAAAGTTTCTTAATCTTAAATGGGCCTTGGTACAAGGTGTATGTGTAAGAATGCTTTTATTATTCGATCAGACTT
TAGGGTATGAGAAAACCCAGGCAGGGTCTTTAAAGGGTTTGCTTTCGCATTTCAGCCCTGGTACTCAGGCA----CCAGC
TTTTCCAATTCTTTAATGTTTAACTTATGCATTCATCAAAATTATAGTAAAGGGATAAGGGAAACTGATTGTTCTGGTTG
CTGATGGAAACCTGACCTGCCACAGTATTATAGAAACATGATTACAGATAAAAGACAATGATTAGATATGTAAAGGCTGA
CAAAAAA-CAGCACCTATATATGAGCTAAAATTAAGATTAGAGGCTGGGCACGGTGGCTCACACCTGTAATCCCAGCACT
TTGGGAGACTGAGGTGGGTGGGTCATGAGGTCAGGAGATCAAGACCATCCTGGCTAACATGGTGAAACCCCATCTGTACT
AAAAATACAAAAAA-TTAACTGGGCGTGGTGGCATGTGCCTGTAGTCCCAGGTACTTGGGAGGCTGAGGCAGGAGAATCA
CTTGAACCAGGGAGGTGGAGGTTGCAGTAAGCCAAGGTTGCACTACTGCACTCCAGCCTGGGTGACAGAGTGAGACTCCA
TCTCAAAAAAAAAAAAAAAAA-----------GATTGGAAGAGGTTACGTTTAGGTGGTGGATACAGCAGGACTTTTCTG
TCTGTACATAAAACCATGTCATCTGTAAAAAGAGATAGATTTACTACTTTCTTTCCAATATAGATGCTTTTTTAAAAATT
AGTTTTTATTGGTACTTAATAAGTATATATATTTATGGGGTACATAGATTTTGGCAAAGGTGTATACAATGCATAATAAT
TACATCAGTCCATCAGGGTAAATGAGGTATATCCGTCACCTCAAGCATTTATCATTTCTTTGTGTTACCAACATTCAGAT
TATACTATTTTAATTATTTTAAATGCGTAATAAATTATTTTTGACTATAGTCACCCTGTTGTGGTATCAAATACTAAATC
TTATTCATTCTATCTAATTGCCAACATAGAGCCTTTTATTTCTTTTCTGTGACTAACTGCCCTGACTAGAACCTCCAATA
CCATGTTAAATAGAAGCAGTGAGAGCAGACATCCTTGTCTTTTCTGATCTTTGGGAAAAAGCATTCAGTTTTTCACCACA
AAGTATGATGTTAGCTGTAGGTTTTTCATAGATGTGTTTCATCAGGCTCAGGGACGTGTCTTCTATTCCAAGTTTGTTAC
CATTCCTGTTTTTT---TTT-TTTTTTTTAATGAAAGTGTGCTGAATTTTGCTGAATGCTTTTTTTTTCATGTCTATTGA
GATCATCATGTGGTTTTTATCCTTTATTTTATTAATATGGTATATTACATCAATTGATTTTTTT---ATGTTGAACCAAC
CTTGCATTTCTGGGATAAATTCTACTTGGCCATCAGGTATAATCTTTTTGCTGGATTGCCAGATTTGATTTTCTTATATT
TTTGTTGAAGAATTTTATATTTATATTCATAAGAGATATTGGCCTATGGTTTTCTTTTCTTGTGATGTCTTTGGTTCTTT
TATCAGGGTTCTTTTATCAGGGTAGGATGAGCCTCATGTAGTGAATTAGGAAGTGTTCCCTGCTCTTCTATATTTTTGAA
ATAATTTATGAAGTTTTGATATTATTT----TTAAACCTTTAGCAGAATTCTCCAGTGAAGCCATCTGGGTAAGGCCTTT
TCTCTGTAGGAAGTCTTTGATTTCCAACTTAATATCTTAACATGTTTTAGGCCTATTCATATTTTCTATGTGTTCTTTAA
TCAATATTGATAGTTTCTGTATTTCTAGGAATTTGTCTATTTCATTTCGATTATCTAATTTGTTGGCATACAGTTGTTCA
TCATTTTTATAATCCTTTTAATTTCCATAAGGTCAGTAGTAATATCCCATCTTTCATTCCCGATTTTTTTTTTCTTGGTG
TGTCTAGCTAAACGTTTGCCAATTTTGTTGACATTTTCATATAACTCACTTCTGATTTTTCCATTTTTTTT--CTATGGT
TCTT---TCTTTCATTAGTCTTACGCTAGTCTTTATACACTTTGACTCATGTTTTCTCTTTTCTTTCTAGGACATGAGTG
GAATCATGAAATGGTGCGTATGGGTGGCCAGGAGTGGTGCTTGTGAGTTATAAAGAAGTGTTTGTAGCTATTAGAGTTAT
TTGGTGGTCAA------CAAAAAAATCTCCCAGAGCAGTAAAATTTGGATGTAACTTTATCTTAAATTGCTGGTCCCAGA
TGAGTATTTGAGAATTCCATAACCTCTGAGAATGGACTCGATCCTATAATAGTAAATTCAGTGATTGAAGTTCAGAGCTA
CAGCCAGAAAGGATATTAAGGATGAGAGCTTTTACTGTCAGACTTCTGTGACTTCACTTGTTTAATTCATCCTCTGTCCC
TGCATCCAGCCCTGGATCTTTTATTTTATATGTGTTTGTCATATCACATGGAGGGCCTTGTCAAATCCTAAAATAGGGCA
TGGAGACGGCTCCTTTATATTTACTTTGCTTACTTAGAAATAGAAGGTACCAGATCATTATGCAAGGTT-----------
--------------------------------------------------------------------------------
--------------------------------------------------------------------------------
--------------------------------------------------------------------------------
--------------------------------------------------------------------------------
--------------------------------------------------------------------------------
--------------------------------------------------------------------------------
--------------------------------------------------------------------------------
--------------------------------------------------------------------------------
--------------------------------------------------------------------------------
-----------------------------------------------------CTCTTTAGATTTCCAAAAGCAGACTCG
AGCCTCAGGATGGTAGCTTTGACTCTGATGACGATAATTGATCTCTGCCTGTTCACACACTTTAGAAGCTCCTACGGAAA
AGTGTAGTCCTTGTTCCTTATGTTTACCATTGCCAACCTACTTGGAAACATCAAGTTTCTTACAAACAGATAAAATTCTA
AC-ATTTTTACTTAGGTAGTCATAACTTCTCCTTTGCCAAGTGTTCATGTTTCCCAGAGAATCCGAAATCTCAAATGTGG
GCCATCCCACTGGAGTTCAGGCTTTGAACTAGGGCACAGGCTCATAGGATTTCCCTACAGAGCCCCACATCACAGTCAGG
ATCTACAGCG----------------CAGAATACTACATCTCTGGCCCCTCCCAGAAGACCCACTGAGATGCAGTGAGTT
TTCCACATATCACTTACCATTTCTACAGGTAGCAAAGTATTTTCCTATGCATTGTTTTATCCAATTTTTTATTATTTCCA
TTAGAGATCAAAGGAGGGTTTAAT-ATTTTATTTTT--AAGGAAGAAACTGTACTTTCAAAAAATGAAGACCTTCCCAAG
GCCACCCAGAGGATAAGAGGGAAAGTAGACACAGTCACATTTCTTCTGGATCCAGGGTCAGGCTCTCCCTTCTCCACCTC
CTCAGGCTAAGGGAGAGGGATTCAAGTGCATCAGTGATGTGAAGGAGATGAAACCAGTGATGTGGGAGGGATGGACGCAG
GATGAAAGATGTGGGGGTCAGACAATTTTTATCATTCCTAGGAGTGAGATCTGGAGGCTGAAAAAGCCAAAAAAGGTTTC
CAAGAAACTGAAGACTGTATTCCGTGCTCCAGATCTGAGTAGGATGCTGCAAATGTTTAGAGGTGAGGAGAAGCA----T
AGACTGTGGATGTGGGATTGTTGTGGTGTCAGGTAATAAACTGTCTAGGTGGGATAACTTAAAATTGAGGACAGA-GAGA
GGAGGGAGGTCAGAAAAAAAGCAATATTCTGTGATGAAGAGGATACATTTATATGTAAGGAAAAGTGGCTAGGTCTTTGG
TTTATCTTTT-AATTCACTAGCTCACAGCTTCACGGTATTCCCTTCCCCTGTCCCTACTCCAAAGAATATATAGGTATCA
GTGCTTACTCCTTTGTTTCTAATCACCATCACTGAATCTTTTATTATTTCAGAACTGACAGCTGTCCGATGCTACTGGGG
TAAGAAAAAGTTACCGTCTTTAAATAACTGTGTTCCATTTACCTTCCAGAAGTTTATGG-------TTTCAATGATATCT
TCTGATCTTAGCCTCATGCATTCTTAGCACCTCCCAAAACATTTGCCTAATGCATTTCTCCAGTGTTTTACCCC-TCCCA
CAATTTCATCAATGCAAGTTTTTCAGTCACCTCTCAAGTTCCTTCATCACAATGTCACTAGATAAAC-TACTCCGT-ATC
TGTCACCTAGTCATATATATCACATAGATGATTA----CAT--TCATATATA-TACACA---------------------
-------------TTTTTTTTTTCTTGCAGCGGATGTCACACTGAATTCAGTCAACCTAAATTTGAATCTTGTCCTTTCA
GAAGATCAGAGACAAGTGATATCTGTGCCAATTTGGCCTTTTCAGTGTTATAATTATGGTGTCTTGGGATCCCAATATTT
CTCCTCTGGGAAACATTACTGGGAAGTGGATGTGTCCAAGAAAACTGCCTGGATCTTGGGAGTATATTGTAGAACATATT
CCCGCAATATAAAGTATGTTGTTAGAAGATGTGCAAATCATCAAAATGTTTACTCCAAATACAGACCTTTATTTGGCTAC
TGGGTTATAGGGTTACAGAATAGATGTAAATATAGTGCCTTTGAGGAGTCTTTGTCCTCTGATCCTGAGGTTTTGACTCT
CTCCATGGCTGTGCCTCCCTGCCGTGTTGGGGTTTTCCTAGACTATGAAGCAGGTATAGTCTCATTTTTCAATGTCACAA
GCCATGGCTCCCTCATTTACAAGTTCTCTAAATGTTGCTTTTCTCAGGCTGTTTATCCATATTTCAATCCTTGGAACTGT
CCAGCTCCCATGACACTATGCCCACCAAGCTCTTGAATTTTCTCATTTCTTCACCTACAACTCTTTGTCTTGACTTATCT
CCTGCAACTGACTCATCTGCAACATTCAGACCATTGCTTCCTTGTGGTTTCCCTTC-----TTTAGAACTTCTACTCATC
TTTGAGATGTACAGTATATTTGGCTTGAGTTATGAGAGATGCTTATTTATTCATTTACTCTTTTTCATATTTTCAGAGAA
AGTTACCTAATCCCTCCTAAAGACACAGTAGTATTGGTATAACATCCTTGCCTTCCCATTTGTCCGTATTTTGCTTTACC
ACTGATGTGAAGAGGCCCAAAGCCTGTTAGCCACCATCCATGCTACCTAGGTAGTCCATAGGAACCACCCTGATGACCAC
CACCACCATCAACTAAAGGTTCTTGGAGGGTATGTCAGTGTTTTGCTCAGGATATCCCAGATATATCAAGGAATTAAGGA
GAGGAAAATACAAGCAATATGTGTATTCAGAGTGAAGATTTTATGTCCAGAGTATTTGAGCTCTAACCCTGTCTCTTGTT
TTCTAATCATGATGAATACTTTCTCAGTTTCTTTTTCCTGAAATATAAATTGGGATTTAAG-------------------
---------------------------------AATGTACTTAACTATTAAAATCATTGTGTAAAACTAAGTGTCTCTGA
ATGTAATGCACTAATTTAGTGTCTGGAACATAATAAATATTTGCTCTCATGATTACTAAAAA
>Colobus_guereza_TRIM34
ACCCTGGCTTTTCTTCACCTCTTCAACCAGGAGCCGAGATTTCTGTTGGTCTGAAGGTGTGTGGTGAGGTTTGT-GGGGG
GTAGAGGGTATGAGACTCCAGGAGAAAAGTTCTCAATGAAGTTAGGAAAATTTGATTTATGGCCCCAAGGCTGCCCTGCG
CTGTCGGGAGCAAAGGCTGGCTTGCAGGCTTCCTGCTTTGAGTGCGCACTGAT------------AGCAGCCTAGAGTCT
GAGGAGGAACAGCCTTGAAAGCGGTGTTAAAGAGGCAGAAGGCCGCCTTTGTTTTCTGGAGTGTCTT-TTTTTT------
-CTCCAGGCTGAATCCAGTTCCATTCCCTTCCTATTGTATAATTTTGATTTTCTACCTTGCAAAGGAAACTGAATTCTCT
CTCT-------------CTCTCTCTCTCTT----------------------------------------------AAAG
AGATGAACAGAAGGTCTCTTATTTTCCACCTCCTCCT---TCCTCAAAAGAGAAGTTGGTGAGAGGAGGTCTCTGTTTTC
CAAGTGTGTGCAGGGCTTAGCTCCTAGTATGCAGCATCAGATAGAATGGAGCCA---TGGGGGCATGACCAGTGGGAATA
TTGAAGCGGGTTCTTTCGCTGCCCTCCTGGCAACCACTAAGCGGCTTTCTGAGGCCATCCTCACGTATTCTTAGTCCTTG
GCCTGCCTGACTAGAGCAGGTTGAGTGATCTGACTGCTGCACACTGCTCTGTTGCCTCTTACCCTGTGTCTTTCTGCAGG
TCATCTCAGGGCTTTCTTTGCACATCCCTGAACATAC-TG----------------------------------------
--------------------------------------------------------------------------------
--------------------------------------------------------------------------------
--------------------------------------------------------------------------------
--------------------------------------------------------------------------------
--------------------------------------------------------------------------------
-----------------------------------------------------TTTACTTTTACTTCAGTAACCCATGTG
CCACCAGCGTCTTCACCTGTCTCAGAACTTGTTCCTCATCATTCTTCCTCTTAGACACACGTTTGCATTGATTTATAACC
TCAATTTCTTA-TTGCTTTTCTTTGCTCACAACTACTTAACAGAAGTTGTTTATTGTGGGCTCAGAAGGAGCCCACAGAT
TTAATCTTCCTGTT------------------------------------------------------------------
---------------------------------------------------------------------------AAGAA
TTTGACATA-CAGTATGTCCTATCTTAAGCTCACTTGTGAGCAATTTG----CACCTTGATTGATATGTTACAGATATTC
TGACACATGTCATTCTGGCCTCTGCTCTCACCCCTCAGAGTTCACTGAAACTGCCATCCT----------------CCTG
GGTAGAATCCACGTCTGCCTACATACTGACTGTCTCCCAGTGGCATCTAGTCAGGCACGAGGCCCAA-TATATGGGATAA
TACTGATTATAAAGGAGGCTGCTGATGTAAAAATGTGCAATTAGCATCCATTCAGCATTCAGTAAAT----ATGAAATAT
ATGTGGAAGCCTACATTCTAATTAGACAGCAATCATAGACCATATCAATGAATGATAGAGTACACAAGAAGATGACTAAT
ACTATGGAGTAACATCTAT-------------------------------------------------------------
--------------------------------------------------------------------------------
--------------------------------------------------------------------------------
--------------------------------------------------------------------------------
--------------------------------------------------------------------------------
--------------------------------------------------------------------------------
--------------------------------------------------------------------------------
--------------------------------------------------------------------------------
---AAGAAGTTAAATTAGGGTAAGGACTCTGTAAAGACCTCATAAAGGCCTTG---------------------------
--------------------------------------------------------------------------------
--------------------------------------------------------------------------------
---------------------------------------------------------------------CAACTTTAAAT
AGTTTTTATGAAAGTTTTAAATAGTTTTCATTGTAAGAAGAACACTTTTGACTAGAATCTTAAGAATTCTATTCAGAATC
TAAAGTCTTTAAATGGTTTTTCCC-TGCACTTAAAAG---AACAGTGTGGATACGGAAGGTTGAGATGGGAGTGTGCAGG
GAGAGTAATAAAAGGTGAGCTCTGGCCAGAAGCGGTGGCTCATGCTTGTAATCCCAGCACTTTGGGAGGACAAGGCGGGA
GGATCACCAGAGATCAGGAGTTCAAAACCAGCCTGGCCAACGTGGTGAAACCCTGTCTCTACTAAAAAAATGCAAAAATT
AGCTGGGCATGGTGGTGGATGCCTGTAGTCCCAGCTACTTGGGAGGCGGAGGTAGGAGAATCGTTTGAAGCCGGGAGGTA
GATGTTGC-------CGAGATCTTGCCATTACACTCCAGTCTTCCAGCCTGGGGAACAAGAGTGAGACTCTATCTCAAAA
AAAAAAAAAAAAAAAAAA----GATGAGCTCTGAGGATTGAGACAGTGGGAAGGGATGTGCAATGTGGACCTAACTGGAC
CATTATGAAGTCTGGCCTCACTCTGGATAGCATGGGTTTGAACAGAAGAGTGACATGAT---TGACATCT-GCTTTAAGG
TGATCACTCTGTTTACTGATGTAAGAACAGAGATGAGAGCAGAGTGAAGAAGGGCAGTCATGGCTGGGCACAGCAACTCG
TGCCTATAATCCTAGCACTGTGGGAGGCCAAGGCAGGTGGATCACTTGAGATGGATCATGAGTTTGAGACCACCCTGGCC
AAGATGGTGAAATTCTGTCTGTACTAAAAATACAAAAATTAGCCAGGCGTGGTAACAGGCACCTGTAATCCCAGCTACTC
GGGAGGCTGAGGCAAGAGAATCATTTGAACCCAGCAGGCAGAGGTTGCAGTGAGCCAAGATCACGCCACCACACTACAAC
CTGGCTAACAAGAGCGAAACTCTGTCTCAAAAAAAAAAAAAAAAA----------GGAAGGGCAATGATAGTATCAGCAA
GACTAGTTGAAGAACAATTTCCTGAATTCAGGTGGTTTCTACCGGAGTGGTGGCAGTTGAGGTGGTTGGAA-CTAATTTG
AAAAAAAAA---------CTCTTTTAGCATATTCTCATGAGGTAACAGACAGAAAAAGACAAGATTAGGTGTTGCTTAAT
GAAAATGATTCTATGTTTAAAAAAAAAA------------CTTTTGGGAAATATATTGACCAGAACACTACAGCTCTTGG
GGAGAGAGTCACTAATGTGGTATAGATTGAGCCCTGGACTCTAAGGAGTAGCTGAAGCAAGAACTCAGTACATCGAGGAA
TGGGGAGGAGATGTTACGATGTTTCTGAGCTCTCCAGGCCTCTGGATGTCAAAACAGGCTCTACTTTCCTTACTGGCAGT
TTCTGACCAAGGAACCAGAAGGAGTGTCTAGGATATTGTCTAGAAACTTCAAAAGACATCCTCCCC-TAAAAGTCACTCT
TAGACATACTCTAATTTTACTATCTA-CCTGCAAAGAGACTTA-AAGTTTGCATTATCATATCCAGATGTTAGGAG----
-----------AAGACTCAAAAGAAGGGTACAATCACCTGGCAGCTATGGTAATCAGGTAACCTGGGAGTTCTGTCAGGC
CCATGGCACTCGTGTTCCCTTCTCTACCTCCCTGACTGCTGCTG---GGCTTGAGCCACATTGGGAAGTGGTGGGGTCAT
TTCTCACACATGGGACCCTGGT-CCTCTGCACTTTTCTTATTCTTTTGTTATTATGGTGGCAGCAGCTTTGGCATCAACA
CGCAGCCTCACTGTGAACATGAAGTCACAGCCCGTGGCAGAATGCATGTTCTACTGCTTCCTCTCGTGGAGTCCCCCGGT
ATTTCTAACTATTGGTTGGATACTGATTGGAATAAAAGATAACAAAGAACCCCACATCTGTGGTTGGCTCATA-GCTTTA
GCCATAAACAGGAGTGAATATTATCATATCATGTAAACTCCTGGTCTTACTAGTCATCAGATCCTGGTCTGACCAATGGT
CATTGCAGCCAGGGG-CTACCAGTATATCTCTTTTGTATGATTTTTAGTATCTGTACCATTGGCTGGATGACATTCACCA
GCCTACTTTCAGCCTTTTTTCCTCCTTAAGGTCTTTTGATGGATGGTTAGAGGAATAGACAGGTCTCGAGGCCTAGATTT
ATCTCCATATAGCTTTTTATCGTACCCCATCCTTTTGCCAAGTGTAGGAAAGATTCCTAGGTTGTCACACATTCACAGAT
CTTTCTTTC----ACTATCAAACCTGTTCAATTATATTAGTTTCCTAGCACTGTTGTAACCAATTATCACAAACTAGATG
ACTTAAAACAATAGGAAT--------------------------CTATATCACAGCTCAGGAGTCCAGAAGTCCAAAACC
AAGATGGTGGCAAACTTGATTTTTTT----CAGAAGGCTCTATGTGAAAATGGGTTCTATTCCTCTCCCCTAGCTTCTCG
TGGTTTCTAGCAAACCTTGGCATTCTTTGGCTTATATCTGTGCTACTTCCGTCTCTGTCTCTATTGTCACATGGCTTTCT
TTCCTGTGTGTTTGTATGTCCTCTCCTCTT---ATAAAAACACAGGTCAAGGCCGGGTGCAGTGGCTCATGCCTGTAATC
CCAGCACCTTGGGAGGCTGAAGCAGGTGGATCACCTGAGGTCAGGAGATTGAGACCAGCCTGGCCAACATGGTGAAACCC
CATCTCTACTAAAAATATAAAAC-TTAGCTGGGCGTGGTGGCATATGCCTGTAATCCCAGCTACTCAGGAGACTGAGGCA
GGAGAATCGCTTGAACCTAGGAGGCGGGGGTTGCAGTGAGCCAAGGTTGCACCATTGTACTCCAGCCTGGGTGACAGAGC
-GAAACTCCATCTCAAAAAAA--GAAAAAAA-CACAGATCTTTAAATTTAGGGCCTGTCTTTATCCAGTATGACCTCATC
TTAACTTGA------TTACACCTGCAAAGATTTAGTTTTCAAATAAGGTCATATTCATATAAGCAAACATATTTTTGTGG
AGGGTATAACTCTATCTACTAGAACAAGTATCAAAATGTTACTTACTGCCTACTGAGAGCCACCCTTTTTCCTTTTGCCT
CACAGTTTCTTGTCTAAACGGACCTCAGGTTCTGAGGATTGGTATTGTATCATCATGCCACTACTCTGTGGTGC-ACCCT
CTGGCTGACCACAAGCAATAATTGCAGGTTTCTTTTGCCATTTGCACTCATGCAGCTTAACTCCGCAGGGGGAATACAGG
ACAGGAGATATAGCATGCAGGCAGG----GCTGCTTCAGGTAAGCTCTCAGTGAGGATTTTTTTTTTTTTTTTTCTT---
---GACAGGGTCTCGCTCTGTTGCCTAGGCTGGAGTGCAGTGGCGCCATCTCAGCTCACTGCAAGCTCTGCCTCCCCTGT
TCACGCCATTCTCCTGCCTCAGCCTCCCGAGTAGCTGGGACTACAGGCGCCCACCACCATGCCTGGCTAATTTTTGTATT
TTTAGTAGAGATGGGGTTTCACCTTGTTAGCCAGGATGGTCTATATCTCCTGACCTCGTGATCTGCCAGCCTCAGCCTCC
CAAGATGCTGGGATTACAGGTGTGAGCCACCGCGCCCGGCCTCAGTGAGGATTCTTACGTTGGTACAAGACCATGCG---
-----GATGTGTGTGAAACTAACGTAGCTTAGATAAATCTTACATCAACAGACTGATTCCCTTGTAAAGACCATGAACAT
AGCTTCCAGAGCCCTACAGAGAATATTTTGTTACAAGAGTCTCAGCCCTCTTACGGAAGATGAGGTCTGTGCTTACCAAA
A---------------AAATAAAAATGAAATAATATACCAGGGGATGGTGATGGGGATGTCTTTTTTATAGGAAGGAAGG
ACTT-AAGCCTAATGATATCCCTTTTTTCTCCCACATGTCTAGTCTGACTTCCAATCTTATTTCCTTTACCTCACCCTAT
TTCCCACCCTCATCTGCTTCTCTCTATTTCCTCTGTTAACTTGTCCTGCATCCTCCCATCCCTGCCCTCACCTCCTATTC
ACTGGAAAGAGACTGTCACTTTTACTTCATTTAGGAAGTGTCACATATCCAGGTTCCTCTAGGCTCATGTGATGCCAAGG
-CCTAGGGCTTTTTGCATACCAACCACACATTTAAAAACTTTCGAAGATGTTATGATGCTACGTCCTCCATGAAT----G
GGGCATTCACTTACATAATTCCTTCTACCTAAAATATTTGTTTTCTTTCTCATTCTGTATTCCTTTCTTATTATTCAGCT
TTCATT-AAACTCTTACTTATCCA-GCAAGGTATCTTGGATAGTTCTCTACTTAGCAAATTATTTGATTTTCTAAAAACC
TATACCTCTCTATGATGGTGTTTTTT-ATACCTTCATAGGTGTAATTTTTACTATTTTACACTTTATGAATGATTATATA
ATTAACTTCTATCTTATTTAGGTGACTATTTACTTTATTCTGGCTAATACCATCTGTTCAT-ACTCAACTTTGAATTTTA
ATCCATTTCCTAGATTTTAATCACAGAAGATAATATGTCTTCAGTGAGAATTTCCAAAATAAACACAGGAATAATTGGCA
TTCAATTAGTGGATGTGGATTTAACACAGACAGAA---CTTCATTGCTCCTAAATGTAGTCTCCCCTTATATATTGGGAC
ATCTCTCCCATGACCAACAGCCATCTCCTTGGTATTTCTATTCCTCAATGATCTGACATTGGTATGAATCTGTGATCTAT
GTGTAATTCAGCTGGTTACACCTCCTCCCCCAACAAATACACACCTTTGGCTTCCTATCAACCTCTATAACATCCTT-CA
TGGCAAGATGAAATC----CTACCATCTATAAACACAAGACCCCCT-AGAAATTCCCAGCTTATGTGGTTTCCTCCATTT
CTACACTCTCATAACACTGGATCCCAATCTACTTCTTTCAGGCTTTACCTCTGCTTTTCTTTGTTTAAATAAGTGGAGTA
GCATGGAGACCTCTGAAAGAGAACTCTGAGGATATTATGGTCACTCCAATTCTACCTATTGAATTGGATGATCTTTGTAA
GTCATTTAATTTTATTTATTCATCTGAA-GAAAGGGAGTACTCTTATTT-------------------------------
--------------------------------------------------------------------------------
--------------------------------------------------------------------------------
--------------------------------------------------------------------------------
--------------------------------CTCAAGAATTTTTGAAGGAGGAACAAATAGGCCAAAGTGATTTTTAAA
TTGTAACTGGTAATGAAATTTCCATATTATGGTCATTGCTGTTTCTGTGAGTATCTCTGGAAAGTGTGTGAGGGCATGGG
AGGATTTTGTGTGGGTGGATGTGTTAGAAGGTGAGCACTTCTTCACTGGAAACCACATCTGGGGTTCCAAAGTTCAGCTA
TTGAAGAATTTCCGAATAATGG---GAA-AGAAAAATGAAACACT-----------------------------------
--------------------------------------------------------------------------------
------------------------GATAAA---GTTTT---------------AGTCGTCTATGG-AGAGACAGGGA---
TTTTTT--GTTATATATTTATCAAACATTGTGCTTCTCTGTGTTCTAAACACTGAGGCTATAGCAGTAAA----------
------AAAACAAAAGTGCCTAATCTATGTGTAGATTATATTTTAGAAAGAAGACATAGACATTTTAAAATAGGTACTGA
TAATA---------------------------------------------------------------------------
--------------------------------------------------------------------------------
--------------------------------------------------------------------------------
-----------------------------------------------------------------------AGAGAAAGA
TGGCAAATGTACGCTGAATGATGAGTTTGTGGTTGTGCTGTAGTTAAGTTTGTCTTATCAGGCCCTTCTG-TGAAGGGAC
ATGTAAGGAGAAAGTTGAAAAAT---ATATAAACGAAAGTTATGCAAATAGCAACAGGAGGGTAATTCTAGGCTGAGTAA
TGAATAAGTGCAAAAGCCTTGAGGTATTAACAGCTTGCCCAGACCACTTTCAGCCATTGTTGGTTTCTCTTCCTCATCTT
T----GTTCTTTAATGTTGCAGTCTTGGCCAGTCTTTGATGTGTGCGCAATTAGAATGCTTTTTATTTATACCATTCTTA
TACCATCCCCTTTCAATCTTCTCAGCCATCCAGAGGTCTTTAACCA-GAAGAGAGAGGAGAGCCTCAGGAGTTAGGACCA
GAAGAAGCCAGGGAAGCAGTGCAATGGCTTCAAAAATCTTGCTTAACGTGCAAGAGGAGGTCACTTGTCCCATCTGCCTG
GAGCTGTTGACAGAACCCTTGAGTCTAGGCTGTGGCCACAGCCTCTGCCGAGCCTGCATCACTGTGAGCAACAAGGAGGC
AGTGACCAGCCTGGGAGGAAAAAGCAGCTGTCCTGTGTGTGGTACCAGTTACTCATTTGAAAACCTACAAGTTAATCAGC
ATCTGACCAACATAGTGGAGAGACTCAAGGAGGTCAAGTTGAGCTCAGACAATGGGAAGAAGAGAGATCTCTGTGGTCGT
CATGGAGAGAAACTCCTACTCTTCTGTAAGAAGGACAGGAAAGTCATTTGTTGGCTTTGTGAGCGGTCTCAGGAGCACCG
TGGTCACCACACAGTCCTCATGGAGGAAGTATTCAAGGAATGTCAGGTAGGGCCCTAGATGGAGGGAGTTGGGGCAGAAG
ATGGTAGTTGGTGGAAAGTCTCACCCTTTCATCCTTCTTTTTTTTGTTGTT-------------GAGACGGAG-TCTCAC
TGTGTCACCCAGGCTGGAGTGCAGTGATGTGATCTCTACTCACTGCAACCTCTGCCCTCCAAGTTCAAGAGATTCTCCTG
CCTCAGCCTCCCGAGCAGTTAGGATTATAGGCACCTGCCACTGCGCCGAGCAATTTTT----------------------
---------------TTTTTAGTAGAGATGGAG-TTCACCATCTTGGCCAGGCTGGTCTTAAACTCCTAATCTCACAATC
CACCCACCTCGGCCTCCCAAAGTGCTGGGATTACAGGCGTAAGCCACCGTGCCCAGCCTTTTTTTTTTTTT---------
------GTGAGCAATAAAGGTTTTTAATTACCTGGGTGCAGGCAGACTAAGTCAGAAAAAGGAGCCAGCCCTTTTCATCC
TTCTTTACCCCTTGTGGAACCATAATTCTGAGTCCCTTGATCATCTCCATGTATATCTTTCACCCTGTGCTCAGCTTCCA
ATGCCTGGGGCACATTCCTGCATATTCCTTTGATTTACATAACAGATGATCCTAGAGTACAGTCTCTTAGCCAAGAGTGA
GAGATTTTTGTTTTGTTTTTTCCTTTTTCATTGTATAGGTGATAAATTCCTTCCTAAA-TTAGCTCTCTTGCTTCTCTAA
GCAGGATAATTGCTCAGGAACATTGTGGATTGAACGAGGAAAGAGCATTGATAAGAGGAAAGGATTTTCCTTTCTGCAGG
GTAAATACTTACTCTAAGGAAAGAGAGAATCAGGCTACTCCTCTTGA-GGGGCATTGATTTTCATCAC-AATGAATAAAC
AATACATTCATCTCCTCAAATTTTTCCCCATGTCATAGATTCTAATCACCAGCTTCACAGTTTCTGTAAATTGCTTTTTT
TCTGGGATCAACTTGATTTTTTCTCTGTT-GTCCTCTATCCAGATACTGAGAAAGCTTATAGCTTGACTCTAGTGTGATT
CCCTTCTCATAGGAGAAACTCCAGGCAGTCCTCAAGAGGCTGAAGAAGGAGGAACAGGAAGCTGAGAAGCTAGAAGCTGA
CATCAGAGAAGAGAAAACTTCCTGGAAGGCAAGAGGAGATTCTGAAGGATTTCTGAGACAGGAATCTTGACAGGACCTTA
ATCCGAGGAGGCCTCATCCTTTT-ATTCCTTGACATTGCATGAGTCCTGAAGCCATTTGATTAGTTCCCTTCTCTGTCCT
GTCCCTGTTGGGGGTGGAGGCTAGAAAGTGGACATGTTACAATT-ACACACACATAC-TGAAACTAAGCACAAAGATGGA
CTCTATGATGAGGAAGGCTAGCAAATA-----------------------------------------------CTGTGT
TCCATTGCTCTTTTCCTATGAGGCTCTACTACTTCTGGTGGAATACACTATATAAAGGACTACAGTTTTCCTCAGGATTC
AAATTAGGAGTGTGGTAAGGCAGGCAGTCATGAATATCCAGGAAAGTGGTCTAGAAGCTAAGCCTTAT---GTTTTACAT
TTTGTCTGAGGGTTAGCCTAGATAAGACAGTTTGAGGTCATTGTTTTGGTAAGTACTGAAAGGAAAATAGTAGGAAAAAA
TAGCTTCCCTCTAAGTACCTCTATTG------------------------------------------------------
--------------------------------------------------------------------------------
--------------------------------------------------------------------------------
--------------------------------------------------------------------------------
-----------CTTC----TACTCC-TTGCTGATTTGAACTCCCTGAAAAAAAAAAAAAGTATCTATATATAGATAATAT
AGGTATATATATATATATACAGATATACAGATAATAATATAAATACACACACACATA----------------------T
GTGTCTGTGTGTGTGTGTATTTCCCTACTGGCTCCTAATCCCTTGCACAATAGGCCCTTAGCCTGACAAACTTATTACAT
CTCTCTCTTGTCCATCCTTGCAGTATCAGGTACAAACTGAGAGACAAAGGATACAAACAGAATTTGATCAGCTTAGAAGC
ATCCTAAATAGTGAGGAGCAGAGAGAGCTGCAAAGATTGGAAGAAGAGGAAAAGAAGAGGCTGGATAAGTTTGCAGAGGC
TGAGGATGAGCTAGTTCAGCAGAAGCTGTTGGTGAGAGAGCTAATCTCAGATGTGGAGTGTCGGAGTCAGTGGTCAGCAA
TGGAGCTGCTACAGGTAAGAAGGTTCGCTCAATCTGAGATTCTGGGAACACAGTT---------CCCTTCTATGTCCTTG
CGTTCTCATGCTGGCGGTGACACTAAGGGGTTTCTTTGGCCTTGCGGTGCTGCCTTGTCATCCATTCTAGATGTCATGGA
CATGAATGA-------------------------CATTTTTATTAATTTATGAAGTAAGGGAATACATTTTACCTTGCAG
AGAAGATCCATGATATCTAATTATAATCTCTAGGCCCCTGTTATATGTGATCTAGTGTCGAGCATTCACCAGACTTCTCT
TTACTCGGATTAGTCACAGGTAAACACAT---GGATTTTCAGGTTTAAGAGCATACACATTTAAGAAATGTGTTCTATTT
AAGTTTAAAATATGCTTATTTGTT--------------------------------------------------------
--------------------------------------------------------------------------------
--------------------------------------------------------------------------------
--------------------------------------------------------------------------------
---------------------------ATTGTAAATGTTCCCTGTTAATTTTTTTTTTTTTTTTTTTTTTTTTGAGGCGG
AGTCTTGCTCTCTCGCCCAGGCTGGAGTGCAGTAGCACGATCTCGACTCACTGCAAGCTCCGCCTCCGGGGTTCATGCCA
TTCTCCTGCCT-AGCCTCCCAAGTAGCTGGGACTACAAGTGCCCGCCACCATGCCTGGCTAACTTTTTTTGTATTTTTAG
TAGAGATGGGGTTTCACCGTGCTAGCCGGTATGGTATTGATCTCCTGACCTCATGATCCACCCACCTCGGCCTCCCAAAG
TGCTGGGATTACAGGCCTGAGCCACCATGCCCAGCCCCCTGTCAATTTTTTTAAAACATAAAGTGATAGAATATTGAGCC
TTTTGGGGAGACAGATGGACAAATATATAGACAGACAGTGCTTTCCTTTCTTTGCTGAATTTCCAAATATTTCCTTTTTA
AGATTTGGAACGAAGCAGGAGAGTAACTGATTTTCATTTGTTGAATTGTTTCCTTTGTCTCTGGTGCTTATATCCCAGCT
TTTTAAAAATTCCTTTTTTCTTTTGTCTTCTT-TTCTTGTTTAAATTTCAGATTACTCTGGAACAGAAGTTTCTAAACAT
ATTTTACACTCATTAGTATGGCTATAATTAAAAAA-GATGTACAATATCAAGTGTTGGGGAAGATGTGAAGAAATTGAAA
CCTTCTTGAATTGCTAGTAGAGATGTAAAATA--GTAAAGCTACTTAG-AAAAACTGCTTGGCAGTTGCTCAGAAACGTA
AAGAGAGTTCTCA-TGTGGCCTAGCCGTTCCATTCCTACCTATATACCTGGAAGAACTGAATACATATATCTGTGCATAA
ACTTATATATGAAAGTTCACAGCAGTATTGTTCAAAAATAAAAACAACTCAAATCTCCTTAA-CTGATGAATGAATAAGC
AAAATGTGTTATAGCCAAACAATGTAATATTGTTTAGCTATGAAAAATAATGAATTAATAATACATGCTATGACATGGAT
GCACCTTGAAAACATTAT---AAATGAAAGAAGGCAAGCACAAAGTTCTTTTTTGTATGATTCCATTTATATGAA-----
-----AGTCTGTAAGTAGCAAATCCATAATATAGAAACTAGATTAGTGGTTGCCAGGGCTCTGGGGAAGAATTAATAGGA
AGTAATTGCTAATTAGTGTACAATTTCTATTTGTAGAGATGAAAATGATCTGGA-TTTACTGTGCAAGGATGGTTGCACT
ACATCGTGAATATATTAAAACCTGTTA-----------------------------------------------------
--------------------------------------------------------------------------------
--------------------------------------------------------------------------------
--------------------------------------------------------------------------------
------AATTGTGCACTGTAAAGGGCAAATCTT-ATGGTATTTGAACTACGTCTCAGTAAAAACAAAAGCAAAAAGGTTC
CATAGGCCCTTTTTTATGTTTTTTCCTCAAGCTCTTCACAACCCTTTGAATCGCCACCTTCACAAAAGAACA--GTGTTT
ATGTCATTTGTCCACGCATTTGTCCCATTTAAGTCAGTCTTAGTTGCTAT-TTGGTCACTTGGAATTTAAAAA-TTATTG
GTAGATCAAAAACTATAAATACTGTGGGATTAACATTTCACATCTAGATGTTAGCTTCAAAGAATGGCAAATGGAAAACT
AAGGAACTTATCCTTTTATCTGAGTAGGGACTTTGGCTATTCCTCTC-AATATGTTAAGATATA----------------
--------------------------------------------------------------------------------
--------------------------------------------------------------------------------
--------------------------------------------------------------------------------
--------------------------------------------------------------------------------
-------------TGCTGTTGTATTTGTGGCATTTCCCCTCCACAGTCCTATCTCCTGAGAGTCCCTGTAACAGCTTTCT
TTCTATATGGATTCTTATGATGGTGATTGGGATGGATGGTGTTATCATATATCCATTGTTTGTTTGCTGGAGGGACTGAT
GTTC----------------------------------------------------------------------------
--------------------------------------------------------------------------------
--------------------------------------------------------------------------------
------------------------------------------------------------------------TTTGCATA
AGAGCTGCATTCAACACTTACTGCCAAAGAATGATCTAGACAGAAAGATGCTAAACTTGAAAATTGATGCAAAAGTTAGA
TGAGATTTTAGGTTATTTCCCTTATAAAAGAGATACTTTGATTTTTAATGCTTTCTGTAATAGTTTTATTATATTTGACC
ATTTTTATTTTTGAAAGAATGGAATGGTAGGTAGCTAAATGAGGGAATGAAGATGATAGTTATTA---TTTTAAAAACTT
TTTT--C-AGATTTTTT---------------------------------------------------------------
--------------------------------------------------------------------------------
--------------------------------------------------------------------------------
--------------------------------------------------------------------------------
--------------------------------------------------------------------------------
--------------------------------------------------------------------------------
--------------------------------------------------------------------------------
---------------------------------------------------------------AAAATTTTAGATTCAGG
GG-CACA-------------------------------------------------------------------------
--------------------------------------------------------------------------------
-------------------------------------------------------------------------TGTACAG
GTTTCTTATCAGGGTCTATTGCACAATGCTAGGGTTTGGGCTACATGGTACTCATTATTTTTGTCTTATCAATATCCATT
CCCTGTTTTTCTGGTAACAACACCTGGAATTACTCTTGAAAGGAAGACTAGCATGTCTATTTCTATCCTTGTACTTGTTT
AGACCTGAGAAAATCAGCACTATCGAGGATGAATGAGTTAATTATGTGTAAATCAGTGTATCCAATCCTTACGTCCCTAC
CAGCCACACTGTGATAATTT----------------------TTTTTTTTTTTTTAAGACAGAGTCTCACTTTCTCGCCT
AGGCTGGAGTGCAGTGGCGTGATCTCTGCTCACTGCAAGCTCCGCCTCCTGGGTTCATGCCATTCTCCTGCCTCAGCTTC
CTGAGTAGCTGGGACTACAGGCGCCTGCCACCACACCTGGCTAATTTTTTGTATTTTTAGTAGAGATGGGGTTTCACCGT
GTTAGCCAGGATGGTCTCGATCTCCTGACCTCATGATCCGCCCGCCTCAGCCTCCCAAAGTGCTGGGACTACAGGCGTGA
GCCACCACACCCAGCCACTGTGGTTATTTTAAGTTGGGCGTCTGACCCAATCCTGAATGCTTATGGGTGACAAAACTGTA
CTGTCATTACAATGAAGAGAAGTTGTCCTTTTTAGCAGAAAATAATACCAGTGAAGATAATTCAAATAAAAAGATTCAAG
TTGCTATCAATTAAAATCTGAGAATACAGTCAAAATATAGGGAAGAAATGAGAATTAATAGGCACAGAGAGGCCAGAATT
TTGACAGAGGTTTGAGCTTCCAGAGCCATCTGTGACTAAAGTAATACCTCTCTGGCCACAACCCTTACTTTCTTCCCAGT
TAAGGCAATTTTAGTTGTTGAACAACAAAACTATACTAATAAAGAGAGCAAACCCATTTATTTGGTTGTACAGCAGCTGG
TGTCATGAGAGAGT-AAGGCCAAATATATTGGTACATCTTGCTCAAAACAAATTAACCCATAATGGTGATGAGGGGGGAA
TGCAGATGACTAACAGAAGTTAAGGATGGGCTGCCTTGATAAAATATTTTAGTGTCTGGGCCAGGGACTGAGTGAATATT
GATAACATTTTGACAATAGGGCATAAGAAAGGAAACA---TGGTTGGTGAATAACTTATGTTTTAGATATTCTTAGTTAC
TGGTGCCCTTTTTTTCTTCTTTGTGGAATGTAGTATTGTACCTGTACAGAATGAAGTCTAGCTGCTTTTTCTCATGGTCC
AATAATGAGAGGCAGACAGACTTGGAAAAGAAGGGGATTTATTTTTTCAACTGGTTACAGAGAGAAGGTTGGAGTAACTT
ATCAGACCAACTCAGAGTTACAAGACTTTTTT---CTGGAGCTTATATACATTTTAAGCTCTATGCCTTCGTGTGGGAGT
GCACCTACAAGCAGGAGTGTTTTATTC--------------TTTAACTAGGGTTTGAGGTCTAGAGAGTTTTCTCTAGAA
TCTTGGAAAGTTTCTTAATCTTAAATGGGCCCTGGTACAAGGTGTATGTGTAAGAATGCTTTTATTATTCGATCAGACTT
TAGGGTATGAGAAAACCCAGGCAGGGTCTTTAAAGGGTTTGTTTTCACATTTCAGCCCTGGTACTCAGGCA----CGAGC
TTTTCCAATTCTTTAATGTTTAACTTATGCATTCATCAAAATTATAGTAAAGGGATAAGGGTAACTGATTGTTCTGGTTG
CTGAT-CAAACCTGACCTGCCACAGTATTATAGAAACATGATTACAGATAAAAGACAATGATTAGATATGTAAAGGCTGA
CAAAAAA-CAGCACCTATATGTGAGCTAAAATTAAGATTGGAGGCTGGGTGCGGTGGCTCACACCTATAATCCCAGCACT
TTGGGAGACTGAGGTGGGTGGGTCATGAGGTCAGGAGATCGAGACCATTCTGGCTAACCTGGTGAAACCCCGTCTCTACT
AAAAATACAAAAAAATTAACTGGGCATGGTGACATGTGCCTGTAGTCCCAGGTACTTGGGAGGCTGAGGCAGGAGAATCA
CTTGAACCGGGGAAGTGGAGGTTGCAGTAAGCCAAGGTCACACTACTGCACTCCAACCTGGGTGACAGAGTGAGACTCCA
TCTCAAAAAAAAAAAAAAA-------------GATTGGAAGAGGTTACATATAGGTGGTGGATAGAGTAGGACTTTCCTG
TCTGTACATAAAACCATGTCATCTGTAAAAAGAGATAGATTTACTACTTTCTTTCCAATATAGATGCTTTTTAAAAAATT
AGTTTTTATTGGTACTTA---------TATATTTGTGGGGTACATAGATTTTGACACAGGTGTATACAATGCATAATAAT
TACATCAGTCCATCAGGGTAAATGAGGTAT--CCATCACCTCAAGCATTTATCATTTCTTTGTGTTACCAACATTCAGAT
TATACTATTTTAATTATTTTAAATGCATAATAAATTATTTTTTACTATAGTCACCGTGTTGTGGTATCAACTACTAAATC
TTATTCATTCTATCTAATTGCCAACATAGAGCCTTTTATTTCTTTTCTGTGATTAACTGCCCTGACTAGAACCTCCAATA
CCATGTTAAATAGAAGCAGTGAGAGCAGACATCCTTGTCTTTTCTGATCTTTGGGAAAAAGCATTCAGATTTTCACCACA
AAGTATGATGTTAGCTGTAGGTTTTTCATAGATGTGTTTCATCAGGCTGAGGGACCTGTCTTCTATTCCAAGTTTGTTAC
CATTCTTGTTTT--------ATTTTTTTTTATGAAAGTGTGATGAATTTTACTGAATGCTTTTTTT--CATGTCTATTGA
GATCACCATGTGGTTTTTATCCTTTATTTTATTAATATGGTATATTACATCAATTGTTTTTTT----ATGTTGAACCAAC
CTTGCATTTCTGGGATAAATTCTACTTGGCCATCAGGTATAATCTTTTTGCTGGATTGCCAGATTTGATTTTCTTATATT
TTTGTTGAAGAATTTTGTATTTATATTCATAAGAGATATTGGCCTATGGTTTTCTTTTCTTGTGATGTCTTTGGTTCTTT
TATCAGGGTTCTTTTATCAGGGTAGGATGAGCCTCATGTAGTGAATTAGGAAATGTTCTCTGCTCTTCTATATTTTTGAA
ATAATTTATGAAGTTTTGATATTATTTCTTTTTAAACCTTTAGCAGAATTTGCCAGTGAAGCCATCTGGGTAAGGCCTCT
TCTCTGTAGGAAGTCTTTGATTTCCAACTTAATATCTTAACATGTTTTAGGCCTATTCATATTTTCTATGTGTTCTTTAA
TCAATATGGATAGTTTCTGTATTTCTAGGAATTTGTCTATTTCATTTAGATTATCTAATTTGTTGGCATACAGTTGTTCA
TCATTTTTATAATCCTTTTAATTTCCATAAGGTCAGTGTTAATATCCCATCTTTCATTCCCGATTTTTTTTTTCTTGGTG
TATCTAGCTAAACGTTTGCCAATTTTGTTGACATTTTCATATAACTCACTTCTGATTTTTCCATTTTTTTT--CTATTGT
TCTTCTTTCTTTCATTAGTCTTACACCAGTCTTTATACACTTTGACTCATGTTTTCTCTTTTCTTTCTAGGACATGAGTG
GAATCATGAAATGGTGCGTATGGGTGGCCAGGAGTGGTGCTTGTGAGTTATAAAGAAGTGTTTGTAGCTATTAGAGTTAT
TTGGTGGTCAATCAGAACAAAAAAATCTCCCAGAGCAGTAAAATTTGGATGTAACTTTATCTTAAATTGCTGGTCCCAGA
TGAGTATTTGAGTGTTCCATAACTACTGAGAATGGACTTGATCCTATAGTAGTAAATTCAGTGATTGAAGTTCAGAGCTA
CAGCCAGAAAGGATATTAAGGATGAGAGCTTTTACTGTCAGACTTCTGTGACTTCACTTGTTTAATTCATCCTCTGTCCC
TGCATCCAGCCCTGGATCTTTTATTTTATATGTGTTTGTCATATCACATGGAGGGCCTTGTCAAATCCTAAAATAGGGCA
TGGAGACAGCTCCTTTATATTTACTTTGCTTACTTAGAAATAAAGGGTACCAGATCATTATGCAAGGTT-----------
--------------------------------------------------------------------------------
--------------------------------------------------------------------------------
--------------------------------------------------------------------------------
--------------------------------------------------------------------------------
--------------------------------------------------------------------------------
--------------------------------------------------------------------------------
--------------------------------------------------------------------------------
--------------------------------------------------------------------------------
--------------------------------------------------------------------------------
-----------------------------------------------------CTCTTTAGATTTCCAAACGCAGACTTG
AGCCTCAGGATGGTAGCTTTGACTCCGGTGACGATAATTAATCTCTGCCTGTTCACACACTTTAGAAGCTCCTACGGAAA
AGTGTAGTCCTTGTTCCTTATGTTTACCGTTGCCAACCTACTTGGAAACATCAAGTTTCTTACAAACACATAAAATTCTA
AC-ATTTTTACTTAGGTGGTCATAACTTCTCCTTTGCCAAGTGTTCATGTTTCCCAGAGAATCCGAAATCTCAAATATGG
GCCATCCCACTGGAGTTCAGGCTTTGAACTAGGGCACAGGCTCACAGGATTTCCCTACAGAGCCCCACATCACAGTCAGG
ATCTACAGTG----------------CAGAATACTACATCTCTGGCCCCTCCCAGAAGACCCACTGAGATGCAGTGAGTT
TTGCACATATCACTTACCATTTCTACAGGTAGCAAAGTATTTTCCTATGCATTGTTTTATCCAATTTTTTATTATTTCCA
CTAGAGATCAAAGGAGGGTTTAATTATTTTATTTTT--AAGGAAGAAACTGTACTTTCAAGAAATGAAGACCTTCCCAAG
GCCACCCAGAGGATAAGAGGGAAAGTAGACACAGTCACATTTCTTCTGGATCCAGGGTCAGGCTCTCCCTTCTCCCCCTC
CTCAGGCTGAGGGAGAAGGATTCAAGTGCATCAGTGATGTGAAGGAGATGAAACCAGTGATATGGGAGGGATGGACACAG
GATGAAAGATGTGGGGGTCAGACAATTTTTGTCATCCCTAGGAGTGAGATCTGGAGGCTGAAAAAGCCAAAAAAGGTTTC
CAAGAAACTGAAGACTGTATTCCGTGCTCCAGATCTGAGTAGGATGCTGCAAATGTTTAGAGGTGAGGAGAAGCA----A
AGACTGTGGATGTGGGATTGTTGTGGTGTCAGGCAATAAACTGTCTAGGTGGGATAACTTAAAATTGAGGACAGA-GAGA
GGAGGGAGGTCAGAAAAAAAGCAATATTCTGTGATGAAGAGGATGCATTTACATGTAAGGAAAAATGGCTAGGTCTTTAG
TTTATCTTTT-AATTCACTAGCTCACAGCTTCACGGTATTCCCTTCCCCTGTCCCTACTCCAAAGAATATATAGGTATCA
GTGCTTACTCCTTTGTTTCTAATCAGCATCACTGAATCTTTTATTATTTCAGAACTGACAGCTGTCCAATGCTACTGGGG
TAAGAAAAAGTTACCGTCTTTAAATAACTG--TTCCAATTACCTTCCAGAAGTTTATGA-------TTTCAATGATATCT
TCTAATCTTAGCCGCATGCATTCTTAGCACCTCCCAAAACATTTGCCTAATGCATTTCTCCAGTGTTTTACCCC-TCCCA
CAATT-CATCAATGCAAGTTTTTCAGTCACCTCCCAAGTTCCTTTATCACAATGTCACTAGATAAAC-TACTCCAT-ATC
TGTCACCTAGTCATATATATCACATAGATGATTATATTCATATACATATATA-TACACA---------------------
--------------TTTTTTTTTCTTGCAGTGGATGTCACACTGAATTCAGTCAACCTAAATTTGAATCTTGTCCTTTCA
GAAGATCAGAGACAAGTGATGTCTGTGCCAATTTGGCCTTTTCAGTGTTATAATTATGGTGTCTTGGGATCCCAATATTT
CTCCTCTGGGAAACATTACTGGGAAGTGGATGTGTCCAAGAAAACTGCCTGGATCTTGGGAGTATACTGTAGAACATATT
CCCACAATATAAAGTATGTTGTTAGAAGATGTGCAAATCATCAAAATGTTTACTCCAAATACAGACCTTTATTTGGCTAC
TGGGTTATAGGGTTACAGAATAAATGTAAGTATAGCGCCTTTGAGGAGTCTTTATCCTCTGGTCCCGAAGTTTTGACTCT
CTCCATGGCTGTGCCTCCCTGCCGTGTTGGGGTTTTCCTAGACTATGAAGCAGGTATTGTCTCATTTTTCAATGTCACAA
GCCATGGCTCCCTCATTTACAAGTTCTCTAAATGTTGCTTTTCTCAGCCTGTTTATCCATATTTCAATCCTTGGAACTGT
CCAGCTCCCATGACGCTATGCCCACCAAGCTCTTGAATTTTCTCATTTCTTCACCTACAACTCTTTGTCTTGACTTATCT
CCTGCAACTGACTCATCTGCAACATTCAGACCATTGCTTCCTTGTGGTTTCCCTTC-----TTTAGAACTTCTACTCATC
TTTGAGATGTACAGTATATTTGGCTTGAGTTATGAGAGATGCTTATTTATTCATTTACTCTTTTTCATATTTTCAGAGAA
AGTTACCTAATCCCTCCTAAAGACACAGTAGTATTGGTATAACATCTTTGCCTTCCCATTTGTCTGTATTTCGCTTTACC
ACTGATGTGAAGAGGCCCAAAGCCTATTAGCCATCATCCATACTACCTAGGTAGTCCATAGGAACCACCCCCATGACCAC
CACCAACATCAACTAAAGGTTCTTGGAGGGTATGTCAGTGTTTTGCTCAGGATATCCCAGATACATCAAGGAATCAAGGA
GAGGAAAATACGAGCAATATGTGTATTCAGAGTGAAGATTTTATGTCCAGAGTATTTGAGCTCAAACCCTGTCTCTTGTT
TTCTAATCATGATGAATACTTTCTCAGTTTTTT---CCTGAAATATAAATTGGGATTTAAG-------------------
---------------------------------ACTGTACTTAACTATTAAAATCATTGTGTAAAACTAAGTGTCTCTGA
ATGTAATGCACCAATTTAGTGTCTGGAACATAATAAATATTTGCTCTCATGATTACTAAAAA
>Saimiri_bolivensis_TRIM34
ACCCTGGCTTTTCTTCACCTCTTCAACCAGGACCCGAGATTTCTGTTGGCCTGAAGGTGTGTGGGGAGGTTTGT-GGGGG
GTACAGGGTATGCGACTCTAGGAGAAAAGTTCTGAATGAAGTTAGGGGAATTTGATTTGTGGCCCCGAGGCTACCCTGCG
GTGTTGGGAGCAAAGGCTGGCTTGCAAGCTTCCTGCTTTGAGCGCAGGCTGATCTGATCTCTGATCGCAGCCAAGAGTCT
GGGGAGGGACAGCCTTGAAAGGAGTGTTA----GGCAGAAGGCCTCCTTTGTTTTCTGGAGTGAGTTCTTTTTTTTTTTC
CCTCCAGGCTGAATCTGTTTCCATTCCCTTCCTATTCTATAGTCTTGATTTTCTACCTTGCAAAGGAAACTGAATTCTCT
C-CTCTC-TCTTTCTCT--------GTCTTAAAGAGATCAACAACAAAA-CAAAAA---CAAAAAA----------AAAG
AGATGAAC---AGATCTCTTCTTTCCCACCCCTTTCTCT---CTCAAAAGAGAAGGTGGTGAGAGGAGGTCT--GTTTTC
CAAGCCTGTGCAGGTCTGAGCTCCTAGTATGCAGCTTTACATAGAATGGAATCAGAAT---GGCATGACCACGGGAAATA
CTGAAGCGGGTTTTTTCGCTGCCCTCCTGGCAACCACTAAGGCGCTTTCTGTAGCCATCCTCACATATCCTCAGTCCTTG
GCCTGCCAGACAGCAGCAGCTTGAGTTATCTGACTGCTGCACACCACTCTGTTCCCTCTTACCCTGCGTCATTCTGCAGC
CCGTCTCAGGGCTCTCTTTGCACGTCCCTGAACATACCTGCAAGGGTCATTGCTGAGTTTAAAATGAGGAAACAGAGGCC
AGTAGAAGAAAATTAAATGCCAGTTTATTCAGCTCCCTGCGACGTTCCATGCTCTCGCGGAAAGGGGCCAGAGAAGTAGG
GCTCACTTCCTAAGGCCTAGGGTTTATATAGCTATAGCGAGGGAGGAGCAGGGTGCTCTGATTGGTTATGGGGAGCGAGA
TTCAAACGGCGTTTGCCGCCATTGGCTGGCGGGTCGCGGGGGCGACGAGGCAGGGCTAGGTGTGGAGTGCAGAGTCTGGG
GCTGGGTGCAGAGCTAGGTGCTGAGTGCAGAGCCTGGTGCTGAGTGCAGACCCTGGTGCTGAGTGCAGAGGTGGGTGTGT
TGCCACGGTGGGGGAGCTAGGTACTGAGTGCAGAGCCTGGTACCGGGAGCAGAGATGTGACGTTGGTTTGGGGCGCCGAG
AGTGGAGGGTGTGTCCGAGCTCCTGGTGAGGCAAACGGCCTTACAACACCTGC-------TTACTTCAGTAACCCACATG
CCACCAGCGTCTTCACCTGTCTTAGAACTTGCTCCTCATCATTCTTCCTTTTAGACACATTTTTGCATTGATTTGTAACC
TCAGTTTCTTAACTGTTTTTCTTTGCTCAGAACTGCTTAACAGAAGTTGTTTAGTGTGGGCTCAGAAGGCACCCACAGAT
TTAATCTTCTTGTT------------------------------------------------------------------
---------------------------------------------------------------------------AAGAA
TTTGACATA-GAGTATGTCCTATCTTAAGCTCATTTGTAAGCAATTTG----TACCTTGATTGATACGTTGCAGATATTC
TGACACATGCCGTTCTGGCCTCTGCTCTCACCCTTCAGAGTTCACTGTAACTGCCTTTCTGTGTCTCTGCCATACTCCTG
GGTAGAATTCATGTCTGCCTAC----TTCCTGTCTCCCAGATGCATCTAGTCAGGCACAAGGCCCAA-CATATGGGATAA
AACTGATTACAAAGCAGGCTGCTGGTGTGAAAATGTGCAGTTAACATCCATCCACCATTCAATAAATAAATATGAAATAT
ACATGGAGGTCTACATTTTAATTAGAAAGCAATCATAGACCATATCAATAAATGATAGCGTACCCAGGAAGATGACTAAT
ACTATGGAGTAACATCTTTTTTTTTTTTTTTTTTTTTGAGAAGGAGTTTCGCTCTTGTTACCCAGGCTGGAGTGCAATGG
CACGATCTTGGCTCACCGCAACCTCCGCCTCCTGGGTTCAGGCAATTCTCCTGTCTCAGCCTCCTGAGTAGCTGGGACTA
CAGGCACGAGCCACCATGCCCAGCTAATTTTTTGTATTTTTAGTAGAGTCGGGGTTTCACCATGTTGACCAGGTTGGTCT
GGATCTCTTGACCTCGTGATCCACCCACCTCGGCCTCCCAAAGTGCTGGGATTACAGGCTTGAGCCACCGCGCCCGCCGG
AGTAACATCTTT--------------------------------------------------------------------
--------------------------------------------------------------------------------
--------------------------------------------------------------------------------
--------------------------------------------------------------------------------
---AAGAAGTTAAATTAGGGTAAGGACTCTGTATAGACCTCATAAAGTCCTTGCAGCTTTAAATAGTTGGTTTTTGTTTG
TTTGTTTGTTTGTTTGTTTTGAGACGGAGTCTCGCTCTTGTTACCCAGGCTGGAGTGCAATGGCGCGATCTCGGCTCACC
GCAACCTCCGCCTCCTGGGTTCAGGCAATTCTCCTGCCTCAGCCTCCTGAGTAGCTGGGATTACAGGCATGCGATCTCTT
GACCTCGTGATCCACCCACCTCGGCCTCCGAAAGTGCTGGGATTACAGGCTTGAGCCACCGTGCCCGGCCAGCTTTAAAT
AGTTTTTATGAAAGTGTTAAATAGATTTCATTGTAAGGAGACTACATTTGAATAGAATCTTAAGAAT---GTGAAGAAAT
TAAAGGCCTTAG-TGGTTTTTCCG-TGGGCTTAAACAGAGAACAGTGTAGATATGGAAGATTGAGATGGGAGTGTGAAGA
GAGAGGAATAAAAGATGAGCTCTG--------------------------------------------------------
--------------------------------------------------------------------------------
--------------------------------------------------------------------------------
--------------------------------------------------------------------------------
---------------------------------AGGATTGAGGCAGTGGGAAGGGCTGTGTGATGTGGACC---------
-ATTATGAAGTCTGGCCTCACTCTGGATGGCATGGGTTTGAACAGAAGAGTGACATGATGTCAATCATGTCACTTTAAGG
TGATCACTCTGTCTACTGATGTAAGAACAGAGATGGGAGTAGAGTGAAGAAGAGCAATGATGGCCAGGTGCCGTAGCTCA
CGCCTATAATCCCAGCACTTTGGGAGGCTGAGGCAGGTGGATCACCAGAAGT----CGGGACTTTAAGACCAGCCTGGCC
AATATGGTGAAACCCTGTCTCTACTAAAAATACAAAACTTAGCTAAGCATGATGGCATGTAGCTGTAATCCCAGCTACTT
GGGAGGCTGAGGC-AGAAAATCACTTGATTCCAGGAGGCCGAAGTTTCAGTGAGCGGAGATCGTGCCACTACACTCCAAC
CTGGGTAAAAAGAGTGAAACTCCATCTCAAAAAAAAAAAAAGAAGAAGAAGAAGAAGAAGGGCAATGATAGGATCAGCAA
GACTAGTGGGAGAACAATTTCCTGAATTCAGGTGATTTCTGTTGGAGTGGTGAGAGTTGAGGTGGTTGGAA-CTAATTTG
AAAAAAA---------------CTCAGCATATTCTCATGAAGTAACAGACAGAAAAAGATAAGATTACAGGTTGATTAAT
AAAAATGATTCTGTGTTAAAAGATAA--------------CTTTTTGGAAATCTATTGACCAGAATGCGTCAGCTCTTGG
GGAGAGAGTCGTTATTGTAGTACAGATTGAGCCCTGGATTTTAAGGAATAGCTGAAGCAAGAACTCTGTTTATA---GAA
TGGGGAGGAGATGTTGTGATGTTTCTGAGATCTCCCGGCCTCTGAATGTCAAAACAGGCTCTACTTTCCTTATTGGCAGT
TTCTGACTAAGGAACCAGAAGAATTGTCTAGGTTATTGTCTAGAAACTTGAAAAGACATCCTCCCC-TAAAAGTCACTCT
TAGAGACACTCTAATTTTACTATCTAATCTGCAGAGA--CTTA-GAGTCTGCATTATCATATCCAGGTGTTAGGAATC-A
GATTTTAGGAGAAGACTCAAATGAAGGGCGCAGTCGTCTGGCAGCTGTGGTAACCAGGCAACCTGGGAGTTCCGTTAGGC
CGAGGACACTCACGTTCCCTTCTCTACCTCCCTGACGGCTGCTG---GGCTTGGGCCCCAATGAGAAGTGGTGGAGTCAT
TTCTCACATGTGGGACCCTGACTGCTCTGCACTTTTCTCATTGTTTTGCCACTATGGTGGCAACAGCTTTGGCAT--ACA
TGCAGCCTCACTGTGAACATGAAGTCGCAGCC-TTGGTAGAATGCATGTTCTACTACTTCCTCTCCTGGAGCCCCCTGGT
ATTTCTCTCTATTGGTTGGATACGAATTGGAATAAAAGATAACAAAAAAACCCACATCTGTGCTTGGCTCATA-GTTTTA
GCCATAAACAAGGGCAAATCTTAT---ATCATGTAAACTCCTGGAATCGCTAGTCATCAGAGCCTGGTCTGACTTATGGT
CATTGTAGCCAGGGGGCTACCACCATATTGCTTTTGTGTGATTTTTAGTACCTATACTGTTGGCTGGATTACACTCGCCA
GCTAACTTTCAGGCTTTTTTCCTCTTTAAGGTCTTTTGA-----CCTTAGAGGAGTAGACAGGTCTCAAGGCCTAGATTT
ATCTCCATACAGCTTT-CATCATACCCCATCCTTTTGCCAAGCGTGGGGAAGATTCCTGAGTTGTCACACTT-CACAGAT
CTTTCATTCTTTCACTATCAAACCTTTTCAGTTGTATTCGTTTCCTAGCACTGTTGTGACCAATTATCTCCAACTAGATG
ACTTAAAACAACAGGGAT--------------------------TTTTATCACAGCTCAGGGGTCCAGAAGTCCAAAACC
AAGATAGTAGCAAACTTGATTTTTT-----CAGAAGATACTATGTGAGAATCGGTTCAATTCCTCGCACCTAGCTTCTGG
TGGTTTCTAGCCAACTTTGGCA-TCTTTGGCTTATATCTGTGCTGCTCCCATCTCTGCTTCTATTGTCACATGGCTTTCT
TTCCTGTGTGTCTGTATGTCCTCTGCTCTCCTTATAAGAATATAGATC--------------------------------
--------------------------------------------------------------------------------
--------------------------------------------------------------------------------
--------------------------------------------------------------------------------
----------------------------------------ATTAAATTTAGGACCTGTCTTTATCCAGTATCACCTCATC
TTAACTTGAACTTGATTACATCTGCAAGGATGTGATTTACAAATAAGGTCACATTCACATAAGTGAACGTATTTTTGTGG
AGGGTATAATTCGGTCTACTAGAGTAAGTATCAAAATGTTACTATCT----ACTGAGATCGACCCTTTTTCCCTTTGCCT
CATGGTTTCTCGTCTAAACCAACTTCAGGTTCTGAGAACTGGCATTGTACCACCATGCCACCACACTGTGGTATTACCCT
CTGACTGACCACAAGCAATAATTGTAGGTTTGTTTTGCTACTTGGACTCACGCAATTTAACTCCTCAGGGGGAATACAAG
ACAGGAGACACAGCATGCAGGCAGGCAGGGCCGCTTCAGGTGAGCTCTCAGTGAGGAATCTT------------------
--------------------------------------------------------------------------------
--------------------------------------------------------------------------------
--------------------------------------------------------------------------------
--------------------------------------------------------ATGGTGGTACAAGACCAAGTG---
-----GATGTGTGTGAAACTAACATAGCTTAGGTAAACCTTACATCAACAGACTGAGTCCCTTGTAAAGACCATAAGCAT
AGCTTCCAGGGCCCTACAGAGAATGTTTTGTTACAAGATTCTCAACCCTCTTGTGAAAGCTGGGGTCTATGCTTACCAAA
ACAAAACAAAAC----AAATAA-TATAATATAATATACCAGGGGAAGGTGATGGCTATGTCTTTTTTACGGAAAGAAAGT
ACTT-AAGCCTAATGATAACCTTTTT-TCCCC-ACATGTCTAGTCTGGCTTCCAGTCTTATTTCCTCTACCTCACTCTAT
TTCTCACCCTCATCTGCTTTTCTCTGTTTCCTCTGTTAACTCATCCTGCAACCTCCCGTCCCTGCCCTTACCTCCCATTT
GTTGTAAAGAGACTGGCGCTTTTACTTCATTTAGGAAGTGTCACATATCCAGGTTCTTCCAGGTCCATGTGATGCCAAGG
GTTTAGGGCTTTTTGCATCCTAGCCACACATTCAAAAACTTTTGAAGATGGTATGATGATTTGTCCTCCTTGAAT----G
GGGCATTCACTTACATGATTCCTTCTACCTAAAATATTTTTTTTCTTTCTCATTCTGTATTCCTTTCTCATAATTCAGCT
TTCATTTAAACTCTTATTTATCTAAGCAAGATATCTTGGATAGTCCTCTATTTGGCAAATTATCTGATTTTCCAAAAACA
TATACCTCTGTATGATGGTATTTTTT-ACACC-----------------TACCATTTTACACTTTATGAATGATTATATA
ATTAGCTTCTGTCTTCTTTAGGTGATTATTTACTTTATTCTGGCTAATACCATCTGTTCAT-ACTCAACTTTGGATTTTA
ATCCATTTCCTGGATTTTAATCACTGAAGATAATGTGTCTTCAGTGAGAATTTCCTAAATAAACAAATGAATAATTGGTA
TTCAGTTAGTGGATGTGGATTTAACACAGACAGGA---CTTCATTGCTCCAAAATGTGGTCTCCCCTTGTATGTTGGGAT
ATCTCTCCCATGACCAACAGCCATCTCATTTTTTTTTTTATTCCTCAGTGATCTGACATTGATATGAATCTGTGATCTAT
GTGTAACTC--------------------CCAACAAATACACACCTTTGGGTTCCTAT-------TATAACATGCTTTCA
GGCCAAGATAAAATCAACCACACCATCTGCAAACACAAGACCCCCC-AGAAATTCCTAACTTACCTGGTTTCCTCTATTT
CTACACTC--ATCACACTGGATCTCAATCTACTTCTTTCAGGCTTTACCTCTGCTTTTCTTTGTTTAAATAAGTGAAGTA
ACATGGAGACCTCTGAAAGAGAACCCTGAGATTATTATGTTCAATCCAATTCTACCTATTAAATTGAATAATCTATGTAA
GTCATTTAATTTTATTTATTCATCTGAAAGAAAGGGAGTACTCTCACTT---TTTCTTTTTTGAGATGGAGTCTTGCTCT
GTCTCACCCAGGCTGGAGTACAGTGGCGTGATCTCAGCTCATTGCAGCCTCTGGCTCCCGGGTTCAAGCAGTTCTCCTGT
CTCTGCCTCCCGAGTAGCTGGGATTACAGGCGCGTGCCACATCACCCGGCTAATATTGTATTTTTAGTTTCACTATGTTG
GCTAGGCTGGTCTCAAACTCCTGACCTCAGGTGATCCACCCACCTTGGCCTCCCAAAGTGCTGGGATTACAGATGTGAGC
CAGAACACCCTGCCTCTGGAGTACTCTTATTTCTCAAGAATTTTTGGAGGAGGAATGAATAGGCCAAAGTCATTTCTAAA
TTG-AACTGGTAATTAAATCTCCATATTGCAGTCACTGCTGT--CTGTGGGTATCTCTGGGAAGTGTGTGAGTGTATGGC
AGGACTCTGTGTGGGTAGGTGTGTTAGGAGGCGAGCACTTCTTCACTGAAAACCACGTCTGGGATTCCACAGTCCAGCTA
TTGAGGAATTTTCAAATAATGGAATTAAAAAAAAAATGAAACACC-----------------------------------
--------------------------------------------------------------------------------
------------------------GATAAGAAGGTTTT---------------AGTCATCTATGG-AGAGAT-GGGAAAG
TTTTT-----AATATATTTATCAAACATTGTACTTCACTGTGTTCTAAACACTGGAGCTAATGCAATAAAAAAAAAAAAA
AAAAAAAAACCAAAAGTGCCAAATTTATGTGTGGATTGTATTTTAGAAAGAAGAGGTAGACATTTAAAGATAGATGGTGA
TAATA---------------------------------------------------------------------------
--------------------------------------------------------------------------------
--------------------------------------------------------------------------------
---------------------------------------------------------------------------AAAGA
T-GCAAATGTACACTGAATGATGAGTTTGTGGTGGTGCTATAGTT--GTTTATCTTAGCAGACCCTTCTGATAAAGGCAC
ATGTCAGGA-AAAGCTGAAAAAAAAAGTGTAAACGGAAGTCATGCAAATAGCAACAGGAGGATAATTCTAGC------AA
TGAAAAAGTGCAAAAGCCTTGAGGCGTTAATAGCTTGCCCAGATGACTTTCAGACATTTTTGGTTTCTCTTCCTCATCTT
TTTTTGTTTTTCGGTAGTGCAGTCTTGGCCAGTCTTTGATGTGTGTGCACTTATAATGCTTTTTATTTGTACTATTCTTA
TACC-TCCCCTTTCAATCTTCTCAGCCATCCAGGGGTCTTCAAGCAAGAAGAGAGAA-----CCTCAGGAGTTAGAACCA
GA-GAAGCCAGGGAAGCAGTGCAATGGCTTCAAAAATCTTGCTTAACCTGCAAGAGGAGGTGACCTGTCCCATCTGCCTG
AAACTTTTGACAGAACCCTTGAGTCTAGGCTGTGGCCACAGCCTCTGCCAAGCCTGCATCACTGTGAACAACAAGGAGGC
AGTGACCAGCCCGGGAGGAAAAAACAGCTGTCCTGTGTGTGGTATCAGCTACTCATTTGAAAATCTACAGGTTAATCAGC
ATCTGGTCAGCATAGTGGAGAGACTCAGGGAAGTCAAGTTGAGTCAAGACAATGGGAAGAA---AGATCTCTGTGATCGT
CATGGAGAGAAACTTCTACTCTTCTGTAAGGAGGATAGGAAGGTCATTTGCTGGCTTTGTGAACGGTCTCAGGAACACCG
TGGTCACCACACATTCCTCATGGAGGAAGTAGTCAAGGAATGTCAGGTAGGGCCCTAGATGGAGGGACATGGGGCAGAAG
ATGGTAGCTGGTGGAA-GTCTCACCTTTCCATCCTTCTTT----------------------------------------
--------------------------------------------------------------------------------
--------------------------------------------------------------------------------
--------------------------------------------------------------------------------
--------------------------------------------------------------------------------
--------------------------------------------------------------------------------
------ACCCCTTGTGGCACCATAGTCCTGAGTCCCGTGATCTTCTCCATGTACATCTTTCACCCTATGCTCAGCTTCCA
ATGCCTGGGGTACATTTCTGC-TATTCCTTTTATTTACATACCAGATGATCCTGGAGTACAGTCTCTTAGCCAAGAGTGA
GAGACTTTTGTTTT-----TTCCTTTTTCATTATATGAGTGATAAATTCCTTCCCAAAGTTAGCTTTCTTGCTTCTCTAA
GCAGGATAATTTCTGAGGAACATTGTGGATTGAATGAGGAAAGAACATTGATAAGAGGAAAGGACTTTCCTTTTGGCAGG
ATAAATACTTACTCTTAGGAAAGAGAGAATCAGGCTACTCCTCTTGAAGGGGTAGTGACTTTCATCACCAATGAATAAAC
AGTACATTCATCTCTTCAAATTTTCCCACATGTCATAGATTCTAATCACCAGCTTTACAGTTATGATAAATTGCTC-TTT
TCTCATCTCAACTTGATTTCTTTCCTCTTTGTCCTCTATCCAGATACTGAGAAAGCTTATAGCTTGACTCTGATGTGATT
CCTTTCTCATAGGAGAAACTCCATGCAATCCTCAAGAGGCTGAGGAAGGAGGAAGAGGAAGCTGAGAAGCTGGAAGCTGA
CATCAGAGAAAAGAAAACTTCCTGGAAGGCAAGAGGAGATTCTGAAGGATTTCTGAGACAGGAATCTTGACAGGACCTTA
GTCCAAGGAGGCCTCATTCTTTTGGTTCCTTGACATTGCATGAGTCCTGCAGCCATTTGATTAGTTCTCTTCTCTGTCCT
GTCCCTGCTTGGGGTGGAGGCTGGACAGTGGACATGTTACAGTTTACACACACATACCTAGTACTGAGCACCAAGATAGA
CTCTGTGATGAGAAAGGCTAGCAAATAGTACTGAGCACAAAGATAGACTCTGTGATGAGAAAGGCTAGCAAATACTGTGT
TCCATTGCTCTTTTCCAATGAGGCTCTGCTACTTCTGGTGGAAGACACTAGATTAAGGACTAAGGTTTTCCTCAAGATTC
AAATTAGGAGTATGGTAAGGGAGGCAGTCATGAATATCCAGGAAAGCTGTCTAGAAGCTAAGACTTACTATGTTTTACAT
TTTGTCTCAGCGTTGGCCTAGATAAGACAGTTTGAGATCATTGCTTTGGTAGGTACTAAAAA-AAAATAGTAGGAAAAAA
CAGCTTCCCCC-AAATACTACTATTG------------------------------------------------------
--------------------------------------------------------------------------------
--------------------------------------------------------------------------------
--------------------------------------------------------------------------------
-----------CTTCCTTTCACTACCTTGCTGGTTTGAAC----------------------------------------
--------------------------------------------------------------------------------
---------------------TCCCTACTGGCTTCTCATCCCTTACACAGTAGGCCCTCAGCCCGACAAACTTATTACAT
CTCTCTCTTGTCCATCCTTGCAGTATCAGATACAAACTGAGAAACAAAGGATACAAACAGAATTTGATCAGCTTAGAAGA
ATCCTAGATAGTGAGGAGCAGAGAGAGCTGAAAAGATTGGAAGACGAGGAAAAGAAGACGCTGGATAACTTGGCAGAGGC
TGAAGACGATCTAGTTCAGCAGAAGCAGTTGGTGAGAGAGCTCATCTCAGATGTGGAGTGTCGGAGTCAGTGGTCAACAG
TGGAGCTGCTGCAGGTAAGAAGGATCGCTCAATCTGAGATTCTGGAAACACAGTTTGTTACCTTTTTTTCTGTGTCCTGG
GGTTCTCATTCTGGTGGTGACACTAAGGGGTTTCTTTGGCCTTGCAGTGCCCATTTATCATCCATTCTAGATGTCGTGGA
TATGAATGAATATAGGCATTCTAGGGCAATGTTACATTATTGTTAATTTATGAAGTAAAGGAATACACTTAACCTTGCAG
AGAAGAGCCATAATATCTAGTTATAGTCACTAGGCCCCTGTTATATGTGATCTAGTGTCAGGCTTTTGTCAGACTTCTAT
TTACTCAGATTAGTCACAGGTAAACACATGATGCATTTTCAGGTTTAAGAGCAAACACAT--AAGAAATGTGTTCTATTT
AAGTTTAAAATATACTTATTTGTT--------------------------------------------------------
--------------------------------------------------------------------------------
--------------------------------------------------------------------------------
--------------------------------------------------------------------------------
---------------------------ATTGCAGATGTT-----------------------------------------
--------------------------------------------------------------------------------
--------------------------------------------------------------------------------
--------------------------------------------------------------------------------
------------------------------------CCCTGTTAATTCTTTTTAAATGTGAAGTGATGGGATATTGAGCC
TTTTGGCGAGAGAGATGGACAAATATCTGGACAGACAGTGCTTCCCTTTCTTTGATAAATTTCTAAATATTTCCTTTTTA
AGTTTTGGAATGAAGGAGGAGAGTAACTGATTTTCATTTGTTGAATTGTTTCCTTTGTCTCCGGTGCTTATATTCCAGAT
TTCTTTT-CTTCCTTTTTCCTTTTGTCTTCTTCTTTTTGTTTAAATTTAAGATTACTCTGGAACAGAGGTTCCTAAACAT
ATTTTGCACTCATTAGGATGGCTATAATCAAAAAA-GATGGACAATACCAAGTATTGGGGAAGATATGAAGAAATTGAAA
TCTTCTTGAATTGCTAGTATAGATGTAAAATATAGTAAAGCTACTTAG-AAAAACTGCTTGGCAGTTGCTCAGAAACTTA
AAGGGAATTCTCA-TGTGGCCTAGCCAT-CCATTCCTACATACATACCTAGAAGAACTGAATACATATATCTCTGCGTAA
ACTTATATATGAAAGTTCACAGCAGTATTGTTCAAAAATAAAAACAACTCAAATCTCCTTAA-CTAAGGAATGGATAAGG
AAAATGTGTTATATTCAAACAATGTAATATTGTTTAGCTATGAAAAATAATGAAGTAATAATACATGCT--GACATGAAT
GCACCTTGAAAACATTAT---AACTGAAAGAAGACAGACACAAAGTTCTTTTT-GTATGATTCCATTTATATGAA-----
-----AGTCTATACGTAGCAAATCCATAATACAGAAATTAGATTAGTGGTTGTCAGGGCTCTGGGGAAGAATAAATAGGA
AGTAATTGCTAATTAGTGCACAATTTCTATTTATAGTGATGAAAATGATCTGGAGTTTTCTATGCAATGATGGTTACACA
ATATTGTGATTATATTAAAACCTGTTA-----------------------------------------------------
--------------------------------------------------------------------------------
--------------------------------------------------------------------------------
--------------------------------------------------------------------------------
------AATTATGTACTATAAAATGCAAATTTT-GTGGTATTCGAACTACATTTCAGTAAAAACAAAAGCAAAAAGATTC
TGTAGGCCCTTTTTTATAGTTCTTCCCTAAGCTCTTCAGAACCCTTTGAAGCGCCACCTTCACAAAAGAACACTGTGTTT
ATGTCGTTTGTCTAGGCATTTGTCCTATTTAAGTCAGTCTTAGTTGCTATTTTGGTCACTTGGAACTTAAAAAAATATTG
AAATATCAAAAATTATAAATGCTGTAGGTTTAACATTTCACATCTAGATGTTAACTTCAAAGAATGGCAAATGGA-----
--------------------------------------------------------------------------------
--------------------------------------------------------------------------------
--------------------------------------------------------------------------------
--------------------------------------------------------------------------------
--------------------------------------------------------------------------------
--------------------------------------------------------------------------------
--------------------------------------------------------------------------------
--------------------------------------------------------------------------------
--------------------------------------------------------------------------------
--------------------------------------------------------------------------------
--------------------------------------------------------------------------------
--------------------------------------------------------------------------------
--------------------------------------------------------------------------------
--------------------------------------------------------------------------------
--------------------------------------------------------------------------------
--------------------------------------------------------------------------------
--------------------------------------------------------------------------------
--------------------------------------------------------------------------------
--------------------------------------------------------------------------------
--------------------------------------------------------------------------------
--------------------------------------------------------------------------------
--------------------------------------------------------------------------------
--------------------------------------------------------------------------------
--------------------------------------------------------------------------------
--------------------------------------------------------------------------------
--------------------------------------------------------------------------------
--------------------------------------------------------------------------------
--------------------------------------------------------------------------------
--------------------------------------------------------------------------------
--------------------------------------------------------------------------------
--------------------------------------------------------------------------------
--------------------------------------------------------------------------------
--------------------------------------------------------------------------------
--------------------------------------------------------------------------------
--------------------------------------------------------------------------------
--------------------------------------------------------------------------------
--------------------------------------------------------------------------------
--------------------------------------------------------------------------------
--------------------------------------------------------------------------------
--------------------------------------------------------------------------------
--------------------------------------------------------------------------------
--------------------------------------------------------------------------------
--------------------------------------------------------------------------------
--------------------------------------------------------------------------------
--------------------------------------------------------------------------------
--------------------------------------------------------------------------------
--------------------------------------------------------------------------------
--------------------------------------------------------------------------------
--------------------------------------------------------------------------------
--------------------------------------------------------------------------------
--------------------------------------------------------------------------------
--------------------------------------------------------------------------------
--------------------------------------------------------------------------------
--------------------------------------------------------------------------------
--------------------------------------------------------------------------------
--------------------------------------------------------------------------------
--------------------------------------------------------------------------------
--------------------------------------------------------------------------------
--------------------------------------------------------------------------------
--------------------------------------------------------------------------------
--------------------------------------------------------------------------------
---------------------------------------------------------TTTTTTTTTAATGTTGAACCAAC
CTGGCATTTCTGGGATATGTTCTACTTGGGCCTTAGTTATAATCTTTTTGCTGGATTGCTGGATTTGATTTTCTTGTATT
TTTGTTGGAGAATTTTGTATTTATATTCATAAGAGATAGTGGCCTATGTTTTTCTTTTCTTGTGATGTCTTTAGTTCTTT
TATTAGGGTTATTTTATCAGGGTAGAATAAGTCTTATGTAATGAATTAGGTAGTGTTTCCTGCTCTTCTATATTTTTGAA
ATAGTTTATGAAGTTTTGATATTACTTCTTTCTAAACCTTTAGCAGAATTCACCAGTGAAGCCATCTGGGTAAGGTCTTT
TCTCTGTAGGAAGTCTTTGATTTCCAATTTAATCTCTTAACATGTTTTAGGCCTATTCATATTTTCTATGTTTTCTTTAA
TCAGTATTGATAGTTTCTATATTTCTAGGAATTTGTTTATTTCATTTAGATTATCTAATTTGTTAGCATATAGTTGTTCA
TCATTTTTATAATCCTTTTAATTTCTGTGAGGTCAATGGTAATATCTCATCTTTCATTCCTGATTTCTTTTT-CTTGGTA
TGTCTAGGTAAATTTTTGCCAATTTTGTTGACACTTTTGTATAACTTACTTCTGATTTTTCCATTTTTTT---CTATTGT
TCTTCTTTCTTTCATTTGTCTTATGCTAGTCTTTACACACTTTGACTCATGTTTTCTCTTTTCTTTCTAGGACATGAGTG
GAATCGTGAAATGGTGAGTATGGGTGGTCAAGAGTGGTGCTTGTGAGTTATAAAGAAGTGTTTGTAAATATTAG------
---GTAGTCAATCAGAAGAAAGAAATCTTCCAGAGTAGTAAAATTTGGATGTAGTATTACCTTAAATTACTGGTTCCAGA
TGAAAATTTGAGTTTTCCATAAGTATTAAGAATAGATTCAATCCTATAGTAGTAAATTCAGTGGTTGAAGTTGAGAGCTA
GAGCCAGAAAGGATATTAAGGATGAGAGCTTTTACTGTCAGACTCTTGTGACTTGACTCGTTTCATTCATCCTCTGTCC-
TGTATCCAGCCCTGGATTTTTTGTTTTATATATGTTTGTCATATCACATGGAGCACCTTGTCAAATCCTAAAATAGGGCA
TGGAGATAGCTCCTTTATATTTACTTTGCTTACTCAGGAAAAGAAGGTACCATATCATTATGCAAGGTTTTCTTTTTTTC
TTTCTTTTTTTTTTTTTTGAGACGGAGTTTCGCTCTTGTTGCCCAGGCTGGAGTGCAATGGCGCATTCTCGGCTCACCGC
AACCTCTGCCTCCTGGGTTCAAGCAATTCTCCTGTCTCAGTCTCCCAAGTAGCTGGTATTACAGGCATGTGCCACCACGT
CCGGCTAATTTTTTTGGTTTTTTTTTTTTTTTTTTTTTTTTGAGACGGAGTTTCGCTCTTGTTACCCAGGCTGGAGTGCA
ATGGCGCGATCTCGGCTCACCGCAACCTCCGCCTCCTGGGTTCAGGCAATTCTCCTGCCTCAGCCTCCTGAGTAGCTGGG
ATTACAGGCACGCGCCACCATGCCCAGCTAATTTTTTGTATTTTTTTTTTAGTAGAGACGGGGTTTCACCTTGTTTACCA
GGATGGTCTCGATCTCTCGACCTCGTGATCCACCCGCCTCGGCCTCCCAAAGTGCTGGGATTACAGGCTTGAGCCACCAC
GCCCGGCCTTTTTTTGTATTTTTAGTAGAGATGGGGTTTCACCATGTTGACCAGGATGGTCTCGATCTCTTGACCTTGTG
ATCCACCCTCCTCGGCCTCCCAAAGTGCTGGGATTACAGGCGTGAGCCACCATGTCCGGCCCTAAGGTTTTCTTTTTTTT
TTTTTTTAAGATGGGGTTTCACCATGATGGCCAGGCTGGTCTTGAACTCCTGACCTCAGGTGATCCACCCACCTCAGCCT
CCCAAAGTGTTAGGATTACCGGCGTGAGCCACTGTGCCCGGCCTCACAAGGTTTTCTTTAGATTTTGAAAAACAGACTCG
AGCCTCAGGATGGTGACTTTGACTCTGGTGACAATAATTGATCTCCACCTGTTTACACACTTTAGAAGCTCCTATGGAAA
AATTTAGT-------CCTTGTGTCTAAAGTTGCCAACCCACTTGAAAACATCAAGTTTCTTACAAACACATAAAATTCTA
GGCATCTTTAGTTAGGTAATCATAACTTCTCCTTTGCCAAGTGTTTCTGTGTCCTAGAGAATCTGAAATCTCAAATGTGT
-CCATACCACTGGAGTTCAGGCTTTGAACTAGGGCACAGGCTCACAGGCTTTCCCTGCAGAACCCCATATCACAGTCAGG
ATCTGCAGCGTCACTCTTGATTTGCCCAGAAACCCACATCTCCGGCCCCTGCCAGAAGATCCACTGAGATGCAGTGAGTT
TTCCGCATATCACATACCGTTTCTAAAGGTAGCAAAGTCTTTTCCTATGCATTATTTTATCCAATTTTTTACTGTTTCCA
TTAGACATCAAAGGAGCATTTAATTATTTCATTTTTTTAAGTAAGAAACTG--CTTTCAAGAAATGAAGACCTTCTTAAG
GTCACCCAGAGGATAAGAGAGAGAGTAGGCACAAACATGTTTCTTCTAGCTCCAGGGTCAGGCTCTTTCTTCTG-TCCTC
CTCAGACTCAGGAAGGAGGGTTCAAGTGCATCAGTGATGTGAAGTAGATGAAACCAGTGGTGTGGGAGTGATGGACACAG
GTTGAGAGATGTGGGGGTTAAAAAATTTTTGTCATCCCTAGGAGTGACATCTGGAGGCTGAGAAAGCCAAAAACTCTTTC
CCAGAAACTGAAGACTGTATTCCATGCTCCAGATCTGAGTAGGATGCTGCAAATGTTTAGAGGTGAGGAGAAGCAGATAA
AGACCGTGGATGTGGGATTGTTGTGGTGTCAGGTAATAAACTGTCTAGGTGGGATGACTTAAAATTGAGGACAGAAGAGA
TGAGGGAGGTCAGAGAATAAGGAATATTCTGTGATAAAGAGGATGTGTTTATATGTAAAAGAAAATGGCTAGGTCTCTGG
TTTATCTTTT-AATTCACTAGCTCAAAGCTTCACGGTATTCCCTTCCCCTGTCCCTACTTTAAACAATAGGTAGGTATCA
GTGCTTACTCTTTTGTTTCTAATCAGCATCACCGAATCTTTTATTATTTCAGAACTGACAGCTGTCCGATGCTACTGGGG
TAAGAAAACATTCCAGTCTTTAAATAACTGTGTTCCAGTTACCTTTCAGAAGTTTGTGGTTTGTGGTTTCAGTGATATCC
TCTAATCTTAGCCTCATTCACTCTCAGCGCCTCCCAAAATATTTGCATAATACGTTTCTCCAGTGTTTTACTCC-TCCCA
TAATT-CATCAATGCACGTTTTTCAGTCAATTCCCAAGTTCCTTCAT-----------AGGATAAACTTACTCCAT-ATC
TGTCATCTAATCATATATATCACATAGATTATTATATTCATATACGTATATAATACACACATATATATATATATATATAT
A--------TTTTTTTTTTTTTTCTTGCAGTGGATGTCACAATGAATCCAGTCAACCTGAATTTGAATCTTGTCCTTTCA
GAAGATCAGAGACAAGTGATATCTGTGCCAATTTGGCCTTTTAAGTGTGATAATTTTGGTATCTTGGGATCCCAATATTT
CTCCTCAGGGAAACATTACTGGGAAGTGGATGTGTCCAAGAAAACTGCCTGGATCCTGGGGGTATATTGTAGAACACGTT
CCCGCAATATAAAGTATGTCATTAGAAGACGTGCAAATCATCAAAATGTTTACTTCAAATATAGGCCTCTATTTGGCTAC
TGGGTTATAGGGTTAGAGAATAAATGTAAGTATAGGGCCTTTGAGCAGTCTTTGTCCTCTGATTCTGAGGTTTTGACTCT
CTCCATGGCTGTGCCTCCCTGCCGTGTTGGGGTTTTCCTAGACTATGATGCAGGTATTGTCTCCTTTTTCAATGTCACAA
GCCATGGCTCCCTCATTTATGAGTTCTCTAAATGTTGCTTTTCTCAGCCTGTATATCCATATTTCAATCCTTGGAAGTGT
CCAGCTCCCATGACTCTGTGCCCACCAAGCTCTTGAATTTTCTCATTTCTTCACCTACAACCCTCTGTCTTGACTCATCT
CCTGTATCTGACTTATCTGTAACATTCAGACCATTGCTTCCTTGTGGTCTCCCTTCCTTACTTTAGAACTTTCACTCATC
CTTGAGATGTACAGTATATTTGGCTTGAGTTATGAGAGATGCTTATTTATTCATTGACTCTTTTTCATATTTTCAGAGAA
AGTTACCTAATCCCTCTTAAAGGCACAGCAGTATTGATATAATATCCTTGCCTTCTCATTTCTCTGTGTTTTGCTTTATC
ACTGATGTGAAGAGGCCCAGAGCCTGTTAGCCACCATACATGCTACCTAGGTGGTTCATAGGAACCACCCC-ATGACGAC
CACCAGCATCAACTGAAGGTTCTTGCAGAGTATGTCAGTGTGTTGCTCAGGATATCCCAGGTACATCAAGGAATCA-GTA
GAGAAAAATCTAATCAATATGTGTATTCAGAGAGA-TTTTTTATGTCCAGAGTATTTGAGCTCAAACCCCATCTCTTGTT
TTCTAATCATGTTGAATACTTTCTCATTTTTTT--ATCTGAAATACAAATTGTGATTTAAGCCTGCACCTGACATTTTGG
GCTGGATGAAAAAAGAAAGAAAAGAAAAAAAAGACTGAACCTAACTATTAAGATCATTGTGTAAAACTAGATGTCTCTAA
ATGTAATGCACCAATTTAGTGTCTGGAACATAATAAATATTTGCTCTCATGATTACTAAAAA
>Callicebus_moloch_TRIM34
ACCCTGGCTTTTCTTCACCTCTTCAACCAGGACCCGAGATTTCTGTTGGCCTGAAGGTGTGTGGGGTGGTTTGT-GGGGG
GTAGAGGGTATGAGACTCCAGGAGAAAAGTTCTGAATGAAGTTAGGGGAATTTGATCTATGGCCCCGAGGCTACCCTGCA
GTGTTGGTAGCAAAGGCTAGCTTGCAAGCTTCCTGCTTTGAGTGCACACGGATCTGATCTCTGATCGCAGCCTAGAGTCT
GGGGAGGGACAGCCTTGAAAGGAGTGTTAAAGAGGCAGAAGGCCTCCTTTGTTTTCTGGAGTGACTTGTTTTTTTT----
-CTCCAGGCTGAATCTGTTTCCATTCCTTTCCTATTCTATAGTCTTGATTTTCTACCTTGCAAAGGAAACTGAATTCTCT
CTCT-------TTCTCT--------CTCTTAAAGAGATGAACAACAACAACAAAAAAAACAAAAACAAAAACAAAAAAAG
AGATGAACAGAAGATCTCTTCTTTTCCACCCCTTTCTCTCTTCTCAAAAGAGAAGGTGGTGAGAGGAGATCT--GTTTTC
CA-GCGTGTGCAGGCCTGAGCTCCTAGTATGCGGCTTTACATAGAATGGAGCCAG--T-GGGGCATGACCAGGGGGAATA
TTGAAGCGAGTTCTTTCACTGCCCTCCTGGCAACCACTAAGGCGCTTTCTGCAGCCATCCTCACATAT-CTTAGTCCTTG
-----CCAGACAACAGCAGCTTGAGTGATCTGACTGCTGCACAGCGCTCTGTTCCCTCTTACCCTGTGTCATTCTGCAGC
CCGTCTCAGGGCTCTCCTTGCACGTCCCCGAACATACCTG----------------------------------------
--------------------------------------------------------------------------------
--------------------------------------------------------------------------------
--------------------------------------------------------------------------------
--------------------------------------------------------------------------------
--------------------------------------------------------------------------------
-----------------------------------------------------TTTACTTTTACTTCAGCAACCCACAAG
CCACCAGCGTCTTCACCTGTCTTAGAACTTGTTCCTCGTCATTCTCCCTCTTAGACACACCTTTGCATTGATTTGTAACC
TCAATTTCTCA-TTGTTTTTCTTTGCTCAGAACTACTTAACAGAAGTTGTTTATTGTGGGCTCAGAAGGCACTCACAGAT
TTAATCTTGTT---------------------------------------------------------------------
---------------------------------------------------------------------------AAGAA
TTTGACATA-GAGTATGTCCTATCTTAAGCTCACTTGTGAGCAATTTGTGAATACCTTGATTGATATGTTACAGATATTC
TGACATATGCCATTCTGGCCTCTGCTCTCACCGTTCAGAGTTCACCGTAACTGCCTTTCTGTGTCTCTGCCTTACTCCTG
GGTAGAATCCATGTCTGCCTACATGCTGACTGTCTCCCAGATGCATCTAGTCAGGCACAGGGCCCAA-CATATGGGATAA
AATTGATTATAAAGCAGGCTGCTGGTGTGAAAATGTGCAATTAGCATCCGTTCAACATTCAATAAATAAATATGAAATAT
ACATGGAGGTCTACATTTCAATTAGAAAGCAATCATAGACCATATCAATAAATGATAGCGTACACAGGAAGATGACTAAT
ACTATGGAGTAACATCTTT-------------------------------------------------------------
--------------------------------------------------------------------------------
--------------------------------------------------------------------------------
--------------------------------------------------------------------------------
--------------------------------------------------------------------------------
--------------------------------------------------------------------------------
--------------------------------------------------------------------------------
--------------------------------------------------------------------------------
---AAGAAGTTAAATTAGGGTAAGGACTCTGTAAAGACCTCATAAAGTCCTTG---------------------------
--------------------------------------------------------------------------------
--------------------------------------------------------------------------------
---------------------------------------------------------------------GAACTTTAAAT
AGTTTTTATGAAAGTTTTGAATAGATTTCATTGTAAGAAGAATACATTTGAATATAATCTTAAGAAT---GTGAGGAAAT
TAAAG-CTTTAG-TGGTTTTTCCC-TGGGCTTAAACAGAGAACGATGTGGGTATGGAAGATTGAGATGGGAGTGTACAGA
GAGAGAAATAAAAGATGAGCTCTG--------------------------------------------------------
--------------------------------------------------------------------------------
--------------------------------------------------------------------------------
--------------------------------------------------------------------------------
---------------------------------AGGATTGAGGCAGTGGGAAGGGCTGTGTGATGTGGACCTAACTGGAC
CATTATGAAGTCTGGCCTCGCTCTGGATGGCATGGGTTTGAACAGAAGAGTGACATGAT---TGACATCT-GCTTTAAGT
TGATCACTCTGTCTACTGATGTAAGAACAGAGATGAGAGCAGAGTGAAGAAGAACAATGATGGCCGGGTGCAGTAGCTCA
CGCCTATAATCCCAGCACTTTGGGAGGCTGAAGTGGGTGGATCACCAGAAGT----CAGGACTTTAAGGCCAGCCTGGCC
AACATGGTGAAACCCCGTCTCTACTAAAAATACAAAACTTAGCTGGGCACGATGGCATGTACCTGTAATCTCAGCTATTT
GGGAGGCTGAGGC-AGAAAATCACTTGAATCCAGGAGGCCGAAGTTTCAGTGAGCCAAGATCGTGCCACTATCCTCCAAC
CTGGGTAACAAGAGTGAAACTCCATCTCAAAAAAAAAAAAAAA----GAAGAAAAAGAAGGGCAATGATAGTATCAGCAA
GACTAGTGGGAGAACAATTTCCTGAATTCAAGTGATTTCTATTGGAGTGGTGAGAGTTGAGGTGGTTGGAA-CTAATTTG
AAAAAA----------------CTCAGCATATTCTCATGAAGTAACAGATAGAAAAAGACAAAATTACCGGTTGATTAAT
AAAAATGATTTTGCATTAACAAATAA--------------CTTTATGGAAATCAATTGACCAGAATACGTCAGCTCTTCG
GGAGAGGGTCATTATTGTGGTATAGATTGAGCCCTGGACTCTAAGGAATAGCTGAAGCAAGAACTCTGTGCACAGAGTAA
TGGGAAGGAGATGTTGCGATGTTTCTAAGATCTCCCGGCCTCTGACTGTCAAAACAGGCTCTACTTTCCTTATTGGCATT
TTCTGACTCAGGAACAATAAGAATTGTCCAGGATATTGTCTAGAAACTTGAGAAGACATCCTCCCC-TAAAAGTCACTCT
TAGAGACACTCTAATTTTACTATCTAATATGCAGAGAGACTTA-GAGTTTGCATTATCATATCCAGGTGTTAGGAATCCA
GATTTTAGGAGAAGACTCAAATGAAGGGTGCAGTCATGTAGCAGCTATGGTAACCAGACAACCTGGGAATTCTGTCAGGC
CAAAGGCACTCATGTTCCCTTCTCTACCTCCCTGGCGGCTGCTG---GGCTTGGGCCACATTGAGAAGTGGTGGAGTCAT
TTCTCACATGTGGGACCCTGGCTGCTCTGCAGTTTTCTCATTCTTTTGCCATTCTGGTGGCAGCAGCTTTGGCATCAACA
TGCAGCCTCACTGTGAACATGAAGTTACAGCC-ACGGCAGAATGCATGTTCTACTACTTCCTCTCCTGGAGCCCCCTGGT
ATTTCTCACTATTGGTTGGATACTGATTGAAATAGAAGACAACAAAGAACCCCGCATCTGTGGTTGGCTCACA-GTTTAA
GCCATAAACAAGAGTGAACATTATCATATCATGTAAACTCCTGGTCTTGCTAGTCATCAGAGCCTGGTCTGACTCATGGT
CATTGTAGCCAGGGG-CTACCACCAT---GCTTTTGTGTGATTTTTAGTATCTATACTGTTGGCTGGATTACACTCGCCA
GCTAACTTTCAGCCTTTTTTCCTCCTTAAGGTCTTTTGATGGATGGTTAGAGGAGTGGACAGGTCTCAAGGCCTAGATTT
ATCTC-ATACAGCTTT-CATGGTACCCCATCCTTTTGCCAAGCGTGAGGAGGATTCCTAGGTTGCCACACTT-CACAGAT
TTTTCTTTC----ACTATCAAACCTTTTCAATTGTATTCGTTTCCTAGCACTGTTTTGACCAATTATCACCAACTAGATA
ACTTAAAACAGTAGGGAT--------------------------TTATATCACAGCTGAGGAGTCCAGAAATCCAAAACC
AAGATAGTGGCAAACTTGATTTTTT-----CAGAAAACTCTATGTGAGAATCAGTTCAATTCCTCGCTCCTAGCTTCTGG
TAGTTTCTAGCCAACTTTGGCATTATTTGGCTTTTATCTGTGCTGCTCCCATCGCTGCCTTTATTGTCACATGACTTTCT
TTCCTGTGTGTCTGTATGTCCTCTCCTCTTCTTATAAGAACACAGATC--------------------------------
--------------------------------------------------------------------------------
--------------------------------------------------------------------------------
--------------------------------------------------------------------------------
----------------------------------------ATTAAATTTAGGGCCTGTCTTTATCCAGTATGAACTCATC
TTAATTTGA------TTACAACTGCAAGGATGTGATTTACAAATAAGGTCACATTCACATAAGTGAACGTATTTTTGTGG
AGGGTATAATTCGGTCTATTAGAGCAAGTATCAGAATGTTACTATCT----ACTGAGATCTACCCTTTTTCCCTTTGCCT
CACGGTTTCTTGTCTAAACCAACTTCAGGTTCTGAGAATTGGCATTGTATCACCATGCCGCCACTCTGTGGTAT-ACCCT
CTGACTGATCACAAGCAATACTTGTAGGTTTGTTTTGCTATTTGGACTCATGCAATTTAACTCCGCAGGGGGAATACAGG
AGAGGAGACACAGCATGCAGGCAGGCAGGGCCGCTTCAGGTGAGCTCTCAGTGAGGATTCTT------------------
--------------------------------------------------------------------------------
--------------------------------------------------------------------------------
--------------------------------------------------------------------------------
--------------------------------------------------------ATGGTGGTACAAGACCAAGTG---
-----GACGTGTGTGAAACTAACATAGCTTAGGTAAACCTTACATCAACAGACTGATTCCCTTGTAAAGACCATGAGCAT
AGCTTCCAGGGCGCCACAAAGAATGTTTTGTTACAAGACTCTCAACCCTCTTGTGGAAGCTGGGGTCTATGCTTACCAAA
ACAAAACAAAAC----TTATAAA-ATAAAATAATATACCAGGGGAAGGTGATGGCTATGTCTTTTTTACAGAAAGAATGG
ACTT-AAGCCTAATGATAACCTTTTT-CCCCCCACATGTCTAGTCTGGCTTCCAGTCTTATTTCCTCTACCTCACTCAAT
TTCTCACCCTCGCCTGCTTTTCTCTATTTCTTCTGTTAACTCGTCCTGCATCCTTCCATCCCTGCCCTCACCTCCTATTC
GTTGGAAAGAGACTGGCGCTTTTACTTCATTTAGGAAGTGTCACACATCCAGATTCCTTGAGGCTCATGTGATGCCAAGG
GCTTAGGGCTTTTTGCATACCAGCCACACATTCAAAAACTTTTGAAGATGGTATGATGGTTTGTCCTCCATGAAT----G
GGGCATTCACTTACACGATTCCTTCTACCTAAAATATTTTTTT-CTTTCTCATTCTGTGTTCCTTTCTCATAATTCAGCT
TTCATTTAAACTCTTATTTATCCAAGCAAGATATCTTGGCTAATCCTTGATTTGGCAAATTATTTGATTTTCCAAAAACC
TATACCTCTATATGATGGTGTTTTA--ACACC-----------------TGCCATTTTACACTTTATGAATAATTATATA
ATTAGCTTCTGTCTTCTTTATGTGATTATTTACTTTATTCTGGCTAATACCATCTGTTCAT-ACTCAACTTTGGATTTTA
ATCCATTTCCTGGATTTTAATCACTGAAGATAATGTGTCTTCAGTGAGAATTTCCTAAATAAACAAATGAATAATTGGCG
TTCAATTAGTGGATGTGGATTTAACACAGACAGGAGGACTTCATTGTTCCAAAATGTGACCTCCCCTTATATGTTGGGAT
ATCTCTCCCATAACCAACAGCCATTTCATTTGTATTTCTATTCCTCAGTGATCTGACATTGGTATGAATCTGTGATCTAT
GTGTAACTCAGCTGGTTACATTCCCTCCCCCAACAACTACACACCTTTGGGTTCCTAT-------TATAACATGCTTTCA
GGCCAAGATAAAATCAATCACATGATCTGCAAACACAAGACCCCCT-AGAAATGCCCAACTTACCTGGTTTCCTTGATTT
CTACACTCTTATAACACTGGATCTCAATCTACTTCTTTCAGGCTTTACCTCTGCTTTTCTTTGTTTAAATAAGTGGAGTC
GCATGGAGACCTCTGAAAGAGAACCCTGAGATTATTATGTTCAATTCAATTCTGCCTATTAAATTGAATGCTCTTTGTAA
GTCATTTAATTTTATTTATTCATCTGAA-GAAAGGGAGTACTCTTACTTCTTTTTCTTTTTTGAGATGGAGTCTTGCTCT
GTCTTGCCCAGGCTGGAGTACGGTGGCGTGATCTCAGCTCACTGAAGCCTCTGGCTCCCGAGTTCAAACGATTCTCCCAT
CTCTGCCTCCAGAGTAGCTGGGATTACAGGCGTGCACCACATCACCCAGCTAATACTGTATTTTTAGTTTCACCATATTG
GCTAGGCTGGTCTCAAACTCCTGACCTCAGGTGATCCACCCACCTTGGCCTCCCAAAGTGCTGGGATTACAGATGTGAGC
CAGAACACCCTACCTCTGGAGTACTCTTATTTCTCAAGAATTTTTGGAGGAGGAACAAATAGGCCAAAGTCATTTCTAAA
TTG-AACTGGTAATTAAATCTCCGTATTGCAGTCATTGCTGTTTCTGTGGGTATCTCTGGGAAGTGTGTGAGCATATGGG
AGGACTCTGTGTGGGTAGGTGTGTTAGGAGGTGAGCACTTCTTCACTG-AAACCATATCTGGGATTCCACAGTCCCGCTA
TTGAGGAATTTTTAAATAATGAAAT-AA-A-AAAAATGAAACACG-----------------------------------
--------------------------------------------------------------------------------
------------------------GATAAGAAGGTTTT---------------AGTCATCTATGG-AGAGAT-GGGAAAG
TTTTT-----AATATATTTATTAAACATTGTACTTCACTGTGTTCTAAACACTGGAGCTATAGCAGTGAA-------AAA
AACAAAAAAACGAAAGTGCCAAATTTATGTGGGGATTGTATTTTAGAAAGAAGAGGTAGACATTTAAAGATAGATGGTGA
TAATA---------------------------------------------------------------------------
--------------------------------------------------------------------------------
--------------------------------------------------------------------------------
---------------------------------------------------------------------------AAAGA
T-GCAAATGTACACTGAGTGATGAGTTTGTGGTGGTGCTATAGTT--GTTTGTCTTAGCAGACCCTTCTGATAAAGGGAC
ATGTCAGGA-AAAGTTGAAAAACAA-GTGTAAACGGAAGTCATGCAAATAGCAATAGGAGGATAATTCTAGC------AA
TGAACACCTGCAAAAGCCTTGAGGCGTTAACGGCTTGCCCAGACCACTTTCAGACATTTTTGGTTTCTCTTCCTCATCCT
TTTT-GTTTTTCGGTATTGCAGTCTTGGCCAGTCTTCGATGTGTGTGCACTTATAATGCTTTTTATTTGTACTTTTCTTA
TGCCATCTCCTTTCAATCTTCTCAGCCATCCAGGGGTCTTCAAGCAAGAAGAGAGAA-----TCTCAGGAGTTAGAACCA
GAAGAAGCCAGGGAAGCAGTGCAATGGCTTCAAAAATCTTGCTTAACCTGCAAGAGGAGGTGACCTGTCCCATCTGCCTG
AAACTTTTGACAGAACCCGTGAGTCTAGGCTGTGGTCACAGCCTCTGCCAAGCCTGCATCACTGTGAACAACAAGGAGGC
AGTGACCAGCCCAGGAGGAAAAAACAGCTGTCCTGTGTGTGGTATCAGCTACTCATTTGAAAATCTACAGGCTAATCAGC
ATCTAGTCAGCATAGTGGAGAGACTCGGGGAGGTCAAGTTGAGTCAAGACAATGGGAACAAGAGAGATCTCTGTGATCGT
CATGGAGAGAAACTTCTACTCTTCTGTAAGGAGGATAGGAAGGTCATTTGCTGGCTTTGTGAACGGTCTCAGGAGCACCG
TGGTCACCACACATTCCTCATGGAGGAAGTAGTCAAGGAATGTCAGGTAGGGCCCTAGATGGAGGGACACGGGGCAGAAG
ATGGTAGCTGGTGGAA-GTCTCACCTTTCCATCCTTCTTT----------------------------------------
--------------------------------------------------------------------------------
--------------------------------------------------------------------------------
--------------------------------------------------------------------------------
--------------------------------------------------------------------------------
--------------------------------------------------------------------------------
------ACCCCTTGTGGTACCATAGTCCTGAGTCCCGTGATCTTCTCCATGTACGTCTTTCACCCTGTGCTCAGCTTCCA
ATGCCTGGGGTACATTTCTGG-TATTCCTTTCATTTACATACCAGATGATCCTAGAGTACAGTCTCTTAGCCAAGAGTGA
GAGATTTTTGTTTT-----TTCCTTTTTCATTATACAAGTGATCAATTCCTTCCCAAAGTTAGCTCTCTTGCTTCTCTAA
GCAGGATAATTTCTGAGGAACATTGTGGATTGAATGAGGAAAGAACATTGATAAGAGGAAAGGCCTTTCCTTTTGGCAGG
ATAAATACTTACTCTCAGGAAAGAGAGAATCAGGCTACTCCTCTTAAAGGGGTAGTAACTTTCATCACCAATGAATAAAC
AATACATTCATCTCTTCAAATTTTTCCCCATGTCATAGATTCTAATCACCAGCTTTACATTTAGGGTAAACTGCTC-TTT
TCTCGTATCAACTTGATTTCTTTCCCCTTTGTCCTCTATCCCGATACTGAGAAAGCTTATAGCTTGACTCTGGTGTGATT
CTTTTCTCATAGGAGAAACTCCATGCAATCCTCAAGAGGCTGAGGAAAGAGGAGGAGGAAGCTGAGAGGCTGGAAGCTGA
CATCAGAGAAAAGAAAACTTCCTGGAAGGCAAGAGGAGATTCCGAAGGATTTCTGAGACAGGAATCTTGACAGGACCTTA
ATCCAAGGAGACCTCATTCTTTTTTTCCCTTGACATCGCATGAGTCCTGCGGCCATTTGATTAGTTCTCTTCTCTGCCCT
GTCCCTGCTGGGTGTGGTGGCTGGACAGTGGACATGTTACAATT-ACACACACATACCTAGAACTGAGCACAAAGACAGA
CTCTATGATGAGGAAGGCTAGCAAATA-----------------------------------------------CT-TGT
TCCATTGCTGTTTTCCAATGAGGCTCTGCTACTTCTGGTGGAAGACACTAGATTAAGGACTAAGGTTTTCCTCAAGATTC
AAATCAGGAGTATGGTAAGGCAGGCAGTCATGAATATCCAGGAAAGCTGTCTAGAAGCTAAGACTTACTGTGTTTTACAT
TTTGTCTCAGGGTTGGCCTAGATAAGACAGCTTGAGGTCATTGCTTTGG-AAGTACTCAAAA-AACATAGTAGGAAAAAA
TAGCTTCCCTC-AAATACTGCTATTG------------------------------------------------------
--------------------------------------------------------------------------------
--------------------------------------------------------------------------------
--------------------------------------------------------------------------------
-----------CTTCCTTTCACTCCCTTGCTGGTTTGAAC----------------------------------------
--------------------------------------------------------------------------------
---------------------TCCCTGCTGGCTCCTAATCCCTTACACAATAGGCCCTCGGCCTGACAAACTGACTACAT
CTCTCTCTTGTCCATCCTTGCAGTATCAGGTACAAACTGAGAGACAAAGGATACAAACAGAATTTGATCAGCTTAGAAGA
ATCCTAAATAGTGAGGAGCAGAGAGAGCTGCAAAGATTGGAAGAAGAGGAAAAGAAGACGCTGGACAGCTTGGCAGAGGC
TGAAGATGATCTAGTTCGGCAGAAGCAGTTGGTGAGAGAGCTCATCTCAGACATGGAGTGTCGGAGTCAGTGGTCAACAG
TGGAGCTGCTGCAGGTAAGCGGGATCGCTCGGTCTGAGAGTCCGGAAACA--GTTTGTTATCTTTCCTTCTGTGTCCTGG
GGTTCTAATGCTGGTGGTGACATTAAGCGGTTTCTTTGGCCTAGCAGTGCCCCTTTATCATCCATTCTAGATGTCACGGA
TGTGAATGAATATAGACATTCTAGGGCAATGTCACATTGTTATTAATTTATGAAGTAAAGGAATACACTTAACCTTGCTG
AGAAGATCCATAATATCTAATGATAGTCAGTAGGCCCCTGTTCTATGTGATCTAGTGTTAGGCTTTTGTCAGACTTCTCT
TTACTCAGATTAGTCACAGGTAAACACATGTTGCATTTTCAGGTTTAAGAGTAAACACATTTAAGAAATGTGTTCTATTT
AAGTTTAAAATATACTTATTTGTT--------------------------------------------------------
--------------------------------------------------------------------------------
--------------------------------------------------------------------------------
--------------------------------------------------------------------------------
---------------------------ATTGCAGATATT-----------------------------------------
--------------------------------------------------------------------------------
--------------------------------------------------------------------------------
--------------------------------------------------------------------------------
------------------------------------CCCTGTTAATTCTTTTTAAACACGAAGTGATGGGATATTAAGCC
TTTTTGGGAGAGAGATGGACAAATATCTGGACAGACAGTGCTTCCCTTTCTTTGATAAATTTCCAGATATTTCTTTTTTT
AGTTTTGGAATGAAGCAGGGAA-TAATTGATTTTCATTTGTTGTATTGTTTCCTTTGTCTCTGGTGCTTATATCCCAGAT
TTCTGTT-TTTCCTTTTTCCTTTTGTCTTCTTTTTCTTGTTTAAATTTAAGATTACTCGGGAACAGAGGTTCCTAAACAC
ATTTTGCACTCATTAGGATGGCTATAATCAAAAAA-GACGGACAATACCAAGTATTGGGGAAGATGTGAAGAAATCGAAA
CCTTCTTGAATTGCTAGTAGAGATGTAAAATA--GTAAAGCTACTTAG-AAAAACTGCTTGGCAGTTGCTCAGAAACTTA
AAGGGAGTTCTCA-TGTGGCCTAGCCAT-CCATTCCTACATATATACCTAGAAGAACTGAATACAAATATCTGTGCATAA
ACTTATATATGAAAGTTCACAGCAGTATT---CAAAAATAAAAACAACTCAAATCTCCTTAA-CTAAGGAATGGATAAGC
AAAATGTGTTTTATTCAAACAATGTAATATTGTTTAGCTATGAAAAATAATGAAGCAATAATACATGCT--GACATAGAT
GCACCTTAAAAACATTATGATAATTGAAAGAAGGCAGACACAAAGTTCTTTTT-GTATGATTCCATTTATATGAA-----
-----AGTCAATACGTAGCAAATCCATAATACAGAAATTAGATTAGTGGTTGTCAGGGCTCTGGGGAAGAATAAATAGGA
AGTAAATGCTAATTAGTGCACAATTTCTATTTGTAATAATGAAAATGATCTGGA-TTTTCTATGCAATGATGGTTGCACA
ATATTGTGACTGTATTAAAACCTGTTA-----------------------------------------------------
--------------------------------------------------------------------------------
--------------------------------------------------------------------------------
--------------------------------------------------------------------------------
------AATTATGCACTGCAAAATGCAAATTTTTATGGTATTTGAACTACATTTCAGTAAAAACAAAAACAAAAAG-TTC
TGTAGGCCCTTTTTTATAGTTCTTCCATAAGCTCTTCACAACCCTTTGAATCGCCACCTTCACAAAAGAACACTGTGTTT
ATGTCATTTGTCCAGGCATTTGTCCTATTTAAGTCAGTCTTAGTTGTTAT-TTGGTCACTTGGAATTTAAAAAAATATTG
GAATATCAAAAATTATAAATACTGTAGGATTAACAATTCACATCTAGATGTTAACTTTAAAGAATGGCAAATGGA-----
--------------------------------------------------------------------------------
--------------------------------------------------------------------------------
--------------------------------------------------------------------------------
--------------------------------------------------------------------------------
--------------------------------------------------------------------------------
--------------------------------------------------------------------------------
--------------------------------------------------------------------------------
--------------------------------------------------------------------------------
--------------------------------------------------------------------------------
--------------------------------------------------------------------------------
--------------------------------------------------------------------------------
--------------------------------------------------------------------------------
--------------------------------------------------------------------------------
--------------------------------------------------------------------------------
--------------------------------------------------------------------------------
--------------------------------------------------------------------------------
--------------------------------------------------------------------------------
--------------------------------------------------------------------------------
--------------------------------------------------------------------------------
--------------------------------------------------------------------------------
--------------------------------------------------------------------------------
--------------------------------------------------------------------------------
--------------------------------------------------------------------------------
--------------------------------------------------------------------------------
--------------------------------------------------------------------------------
--------------------------------------------------------------------------------
--------------------------------------------------------------------------------
--------------------------------------------------------------------------------
--------------------------------------------------------------------------------
--------------------------------------------------------------------------------
--------------------------------------------------------------------------------
--------------------------------------------------------------------------------
--------------------------------------------------------------------------------
--------------------------------------------------------------------------------
--------------------------------------------------------------------------------
--------------------------------------------------------------------------------
--------------------------------------------------------------------------------
--------------------------------------------------------------------------------
--------------------------------------------------------------------------------
--------------------------------------------------------------------------------
--------------------------------------------------------------------------------
--------------------------------------------------------------------------------
--------------------------------------------------------------------------------
--------------------------------------------------------------------------------
--------------------------------------------------------------------------------
--------------------------------------------------------------------------------
--------------------------------------------------------------------------------
--------------------------------------------------------------------------------
--------------------------------------------------------------------------------
--------------------------------------------------------------------------------
--------------------------------------------------------------------------------
--------------------------------------------------------------------------------
--------------------------------------------------------------------------------
--------------------------------------------------------------------------------
--------------------------------------------------------------------------------
--------------------------------------------------------------------------------
--------------------------------------------------------------------------------
--------------------------------------------------------------------------------
--------------------------------------------------------------------------------
--------------------------------------------------------------------------------
--------------------------------------------------------------------------------
---------------------------------------------------------TTTTTTTTTAATATTGAACCAAC
CTTGCATTGCTGGGATATGTTCTACTTGGGCATTAGTTATAATCTTTTTGCTGGATTGCTGGATTTGATTTTCTTGTATT
TTTGTTGGAGAATTTTGTATTTATATTCATAAGAGATAGTGGCCTATGTTTTTCTTTTCTTGTGATGTCTTCAGTTCTTT
TATCAGGGTTATTTTATCAGAGTAGGATAAGTCTCATGTAATGAATTAGGAAGTGTTTCCTGCTCTTCTATATTTTTGAA
ATAGTTTATGAAGTTTTGATATTACTTCTTTCTAAACCTTTAGCAGAATTCACCAGTGAAGCCATCTGGGTAAGGTCTTT
TCTCTGTAGGAAGTCTTTGATTTTCAACTTAATCTCTTAACATGTTTTAGGCCTATTCTTATTTTCTGTGT--TCTTTAA
TCAGTATTAATAGTTTCTATATTTCTCGGAATTTGTTTATTTCATTTAGATTATCTAATTTGTTAGCATACAGTTGTTCA
TCATTTTTATAATCCTTTTAATTTCTGTGAGGTCAATGGTAATATCTCATCTTTCATTCCTGATTTCTTTTT-CTCGGTA
TGTCTAGCTAAATGTTTGCCAATTTTGTTGACATTTTCATACAACTCACTTCTGATTTTTCCATTTTTTT---CTATTGT
TCTTCTTTCTTTCATTAGTCTTATGCTAGTCTTTATATACTTTGACTCATGTTTTCTCTTTTCTTTCTAGGACATGAGCG
GAATCATGAAATGGTGAGTATGGATGGTCAAGAGTGGTGCTTGTGAGTTATAAAGAAGTGTTTGTAACTATTAG------
---GTAGTCAATCGGAATAAAAAAATCTCCCAGAGTAGTAAAATTTGGATGTAGCATTATCTTAAATTGCTGGTCCCAGG
TGAAGATTTGAGTTTTCCATAATTATTAAGAATGGATTCAATCCTATCGTAGTAAATTCAGTGGTTGAAGTTCAGAGCTA
GAACCAGAAAGGATATTAAGGATGAGAGCTTTTACCATCAGACTCCTGTGACTTGATTCATTTCATTCATCCTCTGTCC-
TGTATCCAGCCCTGGATTTTTTGTTTTATATATGTTTGTCATATCACATGGAGCACCTTATCAAATCCTAAAATAGGGCA
TGGAGATAGCTCCTTTATATTTACTTTGCTTACTCAAGAAAAGAAGGTACCAGATCATTATGAAAGGTTTTCTTT-----
--------------------------------------------------------------------------------
--------------------------------------------------------------------------------
--------------------------------------------------------------------------------
--------------------------------------------------------------------------------
--------------------------------------------------------------------------------
--------------------------------------------------------------------------------
--------------------------------------------------------------------------------
--------------------------------------------------------------------------------
--------------------------------------------------------------------------------
-----------------------------------------------------------AGATTTCCAAAAGCAGACTCG
AGCCTCAGGATGGTGGCTTTGACTCTGGTGACAATAATTGATCTCTGCCTGGTCACACACTTTAGAAGCTCCTATGGAAA
AATGTAGT-------CCTTGTGTCTAAAGTTGCCAACCCACTTGGAAACATCAAGTTTCTTACAAACACGTAAAATTCTA
AGCATCTTTAGTTAGGTAGTCCTAACTTCTCCTTTGCCAAGTGTTTCTGTGTCCTAGAGAATCTGAAATCTCAAATGTGG
-CCATACCACTGGAGTTCAGGCTTTGAACTAGGGCACAGGCTCACAGGCTTTCCTTGAAGAACCCCATATCACAGTTAGG
ATCTGCAGCGTCACTCTTGATTTGCCCAGAAACCCACATCTCCAGCCCCTCCCAGAAGATCCACTGAGATGCAGTGAGTT
TTCCACGTATCACATATCGTTTCTAAAGGTAGCAAAGTCTTTTCCTATGCATCATTTTATCCAATTTTGTACTGTTTCCA
TTAGATATCAAAGGAGGGTTTAATTATTTCATTTTT--AAGGAAGAAACTG--CTTTCAAGAAATGAAGACCTTCTCAAG
GGCACCGAGAGGATAAGAGGGAAAGTAGGCACGAACACGTTTCTTCTAGCTCCAGGATCAGGCTCTTTCTTCTC-TCCTC
CTCAGACTTAGGAAGGAGGATTCAAGTGCATCAGTGATGTGAAGGAGATGAAATCAGTGGTGTGGGAGTGATGGACATAG
GATGAGAGATGTGGGGGTCAAAAAATTTTTGTCATCCCTAGGAGTGAGATCTGGAGGCTGAGAAAGCCAAAAACTCTTTC
CCAGAAACTGAAGACTGTATTCCATGCTCCAGATCTGAGTAGGATGCTGCAAATATTTAGAGGTGAGGAGAAGCAGATAA
AGACTGTGGATGTGGGATTGTTGTGGTGTCAGGTAATAAACTGTCTGGGTGGGATGACTTAAAATTGAGGACAGAAGAGA
GGAGGGAGGTCAGAGAATAAGGAATATTCTGTGATAAGGAGGATATGTTTATATGTAAAAGAAAATGGCTAGGTGTCTGG
TTTATCTTTT-AATTCACTAGCTCAAAGCTTCACGGTATTCCCTTCCCCTGTCCCTACTCTAAACAATAGGTAGCTATCA
GTGCTTACTCCTTTGTTTCTAATCAGCATCACTGAATCTTTTATTATTTCAGAACTGACAGCTGTCCGATGCCACTGGGG
TAAGAAAAAGTTTCAGTCTTTAAATAACTGTGTTCCAGTTACCTTTCAGAAGTTTGTGGTTTGCGGTTTCAATGATATCC
TCTAATCTTAGCCTCATTCCTTCTCAGCACCTCCCAAAACATTTGCATAATACATTTCTCCAGTGTTTTACTCCCTCCCA
TAATT-CATCAATGCATATTTTTCAGTCACTTCCCGAGTTCCTTCAT-----------AAGATAAACTTACTCCAT-ATC
TGTCACCTAATCATATATATCACATAGATGATTATATTCATATACATATATAATATATATATATA---------------
---------TTTTTTTTTTTTTTCTTGCAGTGGATGTCACAATGAATCCAGTCAACCTAAATTTGAATCTTGTCCTTTCA
GAAGATCAGAGACAAGTGATATCTGTGCCAATTTGGCCTTTTCAGTGTTATAATTTTGGTATCTTGGGATCCCAATATTT
CTCCTCAGGGAAACATTACTGGGAAGTGGACGTGTCCAAGAAAACTGCCTGGATCCTGGGGGTATATTGTAGAACACATT
CCCGCAATACAAAGTATGCCATTAGAAGATGTGCAAAT---------GTTTACTTGAAATATAGACCTCTATTTGGCTAC
TGGGTTATATGGTTACAGAATAAATGTAAGTATAGGGCCTTTGAGCAGTCTTTGTCCTCTGATTTTGAGGTTTTGACTCT
CTCCATGACTGTGCCTCCCTGCCGTGTTGGGGTTTTCCTAGACTATGAAGCAGGCATCGTCTCATTTTTCAACGTCACAA
GCCATGGGTCCCTCATTTACAAGTTCTCTAAATGTTGCTTTTCTCAGCCTGTTTATCCGTATTTCAATCCTTGGAACTGT
CCAGCTCCCATGACTCTGTGCCCACCAAGCTCTTGAATTTTCTCCTTTCTTCACCTACAACCCTTTGTCTTGACTCATCT
CTTGCATCTGACTCATCTGCAACGTTCAGACCATTGCTTTCTTATGGTTTCCCTTCCTTACTTTAGAACTTTCACTCATC
CTTGAGATGTACAGTATATTTGGCTTGAGTTATGAGAGATCCTTATTTATTCATTGACTCTTTTTAATATTTTCAGAGAA
AGTTACCTAATTCCTCTTAAAGGCACAGCAGTATTGATATAACATCTCTGCCTTCTCATTTCTCTGTGTTTTACTTTATC
AGTGATGTGAAGAGGCCCAGAGCCTGTTATCCACTATCCATGCTATCTAGGTGGTCCATAGGAACCACCCCCAAGACCAC
CACCAACATCAACTAAAGGCTCTTTCAGAGTATGTCAGTGTGTTGCTCAGGATACCCCAGGTACATCAAGGAATCAAGGA
GAGAAAAATCTTATCAATATGTGTATTCAGAGAGAAGATTTTATGTCCAGAGTATTTGAGCTCAAACCCTGTCTCTTGTT
TTCTAATCATGTTGAATACTTTCTCAGTTTTTTGTACCTGAAATACAAATTGTGATCTAAGCCTGCACCTGACATTTTGG
GCTGAATAAAAAAAGAA----AAAAAAAAAAAGACTGAACCTAACTATTAAGATCGTTGTGTAAAACTAAATGTCTCTAA
ATGTAATGCACCAATTTAGTGTCTGGAACATAATAAATATTTGCTCTCATGATTACT-AAAA
>Callithrix_jacchus_TRIM34
ACCCTGGCTTTTCTTCACCTCTTCAGCCAGGACCCGAGATTTCCGTTGGCCTGAAGGTGTGTGGGGAGGTTTGT-GGGGG
GTAGAGGGTATAAGACTCCAGGAGAAAAGTTGTGAATGAAGTTGGGGGAATTTGATTTGTGGACCC----------TGCA
GTGTTGGGAGCAAAGGCTAGCTTGCA-GCTTCCTGCTTTGAGTGCAC--TGATCTGCTCTCTGACCGCAGCCTACAGTCC
GGGGAGGGACAGCCTTAAAGGGAGTGTTAAAGAGGCCGCAGGCCTCCTTTGTTTTCTGGCCTGACTTCTTTTTTTT----
-CTCCAGGCTGAATCTGTTTCCATTCC-TTCCTATTCCATAGTCTTGATTTTCTACCTTGCAAAGGAAACTGAATTCTCT
CTCTCTCTTCTTTCTCT--------GTCTTAAAGAGACCAACAACAAAA-CAGAAA---CGAAAACAA--------AAAG
AGATGAACAGAAGATCTCTTCTTTTCCACCCCTT-CTCTCTTCTC-----AGAAGGTGGTGAGAGGAGGTCT--GTTTTC
CAAGCCTGTGCAGGCCTGAGCTCCTAGTATGCGGCTTTACATAGGATGGAACCAGA-GGGGGGCATGACCAGGGGAAATA
TTGAAGCGAGTTCTTTCACTGCCCTCCTGGCAACCATTAAGGCGCTTTCGGTAGCCATCCTCACATATCCTTCATCCTCG
GCCTGCCAGAGAGCAGCAGCTTGAGTGATCTGACTGCTGCACACCACTCTGTTCCCCCTTGCCCTGTGTCACTCTGCAGC
TGGTCTCAGGGCTCTCCTTGCACGTCCCTGAACATACCTG----------------------------------------
--------------------------------------------------------------------------------
--------------------------------------------------------------------------------
--------------------------------------------------------------------------------
--------------------------------------------------------------------------------
--------------------------------------------------------------------------------
-----------------------------------------------------TTTACTTTTACTTCAGTAACCCACATG
CCACCAGCGTCTTCACCTGTCTTAGATCTTGTTCCTCATCATTCTTCCTCTTAGACACACCTGTGCATTGATTTCTAACC
TCAATTTCTTA-TTGTTTTTCTTTGCTCAGAACTACTTAACAGAAGTTGTTTATTGTGGGCTCAGAAGGCACCCACAGAT
TTAATCTTCTTGTT------------------------------------------------------------------
---------------------------------------------------------------------------AAGAA
TTTGACATA-GAGTATGTCCTATCTTAAGCTCGCTTGTGAGCAATTTG----TACCTTGATTGGTATGTTACAGATATTC
TGACACATGCCATTCTGGCCTCCGCTCTCGCCCTTCAGAGTTCACTGTAACTGCCTTTCTTTGTCTCTGCCTTACTCCTG
GGTAGAATCCATGTCTGCCTACATACTGACTGTCTCCCAGATGCATCTAGTCAGGCACAAGGCCCAAACATATGGGATAA
AATTGATTACAAAGCAGGCTGCTGGTGTGAAAATGTGCAATTAGCATCCATTCAACATTCAATAAATAAATGTGAAATAT
ACATGGAGGTCTACATTTTAATTAGAAAGCAATCATAGACCATATCACTAAATGATAGTGTACACAGGAAAATGACTAAT
ACTATGGAGTAATATCTTT-------------------------------------------------------------
--------------------------------------------------------------------------------
--------------------------------------------------------------------------------
--------------------------------------------------------------------------------
--------------------------------------------------------------------------------
--------------------------------------------------------------------------------
--------------------------------------------------------------------------------
--------------------------------------------------------------------------------
---AAGAAGTTAAATTAGGGTAAGGACTCTGTAAAGACCTCGTAAAGTCCTTG---------------------------
--------------------------------------------------------------------------------
--------------------------------------------------------------------------------
---------------------------------------------------------------------CAGCTGTAAAT
AGTTTTTATGAAAGTTTTAAATAGATTTCATTGTAAGAAGACTACATTTGAATAGAATCTTAAGAAT---GTGAGGAAAT
TAA-GGCTTTAG-TGGTTTTTCCC-TGGGCTTAAACGGAGAGCAGTGTGGATATGGAAGATTGAGATTGGAGTGTGCAGA
GAGAGGAATAGAAGATGAGCTCTG--------------------------------------------------------
--------------------------------------------------------------------------------
--------------------------------------------------------------------------------
--------------------------------------------------------------------------------
---------------------------------AGGATTGAGGCAGTGGGAAGGGCTGTGTGATGTGGACCTAACTGGAC
CATTATGAAGTCTGGCCTCACTCTGGATGGCATGGGTTTGAATAGAAGAGTGACATGAT---TGACATCT-GCTTTAAGG
TGATCACCCTGTCTAC-------AGAACAGAGATGAGAATGGAGAG-AGAAGAGCAATGATGGCTGGGTGCAGTAGCTCA
TGCCTATAATCCCAGCACTTTGGGAGGCTGAAGCGGGTGGATCACCAGAAGT----CAGGACTTTAAGACCAGCCTGGCC
AACATGGTGAAATCCTGTCTCTACTAAAAATACAAAACTTAGCTGGGCATGATGGCATGTATCTGTAATCCCAGCTACTT
GGGAGGCTGAGGC-AGAAAATCACTTGAATCC--------------GAAGTGAGCCGAGATCGTGCCACTACACTCCAAC
CTGGGTAACAAGAGTGACACTCCATCTCAAAAAAAAAAAAAAAAA--GAAGAAGAAGAAGGGCAATGATAGGATCAGCAA
GACTAGTGGGAGAACAATTTCCTGAATTCAGGTGATTTCTATTGGAGTGGTGAGAGTTGAGGTGGTTGGAA-CTAATTTG
AAAACAA---------------CTCAGCATATTCGCATGAAGTAACAGA----AAAAGACAAGATTACGAGTTGATTAAT
AAAAATGATTCTGCGTTAAAAAATAA--------------CTTTTTGGAAATCTATTGAGCAGAACGCGTCAGCTCTTGG
GGAGAGAGTCATTATTGTGGTATAGATTGAGCCCTGGACTCTAAGGAATAGCTGAAGCAAGAACTCTGTGCACAGAGGAC
TGAGGAGGAGATGTTGCGATGTTTCTGAGTTCTCCCGGCCTCTGAATGTCAACACAGGCT-TACTTTCCTTGTTGGCAGT
TTCTGACTAAGGAACCAGAAGAATTGTCTAGGAGATTGTCTAGAAACTTGAAAAGACATCCTCCCC-TAAAAGTCACTCT
TAGAGACACTCTAATTTTACTATCTAATCTGCAGAGAGACTTA-GAGTTTGCATTATCATATCCAGGTGTTAGGAATCCA
GATTTTAGGAGAAGACTCAAATGAAGGGTGCAGTCATCTGGCAGCTGTGGTAACCAGGCAACCTGGGAGTTCTGTTAGGC
TGAGAGCCCTCATGTTCCCTTCTCTACCTCCCTGACGACAGCTGCTGGACTTGGGCCCCACTGAGAAGTGATGGAGTCAT
TTCTCACATGCGGGACCCTGGCTGCTCTGCACTTTTCTCATTGTTTTGCCACTGTGGTGGCAGCAGCTTTGGCATCAACA
TGCAGCCTCACCATGAACATGAAGTCCCAGCCCATGGCAGA-TGCATGTTCTACTACTTCCTCTCCTGGAGGCCCCTGCT
ATTTCTCACTATTGATTGGATACGTATTGGAATAAAAGATAA-AAA-AACCCCATGTCTGTGGTTGGCTCATAAGTTTTA
GCCATAAACAAGGGTGAATATTAT---ATCATGTAAACTCCTGGTCTTGCTAGTCATCAGAGCCTGGTCTGACTCATGGT
CATTGTAGCCAGGGG-CTACCACCATATCGCTTTTGTGTGACTTTTAGTATCTATGCTGTTGGCTGGATTACACTCGCCA
GCTAACTTTCAGCCTTTTTTCCTATTTAAGGTCTTTTGGTAGATTGTTAGAGGAGTAGACAGGTCTCAAGGCCTAGATTT
ATCTCCATAGAGCTTT-CATCGTGCCCCACCCTTTTGCCAAGTGTGGGGAAGATTCCTGGATTGTCACACTT-CACAGAT
CTTTCTTTC----ACTTTCAAACCTTTTCAATTGTATTCGTTTCCTAGCACTGTTGTGACCAATTATCACCAACTAGATG
ACTTAAAACAATAGGGATTTTTTTTTTTTTTTTTTTTTTTTTTGNNNNNNNNNNNNNNNNNNNNNNNNNNNNNNNNNNNN
NNNNNNNNNNNNNNNNNNNNNNNNNNNNNNNNNNNNNNNNNNNNNNNNNNNNNNNNNNNNNNNNNNNNCCTGGCGTCTGG
TGGTTTCTAGCCAACTCTGTTATTCTTTGGCTTATATCTGTGCTGCTCCCATCTCTGCCTCTATTGTTACATGGCTTTCT
TTCCTGCTTGTCTTTATGTCCTCTCCTCTTCTTATAAGAATACAGATC--GGCCGGGCGTGGTGGCTCAAGCCTGTAATT
CCAGCACTGTGGGAGGGCGAGGCGGGTGGATCAC--GAGGTCAAGAGATCGAGACCATCCTGGTCAACATGGTGAAACCC
CATCCCTACTAAAAATACAAAAAATTAGCTGGGCATGGTGGCGCGTGCCTGTAATCCCAGCTACTCGGGAGGCTGAGGCA
GGAGAATTGCCTGAACCCGGGAGGCAGAGGTTGCTGTGAGCCAAGATCGCGCCATTGCACTCCAGCCTGGGTAACAAGAG
TGAAACTCCGTCTCAAAAAAAAAAAAAAAGAATACAGATCATTAAATTTTGGGCCTGTCTTTATCCAGTATGACCTCATC
TTAACTTGA------TAACATCTGCAAGGATGTAATTTACAAATAAGGTCACATTCACATAAGCGAACTTATTTTTGTGG
AGGGTATAATTCGGTCTACTAGAGCAAGTATCAAAATGTTACTATCT----ACTGACATCTACCCGTTTTCCTTTTGCCT
CACGGTTTCTTGTCTAAACCAACTTTAGGTTCTGAGAATTGGCATTGTATCACCATGCCACCACTCTGTGGTATTACCCG
CTGACTGACTACAAGCAATAATTGTAGGTTTGTTTTGCTATTTGGACTCATGCAATTTAACTCCGCAGGGGGAATACAGG
ACAGGAGACACAGCATGCAGGCAGGCAGGGCCGCTTCAGGTAAGCTCTCAGTGAGGATTCTT------------------
--------------------------------------------------------------------------------
--------------------------------------------------------------------------------
--------------------------------------------------------------------------------
--------------------------------------------------------ATGGCAGTACAAGACCAAGTG---
-----GATTTGTGTGAAACTGGCATAGCTTAGGTAAACCTTACATCAACAGACTGGTTCCCTTGTAAAGACCATGAGTGT
GGCTTCCAGGGCCCTACAGAGAATGTTT-GGTACAGGATTCTCAACCATCTTGTGGAAGCTGGGGTCTATGCTTACCAAA
ACAGAACAAATTAATATAATTAATATAATATAATATACCAGGGGAAGGTGATGGCTATGCCTTTTTTATAGAAAGAAAGG
ACTT-AAGCCTAA---TAACCTTTTTTTCCCC-TCATGTCTAGTCTGGCTTCCAGTCTTATTTCCTCTACCTCACTCTAT
ATCTCACCCTCATCTGCTTTTCTCT---------GTTAACTCATCCTGCATCCTCCCATCCCTGCCCTCACCTCCTATTC
ATTGGAAAGAGACTGGCGCTTTCACTTCATTTAGGAAGTGTCACATATCCAGGTTCCTCCAGGTCCATGTGATGCCAAGG
GTTTAGGGCTATTTGCATACCAGCCACACATTCAAAAACTTTTGAAGATGGTATGATGGTTTGTCCT---TGAAT----G
GGGCATTTACTTACATGATTCTTTCTACCTAAAATATTTTTTT-CTTTCTCATTTTGTATTCCTTTCTCATAATTCAGCT
TTCATTTAAACTCTTATTTATCCAAGCAAGATATCTTGGATAGTCCTGTATTTGGCAAATTATTTGATTTTCCAAAAACA
TATACCTCTATATGATGGTGTTTTTTTACACC-----------------TACCATTTTACACTTTATGAATGATTATATG
ATTAGCTTCTGTCTTCTTTAGGTGATTATTTACTTCATTCTGG-TAATACCATCTGTTCAT-ACTCAACTTTGGATTTTA
ATCCATTTCCTGGATTTTAATCACTGAAGATAATGTGTCTTCAGTGAGAATTTCCTAAATAAACAAATGAATAATTGGCG
TTCAATTAGTGGATGTGGATTTAACACAGACAGGA---CCTCATTGCTCCAAAATGTGGTCTCCCCTTATATGTTGGGAT
ATCTCTCCCATGACCAACAGCCATCTCATTTGTATTTCTATTCCTCAGTGATCTGACATTGGTATGAATCTGTAATCTAT
GTGTAACTCAGCTGGTTACATGCCCTCCCCCAACAAATACACACCTTTGAGTTCCTAT-------TATAACATGCTTTCA
GGCCAAGATAAAATCAATCACACCATCTACAAACACAAGACCCCCC-AGAAATTCCCAACTTACCTGGTTTCCTCTATTT
CTACACTC--TTAACACTGGATCTCAATCTACTTTTTTCAGGCTTTACCTCTGATTTTCTTTGTTTAAATAAGTGGAGTA
GCATGGAGACCCCTGAAAGAGAACCCTGAGATTATTATGTTCAATCCAATTCTACCTATAAAATTGAATGATCTTTGTAA
GTCCTTTGATTTTATTTATTCATCTGAA-GAAAGGAAGTACTCTTACTT---TTTCTTTTTTGAGATGGAGTCTTGCTCT
GTTTCACCCAGGCTGGAGTACAGTGGCGTGATCTCAGCTCACTGCAGCCTCTGGCTCCCGGGTTCAAGCAATTCTCCTGT
CTCTGCCTCCCGAGTAGCTGGGATTATAGGCACACTCCACATCACCCGGCTAATATTGTATTTTTAGTTTCACCATGTTG
GCTAGGCTGGTCTCAAAATCCTGACCTCAGGTGATCCACCCATCTTGGCCTTCCAAAGTGCTGGGATTACAGACGTGAGC
CAGAACACCCTGCCTCTGGAGTACTCTTATTGCTCAAGGATTTTTGGAGGAGGAACAAATAGGCCAAAGTCATTTATAAA
TTG-AACTGGTAAGTAAATCTCCATATTGCAGTCATTGCTCTTTCTGTGGGTATCTCTGGGAAGTGTGTGAGCATATGGG
AGGACTCTGTGTGGGTAGGTGTGTTAGGAGGTGAGCACTTCTTCACTGGAAACCACATCTGGGACTCCACAGTCCAGCTA
TTGAGGAATTTTCAAATAATGGAAT-AAAAGAAAAA-GAAACACTGGGATCCAAAGTGGCTCCTGCCGGATGTCGTGGTG
CTTGCGAAGGTGAGGTCATGAGTTCAAGGCTAACCTGAGAAACCTTACAAGCTCACATTGATTGGCAAAAAAAAAAAAAA
GAAAAGAAAAGAAAAAGAAACACTGATAAGAAGGTTTT---------------AGTCATCTATGG-GGAGAT-GGGAAAG
TTTTT-----AATATTTTTATCAAACATTGTACTTCACTGTGTTCTAAACACTGGAGCTATAGCAGTAAA----------
--AAAAAAAACAAAAGTACCAAATTTATGTGTGGATTATATTTTAGAAAGAAGAGGTAGACATTTAAAGATAGACGGTGA
TAATA---------------------------------------------------------------------------
--------------------------------------------------------------------------------
--------------------------------------------------------------------------------
---------------------------------------------------------------------------AAAGA
T-ACAAATGTACACCGAATAATGAGTTTGTGGTGGTGCTATAGTT--GTTTGTCTTAGCAGACCCTTCTGATAAAGGGAC
TTGTCAGGA-AAAGTTGAAAAAAAA-GTGTAAATGGAAGTCATGCAAATAGCAACAGGA---TAATTCTAGC------AA
CGAACAGGTGCAAAAGCCTTGAGGCGTTAACAGCTTGCCCAGACCACCTTCAGACATTTTTGGTTTCTCTTCCTCATCTT
TTTT-GTTTTTCGGTATTGCAGTCTTGGCCAGTCTTTGATGTGTGTGCACTTATAATGCTTTTTATTTGTACCATTCTTA
TACCATCCCCTTTCAATCTTCTCAGCCATCCAGGGGTCTTCAAGCAAGAAGAGAGAA-----CCTCAGGAGTTAGAACCA
GAAGACGCCAGGGAAGCAGTGCAATGGCTTCAAAAATCTTGCTTAACCTGCAAGAGGAGGTGACCTGTCCCATCTGCCTG
AAACTTTTGACAGAACCCTTGAGTCTAGGCTGTGGCCACAGCCTCTGCCAAGCCTGCATCACTGTGAACAACAAGGAGGC
AGTGAC------------------TAGCTGTCCTGTGTGTGGTATCAGCTACTCATTTGAAAATCTACAGGCTAATCAGC
ATCTGATCAACATAGTGGAGAGACTCAGGGAGGTCAAGTTGAGTCAAGACAATGGGAAGAAGACAGATCTCTGTGATTGT
CATGGAGAGAAACTTCTACTCTTCTGTAAGGAGGATAGGAAGGTCATTTGCTGGCTTTGTGAACGGTCTCAGGAACACCG
TGGTCACCACACATTCCTCATGGAGGAAGTAGTCAAGGAATGTCAGGTAGGGCCCTAGATGGAGGGACATGGGGCAGAAG
ACGGTAGCTGGTGGAA-GTCTCACCTTTCCATCCTTCTTT----------------------------------------
--------------------------------------------------------------------------------
--------------------------------------------------------------------------------
--------------------------------------------------------------------------------
--------------------------------------------------------------------------------
--------------------------------------------------------------------------------
------ACCCCTCGTGGTACCATAGTCCTGAGTCCTGTGGTCTTCTCCATGCACATCTTTCACCCTGTGCTCAGCTTCCA
ATGCCTGGGGTACATTTCTGG-TTTTCCTTTCATTTACATACCAGATGATCCTAGAGTACAGTCTCTTAGCCAAGGGTGA
GAGATTTTTGTCTT-----TTCCTTTTTCATTATATGAGTGCTAAATTCTTTCCCAAAGTTAGCTTTCTTGCTTCTCTAA
GCAGGATAATTTCTGAGGAACATTGTGGATTGAATGAGGAAAGAACATTGATAAGAGGAAAGGACTTTCCTTT-GGCAGG
ATAAATACTTACTCTCAGGAAAGAGAGAATCAGGCTACTCCTCCTGAAGGGGTAGTGATTTTCATCACCAATGAATAAAC
AATACATTCATCTCTTCAAATTTTTCCCCGTGTCATAGATTCTAATCACCAGCTTTACAGTTACGGTAAATTGCTC-TTT
TCTCGCATCAACTTGATTTCTTTCCTCTTTGTTCTCTATCCAGATACGGAGAAAGCTTATAGCTTGACTCTGGTGTGATT
CCTTTCTCGTAGGAGAAACTCCATGCAATCCTCAAGAGGCTGAGGAAGGAGGAGGAGGAAGCTGAGAAGCTAGAAGCTGA
CATCAGAGAAAAGAAAACTTCCTGGAAGGCAAGAGGAGATTCTGAAGGATTTCTGAGACAGGAATCTTGACAGGACCTTA
ATCCAAGGGGGCCTCATTATTTTTGTTCCTTGACATTGCATGAGTCCTGCAGCCATTTGATTAGTTCTCTTCTCTGTCCT
GTCCCTGCTGGGGATGAAGGCTGGACAGTGGACATGTTACAATT-ACACACACATACCTAGTACTGAGCACAAAGATAGA
CTCTATGATGAGAAAGGCTAGCAAATA-----------------------------------------------CTGTGT
TCCATTACTCTTTTCCGATGACACTCTGCTACTTCTGGTGGAAACCACTAGATTAAGGACTAAGGTTTTCCTCAAGATTC
AAATTAGGAGTATGGTAAGGAAGGCAGTCATGAATATCCAGGAAACCTGTATAGAAGTTAAGACTTACTATGTTTTACAT
TTTATCTC----TTGGCCTAGATAAGACAGTTTGAGGTCATTGCTTTGGTAGGTACTGAAAA-AAAATAGTAGGAAAAAA
TAGCTTCCCCC-AAATACT---GTTG------------------------------------------------------
--------------------------------------------------------------------------------
--------------------------------------------------------------------------------
--------------------------------------------------------------------------------
-----------CTTCCTTTCACTACCTTGCTGGTTTGAAC----------------------------------------
--------------------------------------------------------------------------------
---------------------TCCCTACTGGCTCCTAATCCCTGACACAATAGGTTCTCAGCCTGACAAACTTATTACAT
CTCTC-CTTGTCCATCCTTGCAGTATCAGGTACAAACTGAGAGACAAAGGATACAAACAGAATTTGATCAGCTTAGAAGA
ATCCTAAATAGTGAGGAGCAGAGAGAGCTGCAAAGATTGGAAGAAGAGGAAAAGAAGGAGCTGGATAACTTGGCACAGGC
TGAAGATGATCTAGTTCAGCAGAAGCAGTTGGTGAGAGAGCTCATCTCAGACGTGGAGTGTCGGAGTCAGTGGTCAACAG
TGGAGCTGCTGCAGGTAAGAAGGATTGCTCAGTCTGAGATTCTGGAAACACAGTTTGTTACCTTTCCTTCTGTGTCCTGG
GGTTCTCATTCTGGTGGTGACACTAAGGGGTTTCTTTGGCCTTGCAGTGCCCGTTTATCATCCATTCTAGATGTCATGGA
TGTAAATGAATATAGGCATTCTAGGGCAATGTCGCA---CTGTTA-TTTATGAAGTAAGGGAATACACCTGACCTTGCAG
AGAGGATTCATAATATCTAGTTATAGTCACTAGGCCCCTGTTAAATGTGCTCTAGTGTCAGG-TTTTCTCAGTCTTCTCT
TTACTCAGATTAGTCACAGGTAAACACATGATGCATTTTCAGGTTTAAGAGCAAACACATTTAAGAAATGTGTTCTATTT
AAGTTTAAAATATACTTATTTGTT--------------------------------------------------------
--------------------------------------------------------------------------------
--------------------------------------------------------------------------------
--------------------------------------------------------------------------------
---------------------------ATTGCAGATGTT-----------------------------------------
--------------------------------------------------------------------------------
--------------------------------------------------------------------------------
--------------------------------------------------------------------------------
------------------------------------CCCTGTTAATTCTTTTTAAACATGAAGTGATGGGATATTGAGCC
TTTTGGCGAGAGAGATGGACAAATATCCAGACAGACCATGTTTCCCTTTCTTTGATAAATTTCTAAATATTTCATTTTCA
CGTCTTGGAATGAAGCAGGGGAGTAACTGGTTTTCATTTGTTGAATTGTTTCCTTTGTCTCTGGTGCTTATATCCCAGAT
TTCTTTT-CTACATTTTTCCTCTTGTCTTCTTCTTTTTGTTTAAATTTAAGATTACTCTGGAACAGAGGTTCCTAAACAT
ATTTTGCACTCATTAGGATGGCCACAATCAAAAAA-GATGGACAATACCAAGTACTGGGGAAGATGTGAAGAAATCGAAA
CCTTCTTGAATTGCTAGTAGGGATGTAAAATA--GTAAAGCTACTTAG-AAAAACTGCTTGGCAGTTGCTCAGAAACTTA
AAGGCAGTTCTCACCGTGGCCTAGCCAT-CCATTCCTACATATATACCTAGAAGAACTGAATACATATATCTGTGCATAA
ACTTATATATGAAAGTTCACAGCAGTATTGTTCAAAAATAAAAACAACTTAAATCTCCTTAA-CTAAGGAATGGATAAGG
AAAATGTGTTATATTCAAACAATGTAATGTTGTTTAGCTGTGAAAAATAATCAAGTAGTAATACTTGCT--GACATGGAT
GCACCTTGAAAACATTATGATAATTGAAAGAATGCAGACACAAAGTTCTTTTT-GCATGATTACATTTATATGAA-----
-----AGT-TATACATAGCAAATCCATAATACAGAAATTAGATTAGTGGTTGTCAGGGCTCTGGGGAAGAATAAATAGGA
AGTAGTTGCTAATTAGTGCACAATTTCTATTTGTAGTGATGAAAATGATCTAGA-TTTTCTATGCAATGATGGTTGCACA
ATATTGTGACTATATTAAAACCTGTTAGGCCGGGCGCGGTGGCTCATGCCTGTAATCCCAGCACTTTGGGAGGCCGAAGC
TGGTGGATCACAAGGTCAAGAAATCGAGACCATCCTGGTCAACATGGTGAAACCCCGTCTCTACTAAAAATACAAAAAAT
TAGCTGGGCATGTGGCACGTGCCTGTAATCCCAGCTACTCAGGAGGCTAAGGCAGGAGAATTGCCTGAACCCAGGAGGCG
GAGGTTGCGGTGAGCCAAGATCATGCCATTGCACTCCAGCCTGGGTAACAAGAGCAAAACTCCATCTCAAAAAAAAAAAC
CTGTTAAATTATGCACTGTAAAATGCAAATTTT-ATGGTATTTGAGCTACATTTTAGTAAAAACAAAAACAAAAATGTTC
CATAGGCCCTTTTTTATAGTTCTTCCATAAGCTCTTCACAACCCTTTGAATCGCCACCTTCACAAAAGAACACTGTGTTT
ATGTCATTTGTCCAGGCATTTGTCCTATTTAAGTGAGTCTTAGTTGCTAT-CTGGTCACTTGGAATTTTAAAAAATATTG
GAATATCAAAAATTATAAATGCTGTAGGATTAACATTTCACATCTAGATG----------------GCAAATGGA-----
--------------------------------------------------------------------------------
--------------------------------------------------------------------------------
--------------------------------------------------------------------------------
--------------------------------------------------------------------------------
--------------------------------------------------------------------------------
--------------------------------------------------------------------------------
--------------------------------------------------------------------------------
--------------------------------------------------------------------------------
--------------------------------------------------------------------------------
--------------------------------------------------------------------------------
--------------------------------------------------------------------------------
--------------------------------------------------------------------------------
--------------------------------------------------------------------------------
--------------------------------------------------------------------------------
--------------------------------------------------------------------------------
--------------------------------------------------------------------------------
--------------------------------------------------------------------------------
--------------------------------------------------------------------------------
--------------------------------------------------------------------------------
--------------------------------------------------------------------------------
--------------------------------------------------------------------------------
--------------------------------------------------------------------------------
--------------------------------------------------------------------------------
--------------------------------------------------------------------------------
--------------------------------------------------------------------------------
--------------------------------------------------------------------------------
--------------------------------------------------------------------------------
--------------------------------------------------------------------------------
--------------------------------------------------------------------------------
--------------------------------------------------------------------------------
--------------------------------------------------------------------------------
--------------------------------------------------------------------------------
--------------------------------------------------------------------------------
--------------------------------------------------------------------------------
--------------------------------------------------------------------------------
--------------------------------------------------------------------------------
--------------------------------------------------------------------------------
--------------------------------------------------------------------------------
--------------------------------------------------------------------------------
--------------------------------------------------------------------------------
--------------------------------------------------------------------------------
--------------------------------------------------------------------------------
--------------------------------------------------------------------------------
--------------------------------------------------------------------------------
--------------------------------------------------------------------------------
--------------------------------------------------------------------------------
--------------------------------------------------------------------------------
--------------------------------------------------------------------------------
--------------------------------------------------------------------------------
--------------------------------------------------------------------------------
--------------------------------------------------------------------------------
--------------------------------------------------------------------------------
--------------------------------------------------------------------------------
--------------------------------------------------------------------------------
--------------------------------------------------------------------------------
--------------------------------------------------------------------------------
--------------------------------------------------------------------------------
--------------------------------------------------------------------------------
--------------------------------------------------------------------------------
--------------------------------------------------------------------------------
--------------------------------------------------------------------------------
---------------------------------------------------------TTTTTTTT-AATGTTGAACCAAC
CTTGCATTTCTGGGGTATGTTCTACTTGGGCATTAGTTATAATCTTTTTGCTGGATTGCTGGATTTAATTTTCTCGTATT
TTTGTTGGAGAATTTTGTATTTATATTCATAAGAGATAGTGGCCTATGTTTTTCTTTTCTTGTGATGTCTTCAGTTCTTT
TATCAAGGTTATTTTATCAGGGTAGGATAAGTCTCCTGTAATGAATTAGGAAGTGTTTCCTGCTCTTCTATAATTTTGCA
ATAGTTTATGAAGTTTTGATATTACTTCTTTCTAAACCTTTAGCAGAATTCACCAGTGAAGCCATCTGGGTAA-------
-CTCCATAGGAAGTCTTTGATTTCCAACTTAATCTCTTAACATGTTTTAGGCCTATTCATATTTTCTGTGT-TT-TTTAA
TCAGTATTGATAGTTTCTATATTTCTAGGAATTTGTTTATTTCATTTAGATTACCTAATTTGTTT--------------A
TCATTTTTATAGTCCTTTTAATTTCTGTGAGGTCAATGGTAATATCTCATCTTCCATTCCTGATTTCTTTTT-CTTGGTA
TGTCTAGCTAAATGTTTACCAATTTTGTTGACATTTTCACATAACTCACTTCTGATTTTTCCA--TTTTT---CTATTGT
TCTTCTTTCTTTCATTAGTCTTACGCTAGTCTTTATA-ACTTTGACCCATGTTTTCTCTTTTCTTTCTAGGACGTGAGTG
GAATCATGAAATGGTGAGTATGGATGGTCAAAAGTGGTGCTTGTGAGTTACAAAGAAGTGTT-GTAACTATTAG------
---TTAGTCAATCAGAATAAAAAAATCTCCCAGAGTAGTAAAATTTGGATGTAGTATTGTCTTAAATTGCTGGTCCCAGA
TGAAGATTTGAGTTTTCCATAACTATTAAGAATGGATTCAATCCTATAGTAGTAATTTCAGTGGTTGAAGTTCAGAGCTA
GAGCCAGAAAGGATATTAAGGATGAGAGCTTTTACTATCAGACTCCTGTGACTTGACTCGTTTCATTTACCCTCTGTCC-
TGTATCCAGCCCTGGATTTTTTGTTTTATATATGTTTGTTATATCACATACAGCACCTTGTCAAATCCTAAAATAGGGCA
TGGAGATAGCTCCTTTATATTTACTTTGCATATTCAGGAAAAAATGGTACCAGATCATTATGCAAGGTTTTCTTT----C
TTTCTTTTTTT---------------------------------------------------------------------
--------------------------------------------------------------------------------
--------------------------------TTTTTTTTTGAGATGGAGTTTCACTCTTGTTGCCCAGGCTGGAGTGCA
ATGGTGTGATCTTGGCTCACCGCAACCTCCGCCTCCTGGGTTCAGGCAATTCTCCTGTCTCAGCCTCCTGAGTAGCTGGG
ATTACAGGCACATGCCACCACGCCCAGATAATTTTTTGTATTTTTTT---AGTAGAGACGGGGTTTCACCATGTTGACCA
GGATGGTCTTGATCTCTTGACCTCATGATCCACCTGCCACGGCCTCCCAAAGTGCTGGGATTACAGGCTTGAGCCAC---
--------------------------------------------------------------------------------
--------------------------------------------------------------------------------
--------------------------------------------------------------------------------
--------------------------------TGCGCCCAGCCCCACAAGGTTTTCTTTAGATTTCCAAAAGCAGACTTG
AGCTTCAGGATGGTGACTTTGACTCTGGTGACAATAATTGATCTCTGCCTGTTCACACACTTTAGAAGCTCCCATGGAAA
AATGTAGT-------CCTTGTGTCTAAAGTTGCCAAACCACTTGGAAACATCAAGTTTCTTCCAAACACATAAAATTCTA
AGCGTCTTTAGTTAGGTAGTCATAACTTCTGCTTTGCCAAGTGTTTCTGTGTTTTAGAGAATCTGAAATCTCAGATGTGG
-CCATACCACTGGAGTTCAGGCTTTGAACTAGGGCATAGGCTCACAGGCTTTCCCTGCAGAACCCCGTATCACAGTCAGG
ATCTGCAGC-------TTGATTTGCCCAGAAACCCACATCTCCAGCCCTTCCCAGAAGATCCACTGAGATGCAGTGAGTT
TTCCACATATCACATACCGTTTCTCATGATAGCAAAGTCTTTTCCTATGCATTATTTCATCCAATTTTGTACTGTTTCCA
TTAGATATCAAAGGAGGGTTTAATTATTTCATTTTT--AAGGAAGAAACTG--CTTTCAAGAAATGAAGACCTTCTCCAG
GTCACACAGAGGATAAGAGGGAAAGTAGGCACGAACACGTTTCTTCTAGCTCCAGGGTCAGGCTCTTTCTTCTC-TCCTC
CTCAGACTCAGGAAGGAGGGTTCAACTGCATCAGTGATGTGAAGGAGATGAAACCAGTGGTGTGGGAGTGATGGACACAG
GATGAGAGATGTGGGGATCAAAAAATTTTTGTCATCCCTAGGAGTGAGATCTGGAGGCTGAGAAAGCCAAAAACTCTTTC
CCAGAAACTGAAGACTGTATTCCGTGCTCCAGATCTGAGTAGGATGCTGCAAATGTTTAGAGGTGAGGAGAAGCAGATAA
AGACTGTGAATGTGGGATTGTTGTGGTGTCAGGTAATAAACTGTCTAGGTGGGATGACTTAAAATTGAGGACAGAAGTGA
GGAAGGAGGTCAGAGAATAAGGAATATTCTGTGATAAAGAGGATGTGTTTATATGTAAAAGAAAATGGCTAAGTCTCTGG
TTTATCTTTT-AAATCACTAGCTCAAAGCTTCACGGTATTCCCTTCCCCTGTCCCTACTCTAAACAATAGGTAGGTATCA
GTGTTTACTCCTTTGTTTCTAATTAGCATCACTGAATCTTTTATTATTTCAGAACTGACAGCTGTCCGATGCTACTGGGG
TAAGAAAAAGTTTCAGTCTTTAAATAACTGTGTTCCAGTTACCTTTCAGAGGTTTGTGGTTTGTGGTTTCAATGATATCC
TCTAATCTTAGCCTCATTCGTTCTCAGCACCTCCCAAAACATTTGCATAATACATTTCTCCAGTGTTTTACTCC-TCCCA
TAATT-CATTAATGCACATTTTTCAGTCACTTCCCAAGTTCCTTCAT-----------AAGGTAAACTTACTCCAT-ATC
TGTCACCTAATCATATATATCACATAGATGATTATATTCATATACATATATA-TACA-----------------------
---------------TTTTTTTTCTTGCAGTGGATGTCACAATGAATCCAGTCAACCTAAATCTGAATCTTGTCCTTTCA
GAAGATCAGAGAGAAGTGACATCTGTGCCAATTTGGCCTTTTCAGTGTTATAATTTTGGTATCTTGGGATCCCAATGTTT
CTCCTCAGGGAAACATTACTGGGAAGTGGACGTGTCCAAGAAAACTGCCTGGATCCTGGGGGTATATTGTAGAACACATT
CCCGCAATAGAAAGTATGTCATTAGAAGATGTGCAAATCATCAAAATGTTTACTCCAAATATAGACCTCTATTTGGCTAC
TGGGTTGTAGGGTTACAGAATAAACGTAAGTACAGGGCCTTTGAGCAGTCTTCATCCTCTGATTCTGAGGTTTTGACTCT
CTCCATGGCTGTGCCTCCCTGCCGTGTTGGGGTTTTCCTAGACTATGAAGCAGGCATTGTCTCATTTTTCAATGTCACAA
GCCATGGCTCCCTCATTTACAAGTTCTCTAAATGCTGCTTTTCTCAGCCTGTTTATCCATATTTCAATCCTTGGAACTGT
CCAGCTCCCATGACTCTGTGCCCACCAAGCTCTTGAATTTTCTCATTTCTTCACCTACAACCCTTTGTCTTGACTCATCT
CCTGCATCTGACTCATCTGCAACATTCAGACCATTGCTACCTTGTGGTCCCCCTTCCTTTCTTTAGAACTTTCATTCATC
ATTGAGATGTACAGTATATTTGGCTTGAGTTATAAGAGATGCTTATTTATTCATTGACTCTTTTTCATATTTTCAGAGAA
AGTTACCTAGTCCCTCTTCAAGGCACAGCAGTATTGATATAACATCCTCGCCTTCTCATTTCTCTGTGTTTTGCTTTATC
ACTGATGTGAAGAGGCCCAGAGCCTGTTAGCCACCATCCATGCTACCTAGGTGGTTCATAGGAACCACCCC-ATGACCAC
CACCAACATCAACTAAAGGTTCTTGCAGAGTATGTCAGTGTGTTGCTCAGGATACCCCAGGTACATCAAGGAATCAAGGC
GTGAAAAATCTAATCAATATGTGTATTCAGAGAGAAGATTTTATGTCCAGAGTATTTGAGCTCAAACCCCGTCTCTTAAT
TTCTAATCATGTTGAATACTTTCTCATTTTGTT--ACCTGAAATACAAATTGTGATTTAAGCCTGCACCTGACATTTTGG
GCTGGATAAAAAAAGAA--------AAAAAAAGACTGAATCTAACTATTAAGATCATTGTGTAAAACTAGATGTCTCTAA
ATGTAATGCACCAATGTAGTGTCTGGAACATAA---ATATTTGCTCTCGTGATTA---AAAA
>Aotus_nancymaae_TRIM34
ACCCTGGCTTTTCTTCACCTCTTCTACCAGGACCCGAGATTTCTGTTGGCCTGAAGGTGTGTGGGGAGGTTTGT-GGGGG
GTAGAGGGTCTGAGACTCCAGGAGAAAAGATCTGAATGAAGTTAGGGGAATTTGATTTGTGGCCCCGAGGCTACCCTGCG
GTGTTGGGAGCAAAGGCTAGCTTGCAAGCTTCCTGCTTTGAGTGCACGCTGATCTGATCTCCGATCGCAGCCTAGAGTCT
GGGGAGGGACAGCCTTGAAAGGAGTGTTAAAGAGGCGGAAGGCCTCCTTTGTTTTCTGGAGTGACTTCTTTTTTTTTTT-
-CTCCAGGCTGAATCTGTTTCCATTTCCTTCCTATTCTATAGTCTTGATTTTCTACCTTGCAAAGGAAACTGAATTCTCT
CTCTCTC---TTTCTCT--------GTCTTAAAGAGATCAACAACAAAA-CAAAAA---CAAAA------------AAAG
AGATGAACAGAAGATCTCTTCTTTTCCACCCCCTTCTCTCTTCTCAAAAGAGAAGGTGGTGAGAGGAGGTCT--GTTTTC
CAAGCCTGTGCGGGCCTGAGCTCCTAGTATGCGGCTTTACATAGAATGGAACCAGA---GGGGCATGACCAGGGGAAATA
TTGAAGCACGTTCTTTCACTGCCCTCCTGGCAACCACTAAGGCGCTTTCTGCAACCATCCTCACATATCCTCAGTCCTTG
GCCTGCCAGACAACAGCAGCTTGAGTGATCTGACTGCTGCACACCACTCTGTTCCCTCTTACCCTGTGTCATTCTGCAGC
CGGTCTCAGGGCTCTCCTTGCTCGTCCCTGAACATACCTG----------------------------------------
--------------------------------------------------------------------------------
--------------------------------------------------------------------------------
--------------------------------------------------------------------------------
--------------------------------------------------------------------------------
--------------------------------------------------------------------------------
-----------------------------------------------------TTTACTTTTACTTCAGTAACCCACATG
CCTCCAGAGTCTTCACCTGTCTTAGAACTTGTTCCTCATCATTCTTCCTCTTAGACACACCTCTGCATTGATTTGTAACC
TCAATTTCTTA-CTGTTTTTCTTTGCTCAGAACTACTTAACAGAAGTTGTTTATTGTGGGCTCAGAAGGCACCCACAGAT
TTAATCTTCTT---------------------------------------------------------------------
---------------------------------------------------------------------------AAGAA
TTTGACATA-GGGTATGTCCTATCTTCAGCTCACTTGTGAGCAATTTG----TACCTTGATTGATATGTTACGGATATTC
TGACACTTGCCATTCTGACCTCTGCTCTCACCCTTCAGAGTTCACTGTAACTGCCTTTCTGTGTCTCTGCCTTACTCCTG
GGTAGAATCCATTTCTGCCTACATACTGACTGTCTCCCAGATGCATTTAGTCAGGCACAAGGCCCAA-CATATGGGGTAA
AATTGATTATAAAGCAGGCTGCTGGTGTGAAAATGTGCAATTAGCATCCATTCAACATTCAATAAATAAATATGAAATAT
ACATGGAGGTCTACATTTTAATTAGAAAGCAATCATAGACCATTTCAATAAATGATAGCGTACACAGGAAGATGACTAAT
ACTTTGGAGAAACATCTTT-------------------------------------------------------------
--------------------------------------------------------------------------------
--------------------------------------------------------------------------------
--------------------------------------------------------------------------------
------------AAGAAGTTAAATTGCTGGGCGCGGTGGCTCAAGCCTGTAATCCCAGCACTTTGGGAGGCCGAGGCGGG
TGGATCACGAGGTCAAGAGATCGAGACCATCCTGGTCAACATGGTGAAACCCCGTCTCTACTAATACAAAAAATTAGCTG
GGCATGGTGGCGTGTGCCTGTAATCCCAGCTATTCAGGAGGCTGAGGCAGGAGAATTGCCTGAACCCAGGAGGCGGAGGT
TGCGGTGAGCCGAGATCGCGCCATTGCACTCCAGCCTGGGTAACGAGCGAAACTCCGTCTCAAAAAAAAAAAAAAAAAAA
AAAAAGAAGTTAAATTAGGGTAAGGACTCTGTAAAGACCTCATAAAGTCCTTG---------------------------
--------------------------------------------------------------------------------
--------------------------------------------------------------------------------
---------------------------------------------------------------------TAGTTTTAAAT
AGTTTTTATGAAAGTTTTGAATAGATTTCATTGTAAGAAGAATACATTTGAATAGAATCTTAAGAAT---GTGAGGAAAT
TGAAGGCTCTAA-TGGTTTTTCCC-TGGGCTTAAAAGGAGAACAGTGTGGATATGGAAGATTGGAATGGAAGTGTGCAGA
GA--AGAATAAAAGTTGAGCTCTG--------------------------------------------------------
--------------------------------------------------------------------------------
--------------------------------------------------------------------------------
--------------------------------------------------------------------------------
---------------------------------AGGATTGAGGCAGTGGGAAGAGCTGTGTGATGTGGACCTAACTGGAC
CATTATGAAGTCTGGCTTCACTCTGGATGGCATGGTTTTGAACAGAAGAGTGACATGAT---TGACATCT-GCTTTAAGG
TGATCACTCTGTCTACTGTTGTAAGAACAGAGATGAGAGCAGAGTGAAGAAGAGCAATGATGGCCGGGTGCAGTAGCTCA
CGCCTATAATCCCAGCACTTTGGGAGGCTGAAGCAGGTGGATCACCCGAAGT----CAGGACTTTAAGACCAGCCTGGCC
AACATGGTGAAACCCCATCTCTACTAAAAATATAAAACTTAGCTGGGCATGATGGTGTGTACCTGTAATCCCAGTTACTT
GGGAGGCTGAGGC-AGAAAATCACTTGAATCCAGGAGGCCGAAGTTTCAGTGAGCCGAGATCGTGCCACTACACTCCAAC
CTAGGTAACAAGAGTGAAACTCCATCTCAAAAAAAAAAAAAAAA---GAAGAAGAGGAAGGGCAATGATAGGATCAGCAA
GACTAGTGGGAGAACAATTTCCTGAATTCAGGTGATTGCTATTGGAGTGGTGAGAGTTGAGGTGGTTGGAA-CTAATTTG
AAAACAA---------------CTCAGCATATTCTCATGAAGTAACAGACAGAAAAAGACAAGATTACGGGTTGATTAAT
AAAAATGATTCTGCGTTAAAAAGTAA--------------CTTTTTGGAAATCTATTGACCAGAATGTGTCAGCTCTTGG
GGAGAGAGTCATTATTGTGGTATAAATTGAGCCCTGGACTCTAAGGAATAGCTGAAGCAAGAACTCTGTGTATAGAGGAA
TGGGGAGGAGATGTTGCGATGTTTCTGAGATCTCCCGGCCTCTGAATGTCAAAACAGGCTCTACTTTTGTTATGGGCAGT
TTCTGACTAAGGAACTAGAAGAATTGTCTAGGATATTGTCTAGAAACTTGAAAAGACATCCTCCCC-TTAAAGTCACTCT
TAGCGACATTCTAATTTTACTGTCTAATCTGCAGAGAGACTTAAGAGTTTGCATTATCATATCCAGGTGTTAGGGATCCA
GATTTTAGGAGAAGACTCAAATGAAGGGTGCAGTCATCTGGCAGCTGTGGTAACCAGGCAACCTGGGAGTTCTGTTAGGC
CGAGGGCACTCATGTTCCCTTCTCTACCTCCCTGACGGCTGCTG---GGCTTGACCCCCATTGAGAAGTGGTGGAGTCAT
TTCTCACATGTGGGACCTTGGCTGCTCTGCACTTTTCTCATTCTTTTGCCACTATGGTGGCAGCAGCTTTGGCATCAACA
TGCAGCCTCACTGTGAACATGAAGTCACAGCCCATGGCAGAATGCATGTTCTACTACTTCCTCTCCTGGAGCTCCCTGGT
ATTTCTCACTATTGGCTGGATACGGATTGGAATAAAAGATAACAAAAAACTCCACATCTGTGGTTGGCTCATA-GTTTTA
GCCATAAACAAGGGTGAATATTATCATATCATGTAAACTCCTGGTCTTGCTAGTCATCAGAGCCTGGTCTGACTCATGGT
CATTGTAGCCAGGGG-CTACCACCATATCGCTTTTGTGTGACTTTTAGTATCTATACTGTTGGCTGGATTATACTCGCCA
GCTGATTTTCAGCCTTTTTTCCTCTTTAAGGTCTTTTGGTGGATTGTGAGAGGAGTAGACAGGTCTCAAGGCCTAGATTT
ATCTCCATACAGCTTT-CATCGTGCCCCACCCTTTTGCCAAGCGTGGGGAAGATTCCTAGGTTGTCACACTT-CACAGAT
CTTTCTTTC----ACTATCAAACCTTTTCAATTGTATTCGTTTCCTAGCACTGTTGCGATCAATTATCACCAACTAGATG
ACTTAAAACAATAGGGAT--------------------------TTTTGTCACAGCTCAGGAGTCCAGAAGTCCACAACC
AAGATAGTGACAAACTTGATTTTTT-----CAGAAGATTCTATGTGAGAATCGGTTCTATTCCTCACGCCTAGCTTCTGG
TGGTTTCTAGCCAACTCTGGCATTCTTTGGCTTATATCTGTGCTGCTCCCATCTCTGCCTCTATTGTCACATGGCTTTCT
TTCCTGTGTGTCTGTATGTCCTCTCCTCTTCTTATAAGAATACAGATC--------------------------------
--------------------------------------------------------------------------------
--------------------------------------------------------------------------------
--------------------------------------------------------------------------------
----------------------------------------ATTAAATTTAGGGCCTGTCTTTATCCAGTATGACCTCATC
TTAACTTGA------TTACATCTGCAAGGATGTGATTTACAAATAAGGTCACATTCACATAAGTGGACGTATTTTTGTGG
AGGGTATAATTCGGTCTACTAGAGCAAGTATCAAAATGTTACTGTCT----ACTGAGATCTACCCTTTTTCCCTTTGCTT
CACGGTTTCTTGTCTAAACCAACTTCAGGTTCTGAGAATTGGCATTGTATCACCATGCCACCACTCTGTGGTATTGCTCT
CTGACTGACCACAAGCAATAATTGTAGGTTTGTTTTGCTATTTGGACTCATGCAATTTAACTCTGCAGGGGGAATACAAG
GCAGGAGACACAGCATGCAGGCAGGCAGGGCCGCTTCAGGTGAGCTCTCAGTGAGGATTCTT------------------
--------------------------------------------------------------------------------
--------------------------------------------------------------------------------
--------------------------------------------------------------------------------
--------------------------------------------------------ATGGTGGTACAAGACCAAGTG---
-----GATGTGTGTGAAGCTAACATAGCTTAGGTAAACCTTACATCAACAGACTGATTCCCTTGTAAAGACCATGGGCAT
CGCTTCCAGGGCCCTACAGAGAATGTTTTGTTACAAGATTCTCAACCCTCTTGTGGAAGCTGGAGTCTATGCTTACCAAA
ACAAAACAAA---------TAAA-ATAAAATAATATACCAGGGGAAGGTGATGGCTGTGTCTTTTTTATAGATAGAAAGG
ACTT-AAGCCTAAAGATAACCTTTTTTTCCCC-TCATGTCTAGTCTGGCTTCCAGTCTTATTTCCTCTACCTCACTCTAT
TTCTCACCCTCATCTGCTTTTCTCTATTTCCTCTGTTAACTCGTCCTGCATCCTCCCATCCCTGCCCTCACTTCCTATTC
ATTGGAAAGAGACTAGCGCTTTCACTTCATTTAGGAAGTGTCACATATCCAGGTTCCTCCAGGTCCATGTGATGCCAAGG
GCTTAGGGCTTTTTGCATCCCAGCCACACATTCAAAAACTTTTGAAGATGGTATGATGGTTTGTCCTCCATGAAT----G
GG-CATTCACTTACATGATCCCTTCTACCTAAAATATTTTTTT-CTTTCTCATTCTGTATTCCTT-CTCATAATTCAGCT
TTCATTTAAACTCTTATTTATCCAAGCAAGATATCTTGGATAGTCCTCTATTTGGCAAATTATTTGATTTTCCAAAAACA
TGTACCTCTATATGATGGTGCTTTTT-ACACC-----------------TCCCATTTTACACTGTATGAATGATTATATG
ATTAGCTTCTGTCTTCTTTAGGTGATTATTTACTTTATTCTGGCTAATACCATCTGTTCAT-ACTCAACTTTGGATTTTA
ATCCATTTCCTGGATTTTAATTACTGAAGATAATGTGTCTTCAGTGAGAATTTCCTAAATAAACAAATGAATAATTGGCA
TTCAATTAGTGGATATGGATTTAACACAGACAGGA---CTTCATTGCTCCAAAATGTGGTTTCCCCTTATATGTTGGGAT
ATCTCTCCCATGACCAACAGCCATCTCGTTTGTATTTCTGTTCCTCAGTGATCTGATATTGGTATGAATCTGTGATCTAT
GTGTAACTCAGCTGGTTACATGCCCCCCCCCAACAAATACACACCTTTGGATTTCTAT-------TAAAACATGCTTTCA
GGCCAAGATAAAATCAATCACACCATCTACAAACACAAGACCCCCC-AGAAATTCCCAACTTACCTGGTTTCCTCTATTT
CTACACTC--ATAACACTGGATCTCAATCTACTTCTTTCAGGCTTTACCTCTGCTTTTCTTTGTTTAAATAAGTGGAGTA
GCATGAAGACCTCTGAAGGAGAACCCTGAGATGATTATATTCAATCCAATTCTACCTATTAAATTTAATGATCTTTGTAA
GTCATTTGATTTTATT----CATCTGAA-GAAAGGGAGTACTCTTACTT---TTTCTTTTCTGAGATGGAGTCTTGCTCT
GTCTCACCCAGGCTGGAGTACAGTGGCGTGATCTCAGCTCACTGCAGCCTCTGGCTCCCGGGTTGAAGCGATTCTCCTGT
CTCTGCCTCCCGAGTAGCTGGGATTACAGGCGCACGCCACATCACCCGGCTAATATTGTATTTTTAGTTTCACCATGTTG
ACTAGGCTGGTCTCAAACTCCTGACCTCAGGTGATCCACCCACCTTGGCCTCCCAAAGTGCTGGGATTACAGACGTGAGC
CAGAACACGCTGCCTCTGGAGTACTCTTATTTCTCAAGAAGTTTTGGAGGAGGAACAAATAGGCCAAAGTCATTTCTAAA
TTG-AACTGGTAATTAAATCTCCATATTGCAGTCATTGCTGTTTCTGTGGGTATCTCTGGGAAGTGTGTGAGCGTATGAG
AGGACTCTGTGTGGGGAGGTGTGTTAGAAGGTGAGCACTTCTTCACTGGAAACCACATCTGGGATTCCACAGTCCAGCTA
TTGAGGAATTTTCAAATAATGGAAT-AA-A-AAAAATGAAACACT-----------------------------------
--------------------------------------------------------------------------------
------------------------GATAAGAAGGTTTC---------------AGTCATCTATGG-AGAGAT-GGGAAAG
TTTTT-----AATATGTTTATCAAACATTGTACTTCACTGTGTTCTAAACACTGGGGCTATAGCAGTAAG----------
---AAAAAAACGAAAGTGCCAAATTTATGTGTGGATTATGTTTTAGAAAGAGGAGGCAGACATTTAAAGATAGATGGTGA
TAATA---------------------------------------------------------------------------
--------------------------------------------------------------------------------
--------------------------------------------------------------------------------
---------------------------------------------------------------------------AAAGA
C-GCAAATGTACACTGAATGATGAGTTTGTGGTGGTGCTATAGTT--GTTTGTCTTAGCAGACCCTTCTGATAAAGGGAC
ATGTCAGGA-AAAGTTGAAAAAAAA-GTGTAAACGGAAGTCATGCAAATAGCAACAGGAGGATAATTCTAGC------AA
CGAACAAGTGCAAAAGCCTTGAGGCGTTAACGGCTTGCCCAGACCACTTTCAGACATTTTTGGTTTCTCTTCCTCATCTT
TTTT-GTTTTTCGGTATTGCAGTCTCGGCCAGTCTTTGATGTGTGTGCACTTATAATGCTTTTTATTTGTACCATTCTTA
CACCATCCCCTTTCAATCTTCTCAGCCATCCAGGGGTCTTCAAGCAAGAAGAGAGAA-----CCTCAGGAGTTAGAACCA
GAAGAAGCCAGGGAAGCAGTGCAATGGCTTCAAAAATCTTGCTTAACCTGCAAGAGGAGGTGACCTGTCCCATCTGCCTG
AAACTTTTGACAGAACCCTTGAATCTAGGCTGTGGCCACAGCCTCTGCCAAGCCTGCATCACTGTGAACAACAAGGAGGC
AGTGACTAGCCCGGGAGGAAAAAACAGCTGTCCTGTGTGTGGTATCAGCTACTCATTTGAAAATCTACAGGCTAATCAGC
ATCTGGTCAGCATAGTGGAGAGACTCGGGGAGGTCACGTTGAGTCAAGACAATGGGAAGAAGAGAGATCTCTGCGATCGT
CATGGAGAGAAACTTCTACTCTTCTGTAAGGAGGATAGGAAAGTCATTTGCTGGCTTTGTGAACGGTCTCTGGAACACCG
TGGTCACCACACATTCCTCATGGAGGAAGTAGTCAAGGAATGTCAGGTAGGGCCCTAGATGGAGGGACACGGGGCAGAAG
ATGGTAACTGGTGGAA-GTCTCACCTTTCTATCCTTCTTT----------------------------------------
--------------------------------------------------------------------------------
--------------------------------------------------------------------------------
--------------------------------------------------------------------------------
--------------------------------------------------------------------------------
--------------------------------------------------------------------------------
------ACCCCTTGTGGCACCATAGTCCTGAGTCCCGTGATCTTCTCCATGTACATCTTTCACCCTGTGCTCAGCTTCCA
ATGCCTGGGGTACATTTCTGG-TATTCCTTTCATTTACATACCAGATGATCCTAGAGTACAGTCTCTTAGCCAAGAGTGA
AAGATTTTTGTTTT-----TTCCTTTTTCATTATATGAGTGATAAATTCCTTCCCAAAGTTAGCTTTCTTGCTTCTCTAA
GCAGGATAATTTCTGAGGAACATTGTGGGTTGAATGAGGAAAGAACATTGATAAGAGGAAAGGACTTTCCTTTTGGCAAG
ATAAATACT----CTCAGGAAAGAGAGAATCAGGCTACTCCTCTTGAAGGGGTAGTGACTTTCGTCACCAATGAATAAAC
AATACATTCATCTCTTCAAATTTTTCCCCATGTCATAGATTCTAATCACCAGCTTTCCAGTTACGGTAAATTGCTG-TTT
TCTCGCATCAACTTGATTTCTTTCCTCTTTGTTCTCTATCCAGATACTGAGAAAGCTTATAGCTTGACTCTAGTGTGATT
CCTTTCTCATAGGAGAAACTCCATGCAATCCTCAAGAGGCTGAGGAAGGAGGAGGAGGAAGCTGAGAAGCTAGAAGCTGA
CATCAGAGAAAAGAAAACTTCCTGGAAGGCAAGAGGAGATTCTGAAGGATTTCTGAGACAGGAATCTTGACAGGACCTTA
ATCCAAGGAGGCCTCATCCTTTTTGTTCCTTCACATTGCATGAGTCCTGCAGCCATTTGATTAGTTCTCTTCTCTGTCCT
GTCCCTGCTGGGGGTGGAGGCTGGACAGTGGACATGTTACAGTT-ACACACACATACCTAGCACTGAGCACAAAGATAGA
CCCTGTGATGAGAACGGCTAGCAAATA-----------------------------------------------CTGTGT
TCCATTGCTGTTTTCCAATGACGCTCTGCTACTTCTGGTGGAAA-CACTAGACTAAGGACTAAGGTTTTCCTCAAGATTC
AGATTAGGAGTATGGTAAGGCAGGCAGTCATGAATATCCAGGAAAGCTGTCTAGAAGCTAAGATTTATTATGTTTTACAT
TTT-TCTCAGGGTTGGCCTACATAAGACGGTTTGAGGTCATTGCTTTGGTAGGTACTGAAA--AAAATAGTAGGAAAAAA
TAGCTTCCCCC-AAATACTACTATTG------------------------------------------------------
--------------------------------------------------------------------------------
--------------------------------------------------------------------------------
--------------------------------------------------------------------------------
-----------CTTCCTTTCACTACCTTGCTGGTTTGAAC----------------------------------------
--------------------------------------------------------------------------------
---------------------TCCCTACTGGCTCCTAATCCCTTACACAATAGGCCCTCAGCCTGACAAACTTATTACAT
CTCTCTCTTGTCCATCCTTGCAGTATCAGGTACAAACTGAGAGACAAAGGATACAAACAGAATTTGATCAGCTTAGAAGA
ATCCTGAATAGTGAGGAGCAGAGAGAGCTGCAAAGATTGGAAGAAGAGGAAAAGAAGACGCTGGATAACTTGGCAGAGGC
TGGAGATGATCTAGTTCAGCAGAAGCAGTTGGTGAGAGAGCTCATCTCAGACGTGGAGTGTCGGAGTCAGTGGCCAACAG
TGGAGCTGCTGCAGGTAAGCAGGATCGCTCAATCTGGGATTCTGGAAACACAGTTTGTTACCTTTCCTTCTGTGTCCTGG
GGTTCTCATTCTGGTGGTGACACTAAGGGGTTTCTTTGGCCTTGCAGTGCCTGTTTATCATCCATTCTGGATGTCATGGA
TGTGAATGAATATGGGCATTCTAGGGCAATGTCGCATTGTTATTAATTTATGAAGTAAAGGAATACACTTAAACTCGCAG
AGAAGATCCATAATATCTAGTTATAGTCACTAGGCCCCTGTTATATGTGATCTAGTGACAGGCTTTTGTCAGACTTCTCT
TTACTCAGATTAGTCACAGGTAAACACATGATGCATTTTCAGGTTTAAGAGCAAACACATTTAAGAAATGTGTTCTATTT
AAATTTAAAGTATACTTATTTGTT--------------------------------------------------------
--------------------------------------------------------------------------------
--------------------------------------------------------------------------------
--------------------------------------------------------------------------------
---------------------------ATTGCGGATGTT-----------------------------------------
--------------------------------------------------------------------------------
--------------------------------------------------------------------------------
--------------------------------------------------------------------------------
------------------------------------CCCTGTTAGTTCTTTTTAAACATGAAGTGATGGGATATTGAGCT
TTTTGGTGAGAAACATGGACAAACATCTGGACAGACAGTGCTTCCCTTTCTTTGATAAATTTCTAAATATTTCCTTTTTA
AGTTTTGGTATGAAGCAGGGGAGTAACTGATTTTCATTTGTTGAATTGTTTCCTTTGTCTCTGGTGCTTATATACCAGAT
TTCTTTT-CTTCTTGTTTCCTTTTGTCTTCTTCTTTTTGTTTAAATTTAAGATTACTCTGGAACAGAGGTTCCTAAACAT
ATTTTGCACTCATTAGGATGGCTATAATCAAAGAA-GATGGACAATACCAAGTACTGGGGAAGATGTGAAGAAACTGAAA
CCTTCTTGAATTGCTAGTAGACATGTAAAATA--GCAAAGCTGCTTAG-AAAAACTGCTTGGCTGTTGCTCAGAAACTTA
AAGGGAGTTCTCA-TGTGGCCTAGCCAT-CCATTCCTACATATATACCTAGAAGAACTGAATACATATATCTGTGCATAA
ACTTATATATGAAAGTCCACAGCAGTATTGTTCAAAAATAAAAACAACTCAAATCTCCTTAA-CTAAGGAATGGATAAGG
AAAATGTGTTATATTCAAACAATGTAATATTGTTTAGCTATGAAAAATAATCAAGTAATAATGCATGCT--GACATGGAT
GCACCTTGAAAACATCATGGTAATTGAAAGACGGCAGACACAAAGTTCTTTTT-CCATGATTCCATTTATATGAA-----
-----AGTCTATACGTAGCAAATCCATAATACAGAAATTGGATTAGTGGTTGTCAGGGCTCTGGGGAAGAATAAATAGGA
AGTAATTGCTAATTAGTGCACAGTTTCTATTTGTAGTGATGAAAATGATCTGGA-TTTTCTATGCAATGATGGTTGCACA
ATATTGTGACTATATTAAAACCTGTTA-----------------------------------------------------
--------------------------------------------------------------------------------
--------------------------------------------------------------------------------
--------------------------------------------------------------------------------
------AATTATGCACTGTAAAATGCAAATTTT-ATGGTATTTGAACTACATTTCAGTAAAAACAAAAACAAAAAGTTTC
CGTAGGCCCTTTTTTATAGTTCTTCCATGAGCTCTTCACAACCCTTTGAATAGCCACCATCACAAGAGAACACTGTGTTT
ATGTCATTTGTCCAGGCATTTGTCCTATTTAAGTCAGTCTTAGTTGCTAT-TTGGTCACTTGGAATTTAAAAAAATATTG
GAATATCAAAAATTATAAATGCTGTAGGATTAACATTTCACATCTAGATGTTAACTTCAAAGAATGGCAAATGGA-----
--------------------------------------------------------------------------------
--------------------------------------------------------------------------------
--------------------------------------------------------------------------------
--------------------------------------------------------------------------------
--------------------------------------------------------------------------------
--------------------------------------------------------------------------------
--------------------------------------------------------------------------------
--------------------------------------------------------------------------------
--------------------------------------------------------------------------------
--------------------------------------------------------------------------------
--------------------------------------------------------------------------------
--------------------------------------------------------------------------------
--------------------------------------------------------------------------------
--------------------------------------------------------------------------------
--------------------------------------------------------------------------------
--------------------------------------------------------------------------------
--------------------------------------------------------------------------------
--------------------------------------------------------------------------------
--------------------------------------------------------------------------------
--------------------------------------------------------------------------------
--------------------------------------------------------------------------------
--------------------------------------------------------------------------------
--------------------------------------------------------------------------------
--------------------------------------------------------------------------------
--------------------------------------------------------------------------------
--------------------------------------------------------------------------------
--------------------------------------------------------------------------------
--------------------------------------------------------------------------------
--------------------------------------------------------------------------------
--------------------------------------------------------------------------------
--------------------------------------------------------------------------------
--------------------------------------------------------------------------------
--------------------------------------------------------------------------------
--------------------------------------------------------------------------------
--------------------------------------------------------------------------------
--------------------------------------------------------------------------------
--------------------------------------------------------------------------------
--------------------------------------------------------------------------------
--------------------------------------------------------------------------------
--------------------------------------------------------------------------------
--------------------------------------------------------------------------------
--------------------------------------------------------------------------------
--------------------------------------------------------------------------------
--------------------------------------------------------------------------------
--------------------------------------------------------------------------------
--------------------------------------------------------------------------------
--------------------------------------------------------------------------------
--------------------------------------------------------------------------------
--------------------------------------------------------------------------------
--------------------------------------------------------------------------------
--------------------------------------------------------------------------------
--------------------------------------------------------------------------------
--------------------------------------------------------------------------------
--------------------------------------------------------------------------------
--------------------------------------------------------------------------------
--------------------------------------------------------------------------------
--------------------------------------------------------------------------------
--------------------------------------------------------------------------------
--------------------------------------------------------------------------------
--------------------------------------------------------------------------------
--------------------------------------------------------------------------------
---------------------------------------------------------TTTTTTTT-AATGTTGAACCAAC
CTTGCATTTCTGGGATATGTCCTACTTGGGCATTAGTTATAATCTTTTTGCTAGCTTGCTGGATTTGATTTTCTTGTATT
TTTGTTGGAGAATTTTGTATTTATATTC------GATAGTGGCCTATGTTTTTCTTTTCTTGTGATGTCTTCAGTTCTTT
AATCAGGGTTATTTTATCAGGGTAGGATAAGTCTCATGTAATGAATTAGGAAGTGTTTCCTGCTCTTCTTTATTTTTGAA
ATAGTTTATGAAGTTTTGATATTACTTCTTTGTAAACCTTTAGCAGAATTCACCAGTGAAGCCATCTGGGTAAGATCTTT
CCTCTGTAGGAAGTCTTTGATTTCCAACTTAATCTCTTAACATGTTTTAGGCCTATTCATATTTTCTATGTGTTCTTTAA
TCAGTATTGATAGTTTCTATATTTCTAGGAATTTGTTTATTTCATTTAGATTATCGAATTTGTTAACATAGAGTTGTTCA
TCATTTTTATAATCCTTTTAATTTCTGTAAGGTCAATGGCAATATCTCATCTTTCATTCCCGATTTCTTTTT-CTTGGTA
TGTCTAGCTAAATGTTTGCTAATTTTGTTGACATTTTCATATAACTCACTCCTGATTTTTCCATTTTTTT---CTATTGT
TCTTCTTTCTTTCATTAGTCTTATGCTAGTCTTTATA-ACTTTGACTCATGTTTTCTCTTTTCTTTCTAGGACATGAGTG
GAATCATGAAATGGTGAGTATGGATGGTCAAGAGTGGTGCTTGTGAGTTATAAAGAAGTGTTTGTAACTATGAG------
---GTAGTCAATCAGAATAAAAAAATCTCCCAGAGTAGTATAATTTGGATGTAGTATTGTCTTAAATTGCTGGTCCCAGA
TGAAGATTTGAGTTTTCCATAACTATGAAGAATGGATTCAATCCTATAGTAGTAAATTCAGTGGTTGAAGTTCAGAGCTA
GAGCCAGAAAGGATATTAAGGATGAGAGCTTTTACTATCAGACTCCTGTGACTTGACTCGTTTCATTCATCCTCTGTCC-
TGTATCCAGCCCTGGATTTTTTGTTTTATATATGTTTGTCATATCACATGGAGCACCTTGTCAAATCCTAAAATAGGGCA
CGGAGATAGCTCCTTTATATTTACTTTGCTTACTCAGGAAAAGACGGTACCAGATCATTATGCAAGGTTTTCTTT-----
--------------------------------------------------------------------------------
--------------------------------------------------------------------------------
--------------------------------------------------------------------------------
--------------------------------------------------------------------------------
--------------------------------------------------------------------------------
--------------------------------------------------------------------------------
--------------------------------------------------------------------------------
--------------------------------------------------------------------------------
--------------------------------------------------------------------------------
-----------------------------------------------------------AGATTTCCAAAAGCCGACTCG
AGCCTCAGGATGGTGACTTTGACTCTGGTGACAATAATTGATCTCTTCCTGTTCACATACTTTAGAAGCTTCCATGGAAA
AATGTAGT-------CCTTGTGTCTAAAGTTGCCAACCCACTTGGAAACATCAAGTTTCTTACAAACACATAAAATTCTA
AGCATTTTTAGTTAGGTAGTCATAACTTCTCCTTTGCCAAGTGTTTCTGTATCCTAGAGAATCTGAAATCTCAAATGTGG
-CCATACCACTGGAGTTCAGGCTTTGAACTAGGGCACAGGCTCACAGGCTTTCCCTGCAGAACCCCATATCACAGTCAGG
ATCTGCAGCGTCACTCTTGATTTGCCCAGAAACCCACATCTCCGGCCCCTCCCAGAAGATCCACTGAGATGCAGTGAGTT
TTCCACATATCACATACCATTTCTAAAGGTAGCAAAGTCTTTTCGTATGCATTATTTTATCCAATTTTGTACTGTTACCA
TTAGATATCAAAGGAGGGTTTAATTATTTCATTTTT--AAGGAAGAAACTG--CTTTCAAGAAATGAAGACCTTCTCCAG
GTCACACAGAGGATAAGAGGGAAAGTAGGCACGAACACGTTTCTTCTAGCTCTGGGGTCAGGCTCTTTCTTCTC-TCCTC
CTCAGACTCAGGAAGGAGGGTTCAAGTGCATCATTGATGTAAAGGAGATGCAACCAGTGGTGTGGGAGTGATGGACACAG
GATGAGAGATGTGGGGGTCAAAAAATTTTTGTCATCCCTAGGAGTGAGATCTGGAGGCTGAGAAAGCCAAAAACTCCTTC
CCAGAAACTGAAGACTGTATTCCATGCTCCAGATCTGAGTAGGATGCTGCAAATGTTTAGAGGTGAGGAGAAGCAGATAA
AGACTGTGGATGTGGGATTGTTGTGGTGTCAGGTAATAAACTGTCTAGGTGGGATGACTTAAAATTGA--ACAGAAGAGA
GGAAAGAGGTCAGAGAATAAGGAATATTCTGTGATAAAGAGGATGTGTTTAGATGTAAAAGAACATGGCGAGGTCTCTGG
TTTATCTTTT-AATTCACTAGCTCGAAGCTTCACGGTATTCCCTTCCCCTGTCCCTACTCTAAACAATAGGTAGGTATCA
GCGCTTACTCCTTTGTTTCTAATCAGCATCACTGAATCTTTTATTATTTCAGAACTGACAGCTGTCCGATGCTACTGGGG
TAAGAAAAAGTTTCAGTCTTTAAATAGCTGTGTTCCAGTTACCTTTCAGAAGTTTGTGGTTTGTGGTTTCAATGATATCC
TCTAATCTTAGCCTCATTCGTTCTCAGCACCTCCCAAAACATTTGCATAATATATTTCTCCAGTGTTTTACTCC-TCCCA
TAATT-CA---ATGCACGTTTTTCAGTCACTTCCCGAGTTCCTTCAT-----------AAGATAAACTTACTCCATTATC
TGTCACCTAATCATATATATCACATAGATGATTATATTCATATACATATATA-TATA-----------------------
-TTTTTTTTTTTTTTTTATTTTTCTTGCAGTGGATGTCACAATGAATCCAGTCAACCTAAATTTGAATCTTGTCCTTTCG
GAAGATCAGAGACAAGTGATACCTGTGCCAATTTGGCCTTTTCAGTGTTATAATTTTGGTATCTTGGGATCCCAGTGCTT
CTCCTCAGGGAAACATTACTGGGAAGTGGACGTGTCCAAGAAAACTGCCTGGATCCTGGGGGTATATTGTAGAACACATT
CCCTCAATAGAAAGTATGTCATTAGAAGATGTGCAAATCGTCAAAATGTTTACTCCAAATATAGACCTCTATTTGGCTAC
TGGGTTATAGGGTTACAGAATCAATGTAAGTATAGGGCCTTTGAGCAGTCTTTGTCCTCTGATTCTGAGGTTTTGACTCT
CTCCATGGCTGTGCCTCCCTGCCGTGTTGGGGTTTTCCTAGACTATGAAGCAGGCATTGTCTCATTTTTTAATGTCACAA
GCCATGGCTCCCTCATTTACAAGTACTCTAAATGTTGCTTTTCTCAACCTGTTTATCCATATTTCAATCCTTGGAACTGT
CCAGCTCCCATGACTCTGTGCCCACCAAGCTCTTGAATTTTCTCATTTCTTCACCTACAACCCTTTGTCTTGACTCATCT
CCTGCATCTGACTCATCTGCAACATTCAGACCATTGCTTCCTTGTGGTCTCCCTTCCTTACTTTAGAACTTTCACTCATC
CTTGAGATGTACAGTGTATTTGGCTTGAGTTATGAGAGATGCTTATTTATTCATTGACTCTTTTTCATATTTTCAGAGAA
AGTTACCTAATCCCTCTTAAAGGCACAGCAGTATTGATATAACATCCTTGCCTTCTCATTTCTCTGTGTTTTGCTTTATC
ACTGATGTGAAGAGGCCCAGAGCCTGTTAGCCACCATCCATGCTACCTTGGTGGTTCGTAGGAACCACCCC-ATGACCAC
CATCACCACCAACTAAAGGTTCTTGCAGAGTATGTCGGTGTGTTGCTCAGGATGCCCCAGCTGCATCAAGGAATCAAGGA
GAGAAAAATCTAATCAATATGTGTATTCAGAGAGAAGATTTTATGTCCAGAGTATTTGAGCTCAAACCCCGTCTCTTGTT
TTCTAATCATGTTGAATACTTTCTCATTTTTTT--ACCTGAAATACAAATTGTGATTTAAGCCTGCACCTGACATTTTGG
GCTGGAT------------------AAAAAAAGACTGAACCTAACTATTAAGATCATTGTGTAAAACTAGATGTCTCTAA
ATGTAATGCACCAATTTAGTGTCTGGAACATAATAAATATTTGCTCTCATGATTACTAAAAA
