# Supplementary material for: Elevated Rate of Fixation of Endogenous Retroviral Elements in Haplorhini TRIM5 and TRIM22 Genomic Sequences: Impact on Transcriptional Regulation
Source: PLoS One. 2013 Mar 14;8(3):e58532. doi: 10.1371/journal.pone.0058532 (PMC3597737; doi:10.1371/journal.pone.0058532)
Supplement: File S4 — Fasta formatted nucleotide alignment of primate genomic TRIM5 sequences. (FASTA) [file pone.0058532.s009.fasta]

>Homo_sapiens_TRIM5
GCGGTTCCTCT-AGGAAAATTCCTTTGTGCAGATCAGG-CCCGTGGATTGGTGAGTGAATCCTAACCACGTCTT----CC
CTGGCCTGTCTTCACTCTTCTCCCCAGAATCACCACTTCTGCACTGGTGTCTGAAGGTGTATTGAGTGATTTTGTGGAGG
GCAGAAGTAGGAAGTCTTTGGGACAAAACTGTATTTACCTTGGTGAGTTTAACTTATCTGAAAAGCTGTGCGGGGGTGGG
GAAAAGACACAGTTCACAGACTTCTTGCTGCCAGAGCTGACTGAGGGGAACAGAGCCGCCTGGCGGGCAGGCAGATTTGA
AAGAAGGGAGAGCTTT----------------------------------------------------------------
--------------------------------------------------------------------------------
--------------------------------------------------------------------------------
--------------------------------------------------------------------------------
----------------------------------AAAGTGAAGGGCTTTGTTTCC-CGAAGGCTGGTTATTTTTCCATGC
TGACTCTCTCCCCATCCCCTCCCTACTCTATACTTTTTAATTGAACTTTGCTGTAGAGAGCCAGAATTCTCTCTTTCAGT
GTCTTCTCCCAACAACAAGGGCAAAGACAGGGGCCTTGGAATCCTAATGATTTAATGCCTATTAGTTTACTAATGTAGTG
TTTCTGCATAACTCTACAGGTCAGTTCTCATCACCTTGGCCTGGCTCTGTGACATCAGCCTTCATGGTGTGACAGCTGTC
CAGTTCTGTAGTCCTGTCATTGTCACTG-TAAATGGAGTTCTTTCCCTAGTTCATATTGGTTACAAAGATAATGGGAAAA
AA-GGCAAGCAGGTTTTATTTCTTGCTAGGAGTGGAGAGTAAGAGAGCTCCTTCTCTAAAGCCCCCTCCCCCAAAACAGT
GGAAAGCA-TTGGCTTTAAAAGAACTGAGTACGGGGAGAGAAAGGAGTGTTAGCCTATAGGGTGGAACTCCAGTTGTGCC
ACCTCTGTTTATAAACACATGTCTTCATACTGTGTCCGGAATTGGTGGGTTCTTGGTCTCACTGACTTCAAGAATGAAGC
CGCGGACGCTTGCAGTGAGTGTTACAGTTCTTAAAGGCGGCATGTCCGGAGTTTCTTCCTTCTGATGTTCGGATGTGTTC
AGAGTTTCTTCTTTCTGGTGGGTTCGTGGTCTCGCTGGCTCAGGAGGGAAGCTGCAGACCTTCGCGGTGAGTGTTACAGC
TCATAAAGGCAGTGTGGACCCAAAGAGTGAGCAGTATTAAGATTTATTGCAAAGAGGAAAATAACAAAGCGTCCATAGTG
TGGAAGGGGACCAGCGCAGGTTGCCACTGCTGGCTCAGGCAGCCTGCTTTTATTCTCTTATCTGGCCCCACCCACATCCT
CCTGATTGGTCCATTTTACAGAGAGCCGAGTGGTCTGTTTTGACAGGGCACTGATTGGTGCATTTACAATCCCTGAGCTA
GACACAAAAGTTCTCCA-GTCCCCACTAGATTAGCTAGATACAGAGTGTAGACACAAAGATTCTCCACATCCCCACCAGA
GTAGCTAGATACAGAGTGTCGATTGGTGCATTCACAAACCCCGAGCTAGACACAGGGTGCTGATTGGTGTGTTTACAAAC
CTTGAGCTAGATACAGA-----GTGCCGATTGGTGTATTTACAATCCCTTCGCTAGACATAAAGTTTCTCCAAGTCCCCA
CCAGAGTAGCTAGATATAGAGTGTCGATTGGTGCATTCACAAACCCTGAGCTAGACACAGGGTGCTGATTGGTGCATTTA
CAATCCCTTAGCTAAACATAAAGGTTCTGCAAGTCCCCACCAGACTCAGGAACCCCACTGGCTTCACGCAGTGGATCCTG
CACCGGG-CCGCAGGTGGAGCTGCCTGCCAGTCCTGTGCCATGCCACGCACCTGCACTCCTCAGCCCTTGGGTGGT-GAT
GGGACTGGGCGCCGTGGAGCAGGGGGCGGTGCTCGTCAGGGACGCTCGCGCAGCACAGGAGCCCAAGGGGTCGTGGGGAG
GCTCAGGCATGGTGGGCTGCAGGTCCTGAGCTCTGCCCCGCGGGGAGGCAGCTAAGGCCCGGCGAGAAATTGAGCACAGC
AGCTGCTGGCCCAGGTGCTAAGCCGCTCACTGCCCGGGGCAGCGGGGCCGGCCGGCCACTCCGAGTGCGGGGCCCACCAA
GCCCACGCCCACCCGGAACTCCAGCTGGCCCACAAGCGCGGCGCGCAGCCCCGGTTCCCGCTCGCCCCTCTCCCTCCACA
CCTCCCTGCAAGCTGAGGGAGCCAGCTCCGGCCTTGGCCAGCCCAGAAAGGGGCTCCCACAGTGCAGCGGTGGGCTGAAG
AGCTCCTCAAGTGCCGCCAAAGTGGGAGCCCAGGCAGAGGAGGCGCCAAGAGCGAGTGAGGGCTGCAAGGACTGCCAGCA
TGCTGTCACCTCTCAATACAACCCAGGCACACAAAATGGTGGAGATTTTCTTGTTTGGTGTCGTGTGGGGGAGGGGGTAA
CTTAACACTCTAGTGATATGTTAATGATCTAAAGGCAATTAGGGATTGTCAGTTCCAGTATATACGCTGGTTCGGGGGTC
TAATTTCCCCCTTGGATCTGGTCAGGGGTCAAGATCTGGACCATGCTGGGCAGTCTGGCTTCTTCTTAAGCAACTTTGTC
TATACATAAAGGGAATAAAGAAAAACGTTAAGAAAAATAACTTTCCCAGTCATTTCATCAGGGCTTCCCTGGTGACAGCA
TCTGTTTGCCTCTACTAGGGCACCAAGTCCAGACTCAGGGAACTACTGGATTTTCTTAAAAATCATTAACCTTGCTCCTC
CCTCTCCGTGGGCCGTATCTGCCCCCCAAAAGCAGAGCTTAG--GTGAGATACGAAGAGCAGGAGAAGCATGTGGAAAGA
ATACCCA-------------------------------------------------------------------------
--------------------------------------------------------------------------------
--------------------------------------------------------------------------------
--------------------------------------------------------------------------------
--------------------------------------------------------------------------------
--------------------------------------------------------------------------------
--------------------------------------------------------------------------------
--------------------------------------------------------------------------------
--------------------------------------------------------------------------------
--------------------------------------------------------------------------------
--------------------------------------------------------------------------------
--------------------------------------------------------------------------------
--------------------------------------------------------------------------------
--------------------------------------------------------------------------------
--------------------------------------------------------------------------------
--------------------------------------------------------------------------------
--------------------------------------------------------------------------------
--------------------------------------------------------------------------------
--------------------------------------------------------------------------------
--------------------------------------------------------------------------------
--------------------------------------------------------------------------------
--------------------------------------------------------------------------------
--------------------------------------------------------------------------------
--------------------------------------------------------------------------------
--------------------------------------------------------------------------------
--------------------------------------------------------------------------------
--------------------------------------------------------------------------------
--------------------------------------------------------------------------------
--------------------------------------------------------------------------------
--------------------------------------------------------------------------------
--------------------------------------------------------------------------------
--------------------------------------------------------------------------------
--------------------------------------------------------------------------------
--------------------------------------------------------------------------------
--------------------------------------------------------------------------------
--------------------------------------------------------------------------------
--------------------------------------------------------------------------------
--------------------------------------------------------------------------------
--------------------------------------------------------------------------------
--------------------------------------------------------------------------------
--------------------------------------------------------------------------------
--------------------------------------------------------------------------------
--------------------------------------------------------------------------------
--------------------------------------------------------------------------------
--------------------------------------------------------------------------------
--------------------------------------------------------------------------------
--------------------------------------------------------------------------------
--------------------------------------------------------------------------------
--------------------------------------------------------------------------------
--------------------------------------------------------------------------------
--------------------------------------------------------------------------------
--------------------------------------------------------------------------------
--------------------------------------------------------------------------------
--------------------------------------------------------------------------------
--------------------------------------------------------------------------------
--------------------------------------------------------------------------------
--------------------------------------------------------------------------------
--------------------------------------------------------------------------------
--------------------------------------------------------------------------------
--------------------------------------------------------------------------------
--------------------------------------------------------------------------------
--------------------------------------------------------------------------------
--------------------------------------------------------------------------------
--------------------------------------------------------------------------------
--------------------------------------------------------------------------------
--------------------------------------------------------------------------------
--------------------------------------------------------------------------------
--------------------------------------------------------------------------------
--------------------------------------------------------------------------------
--------------------------------------------------------------------------------
--------------------------------------------------------------------------------
--------------------------------------------------------------------------------
--------------------------------------------------------------------------------
--------------------------------------------------------------------------------
--------------------------------------------------------------------------------
--------------------------------------------------------------------------------
--------------------------------------------------------------------------------
--------------------------------------------------------------------------------
--------------------------------------------------------------------------------
--------------------------------------------------------------------------------
--------------------------------------------------------------------------------
--------------------------------------------------------------------------------
--------------------------------------------------------------------------------
--------------------------------------------------------------------------------
--------------------------------------------------------------------------------
--------------------------------------------------------------------------------
--------------------------------------------------------------------------------
--------------------------------------------------------------------------------
--------------------------------------------------------------------------------
--------------------------------------------------------------------------------
--------------------------------------------------------------------------------
--------------------------------------------------------------------------------
--------------------------------------------------------------------------------
--------------------------------------------------------------------------------
--------------------------------------------------------------------------------
--------------------------------------------------------------------------------
--------------------------------------------------------------------------------
--------------------------------------------------------------------------------
--------------------------------------------------------------------------------
--------------------------------------------------------------------------------
--------------------------------------------------------------------------------
--------------------------------------------------------------------------------
--------------------------------------------------------------------------------
--------------------------------------------------------------------------------
--------------------------------------------------------------------------------
--------------------------------------------------------------------------------
--------------------------------------------------------------------------------
--------------------------------------------------------------------------------
--------------------------------------------------------------------------------
--------------------------------------------------------------------------------
--------------------------------------------------------------------------------
--------------------------------------------------------------------------------
--------------------------------------------------------------------------------
--------------------------------------------------------------------------------
--------------------------------------------------------------------------------
--------------------------------------------------------------------------------
--------------------------------------------------------------------------------
--------------------------------------------------------------------------------
--------------------------------------------------------------------------------
--------------------------------------------------------------------------------
--------------------------------------------------------------------------------
--------------------------------------------------------------------------------
--------------------------------------------------------------------------------
--------------------------------------------------------------------------------
--------------------------------------------------------------------------------
--------------------------------------------------------------------------------
--------------------------------------------------------------------------------
--------------------------------------------------------------------------------
--------------------------------------------------------------------------------
--------------------------------------------------------------------------------
--------------------------------------------------------------------------------
--------------------------------------------------------------------------------
--------------------------------------------------------------------------------
--------------------------------------------------------------------------------
--------------------------------------------------------------------------------
--------------------------------------------------------------------------------
--------------------------------------------------------------------------------
--------------------------------------------------------------------------------
--------------------------------------------------------------------------------
--------------------------------------------------------------------------------
--------------------------------------------------------------------------------
--------------------------------------------------------------------------------
--------------------------------------------------------------------------------
--------------------------------------------------------------------------------
--------------------------------------------------------------------------------
--------------------------------------------------------------------------------
--------------------------------------------------------------------------------
--------------------------------------------------------------------------------
--------------------------------------------------------------------------------
--------------------------------------------------------------------------------
--------------------------------------------------------------------------------
--------------------------------------------------------------------------------
--------------------------------------------------------------------------------
--------------------------------------------------------------------------------
--------------------------------------------------------------------------------
-------------AGTAGCTGGGATTACAGGCACCTGTCACCAAGCTCAGCTCATTTT-GTATTTTTAGTAGAGACAGAA
TTTCACCATGTTGGCCAGGCTGGTCTTGAACTCCCAGCCTCAGGTGATCCGCCTGCCTTGGCCTCCCAAAGTACTAGGAT
TACAAGCGTGAGCCACCACACCCGTCTGGTTAAGTTAAATATTAAAAGCTGAAGCCGGGCACGGTGGCTCACGCCTGTAA
TCCCAGCACTTTAGGAGGCCGAGGCAGGTGGATCACAAGGTCAGGAGTTGGAGACCAGACTGGCCAATATGGTGAAACCC
CATCTGTACCAAAAA--TACAAAAATTAGCCGGGTGTGGTGGTGCGTGCCTGTGGTCCCAGCTGCTCGGGAGGCTGGGGC
AGAGGAGTCACTGGAACCTGGGAGGCAGAGGTTGTGGTGAGCCGAGATTGTGCCATTGCACTCCAGCCTGGGCGACAGAG
CAAGACTCCGTCTCAAAAAA---GAAAAAAAAATATTAAAAGCTGATAGAGCCAGTGCCCTTATACAAAGGCTGGAATGT
AACAGAAGCCCACTGAGAGTTTTGCCCAGGCCTTTCCTGGGCCTTGAAGCATGACAAGATAACGAAGGAATCGATT--AG
GACCTGTTTAGGATTAAACAAGTTTTAT-GGGGGTCTGAAGGAACTCCC-AGGCCTCCACAAACAAGTTTATTGAGGGTC
TGAAGGAACTCCGCAAACCTTAATGATTTAGCAGGAGAGACAAGATAAGGGTAATCACCCCAGCACCCGGACCCATCTAG
ATTAGGTAAATTTACTGAGGCACCAGAGGAAGGTCTT-AAAACTCAGACCTTAGTTATAGATTTGAAGAAG---TTA-AT
CACTTATGTTTTTAGATGAATAATGCACACCTATACGTAGACGTATAGCTTAGAAGGTATATAAGCTCTGGAAAACTTTG
TAATTTTGAGTTGGTCTGGAGATATTTTCTAGGCCTTCTCCCTGTACG------CAGAAATAAAAATTCGCTTCTTTCCC
AGTAAATCTGCATCTCGTTATTGGGCCGCAAGAAGCAGCAGCC-GACCCTCCGTTTGTTCCGGGAACAGAATCATCTCAT
CTAATATTTTGAGACTTCTCTCTCAAGACTGATATCCACTGCCTCTGTGCTTCTAGTTTTCAAGTATCCAACATGTGTGG
TCCACTGAGTATTTCTCTATCATCACCCTCTACACCATGT----------CTACACCTTTAGGCTCCAATAAATGTCCTT
GGCAAACTTTCAGGATGAGACTCCTCAGAACCTCCCAGCTGTTGTGGATTCCTCTACTTCCACACCCCAATTGCTCTGGG
TATTAATTGGATATATGCTGTTATCTCCATTTGTCATTGATTAACCAAAAGAGTAGCAAAGAGGCCAGTGAAAGAGGACC
CTGAATACGAGGTCATCTCAGGTCACCATACTGAAGATAAATAATTTTTGTAAATCACTTATTATGTCTATTTATACATT
TGATGAAACA--GTCATTCACTC--TGCTGATAATAAGAGCAATCATTGCAAACGTACAGTGCATGGTGAGATTTGTTAC
ACTGCACATAAGGTAGTCAGAGCAGGTATTTTTGATAATATAACATGTAAGGAGAGAATTTAATAAAATCGTACTAACAT
CAGAGAAACATTTCATGCTGAGAGAAGAGCAAATGTGAAAGCCCTGAGGCATAAGCTGTTTGGTGATTTTAATACTGAGG
ATGTGTTTTGGCGTGGGAAAGAAAAGCCAGGAGAGATGATGGGTCACACAAAGATCTTGGTAGAAAAGACCTCAGTCTGT
TTTCTATTCATTGAAAGTAAAGAAAAATGATAACCAATGCACAGATAAGAACAGAATTTGTCATATGACATGAACTGGCA
GTAAAGTATTTAAGGTGATTATGAAAAGCCCTTATTACCAGGTAACCAAACACCTTTTCTTATTT-CTCCCC-TTTTTTT
---GTCCTTAATTATTTTCATCTTGCCCATTTTCTAATTGTGCACAATCAATATCCTTTCTATTT---CTACCTTTCTTA
CTTGGTCCCATTTTAACCTTCCCAATCATGCAGGGATCTGTGAACAAGAGGAACCTCAGCAGCCAGGACAGGCAGGAGCA
GTGGAATAGCTACTATGGCTTCTGGAATCCTGGTTAATGTAAAGGAGGAGGTGACCTGCCCCATCTGCCTGGAACTCCTG
ACACAACCCCTGAGCCTGGACTGCGGCCACAGCTTCTGCCAAGCATGCCTCACTGCAAACCACAAGAAGTCCATGCTAGA
CAAAG---GAGAGAGTAGCTGCCCTGTGTGCCGGATCAGTTACCAGCCTGAGAACATACGGCCTAATCGGCATGTAGCCA
ACATAGTGGAGAAGCTCAGGGAGGTCAAGTTGAGCCCAGAGG---GGCAGAAAGTTGATCATTGTGCACGCCATGGAGAG
AAACTTCTACTCTTCTGTCAGGAGGACGGGAAGGTCATTTGCTGGCTTTGTGAGCGGTCTCAGGAGCACCGTGGTCACCA
CACGTTCCTCACAGAGGAGGTTGCCCGGGAGTACCAAGTAAGAGACTGGGATGGAAGGAAGAGAGGGCAGAAAATGGGAC
CAGATGGAAAATTTTCACTTTGCCTTTGACATTAACTGCCTTGTCATGATAGACCTGAGACCCGGGATTATTTTTTT---
----------------CATGCTATGCTTAACTTCTGAGGCTTTAAGGATGGTTTTTT-----------GCATTTCACCCA
ATTACAGGAGAATAATCCTAGAGTATATATTCCTGGCCGGGAGTAAATATTTTGTACCTTGGGTTAGATGGGTAGAGATT
TGGTGTCCAAGAAAAGCTCTGATTACCCCTTTCAGCAGGAGAGTAACAGGAGTGGGTTGAGATGTAAGTTTTTTCCTTGC
TGCAGGATTAGTTTTTTCTTCTAGGACAAAAAGAATCAGTCTACTCATGGTGAGGAGATGGGGAGGTCTATTACCTGAGA
TGTAGGGAGCACATTCACCAATGTAAGTTTTCTTCCAAGTCATGGATTCTCATTGCCATTCTCACAGTTTCTGCAAATTT
GTTTCTTCTGAGATCAACCTGATTTATTTCATGTTTATACTCTATCTA----GGTGCTGGAAAACCTCATAGCTTGACTA
TGGTGTGATTCCTTTCTCACAGGTGAAGCTCCAGGCAGCTCTGGAGATGCTGAGGCAGAAGCAGCAGGAAGCTGAAGAGT
TAGAAGCTGACATCAGAGAAGAGAAAGCTTCCTGGAAGGCAAGAGGATGTGGTTCCCGAAGGAGTTAGCTAGAAATCTGG
GCAGGACCAGGGGAAGGAGCTTTCTTCCTCTTTATTCCCTGACATTTGATAAGTCCAGAAGTCATTTGATTAGTCCTCTT
CATCCTTTCCCTGATGGGGTGTGGTGGCTGAGGAGTGAATATGTCACAGTGAACACAG-------TAGGGAGCTCTTTAC
ATGAAGGATCTCTCTGGTGAGGATGGCTAGTGAATCCTGCATTCTATTTTTGTGCTACTTTTTGAGTCCGTGACTCTACT
TGGGGAAGACATTTGGCAATGGCTCATGATTCTGTCCTCAGTGTTCAACTTTTGGCAGGGAGTTTGAGCTTGGGCTGAG-
-AAGTAATACAGGCAGGCATGAGTGTCCTGCATAGCTGTGTGAAAGGTAAGCTACATCCAGGTAACCCATTTTGATGCAG
GATGAACCT---CAATATACCCATTCAAGGTCATTGTTTTAAAATGTCATGAAGGAAAAGAAA---TAGGAAAAGGCAGC
TTTCCTAAGACCTACTCTCCTGCTACTATGTCCCCTCCTTGTGAGAACTCCCCAAAAGAAACAGCTCCTTTTCTGGCTAA
CAGCCTCTGCCTGGTAGACTGAGTGCCCCTTTCTCTTCTCTTATCTCTGAAGACTCAAATACAGTATGACAAAACCAACG
TCTTGGCAGATTTTGAGCAACTGAGAGACATCCTGGACTGGGAGGAGAGCAATGAGCTGCAAAACCTGGAGAAGGAGGAG
GAAGACATTCTGAAAAGCCTTACGAACTCTGAAACTGAGATGGTGCAGCAGACCCAGTCCCTGAGAGAGCTCATCTCAGA
TCTGGAGCATCGGCTGCAGGGGTCAGTGATGGAGCTGCTTCAGGTAAAAAGTGGAAAGAAGCCTGAGCACTGAGATTAAA
GAAAAGTGAAGGCTATTTCCTTCTCTGCGTTGCTGTGCTTTTTCTAATATTAACAATGTTCTCTGCAGGACCGCTTTTCT
GAAT------------------------------CAATTGCTGAAGTTATAAGAATAATTGAATGTAGAAGTAGCAAGAG
ATAATCCCATTTTTATTAATTTATCC-AGAGCAGTAGAAAAATTTGACGTAGTGGAGATGATCAATTAGCTCTAGTCATG
TTTGATAGGTTCCTATTCTCTGTATTCTAGTGTTGAG-ACTTACCAGTGCAGCTTTTCATTGCTCAGCTTAGCCACTGGC
AAACAAATACACGTCAAAATACAAGATGC--TTTTTATTTTTTTCCTTCATGGAATTAATTGAGA-CTTTTTCCTTTTTT
TTTAATTTT-CTGAAAAGAA-TTAAATAACTGCTATCATTTCTTCTTTATATGCTCAATAGAATTCACTAGTAAA--GGC
TGGGCGCGGTGGCTCACGCCTGTAATCCCAGCACTTTGGGAGGCCCAGGAGGGCCAGTCATGAGGTCAGGAGGCCCAGGC
GGGCCAGTCATGAGGTCAGGCGATTGAGACCATCCTGGCTAACACGGTGAAACCCCGTCTCTACTAAAAATACAAAAAAT
TCTAGATCCCTGAGGAATCGCCACACTGACTTCCACAATGGTTGAACTAGTTTACAGTCCCACCAACAGTGTAAAAGTGT
TCCTATTTCTCCACATCCTCTCCAGCACCTGTTGTTTCCAGACTTTTTAATGATTGCCATTCTAACTGGTGTGAGATGGT
ATCTCATTGTGGTTTTGATTTGCATTTCTCTGATGGCCAGTGATGATGAGCATTTTTTCATGTGCTTTTTGGCTGCATAA
ATGTCTTCTTTTGAGAAGTGTCTGTTCATGTCCTTCGCCCACTTTTTGATGGGGTTGTTTGTTTTTTTCTTGTAAATTTG
TTTGAGTTCATTGTAGATTCCGGATATTAGCCCTTTGTCAGATGAGTGGGTTGTGAAAATTTTCTCCCATTTTGTAGGTT
GCCTGTTCACTTTGATGGTAGTTTCTTTTGCTGTGCAGAAGCTCTTTAGTTTAATTAGATCCCATTTGTCAATTTTGTCT
TTTGTTGCCATTGCTTTTGGTGTTTTAGACATGAAGTCCTTGTCCATGCCTATGTCCTGAATGGTACTGCCTAGGTTTTC
TTCTAGGGTTTTTGTGGTTTTAGGTCTAACG-TTTAAGTCTTTAATCCATCTTGAATTGATTTTTGTATAAGGTGTAAGG
AAGGGATCCAGTTTCAGCTTTCTACATATGGCTAGCCAGTTTTCCCAGCACCATTTATTAAATAGGGAATCCTTTCCCCA
TTGCTTGTTTTTCTCAGGTTTGTCAAAGATCAGATAGTTGTAGATATGCGTCGTTATTTCTGAGGGCTCTGTTCTGTTCC
ATTGATCTATATCTCTGTTTTGGTACCAGTACCATGCTGTTTTGGTTACTGTAGCCTTGTAGTATAGTTTGAAGTCAGGT
AGTGTGATGCCTCCAGCTTTGTTCTTTTGGCTTAGGATTGCCTTGGTGATGCGGGCTCTTTTTTGGTTCCATATGAACTT
TAAAGTAGTTTTTTCCAATTCTGTGAAGTCATTGTTAGCTTGATGGGGATGGCATTGAATCTGTAAATTACCTTGGGCAG
TATGGCCATTTTCACGATATTGATTCTTCCTACCCATGAGCATGGAATGTTCTTCCATTTGTTTGTATCCTCTTTTATTT
CCTTGAGTAGTGGTTTGTAGTTCTCCTTGAAGAAGTCCTTCACGTCCCTTGTAAGTTGGATTCCTAGGTATTTTATTCTC
TTTGAAGCAATTGTGAATGGGAGTTCACTCATGATTTGGCTCTCTGTTTGTCTGTTGTTGGTGTATAAGAATGCTTGTGA
TTTTTGTACATTGATTTTGTATCCTGAGACTTTGCTGAAGTATACCATTTGACCCAGCCATCCCATTACTGGGTATATAC
CCAAAGGACTATAAATCATGCTGCTATAAAGACACATGCACACGTATGTTTATTGTGGCATTATTCACAATAGCAAAGAC
TTGGAACCAACCCAAATGTCCAACAATGATAGACTGGATTAAGAAAATGTGGCACGTATACACCATGGAATACTATGCAG
CCATAAAAAATGATGAGTTCATGTCCTTTGTAGGGACATGGATGAAATTGGAAATCATCATTCTCAGTAAACTATCGCAA
GAACAAAAAATCAAACACCGCATATTCTCACTCATAGGTGGGAATTGAACAATGAGATCACATGGACACAGGAAGGGGAA
TATCACACTCTGGGGACTATGGTGGGGTGGGGGGAGGGGGGAGGGATAGCACTGGGAGATATACCTAATGCTAGATGACG
AGTTAGTGGGTGCAGCGCACCAGCATGGCACATGTATACATATGTAACTAACCTGCACAATGTGCACATGTACTCTAAAA
CTTAAAGTATAATAAAACAAAAACAAAAACAAAAAAAACACAACAGAAGAAAAAAAAAAAAAAAGAAATGCAAGAAAGCT
AGCACCCCCAGGGGCATCCTTCAACCAATGGGGTTGGGAGTTGATGGAGAAATGCCTCAGCTCTCAGTGTTTCGGGCAGA
GATTCTGGGGCATTCCCAGGAGGTTTGGTGGGATCATGATCCCATAATGCCCAGAAACAACCCCAACAGCTTACTCATAC
ATTGGCTTCTCCTCCTCCCTGTCTTACCTCCCTGCTCCCTCATTCCTGCTTCCTGGGGTCAGGTAAATCACCTGGACCCA
GGTCCTTGTCTCAGGCTCTACGTTCAGTGTTTCTCATGCTGTATTCCTCGGAACCCCAGGGCACCTTAGGATGTGTCTAC
CCCTCTCTCACCTGCATTTGATTTAATGCTCTGTTGTCATCATCTTGAAATGTTTAATAAATTTTGAACAAGGGGCCGCA
TATTTTCATTTTGCATTGTACCCCACAAATGAAAAAAAATAA--TACAAAAAATTAGCCAGGCGTGGTGGCGGGCACCTG
TAATCCCAGCTACTTGGGAGGCTGAGGCAGGAGAATAGTGTGAACCCGGGAGGCGGAGCTTGCAGTGAGCCAAGACTGCA
CCACTGCACTCCAGCCTGGGCAACAGTGCGAGACTCCATCTCAAAAAAAAAA--------GAAAACTGCTCTTATCCCAA
TTTTCAAGAATACAATACA--TTGTTAACTATAATTGCCACATTCTGCAATAGATCTCTTGAAGATAGTCATCTTTTCAT
TCTGAAGTTGGTGTCCTTTTACCAATATCGGCCTCAACTCTCCCTACACCCCAGCTCCTGGAAACCCCTCTTCCACTCTC
TACTTTTAT-----------------------------------------------------------------------
--------------------------------------------------------------------------------
--------------------------------------------------------------------------------
--------------------------------------------------------------------------------
---------------GAGCTCAACTATTTTTTACATCTACATACTAAGTGATGTTATACAGTATTTGTCTTTCTGTTCCT
GACTTACTTTACTTAAAGTCCTCCATGGTGTGAGATAGTCTTCTGCATATGGCTATCCAGTTGTTCCAACAC--------
--------------------------------------------------------------------------------
--------------------------------------------------------------------------------
--------------------------------------------------------------------------------
--------------------------------------------------------------------------------
--------------------------------------------------------------------------------
--------------------------------------------------------------------------------
--------------------------------------------------------------------------------
--------------------------------------------------------------------------------
--------------------------------------------------------------------------------
--------------------------------------------------------------------------------
--------------------------------------------------------------------------------
--------------------------------------------------------------------------------
--------------------------------------------------------------------------------
--------------------------------------------------------------------------------
--------------------------------------------------------------------------------
--------------------------------------------------------------------------------
--------------------------------------------------------------------------------
--------------------------------------------------------------------------------
--------------------------------------------------------------------------------
--------------------------------------------------------------------------------
--------------------------------------------------------------------------------
--------------------------------------------------------------------------------
--------------------------------------------------------------------------------
--------------------------------------------------------------------------------
--------------------------------------------------------------------------------
--------------------------------------------------------------------------------
--------------------------------------------------------------------------------
--------------------------------------------------------------------------------
--------------------------------------------------------------------------------
--------------------------------------------------------------------------------
--------------------------------------------------------------------------------
--------------------------------------------------------------------------------
--------------------------------------------------------------------------------
--------------------------------------------------------------------------------
--------------------------------------------------------------------------------
--------------------------------------------------------------------------------
--------------------------------------------------------------------------------
--------------------------------------------------------------------------------
--------------------------------------------------------------------------------
--------------------------------------------------------------------------------
--------------------------------------------------------------------------------
--------------------------------------------------------------------------------
--------------------------------------------------------------------------------
-------------------------------------------------------------------------AACTGAG
AATGGTCCTACCACTGAGGGCAACCTCGCATTTAGATAGCTCGTAGACTGAGTCCACTGCACAGATCTAGAGCCTAGG-C
TGTGAGATACGGCCTGGAGGCTTATCCATAGATACCAGTCTGGAGTCTGGTGTCTTCAGACCTGCCAGGCTGGGTTTTAC
TAGGTTGAGCCCAGTGTTAGGGTCTGAGGTAACATTTGGTGCTCATTTTCCCCTCTTTCTCCTTGTGGAGGGTACCTCTC
ACACGCTATGCTGCCTAGAGTTGTAAGAGGGGT--------------GAAATGGAAAATGTAAAACTGTCCTTCCTACAT
TCTTCCATGAGTCTTTTTCTTCTTTCTGTGTTATACCCAGATGCTGTATGCTCCCACCCTATTTCTTAGTTCTGGTGAGG
TGTTTTAGTTCTTGGATGGTTGTTTAAATTGTTTTTGAGGGGAGACAACTGCTAGAGACTCCTATGATACTATTTTGCTG
ACATCCATCTGCAATTCCTTTCATTTCTATCTACAGCACACACACTTATGTCTCCTCTTTTATTCCTGATTTTGGTGATT
T-GTTTTCTCTCCCTTTTTTTGTCCTTTTAGTTATATTTGG-TCAATTTTGTTAACTTTTATGAAATTAAAAAGGCTTTT
TGCTGCATTGATTTT-ATCTTTTTTT-AACCTTTCTGTATCGTTTCTGCTCTGATCTTTATTATTTCATCTTTTTCGTTG
AGTTTTTT---GTTGTTCCTTTTCTAATTTTTCTAAGGTGAAATCTTAGATGCTGTGAAATCTTTTTTTTT-CTGATATA
GTGTTTAATAAATGAATTGCTTTAACTATATTTCATACATTTTAATTTTTGAGTTTTCATTTGGCTCAATGTATTTTCTA
ATTTTCTTTGTGATTTTTTGGTTTACTCTTGGGTTATTCAGAAAAGTAGTGTTTAATTTTAAAGCATTGAAGAATTTTTT
TAATGTTTCTTCTGCTGTGGATTTCAAATCCCATTCCTTGGTAATCAGATAACTTATTTTATCATTTGTTAATGTATTGA
AACTTATCTTATGGTATGGAACATTACATGAGCAGGAAAATGTTTTATATGCATTTGAAAAGAATATGTATTCTGCATTC
ATTTGGTGAAATAATCTAAAGATGTCCATTAGGTCAAGCTAACTGATAGTGTTAGTCTTCTATATCCTTTATGGTTTTTA
TACTAGTTTTTCTATTAATTACTGAGAGTAAATTATTGAAATCTTCACCAGTTGTTATTGAGTTGTCAGTTTTCCTTTTC
TTAATTCTTTATGTATTGTTTTCAGTATTTTGAAGCCCTGTTGTTAGGTGAAGATACACTAATATTGTTATTTCTTCTTG
ACATATTGAACCTTTCTTTCATTATGAAATATTCCTGTTATTCTCACATAGCAGTTCTTGCCTTAAAGTATCTTTGGTCT
AATATTAATATATCTACTTGAGTTGTCTTATGGTTACTGCTTGCATAGTATATATATTTTTATTTCTACTTTGGGTTTAT
TTATGC-TTTGAATCTAATATATGCTCTCCTATAGGTAGTGATAACCGAATCTTCTTCTTTACCCAGTCTGTCTGACAGT
CTCTGACTTTTCATTTGGGTTTTCATTATAACATTTAATGCAATTATTGATATAGTTTTACTTAAATTTACCATTTTGCT
ATTTGTTTTCTATATTTCTCCTGTCTTTTTTGATGTTGTTATTTTCTGCATCCTTAACTGGCTTCCTTTGTGTTAAATAA
ATATTTTCCAATGTAGATTTTTAGTTTTTCTCTTTTTCAGCTGTATGACATTAGTACTCTTCCTAGTGCTTGCTCTAATG
ATTACAATATGCATCTTGTCCTATCACAGCCACCTTCTGATTAATAGTAACTTAATTCCAGTAAAATACAGAAACTTCCC
TTCAATATTGCTTCATTTTCTTCATCTTTGGTTATCATTTTGTCATATATCTCACATGCATATATGTCATAACCTATTAA
TATAGTATTGAATTACTTTGTAATAAACTTAATGTCTTTTGAAGTTATTAAGAAAATACTTTGGGAAATAAACTATAGAT
TCTTTTATCTTAACTCACATTTTATAGTATTTCCATTTTGTTTAGGTTTATTATGAATTTGGGTAAATCTTTGGAGGAAA
TTAATTTCAACTGAAGAAATTTTAAAAACTATTTTTGGGAAGAAATATTTATGGGAAGAAATATTTTGCAGGGGCTCACA
CCTGTAATCTCAGCAATTTGGGAGGCTGGGGCAGGTGGATCACCTGAGATCAGGAGTTCAAGACCAGCTGGCCAACATGC
AGAAACCCCATCTCTACTAAAAATACAAAAATTAGCTGGACATGGTGGCACGTGCCTGTAATCCCACCTACTTGAGAAAC
TGAGGCAGGAGACTCGCTTGAACCTGGGAGGCAGAGGTTATACTGAGTCGAGATGGCACCACTGCACTGCAGCCTGGGCA
ACAGAGTCAGACTCTGTCTCAAAAAAAGAAAGAAAAAAA----GGAAAAAACATTTTTTCT-CCATCTTCCAGCAACAAA
TTCTCTCAGTCTTCATCTGAGAATATTTTTTTCTTCATATTTGAAGAAAATTTTTGCTTTATATGGAGTTTGGAGTTGAC
AGTTTCTTTTAGTGCTTTCAATAAGTCATTCCAGTCTTTTCTCTCATCTATTATT--TCAGATGAGAAGTCAGCTATTAA
TCATGTTGAAAGCATTCCTTATGTAATGATTAATTTTTCTCTTGCTGCTTTAGTTTTTT-CTTTGCCTTGATTGTAGCCT
TTGGAAGTTTTTCTATGATATGTGGGTCTCATATTAGTTATTTAACTTGGGGTTCATTGAACATAGATTTAGATATTAAT
ATAGATGAAATATTAATTTTTATAGAATGTAA-CAATTTTTCCCCAATTATTTTTTTCTACTTGAAAATGTAGCAACATA
CATGTAATAGATCTTAAAACAGGTTTTAAAA-CCTTTTCCTCTCTTCTTTCCTTCTGGAAGACCTATTACATGT------
--ACATTGCTACATTATGACATCTGACATGTCTTTGAGGCTCTTTTTATTTCTTAAGTCTTTTTTCCCTCTGTTCTTTAA
ATCAGAAAATTTTTATTGATGCAGCTTTTCAGGTTCAATGATCTTTTTGTGTGCTGTGGAGCACTTTTAGCAAATATTTC
ATTATTGTTATTTTACTTAAAATTTTCAGAATTTTTATTTCCTTATCATTTCTATCTCTC--GAGCATATCTATTTTTT-
GAGTCATTGTTTTT-ATACTTCAATTCTTTAAGCATAGTTCTCCTTAGTTTTTTAACCTATTTGCAATAGTTGCTTTGAA
GTCTTT-ATCTTCTAGCTCCAACATCTGGGGTCACTTGGGGATATTTTCTATTTATTGTTTTGTGGGGTTTTTTT-----
-------------------GT-GTTTTTTTTTT-AATCCCCCTGAGCTGTGGTATTCTATCTTGTTT----------CTT
TGTATGTGTACACATTTCTTTTGTAAATA---------ACATATATATA------TTTTAGACAGAGTCTCACTCTGTTG
CCCATGCTAGTATGTAGTGGTGCGATCTTGACTCACTATAGCCTCGACATCCTGAACTCAAGCAATCCCCTCACCTCAGA
CCCCAGACTAGCTGGGACTACAGCTCCGCACTACCATGCTCACCTAATTTTTGTATTTTTTGTAGAGATGGGATTTCACC
ATGTTGCCCAGGCTGGTCTCAATCCACTTGCCTCAGCCTCCCAAAGTCCTGGGATTACAGGAATGAGCCACTGCAGCTGG
CCAAAACATACATTTTTGTTACTTTGTTGTTTCTGAGAATTCCCATCCTCTAGTCTCTACCCAGCAAGAAGTGTTTCTGT
ACCTTCATTTATTTACTTCCCTGTGGTTGCTAATGTCTCTGCTGTGTTTAAAGAAAGCTAAAATATAATTTTTAAGTGTA
GGATCCTAGCTTTGTCCTGTGTGTCCATGTATCTTTGGTTTGCCTCTAATCTCGAATATAAGTTATGTTCAATCCCCTCA
AGGCAGTAAGGCTTCTGTCGTCTCCTGATGAATCTATGCTTGGGTAAGTGAGATTGCCCAGATTAATTCAAAGTTAAGGC
TGTTTAAAAATCTGCTACAATTTTCTCACTGATGTGTTGTTTCACTTATCCTTT-CCATATGTGTGTGTCTTTAGCATGG
CCAGGGTTGCATATAACTTACTCCTAGTTAAGTTAATATATGTAATTCCTGTTGTTTCCAGCCACAGTGCAGTAGTGCTT
TTAAGATGGGCATCTGGGCTGGGCGCAGTGGCTCATGCCTGTAATCCTAGCACTTTGGGAGGCCGAGGCGGGCGG-----
-----------ATCGAGACCATCCTGGCTTACACGGTGAAAACCCATCTCTACTAAAAATACAAAAGAAAAAAAAA----
-TTAGCTGGGTGTGGTGGTGGGAGCCTGTAGTCCCAGCTACTCGGGAGGCTGAAACAGGAGAATGGCATGAACCCAGGAG
GCAGAGCTTGCAGTGAGCTGAGATCGCACCACTGCACTCCAGCCTGGGTGACAGAGTGAGACTCCATCTCAAAAAAAAAA
AAAAAAAAAAAAAAA-----GATGGGCATCTGATCCAACACAGACAAATGCCATGCAAGCC-TAAAAGTTTTTTATGTTA
AAACTTAGAAG-----TTCTCCTTTCTGCTGGGGTTTATATCAGGAGAGTTACATTTCCTTCATGTACAGAGAATAAACT
CAATGTAGAGGAATAGGGAGAATTTGGAGAAGGACATTGATCATATTTTTGTTTTTTGTTTTCAGATGAAGTCTCGCTCT
GTTGCCCAGGCTGGAGTGCAGTGGTGTGATCTTGGATAACTGCAACCTCCGCCTCCTGGGTTCAAACAATTCTTGTGCCT
CAGCCGCCTGAGTAGCTGGGATT--ATAGGCATGCGTATGTTTTGAAGAGACGGGA------------------------
--------------------------------------------------------------------------------
--------------------------------------------------------------------------------
--------------------------------------------------------------------------------
--------------------------------------------------------------------------------
--------------------------------------------------------------------------------
--------------------------------------------------------------------------------
--------------------------------------------------------------------------------
--------------------------------------------------------------------------------
--------------------------------------------------------------------------------
------------TTTCACCAGATTGGCCAGGCTGGTCTTGAACTCCTGACCTCAAGTGATCTGCTCACCTTAGCCTCCCA
AAGTGCTGGGATCACAGGCAGGAGTCACTGCGCCCAGCCCATAGACCAGATCTTGATG--ACAAGGTTTGAGTTTCAAAA
TTCAGCTGTGACTGAAATTGTAATTACCCTTTCCAAAGTTTTTTTCACCA-----------------------------C
TTAATCCAGTTTTATTTGGTTTATGTTACATACAACATAAAAGTACTAATAC-AAAAAGCAAAACTATTTGATTGTATGT
GTAGATCCAGCTATTGGCTTTGTTCTTG-AAAAAAAATCTATGTGGAAAAATTGTGTCTGGCATAAAGGAGACCAAAGAC
ATTGCATTGGTACATATCTGCTAAAACAAAA----CAGTATTTGTGGTGATAAAGAGGAGTAGATTA-------------
--------------------CCTAAAACCATTAAGAATGTAAACTAGCTGGGTGCGGTGGCTCACGCCTGTAATCCCAGC
ACTTAGGGAGGCTGAGGCAGGCGGATCGCCTGAGGTTGGGAGTTCAAGACCAGCCCGACCAACATGGAGAAACCCTGTCT
CTACTAAAAATACAAAAA--TTAGCCAGGCGTGGTGGCGCACGCCTGTAATCCCAGCTACTCAGGAGGCTGAGGCAGGAG
AATCGCTTGAACCCAGGAGGTGGAGGTTGCGGTGAGCTGAGATCGCGCCGTTGCACTGCAGCCTGGGAAAC--GAGCGAA
ACCCCGTATCAAAAAAAAAAAAAAAAA-------------------------AGAATGTAGACCAAACTGTCCTGTTAGA
GACTA--GAGTTCAGAGTAAATGTAGTTTTTAGGACAATGACTGAGTAGATATTAGTAATATTATGGACAATGTGGTATA
AGAGAGAAGACAGTATGGTTGGTGTTACATAATAAAAATTCTTAGTTGTTGGTCCTTGTTGCTCCTTCACTACTGAATGT
ATTAAACTGCATTTAAGTGACAAAGTTGGGTAAAAGTAGGGAATTGGAAA-TCAGTTGCACATATGTGTGT--CAAACTT
AAGGAAGTGAATGAAGTCAGTTACAGTTAATGTCTAAAATGAAAAGAGAGCAACCTTAAGAAGTA---------------
--------------------------------------------------------------------------------
--------------------------------------------------------------------------------
--------------------------------------------------------------------------------
-------------------------CGTAGGCCGGGTGTCGTGGCACATGCCTGTAATCTCAGCACTTTGGGAGGCCAAG
GCAGGTGGATCACTTGAGGTCAGGAGTTCAAGACCAGCCTGACCAACATGGTGAAACCCCATTTCTACTAAAAA-TACAA
AAAAT-AGCCGGGCAT------TATGGTGGGCGCCAGTAATCCCAGCTACTCGGGAGGTTGAGGCAGGAGAATGGCTTGA
ACCCGGGAGGCGGAGGTTGCAGTGACCCGAGATCACGCCACTGCACTCC----TGGGCAACAAAGTGAGACTCCTTCTTA
AAAAAAAAGAAAGAAAGAAAA-----------------------------------------------------------
-----------ATATCTATACTTGTTTAGTACACTTGTTTGCTTATACCCTCAGCAAAGGCCGCGTAAACATCTTGAGCA
CTATTATTCATTCATCTTTGATTCTTCAAAATGTGACATAATGCCTGGAGAATAAGTTTATATATATATGTTTTCTTGTT
TATTTTTGTG---------ATTTTCTTTT----TGTTT-AGAAGTGGGGTCTTACTCTGAAACCCAGACTGGAGTGCAGT
AGTGTGATCCTAGCTCAGTGCAGCCTCAGTCAAACTTCTGGGCTCAA---ATTCTCCCACCTCATCTTCCCAAGTAGTTG
GAACTACAGGCTCATGCCACCATGCTTGGCTAATTTTTTTTTATTTTATTTTTTGTAGAGATGCGGTCATGCTATGTTGC
CTAGGCTGTACATCTGTTTAATAAATCAAAGAAGC---------------------------------------------
--------------------------------------------------------------------------------
--------------------------------------------------------------------------------
--------------------------------------------------------------------------------
--------------ACTAATTATTTAAATCATTTCATGGAGAGCCATATACGTTTGGAGAAAAA--CAAATTGTCAGTCA
CTTCTTTTCCTTCTAAACATGTCCCATC-----TGCAGAAACCAGGAGCCTCTTCCACAGGGATGAAAGCTATTTCTACT
TTTAAGGGAACTTGGAAATCTCACATGAGTCTTCTGGGATGATTGCC--TTGAGT-------------------------
--------------------------------------------------------------------------------
--------------------------------------------------------------------------------
--------------------------------------------------------------------------------
----------------------------------------CTTATCTTTGCTTTTTT-GTCTTTCACACTGTCACCATCT
CCATTCTCAGCACATTAGGAACCGGGGGAAATGTGATGAAGCTTTATAAGTGAGGAGAGACTCTTTCTTTCTTAATTGAT
GTTTTCTCTCTTCTTCCTAGGGTGTGGATGGCGTCATAAAAAGGTATGTGTGGGAGGACAGAGATGGT--CCTTTTGTGC
AGTGAGGAGAGATTTATAGCCATTA-------------------------------------------------------
--------------------------------------------------------------------------------
--------------------------------------------------------------------------------
--------------------------------------------------------------------------------
------------------------GAATTGTCCTGGGTTTAATTAGAATAAAACATCTCCCAGGGCAGAAAAATTTCGAT
ATTGTTTTATCAT-----------AAATTTCTGGTCATAAATCAGCATTCGAATGTTCTATAACTA--------------
--------------------------------------------------------------------------------
--------------------------------------------------------------------------------
--------------------------------------------------------------------------------
--------------------------------------------------------------------------------
--------------TTAAGAATAGACCAGATTTGGCCAGGTGTGGTGGCTCAAGCCTATAATCCCAGCACTTTGGGACGC
CGAGTCAGGAAGATCA----------GGAGTTTGAGACTAGCCTGGCCAACGTGGCAAAACCCTGTCTCTATCAAAAAAA
-------TACAAAAATTAGGGGGG-CGTGGTGGCCCGTGCCTGTAATCCCAGCTATTCGGGAGGCTGAGGCAGGAGAATT
GCTTGAATCCAGGAGGCAGAGGTTGCAGTGAGCCAAGACCATGCCACTGCACTCCAGTCTGGGCGACAAAGTGAGACTCT
GTCTTAGAAAAATCAA-TAAAATTAAAT--AAAA---TTAAAAAAAAGAAAA-GGAATAGACCAGATTCTATGGTAGAAA
ATTTGGGTGGTGGAGACTCGGAGTGTGGGTCAGTAGTGGTTTCAGGGAGAAGGTGTTGCAGTGTTGGACCCCTGCGCCAT
CACCATTTTATTACCTACATCTAGTTCTCTTTCTGTATTTAATAGGTTCTTGATTTATTTTGGATGGGCCATATCTTCTT
TTTCTCTTATATACCCCTAATTGTCCATTGGGACAATTCCCACATGTTTATATTTTCCTCCTGGAAAAAGA---------
--------------------------------------------------------------------------------
--------------------------------------------------------------------------------
--------------------------------------------------------------------------------
-------------------------------------------------------CCAGTTCC-TCTTCATTTATATTTA
GATTTCCAAAATCAGATGTTTATTTCCGGAATAATATTTCAAAATAATATTCTGGATAATATGTGGTCATGGTACAAAGA
ATTGATCCACCTCAGTTGCATTCTTTACAAGAGCATAAAAAGGTGCTATTCTTGTGTCTAAAATCGCACACCTCGCACAC
CTACGTGGTGGTATCAAGTTCTTTCTAACCACACGATATTCAGGCCAGTAATAGTTTAGTGC--ACATAATTTCTCATTT
GCCAAGTGTTTGTAATTTTTCCCGGAAATCTGAAACCTTAGATGTTATCTGAGTACCTCCCTGCTGGGAATAGCTTTGAA
GGTCTTAGGCCTCTCCAAACAGGATTCCTCTCTTGATATGTGTCAAA--CACCCAGGAG---------CCAGGTTCTGCA
ACCTCACTTTCTAACCATCTCCCTGGGAACTCAACATACATAGCGATGATGTTTCCACCCATTAAATGTTAGGGTTTCTT
TTGTAAGGCACCAAAGTTTTGTTTTGTTTT-------------------------------GTTTTAAAATCCTTTTTTT
TTTTTTT-----ATGTCCTATGAGTTTAAGAATGTAGACAGG--------------------------------------
--------------------------------------------------------------------------------
--------------------------------------------------------------------------------
--------------------------------------------------------------------------------
-------------------------GAGAGGTTAATTATTTCATTTTAGAAGGAAGAAACTGTG-CTTCTGAGAGGTTAA
GATCTTCCCACGTTCTCACAGAAAGTAAGTGGGAAGGCAAACATGAGAACATTTTGTTTGCCTCCAGGGTCAA-------
--------------------------------------------------------------------------------
--------------------------------------------------------------------------------
--------------------------------------------------------------------------------
-------------------------------------------------------------------------GAGTTTG
CACTCTCCCTTCTCAGGATCCCCAAGAAGAGAGTTCAAGTGCCTCAATGGGTTGAAATGATAGGAAGTCAGGGGTGTTCC
ACGGACACAAGGTCAAAGGTTTGGAAG------T-TTTTTTTTTTTTTTTT-AATTCTTAGGACGGAGAACGTGACCTTG
AAGAAGCCAGAAACTTTTCCAAAAAATCAAAGGAGAGTGTTTCGAGCTCCTGATCTGAAAGGAATGCTAGAAGTGTTTAG
AGGTGAGGAGAGCTAGATCAACAACAGGGTTATGGAATTCAAGTG------GTGTTAGGGTGCTAAATAGGGAAGAGGGT
GCAGTTTCCAAATATGGATAGAGGGGATAGGGGAGGATAGATATTGTCTGCTGCTGATGGGATTATATTTAATGGGAAAT
GGCTAGGTGGCTGTTTCATCTCATCATTCAGCAATTTACTGCCC---TACCATAGGGCATACCTACTCTTTCCCTAATCT
GGAGAGAAAATGAATTTCAGTGCTGACTCCTTT-GTTTGTATTCAATATTGTGCATTTTTATCATTTCAGAGCTGACAGA
TGTCCGACGCTACTGGGGTAAGGAGAAGTCACATTATCATAAGCCACCCTGCGGCTTATCA--------TTATTATTATC
TTTATCTTTTA-GAATTTTATGTT--------------------------------------------------------
--------------------------------------------------------------------------------
--------------------------------------------------------------------------------
--------------------------------------------------------------------------------
--------------------------------------------------------------------------------
--------------------------------------------------------------------------------
--------------------------------------------------------------------------------
--------------------------------------------------------------------------------
--------------------------------------------------------------------------------
--------------------------------------------------------------------------------
-CTCTATTAGG-CTCATGTTTTAAGATTTATGATTCTCCTTCCAAGACACACATAACTTACCCCTCCT------------
----------TATAACTTCTAAACAAGGTTCCTCCCAGTTTTCTCTCAAGTCTTTATCAAGATTTCTCTCATATCACA-A
ATAAAGTTACATTATATCCCTTAGCTGACCTGTTAATTTTTCTACAGTTGATGTGACAGTGGCTCCAAACAACATTTCAT
GTGCTGTCATTTCTGAAGATAAGAGACAAGTGAGCTCTCCGAAACCACAGATAATATATGGGGCACGAGGGACAAGATAC
CAGACATTTGT------GAATTTCAATTATTGTACTGGCATCCTGGGCTCTCAAAGTATCACATCAGGGAAACATTACTG
GGAGGTAGACGTGTCCAAGAAAACTGCTTGGATCCTGGGGGTATGTGCTGGCTTCCAACCTGATGCAATGTGTAATATTG
AAAAAAATGAAAATTATCAACCTAAATACGGCTACTGGGTTATAGGGTTAGAGGAAGGAGTTAAATGTAGTGCTTTCCAG
GATAGTTCCTTCCATACTCCTTCTGTTCCTTTCATTGTGCCCCTCTCTGTGATTATTTGTCCTGATCGTGTTGGAGTTTT
CCTAGACTATGAGGCTTGCACTGTCTCATTCTTCAATATCACAAACCATGGATTTCTCATCTATAAGTTTTCTCACTGTT
CTTTTTCTCAGCCTGTATTTCCATATTTAAATCCTAGAAAATGTGGAGTCCCCATGACTCTGTGCTCACCAAGCTCTTGA
ACCTTCTTACACACTCAGCCCCTTCTGTACAGCACCTCTTGTCCAGGTGCATCTCATACACCTGAACTCATTTGCATCAT
TTTAACCATCTTTTCCTTGCTGTCTCCCTTCTTTCTATTTGAACGTCCTTCACTCATCAGTAAAATGTAATAATTGCCTT
GTGCCATATTGTCCCCAATATTTTATTGACATTTGATAGCAATTTTTTT-CATCATTTTCCGTACTCCTAAGGAAAACTG
ACCTATACCTCATAAAATGAGACCGCTATTTAGGTATTACTTCTGCCAGATATTTATCACCCAATTGCCTCTGACACTGA
CTAAGAAGATGAAGAAAAGCTTTTCAACAGCCTTTCT-----ATATCATCGTGTGATAATTGTTCACCAATGAATGAGTC
CTTAGCCCTGTGTCAGTTTACCCTCGATGCCCTTATTTGT----GAGTTAAAGAGAAAATATCATAAATGGTATACTCTT
AAGTATAGAGGTTTTGTATCTAGAGGATCTCAGTTCAACTCCTGT------------CTCTCCATATACCAGCAGTGTAA
CTGTGAATAACATACTTAAATGGCTGTGCTTATTTCCTTTTCTTTTCTTTTTT-CTTTTTTTTTTTTTTT--GAGATGAA
GTTTTGCTCTTGTTCCCCAGGCTGGAGTGCAATGGCACGATCTCGGTTCACTGCAACCTCCACCTCTCAGATTCAAGCAA
TTCTCCTGCCTCAGCCTCCCAAGTAGCTGGGATTACAGGTGCCCACCACCACCCCTGGCTAAATTTGTATTTTCAGTAGA
GACGGGGTTTCCCCA-----TGTTGGTTAGGCTCGTCTAGAACCTCTGACCTCAGGTGATCCACCCGCCTCGGCCTCCCA
AAGTGCTGGGATTACAGGCGTGAGCCACGGCGCCCA----GCCTGTGCTTATTTTCTTAAAATAATTTTTGTATTAAAAA
CTTCACATTAAATAAGTGCTAATGTTTTATTGCATAGTAGGGTGACTAGAGTTAACAATAACCTATTGCATATATTTTGA
AATAGCTAGAAGAGAGGATTTTGAA------------------------AGTTCTCAACACAAAGAAATGACACATATTT
GAGGTGATGGATATGCTAATTACCC---TGGTTCGGTTATTACGCAATGTATACATGTATCAAAACATCACACTGTACCA
CATAAATATGTATATTTATTATTTGTCAATTAAAAGCAAAATAAAACAAAAAACCTTCATCTAATACTTTGGATCATTGT
GAAAAAATAAATTCCTGAAGTATAAAGCATCT
>Pan_troglodytes_TRIM5
GCGGTTCCTCT-AGGAAAATTCCTTTGTGCAGATCAGG-CCCGTGGATTGGTGAGTGAATCCTAACCACGTCTT----CC
CTGGCCTGTCTTCACTCTTCTCCCCAGAATCACCACTTCTGCACTGGTGTCTGAAGGTGTATTGAGTGATTTTGTGGAGG
GCAGAAGTAGGAAGTCTTTGGGACAAAACTGAATTTACCTTGGTGAGTTTAACTTATCTGAAAAGCTGTGCGGGGGTGGG
GAAAAGACACAGTTCACAGACTTCTTGCTGCCAGAGCTGACTGAGGGGAACAGAGCCGCCTGGCGGGCAGGCAGATTTGA
AAGAAGGGAGAGCTTT----------------------------------------------------------------
--------------------------------------------------------------------------------
--------------------------------------------------------------------------------
--------------------------------------------------------------------------------
----------------------------------AAAGTGAAGGGCTTTGTTTCC-GGAAGGCTGGTTATTTTTCCATGC
TGACTCTCTCCCCATCCCCTCCCTACTCTATACTTTTTAATTGAACTTTGCTGTACAGAGCCAGAATTCTCTCTTTCAGT
GTCTTCTCCCAACAACAAGGGCAAAGACAGGGGCCTTGGAATCCTAATGATTTAATGCCTATTAGTTTACTAATATAGTG
TTTCTGCATAACTCTACAGGTCAATTCTCATCACCTTGGCCTGGCTCTGTGACATCAGCCTTAATGGTGTGACAGCTGTC
CAGCTCTGTAGTCCTGTCATTGTCACTGGTAAATGGAGTTCTTTCTCTAGTTCATATTGGTTACAAAGATAATGGGAAAA
AA-GGCAAGCAGGTTTTATTTCTTGCTAGGAGTGGAGAGTAAGAGAGCTCCTTCTCTAAAGCCCCCTCCCCCAAAACAGT
GGAAAGCA-TTGGCTTTAAAAGAACTGAGTACGGGGAGAGAAAGGAGTGTTAGCCTATAGGGTGGAACTCCAGTTGTGCC
ACCTCTGTTTATAAACACATGTCTTCATACTGTGTCCGGAATTGGTGGGTTCTTGGTCTCACTGACTTCAAGAATGAAGC
CGCGGACGCTTGCGGTGAGTGTTACAGTTCTTAAAGGCGGCGTGTCTGGAGTTTGTTCCTTCTGATGTTCGGATGTGTTC
AGAGTTTCTTCTTTCTGGTGGGTTCGCGGTCTCGCTGGCTCAGGAGTGAAGCTGCAGACCTTCGCGGTGAGTGTTACAGC
TCATAAAGGCAGTGTGGACCCAAAGAGTGAGCAGTATCAAGATTTATTGCAAAGAGCAAAATAACAAAGCTTCCATAGCG
TGGAAGGGGACCAGCGCAGGTTGCCACTGCTGGCTCAGGCAGCCTGCATTTATTCTCTTATCTGGCCCCACCCACATCCT
CCTGATTGGTCCATTTTACAGAGAGCCGAGTGGTCTGTTTTGACAGGGCACTGATTGGTGCATTTACAATCCCTGAGCTA
GACACAAAAGTTCTCCA-GTCCCCACTAGATTAGCTAGATACAGAGTGTAGACACAAAGATTCTCTACATCCCCACCAGA
GTAGCTAGATACAGAGTGTCGATTGGTGCATTCACAAACCCCGAGCTAGACACAGGGTGCTGATTGGTGTGTTTACAAAC
CTTGAGCTAGATACAGA-----GTGCCGATTGGTGTATTTACAATCCCTTAGCTAGACATAAAGTTTCTCCAAGTCCCCA
CCAGAGTAGCTAGATACAGAGTGTCGATTGGTGCATTCACAAACCCTGAGCTAGACACAGGGTGCTGATTGGTGCATTTA
CAATCCCTTAGCTAAACATAAAGGTTCCGCAAGTCCCCACCAGACTCAGGAGCCCCACTGGCTTCACCCAGTGGATCCTG
CACCAGG-CCGCAGGTGGAGCTGCCTGCCAGTCCTGCGCCATGCCACGCACCTGCACTCCTCAGCCCTTGGGTGGTCGAT
GGGACTGGGCGCCGTGGAGCAGGGGGCGGTGCTCCTCAGGGAGGCTCGTGCAGCACAGGAGCCCAAGGGGTCGTGGGGAG
GCTCAGGCATGGCAGGCTGCAGGTCCCGAGCTCTGCCCCGCGGGGAGGCAGCTAAGGCCCGGCGAGAAATTGAGCACAGC
AGCTGCTGGCCCAGGTGCTAAGCTGCTCACTGCCCGGGGCAGCCGGGCCGGCCGGCCACTCCGAGTGCGGGGCCCACCAA
GCCCACGCCCACCCGGAACTCCAGCTGGCCCACAAGTGCCGCGCGCAGCCCCGGTTCCCGCTCGCCCCTCTCCCTCCACA
CCTCCCTGCAAGCTGAGGGAGCCAGCTCCGGCCTTGGCCAGCCCAGAAAGGGGCTCCCACAGTGCAGCGGTGGGCTGAAG
AGCTCCTCAAGTGCCGCCAAAGTGGGAGCCCAGGCAGAGGAGGCGCCGAGAGCAAGTGAGGGCTGCAAGGGCTGCCAGCA
TGCTGTCACCTCTCAATACAACCCAGGCACACAAAATGGTGGAGATTTTCTTGTTTGGTGTCGTGTGGGGGAGGGGGTAA
CTTAACACTCTAGTGATATGTTAATGATCTAAAGGCAATTAGGGATTGTCAGTTCCAGTTTTTACGCTGGTTTAGGGGTC
TAATTTCCCCCTTGGATCTGGTCAGGGGTCAAGATCTGGACCATGCTGGGCAGTCTGGCTTCTTCTTAAGCAACTTTGTC
TATAAATAAAGGGAATAAAGAAAAACGTTAAGAAAAATAACTTTCCCAGTTATTTCATCAGGGCTTCCCTGGTGACAGCA
TCTGTTTGCCTCTACTAGGGCACCAAGTCCAGACTCAGGGAACTACTGGATTTTCTTAAAAATCATTAACCTTGCTCCTC
CCTCTCCATGGGCCGTATCTGCCCCCCAAAAGCAGAGCTTAG--GTGAGATACGAAGAGCAGGAGAAGCATGTGGAAAGA
ATACCCA-------------------------------------------------------------------------
--------------------------------------------------------------------------------
--------------------------------------------------------------------------------
--------------------------------------------------------------------------------
--------------------------------------------------------------------------------
--------------------------------------------------------------------------------
--------------------------------------------------------------------------------
--------------------------------------------------------------------------------
--------------------------------------------------------------------------------
--------------------------------------------------------------------------------
--------------------------------------------------------------------------------
--------------------------------------------------------------------------------
--------------------------------------------------------------------------------
--------------------------------------------------------------------------------
--------------------------------------------------------------------------------
--------------------------------------------------------------------------------
--------------------------------------------------------------------------------
--------------------------------------------------------------------------------
--------------------------------------------------------------------------------
--------------------------------------------------------------------------------
--------------------------------------------------------------------------------
--------------------------------------------------------------------------------
--------------------------------------------------------------------------------
--------------------------------------------------------------------------------
--------------------------------------------------------------------------------
--------------------------------------------------------------------------------
--------------------------------------------------------------------------------
--------------------------------------------------------------------------------
--------------------------------------------------------------------------------
--------------------------------------------------------------------------------
--------------------------------------------------------------------------------
--------------------------------------------------------------------------------
--------------------------------------------------------------------------------
--------------------------------------------------------------------------------
--------------------------------------------------------------------------------
--------------------------------------------------------------------------------
--------------------------------------------------------------------------------
--------------------------------------------------------------------------------
--------------------------------------------------------------------------------
--------------------------------------------------------------------------------
--------------------------------------------------------------------------------
--------------------------------------------------------------------------------
--------------------------------------------------------------------------------
--------------------------------------------------------------------------------
--------------------------------------------------------------------------------
--------------------------------------------------------------------------------
--------------------------------------------------------------------------------
--------------------------------------------------------------------------------
--------------------------------------------------------------------------------
--------------------------------------------------------------------------------
--------------------------------------------------------------------------------
--------------------------------------------------------------------------------
--------------------------------------------------------------------------------
--------------------------------------------------------------------------------
--------------------------------------------------------------------------------
--------------------------------------------------------------------------------
--------------------------------------------------------------------------------
--------------------------------------------------------------------------------
--------------------------------------------------------------------------------
--------------------------------------------------------------------------------
--------------------------------------------------------------------------------
--------------------------------------------------------------------------------
--------------------------------------------------------------------------------
--------------------------------------------------------------------------------
--------------------------------------------------------------------------------
--------------------------------------------------------------------------------
--------------------------------------------------------------------------------
--------------------------------------------------------------------------------
--------------------------------------------------------------------------------
--------------------------------------------------------------------------------
--------------------------------------------------------------------------------
--------------------------------------------------------------------------------
--------------------------------------------------------------------------------
--------------------------------------------------------------------------------
--------------------------------------------------------------------------------
--------------------------------------------------------------------------------
--------------------------------------------------------------------------------
--------------------------------------------------------------------------------
--------------------------------------------------------------------------------
--------------------------------------------------------------------------------
--------------------------------------------------------------------------------
--------------------------------------------------------------------------------
--------------------------------------------------------------------------------
--------------------------------------------------------------------------------
--------------------------------------------------------------------------------
--------------------------------------------------------------------------------
--------------------------------------------------------------------------------
--------------------------------------------------------------------------------
--------------------------------------------------------------------------------
--------------------------------------------------------------------------------
--------------------------------------------------------------------------------
--------------------------------------------------------------------------------
--------------------------------------------------------------------------------
--------------------------------------------------------------------------------
--------------------------------------------------------------------------------
--------------------------------------------------------------------------------
--------------------------------------------------------------------------------
--------------------------------------------------------------------------------
--------------------------------------------------------------------------------
--------------------------------------------------------------------------------
--------------------------------------------------------------------------------
--------------------------------------------------------------------------------
--------------------------------------------------------------------------------
--------------------------------------------------------------------------------
--------------------------------------------------------------------------------
--------------------------------------------------------------------------------
--------------------------------------------------------------------------------
--------------------------------------------------------------------------------
--------------------------------------------------------------------------------
--------------------------------------------------------------------------------
--------------------------------------------------------------------------------
--------------------------------------------------------------------------------
--------------------------------------------------------------------------------
--------------------------------------------------------------------------------
--------------------------------------------------------------------------------
--------------------------------------------------------------------------------
--------------------------------------------------------------------------------
--------------------------------------------------------------------------------
--------------------------------------------------------------------------------
--------------------------------------------------------------------------------
--------------------------------------------------------------------------------
--------------------------------------------------------------------------------
--------------------------------------------------------------------------------
--------------------------------------------------------------------------------
--------------------------------------------------------------------------------
--------------------------------------------------------------------------------
--------------------------------------------------------------------------------
--------------------------------------------------------------------------------
--------------------------------------------------------------------------------
--------------------------------------------------------------------------------
--------------------------------------------------------------------------------
--------------------------------------------------------------------------------
--------------------------------------------------------------------------------
--------------------------------------------------------------------------------
--------------------------------------------------------------------------------
--------------------------------------------------------------------------------
--------------------------------------------------------------------------------
--------------------------------------------------------------------------------
--------------------------------------------------------------------------------
--------------------------------------------------------------------------------
--------------------------------------------------------------------------------
--------------------------------------------------------------------------------
--------------------------------------------------------------------------------
--------------------------------------------------------------------------------
--------------------------------------------------------------------------------
--------------------------------------------------------------------------------
--------------------------------------------------------------------------------
--------------------------------------------------------------------------------
--------------------------------------------------------------------------------
--------------------------------------------------------------------------------
--------------------------------------------------------------------------------
--------------------------------------------------------------------------------
--------------------------------------------------------------------------------
--------------------------------------------------------------------------------
--------------------------------------------------------------------------------
-------------AGTAGCTGGGATTACAGGCACCTGTCACCAAGCCCAGCTCATTTT-GTATTTTTAGTAGAGACAGAA
TTTCACCATGTTGGCCAGGAAGGTATTGAACTCCCAGCCTCAGGTGATCCGCCTGCCTTGGCCTCCCAAAGTGCTAGGAT
TACAAGCGTGAGCCACCACACCCGTCTGGTTAAGTTAAATATTAAAAGCTGAAGCCGGGCACGGTGGCTCACGCCTGTAA
TCCCAGCACTTTAGGAGGCCGAGGCAGGTGGATCACAAGGTCAGGAGTTGGAGACCAGACTGGCCAATATGGTGAAACCC
CATCTGTACCAAAAA--TACAAAAATTAGCCGGGTGTGGTGGTGCGTGCCTGTG--CCCAGCTGCTCGGGAGGCTGGGGC
AGAGGAGTCACTGGAACCTGGGAGGCGGAGGTTGTGGTGAGCCGAGATTGTGCCATTGCACTCCAGCCTGGGCAACAGAG
CAAGACTCCGTCTCAGAAAA---GAAAAAAAAATATTAAAAGCTGATAGAGCCAGTGCCCTTATACAAAGGCTGGAATGT
AACAGAAGCCCACTGAGAGTTTTGCCCAGGCCTTTCCTGGGCCTTGAAGCATGACAAGATAACGAAGGAATCGATT--AG
GACCTGTTTAGGATTAAACAAGTTTTAT-GGGGGTCTGAAGGAACTCCC-AGGCCTCCACAAACAAGTTTATTGAGGGTC
TGAAGGAACTCCCCAAACCTTAATGATTTAGCAGGAGAGACAAGATAAGGGTAATCACCCCAGCACCCGGATCCATCTAG
ATTAAGTAAATTTACTGAGGCACCAGAGGAAGGTCTTTAAAACTCAGACCTTAGTTATAGATTAGAAGAAG---TTA-AT
CACTTATGTTTTTAGATGAATAATGCACACCTATACGTAGACATATAGCTTAGAAGGTATATAAGCTCTGGAAAACTTTG
TAATTTTGAGTTGGTCTGGAGATATTTTCCAGGCCTTCTCCCTGTACG------CAGAAATAAAAATTCCCTTCTTTCCC
AGTAAATCTGCATCTCGTTATTGGGCCGCGAGAAGAAGCAGCC-GACCCTCCGTTTGGTCCGGGAACAAAATCATCTCAT
CTAATATTTTGAGACTTCTCTCTCAAGACTGATATCCATTGCCTCTGTGTTTCTAGTTTTCAAGTCTCCGACATGTGTGG
TCCACTGAGTATTTCTCTATCATCACTCTCTACACCATGT----------CTATACCTTTAGGCTCCAATAAATGTCCTT
GGCAAACTTTCAGGATGAGACTCCTCAGAACCTCCCAGCTGTTGTGGATTCCTCTACTTCCACACCCCAATTGCTCTGAG
TATTAATTGGATATATGCTGTTATCTCCATTTGTCATTGATTAACCAAAAGAGTGGCAAAGAGGCCAGTGAAAGAGGACC
CTGAATACGAGGTCATCTCAGGTCACCATATTGAAGATAAATAATTTTTGTAAATCACTTATTATGTCTATTTATACATT
TGATGAAACA--GTCATTCACTC--TGCTGATAATAAGAGCAATCATTGCAAATGTACAGTGAGTGGTGAGATTTGTTAC
ACTGCACATAAGGTAGTCAGAGCAGGTATTTTTGATAATATAACATGTAAGGAGAGAATTTAATAAAATCATACTAACAT
CAGAGAAACATTTCATGCTGAGAGAAGAGCAAATGTGAAAGCCCTGAGGCATAAGCTGTTTGGTGATTTTAATATTGAGG
ATGTGTTTTGGCGTGGGAAAGAAAAGCCAGGAGAGATGATGGGTCACACAAAGATCTTGGTAGAAAAGACCTCAGTCTGT
TTTCTATTCATTGAAAGTAAAGAAAAATGATAACCAATGCACAGATAAGAACAGAATTTGTCATATGACATGAACTGGCA
GTAAAGTATTTAAGGTGATTATGAAAAGCCCTTATTGCCAGGTAACCAAACACCTTTTCTTATTT-CTCCCCCTTTTTTT
---GTCCTTAATTATTTTCATCTTGCCCATTTTCTAATTGTGCACAATCAATATCCTTTCTATTT---CTACCTTTCTTA
CTTGGTCCCATTTTAACCTTCCCAATCATGCAGGGATCTGTGAACAAGAGGAACCTCAGCAGCCAGGACAGGCAGGAGCA
GTGGAATAGCTACTATGGCTTCTGGAATCCTGGTTAATGTAAAGGAGGAGGTGACCTGCCCCATCTGCCTGGAACTCCTG
ACACAACCCCTGAGCCTGGACTGCGGCCACAGCTTCTGCCAAGCATGCCTCACTGCAAACCACAAGAAGTCCATGCTAGA
CAAAG---GAGAGAGTAGCTGCCCTGTGTGCCGGATCAGTTACCAGCCTGAGAACATACGGCCTAATCGGCATGTAGCCA
ACATAGTGGAGAAGCTCAGGGAGGTCAAGTTGAGCCCAGAGG---GGCAGAAAGTTGATCATTGTGCACACCATGGAGAG
AAACTTCTACTCTTCTGTCAGGAGGACGGGAAGGTCATTTGCTGGCTTTGTGAGCGGTCTCAGGAGCACCGTGGTCACCA
CACGTTCCTCACAGAGGAGGTTGCCCGGGAGTACCAAGTAAGAGACTGGGATGGAAGGAAGAGAGGGCAGAAAATGGGAC
CAGATGGAAAATTTTCACTTTGCCTTTGACATTAACTGCCTTGTCATGATAGACCTGAGACCGGGGATTATTTTTTT---
----------------CATGCTATGCTTAACTTCTGAGGCTTTAAGGATGGTTTTTT-----------GCATTTCACCCA
ATTACAGGAGAATAATCCTAGAGTACATATTCCTGGCCGGGAGTAAATATTTTGTACCGTGGGTTAGATGGGTAGAGATT
TGGTGTCCAAGAAAAGCTCTGATTACCCCTTTCAGCAGGAGAGTAACTGGAGTGGGTTGAGATGTAAGTTTTTTCCTTGC
TGCAGGATCAGTTTTTTCTTCTAGGACAAAAAGAATCAGTCTACTCATGGTGAGGAGATGGGGAGGTCTATTACCTGAGA
TGTAGGGAACACATTCACCAATGTAAGTTTTCCTCCAAGTCATGGATTCTCATTGCCATTCTCACAGTTTCTGCAAATTT
GTTTCTTCTGAGATCAACCTGATTTATTTCATGTTTATACTCTATCTA----GGTGCTGGAAAACCTCATAGCTTGACTA
TGGTGTGATTCCTTTCTCACAGGTGAAGCTCCAGGCAGCTCTGGAGATGCTGAGGCAGAAGCAGCAGGAAGCTGAAGAGT
TGGAAGCTGACATCAGAGAAGAGAAAGCTTCCTGGAAGGCAAGAGGATGTGGTTCCCGAAGGCGTTAGCTAGAAATCTGG
GCAGGACCATGGGAAGGAGCTTTCTTCCTCTTTATTCCCTGACACTTCATAAGTCCAGAAGTCATTTGATTAGTCCTCTT
CATCCTTTCCCTGATGGGGTGTGGTGGCTGGGGAGTGAATATGTCACAATGAACACAG-------TAGGGAGCTATTTAC
ATGAAGGATCTCTCTGGTGAGGATGGCTAGTGAATCCTGCATTCTATTTTTGTGCTACTTTTTGAGTCCGTGACTCTACT
TGGGGAAGACATTTGGCAATGGCTCATGATTCTGTCCTCAGTGTTCAACTTTTGGCAGGGAGTTTGAGCTTGGGCTGAG-
-AAGTAATACAGGCAGGCATGAGTGTCCTGCATAGCTGTGTGAAAGGTAAGCTACATCCAGGTAACCCATTTTGATGCAG
GATGAACCT---CAATATACCCATTCAAGGTCATTGTTTTAAAATGTCATGAAGGAAAAGAAA---TAGGAAAAGTCAGC
TTTCCTA-GACCTACTCTCCTGCTACTATGTCCCCTCCTTGTGAGAACTCCCCAAAAGAA-CAGCTCTTTTTCTGGCTA-
CAGCCTCTGCNNNNNNNNNNNNNNNNNNNNNNNNNNNNNNNNNNNNNNNNNNNNNNNNNNNNNNTATGA-AAAACCAACG
TCTTGGCAGATTTTGAGCAACTGAGAGACATCCTGGACTGGGAGGAGAGCAATGAGCTGCAAAACCTGGAGAAGGAGGAG
GAAGACATTCTGAAAAGCCTTACGAAGTCTGAAACTGAGATGGTGCAGCAGACCCAGTCCGTGAGAGAGCTCATCTCAGA
TCTGGAGCGTCGGCTGCAGGGGTCAGTGATGGAGCTGCTTCAGGTAAAAAGTGGAAAGAAGCCTGAGCACTGAGATTAAA
GAAAAGTGAAGGCTATTTCCTTCTCTGCGTTGCTGTGCTTTTTCTAATATTAACAATGTTCTCTGCAGGACCACTTTTCT
GAAT------------------------------CAATTGCTGAAATTATAAGAATAATTGAATGTAGAAGTAGCAAGAG
ATAATCCCATTTTTATTAATTTATCC-AGAGCAGTAGAAAAATTTGACGTAGTAGAGATGATCAATTAGCTCTAGTCATG
TTTGATAGGTTCCTATTCTCTGTATTCTAGTGTTGAG-ACTTATCAGTGCAGCTTTTCATTGCTCAGCTTAGCCACTGGC
AAACAAATACACGTCAAAATACAAGATGC--TTTTTATTTTTTTCCTTCATGGAATTAATTGAGA-CTTTTTCCTCTTTT
TT-AATTTT-CTGAAAAGAA-TTAAATAACTGCTATCATTTCTTCTTTATATGCTCAATAGAATTCACTAGTAAA--GGC
CGGGCGCGGTGGCTCACGCCTGTAATCCCAGCACTTTGGGAGGCCCAGGCGGGCCAGTCATCAGGTCAGGAG--------
----------------------ATTGAGACCATCCTGGCTAACACGGAGAAACCCCGTCTCTACTAAAAATACAAAAAAT
TCTAGATCCCTGAGGAATCGCCACACTGACTTCCACAATGGTTGAACTAGTTTACAGTCCCACCAACAGTGTAAAAGTGT
TCCTATTTCTCCACATCCTCTCCAGCACCTGTTGTTTCCAGACTTTTTAATGATTGCCATTCTAACTGGTGTGAGATGGT
ATCTCATTGCGGTTTTGATTTGCATTTCTCTGATGGCCAGTGATGATGAGCATTTTTTCATGTGTTTTTTGGCTGCATAA
ATGTCTTCTTTTGAGAAGTGTCTGTTCATGTCCTTCGCCCACTTTTTGATGGGGTTGTTTGTTTTTTTCTTGTAAATTTG
TTTGAGTTCATTGTAGATTCCAGATATTAGCCCTTTGTCAGATGAGTAGGTTGTGAAAATTTTCTCCCATTTTGTAGGTT
GCCTGTTCACTCTGATGGTAGTTTCTTTTGCTGTGCAGAAGCTCTTGAGTTTAATTAGATCCTATTTGTCAATTTTGGCT
TTTGTTGCCATTGCTTTTGGTGTTTTAGACATGAAGTCCTTGCCCATGCCTATGTCCTGAATGGTACTGCCTAGGTTTTC
TTCTAGGGTTTTTATGGTTTTAGGTCTAACGATTTAAGTCTTTAATCCATCTTGAATTGANNNNNNNNNNNNNNNNNNNN
NNNNNNNNNNNNNNNNNNNNNNNNNNNNNNNNNNNNNNNNNNNNNNNNNNNNNNNNNNNNNNNNNNNNNNNNNNNNNNNN
NNNNNNNNNNNNNNNNNNNNNNNNNNNNNNNNNNNNNNNNNNNNNNNNNNNNNNNNNNNNNNNNNNNNNNNNNNNNNNNN
NNNNNNNNNNNNNNNNNNNNNNNNNNNNNNNNNNNNNNNNNNNNNNNNNNNNNNNNNNNNNNNNNNNNNNNNNNNNNNNN
NNNNNNNNNNNNNNNNNNNNNNNNNNNNNNNNNNNNNNNNNNNNNNNNNNNNNNNNNNNNNNNNNNNNNNNNNNNNNNNN
NNNNNNNNNNNNNNNNNNNNNNNNNNNNNNNNNNNNNNNNNNNNNNNNNNNNNNNNNNNNNNNNNNNNNNNNNNNNNNNN
NNNNNNNNNNNNNNNNNNNNNNNNNNNNNNNNNNNNNNNNNNNNNNNNNNNNNNNNNNNNNNNNNNNNNNNNNNNNNNNN
NNNNNNNNNNNNNNNNNNNNNNNNNNNNNNNNNNNNNNNNNNNNNNNNNNNNNNNNNNNNNNNNNNNNNNNNNNNNNNNN
NNNNNNNNNNNNNNNNNNNNNNNNNNNNNNNNNNNNNNNNNNNNNNNNNNNNNNNNNNNNNNNNNNNNNNNNNNNNNNNN
NNNNNNNNNNNNNNNNNNNNNNNNNNNNNNNNNNNNNNNNNNNNNNNNNNNNNNNNNNNNNNNNNNNNNNNNNNNNNNNN
NNNNNNNNNNNNNNNNNNNNNNNNNNNNNNNNNNNNNNNNNNNNNNNNNNNNNNNNNNNNNNNNNNNNNNNNNNNNNNNN
NNNNNNNNNNNNNNNNNNNNNNNNNNNNNNNNNNNNNNNNNNNNNNNNNNNNNNNNNNNNNNNNNNNNNNNNNNNNNNNN
NNNNNNAAAATGATGAGTTCATGTCCTTTGCAGGGACATGGATGAAATTGGAAATCATCATTCTCAGTAAAATATCGCAA
GAACAAAAAACCAAACACCGCATATTCTCACTCATAGGTGGGAATTGAACAATGAGATCACATGGACACAGGAAGGGGAA
TATCACACTCTGGGGACTGTGGAGGGGTGGGGGGAGGGGGGAGGGATAGCATTGGGAGATATACCTAATGCTGGATGACG
AGTTAGTGGGTGCAGCACACCAGCATGCCACATGTATACATATGTAACTAACCTGCACAATGTGCACATGTACCCTAAAA
CTTAAAGTATAATTAAAAAAAA--------AAAAAAAACACAACAGAAGAAAAAAAAAAA----GAAATGCAAGAAAGCT
AGCACCCCCAGGGGCATCCTTCAACCAATGGGGTTGGGAGTTGATGGAGAAATGCCTCAGCTCTCAGTGTTTCGGGCAGA
GATTCTGGGGCATTCCCAGGAGGTTTGGTGGGATCATGATCCCATAATGCCCAGAAACAACCCCAACAGCTTACTCGTAC
ATTGGCTTCTCCTCCTCCCTGTCTCACCTCCCTGCTCCCTCATTCCTGCTTCCTGGGGTCAGGTAAATCACCTGGACCCA
GGTCCTTGTCTCAGGCTCTACGTTCAGTGTTTTTCATGCTGTATTCCTCGGAACCCCAGGGCACCTTAGGATGTGTCTAC
CCCTCTCTCACCTGCATTTGATTTAATGCTCTGTTGTCATCATCTTGAAATGTTTAATAAATTTTGAACAAGGTGCCGCA
TATTTTCATTTTGCATTGTACCCCACAAATGAAAAAAAAAAAAATACAAAAAATTAGCCGGGCGTGGTGGCGGGCAGCTG
TAATCCTAGCTACTTGGGAGGCTGAGGCAGGAGGATAGTGTGAACCCGGGAGGCGGAGCTTGCAGTGAGCCAAGACTGCG
CCACTGCACTCCAGCCTGGGCAACAGTGCGAGTCTCCATCTCAAAAAAAAAAA-------GAAAACTGCTCTCATCCCAA
TTTTCAAGAATACAATACA--TTGTTAACTATAATTGCCACATTCTGCAATAGATCTCTTGAAGATAGTCACCTTTTCAT
TCTCAAGTTGGTATCCTTTTACCAATATCGGCCTCAACTCTCCCTATACCCCAGCTCCTGGAAACCCCTCTTCCACTCTC
TACTTTTAT-----------------------------------------------------------------------
--------------------------------------------------------------------------------
--------------------------------------------------------------------------------
--------------------------------------------------------------------------------
---------------GAGCTCAACTATTTTTTACATCTACATACTAAGTGATATTATACAGTATTTGTCTTTCTGTTCCT
GACTTACTTTACTTAAAGTCCTCCATGGTGTGAGATAGTCTTCTGCATATGGCTATCCAGTTGTTCCAACAC--------
--------------------------------------------------------------------------------
--------------------------------------------------------------------------------
--------------------------------------------------------------------------------
--------------------------------------------------------------------------------
--------------------------------------------------------------------------------
--------------------------------------------------------------------------------
--------------------------------------------------------------------------------
--------------------------------------------------------------------------------
--------------------------------------------------------------------------------
--------------------------------------------------------------------------------
--------------------------------------------------------------------------------
--------------------------------------------------------------------------------
--------------------------------------------------------------------------------
--------------------------------------------------------------------------------
--------------------------------------------------------------------------------
--------------------------------------------------------------------------------
--------------------------------------------------------------------------------
--------------------------------------------------------------------------------
--------------------------------------------------------------------------------
--------------------------------------------------------------------------------
--------------------------------------------------------------------------------
--------------------------------------------------------------------------------
--------------------------------------------------------------------------------
--------------------------------------------------------------------------------
--------------------------------------------------------------------------------
--------------------------------------------------------------------------------
--------------------------------------------------------------------------------
--------------------------------------------------------------------------------
--------------------------------------------------------------------------------
--------------------------------------------------------------------------------
--------------------------------------------------------------------------------
--------------------------------------------------------------------------------
--------------------------------------------------------------------------------
--------------------------------------------------------------------------------
--------------------------------------------------------------------------------
--------------------------------------------------------------------------------
--------------------------------------------------------------------------------
--------------------------------------------------------------------------------
--------------------------------------------------------------------------------
--------------------------------------------------------------------------------
--------------------------------------------------------------------------------
--------------------------------------------------------------------------------
--------------------------------------------------------------------------------
-------------------------------------------------------------------------AACTGAG
AATGGTCCTACCACTGAGGGCAACCTGGCATTTAGATGGCTCGTAGACTGAGTCCACTGCACAGATCTAGAGCCTAGG-C
TGTGAGATACGGCCTGGAGGCTTATCCATAGATACCAGTCTGGAGTCTGGTGTCTTCAGACCTGCCAGGCTGGGTTTTAC
TAGGTTGAGCCCAGTGTTAGGGTCTGAGGTAACGTTTGGTGCTCATTTTCCCCTCTTTCTCCTTGTGGAGGGTACCTCTC
ACACGCTATGCTGCCTAGAGTTGTAAGAGGGGT--------------GAAATGGAAAATGTAAAACTGTCCTTCCTACAT
TCTTCCATGAGTCTTTTTCTTCTTTCTGTGTTATACCCAGATGCTGTATGCTCCCACCCTATTTCTTAGTTCTGGTGAGG
TGTTTTAGTTCTTGGATGGTTGTTTAAATTGTTTTTGGGGGGAGACAACTGCTAGAGACTCCTATGATACTATTTTGCTG
ACATCCATCTGCAATTCCTTTCATTTCTATCTACGGCACACACACTTATGTCTCCTCTTTTATTCCTGATTTTGGTGATT
T-GTTTTCTCTCCCTTTTTTTGTCCTTTTAGTTATATTTGG-TCAATTTTGTTAACTTTTACGAAATTAAAAAGGCTTTT
TGCTACATTGATTTT-ATCTTTTTTTTAACCTTTCTGTATCGTTTCTGCTCTGATCTTTATTATTTCATCTTTTTTGTTG
AGTTTTTT---GTTGTTCCTTTTCTAATTTTTCTAAGGTGAAATCTTAGATGCTGTGAAATCTTTTTTTT--CTGATATA
GTGTTTAATAAATGAATTGCTTTAACTATATTTCATACATTTTAATTTTTGAGTTTTCATTTGGCTCAATGTATTTTCTA
ATTTTCTTTGTGATTTTTTGGTTTACTCTTGGGTTATTCAGAAAAGTAGTGTTTAATTTTAAAGCATTTAAGAATTTTTT
TAATGTTTCTTCTGCTGTGGATTTCAAATCCCATTCCTTGGTAATCAGATAACTTATTTTATCATTTGTTAATGTATTGA
AACTTATCTTATGGTATGGAACATTACATGAGCAGGAAAATGTTTTATATGCATTTGAAAAGAATATGTATTCTGCATTC
ATTTGGTGAAATAATCTAAAGATGTCCATTAGGTCAAGCTAACTGATAGTGTTAGTCTTCTATATCCTTTATGGTTTTTA
TACTAGTTTTTCTATTAATTACTGAGAGTAAATTATTGAAATCTTCGCCAGTTGTTATTGAGTTGTCAGTTTTCCTTTTC
TTAATTCTTTATGTATTGTTTTCAGTATTTTGAAGCTTTGTTGTTAGGTGAAGATACACTAATATTGTTATTTCTTCTTG
ACATATTGAACCTTTCTTTCATTATGAAATATTCCTGTTATTCTCACATAGCAGTTCTTGCCTTAAAGTATCTTTGGTCT
AATATTAATATATCTACTTGAGTTGTCTTATGGTTACTGCTTGCATAGTATATATATTTTTATTTCTACTTTGGGTTTAT
TTATGC-TTTGAATCTAATATATGCTCTCCTATAGGTAGTGATAACCGAATCTTCTTCTTTACCCAGTCTGTCTGACAGT
CTCTGACTTTTCATTTGGGTTTTCATTATAACATTTAATGCAATTATTGGTATAGTTTTACTTAAATTTACCATTTTGCT
ATTTGTTTTCTATATTTCTCCTGTCTTTTTTGATGTTGTTATTTTCTGCATCCTTAACTGGCTTCCTTTGTGTTAAATAA
ATATTTTCCAATGTAGATTTTTAGTTTTTCTCTTTTTCAGCTGTATGACATTAGTACTCTTCCTAGTGCTTGCTCTAATG
ATTACAATATGCATCTTGTCCTATCATAGCCACCTTCTGATTAATAGTAACTCAATTCCAGTAAAATACAGAAACTTTCC
TTCAATATTGCTTCATTTTCCTCATCTTTGGTTATCATTTTGTCATATATCTCACATGCATATATGTTATAACCTATTAA
TATAGTATTGAATTACTTTGTAATAAAC--AATGTCTTTTGAAGTTATTAAGAAAATACTTTGGGAAATAAACTATAGAT
TCTTTTATCTTAACTCACATTTTATAGTATTTCCATTTTGTTTAGGTTTATTATGAATTTGGGTAAATCTTTGGAGGAAA
TTAATTTCAACTGAAGAAATTTTAAAAAATATTTTTGGGAAGAAATATTTATGGGAAGAAATATTTTGCAGGGGCTCACA
CCTGTAATCTCAGCAATTTGGGAGGCTGAGGCAG-TGGATCACCTGAGGTCAGGAGTTCAAGACCAGCTGGCCAACATGC
AGAAACCCCATCTCTACTAAAAATACAAAAATTAGCTGGGCATGGTGGCACGTGCCTATAATCCTACCTACTTGAGAAAC
TGAGGCAGGAGAATCGCTTGAACCTGGGAGGCAGAGGTTATACTGAGTCGAGATGGCACCACTGCACTCCAGCCTGGGCA
ACAGAGTCAGACTCTGTCTCAAAAAAAGAAAGAAAAAAA----GGAAAAAACATTTTTTCT-CCGTCTTCCAGCAACAAA
TTCTCTCAGTCTTCATCTGAGAATATTTTTTTCTTCATATTTGAAGAAAATTTTTGCTTTATATGGAGTTTGGAGTTGAC
AGTTTCTTTTAGTGCTTTCAATAAGTCACTCTAGTCTTTTCTCTCATCTATTATT--TCAGATGAGAAGTCAGCTATTAA
TCATGTTGAAAGCATTCCTTATATAATGATTAATTTTTCTCTTGCTGCTTTAATTTTTT-CTTTGCTTTGATTGTAGCCT
TTGGAAGTTTTTCTATGATATGTGGGTCTCATATTAGTTATTTAACTTGGGGTTCATTGAACATAGATTTAGATATTAAT
ATAGATGAAATATTAATTTTTATAGAATGTAAACAATTTTTCCCCAATTATTTTTTTCTACTTGAAAATGTAGCAACATA
CATGTAATAGATCTTAAAACAGGTTTTAAAAACCTTTTCCTCTCTTCTTTCCTTCTGGAAGACCTATTACATGT------
--ACATTGCTACATTGTGACATCTGACATGTCTTTGAGGCTCTTTTTATTTCTTAAGTCTTTTTTCCCTCTGTTCTTTAA
ATCAGAAAATTTTTATTGATGCAGCTTTTCAGGTTCAATGATCTTTTTGTGTGCTGTGGAGCACTTTTAGCAAATATTTC
ATTATTGTTATTTTACTTACAATTTTCAGAATTTTTATTTCCTTATCATTTCTATCTCTC--GAGCATATCTGTTTTTT-
GAGTCATTGTTTTTTATCCTTCAATTCTTTAAGCATAGTTCTCCTTAGTTTTTTAACCTATTTGCAATAGTTGCTTTGAA
GTCTTT-ATCTTCTAGCTCCAACATCTGGGGTCACTTGGGGATATTTCCTATTTATTGTTTTGTGGGGTTTTTTT-----
-------------------GT-GTTTTTTTTT--AATCCCCCTGAGCTGTGGTATTCTATCTTGTTT----------CTT
TGTATGTGTACACATTTCTTTTGTAAATA---------ACATATATATA------TTTTAGACAGAGTCTCACTCTGTTG
CCCATGCTAGTATGTAGTGGTGCGATCTTGACTCACTATAGCCTCGAAATCCTGAACTCAAGCAATCCCCTCACCTCAGA
CCCCAGAGTAGCTGGGACTACAGCTCCGCACTACCATGCTCACCTAATTTTTGTATTTTTTGTAGAGATGGGATTTCACC
ATGTTGCCCAGGCTGGTCTCAATCCACTTGCCTCAGCCTCCCAGAGTCCTGGGATTACAGGAATGAGCCACTGCAGCTGG
CCAAAACATACATTTTTGTTACTTTGTTGTTTCTGAGAATTCCCATCCTCTAGTCTCTACCCAGCAAGAAGTGTTTCTGT
ATCTTCATTTAGTTACTTCCCTGTGGTTGCTAATGTCTCTGCTGTGTTTAAAGAAAGCTAAAATATAATTTTTAAGTGTG
GCATCCTAGCTTTGCCCTGTGTGTCCATGTATCTTTGGTTTTTCTCTAATCTCGAATATAAGTTATGTTCAATCTCCTCA
AGGCAGTAAGGCTTCTGTCGTCTCCTGATAAATCTATGCTTGGGTAAGTGAGATTGCCCAAATTAATTCAAAGTTAAGGC
TGTTTAAAAATCTGCTACAATTTACTCACTGATATGTTGTTTCACTTATCCTTT-CCATACGTGTGTGTCTTTAGCATGG
CCAGGGTTGCATATAACTTACTCCTAGTTAAGTTAATATATGTAATTCCTGTTGTTTCCAGCCACAGTGCCGTAGTGCTT
TTAAGATGGGCATCTGGGCTGGGTGCAGTGGCTCATGCCTGTAATCCTAGCACTTTGGGAGACCGAGGCAGGCGG-----
-----------GTCGAGACCATCCTGGCTAACACGGTGAAACCCCATCTCTACTAAAAATACAAAAGAAAAAAAAAA---
-TTAGCTGGGTGTGGTGGTGGGAGCCTGTAGTCCCAGCTACTCGGGAGGCTGAAACAGGAGAATGGCATGAACCCAGGAG
GCAGAGCTTGCAGTGAGCTGAGATCGCACCACTGCACTCCAGCCTGGGTGACAGAGTGAGACTCCATCTCAAAAAAAAAA
AAAAAAAAAAAA--------GATGGGCATCTGATCCAACACAGACAAATGCCATGCAAGCC-TAAAAGTTTTTTATGTTA
AAACTTAGAAG-----TTCTCCTTTCTGCTGGGGTTTATATCAGGAGAGTTACATTTCCTTCATGTACAGAGAATAAACT
CAATGTAGAGGAATAGGGAGAATTTGGAGAAGGACATTGATCATATTTTTGTTTTTTGTTTTCAGATGAAGTCTCACTCT
GTTGCCCAGGCTGGAGTGCAGTGGTGTGATCTTGGATAACTGCAACCTCCGCCTCCTGGGTTCAA-CAATTCTTGTGCCT
CAGCCTCCTGAGTAGCTGGGAT---ATAGGCANNNNNNNNNNNNNNNNNNNNNNNNNNNNNNNNNNTATGCTGGGTAAGT
GAGATTGCCCAAATTAATTCAAAGTTAAGGCTGTTTAAAAATCTGCTACAATTTACTCACTGATATGTTGTTTCACTTAT
CCTTTCCATACGTGTGTGTCTTTAGCATGGCCAGGGTTGCATATAACTTACTCCTAGTTAAGTTAATATATGTAATTCCT
GTTGTTTCCAGCCACAGTGCCGTAGTGCTTTTAAGATGGGCATTTGGGCTGGGTGCAGTGGCTCATGCCTGTAATCCTAG
CACTTTGGGAGACCGAGGCAGGCGGGTCGAGACCATCCTGGTTAACACGGTGAAACCCCATTTTTATTAAAAATACAAAA
GAAAAAAAAAATTAGCTGGGTGTGGTGGTGGGATCCACTCGTCCCAGCTACTCGGGAGGCCGAAACAGGCGAATGGCATG
ACCCCAGGCGGCAGAGCCCACCCCGAGCACCGATAGCCCCAATGCAGTCCAATCCGGGCAACAGAGTGAGACTCCATTTC
AAAAAAAAAAAAAAAAAAAAAAGATGGGCATCTGATCCAACACAGACAAATGCCATGCAAGCCTAAAAGTTTTTTATGTT
AAAACTTAGAAGTTCTCCTTTCTGCTGGGGTTTATATCAGGAGAGTTACATTTCCTTCATGTACAGAGAATAAACTCAAT
GTAGAGGAATAGGGAGAATTTGGAGAAGGACATTGATCATATTTTTGTTTTTTGTTTTCAGATGAAGTCTCACTCTGTTG
CCNNNNNNNNNNTTTCACCAGATTGGCCAGGCTGGTCTTGAACTCCTGACCTCAAGTGATCTGCTCACCTTAGCCTCCCA
AAGTGCTGGGATCACAGGCAGGAGTCACTGCGCCCAGCCCATAGACCAGATCTTGATG--ACAAGGTTTGAGTTTCAAAA
TTCAGCTGTGACTGAAATTGTAATTACCCTTTCCAAAATTTTTTTCACCA-----------------------------C
TTAATCCAGTTTTATTTGGTTTATGTTACATACGACATAAAAGTACTAATAC-AAAAAGCAAAACTATTTGATTGTATGT
GTAGATCCAGCTATTGGCTTTGTTCTTG-AAAAAAAATCTATGTGGAAAAATTGTGTCTGGCATAAAGGAGACCAAAGAC
ATTGCATTGGTACATATCTGCTAAAACAAAA----CAGTATTTGTGGTGGTAAAGAGGAGTAGATAAAGAGGTGATAAAG
AGGAGTGGTTTTAGTAGATTCCTAAAACCATTAAGAATGTAAACTAGCTGGGTGCGGTGGCTCACGCCTGTAATCCCAGC
ACTTTGGGAGGCTGAGGCAGGCGGATTGCCTGAGGTTGGGAGTTCGAGACCAGCCCGACCAACATGGAGAAACCCTGTCT
CTACTAAAAATACAAAAA--TTAGCCAGGCGTGGTGGCGCACACCTATAATCCCAGCTACTCAGGAGGCTGAGGCAGGAG
AATCGCTTGAACCCAGGAGGTGGAGGTTGCGGTGAGCTGAGATCGCGCCATTGCACTCCAGCCTGGGAAAC--GAGCGAA
ACCCCGTATCAAAAAAAAAAAAAAAAA--------------------------GAATGTAGACCAAACTGTCCTGTTAGA
GACTA--GAGTTCAGAGTAAATGTAGTTTTTAGGACAATGACTGAGTAGATATTAGTAATATTATGGACAATGTGGTATA
AGAGAGAAGACAGTATGGTTGGTGTTACATAATAAAAATTCGTAGTTGTTGGTCCTTGTTGCTCCTTCACTACTGAATGT
ATTAAACTGCATTTAAGTGACAAACTTGGGTAAAAGTAGGGAATTGGAAA-TCAGTTGCACATATGTGTGT--CAAACTT
AAGGAAGTGAATGAAGTCAGTTACAGTTAATGTCTAAAATGAAAAGAGAGCAACCTTAAGAAGTA---------------
--------------------------------------------------------------------------------
--------------------------------------------------------------------------------
--------------------------------------------------------------------------------
-------------------------TGTAGGCCGGGTGTCGTGGCACATGCCTGTAATCTCAGCACTTTGGGAGGCCAAG
GCAGGTGGATCATTTGAGGTCAGGAGTTCAAGACCAGCCTGACCAACATGGTGAAACCCCATTTCTACTAAAAA-TACAA
AAAATTAGCCGGGTGT------GGTGGCGGGTGCCTGCAGTCCCAGCTACTCGGGAGGTTGAGGCAGGAGAATGGCTTGA
ACCCGGGAGGCGGAGGTTACAGTGAGCCGAGATCACGCCACTGCACTCC----TGGGCAACAGAGTGAGACTCCTTCTTA
AAAAAAAAGAAAGAAAGAAAA-----------------------------------------------------------
-----------ATATCTATACTTGTTTAGTACACTTGTTTGCTTATACCCTCAGCAAAGGCCGCGTAAACATCTTGAGCA
CTATTATTCATTCATCTTTGATTCTTCAAAATGTGACATAATGCCTGGAGAATAAGTTTATATATATATGTTTTGTTGTT
TATTTTTGTG---------ATTTTGTTTT----TGTTT-AGAAATGGGGTCTTACTCTGAAACCCAGACTGGAGTGCAGT
AGTGTGATCCTAGCTCAGTGCAGCCTCAGTCAAACTTCTGGGCTCAA---ATTCTCCCACCTCAGCTTCCCAAGTAGTTG
GAACTACAGGCTCATGCCACCATGCTTGGCTAATTTTTTTTTATTTTATTTTTTGTAGAGATGCGGTCATGCTATGTTGC
TTAGGCTGTACATCTGTTTAATAAATCAAAGAAGC---------------------------------------------
--------------------------------------------------------------------------------
--------------------------------------------------------------------------------
--------------------------------------------------------------------------------
--------------ACTAATTATTTAAATCATTTCATGGAGAGCCATATACGTTTGGAGAAAAA--CAAATTGTCAGTCA
CTTCTTTTCCTTCTAAACATGTCCCATC-----TGCAGAAACCAGGAGCCTCTTCCACAGGGATGAAAGCTATTTCTACT
TT-AAGGGAACTTGGAAATCTCACATGAGTCTTCTGGGATGATTGCC--TTGAGT-------------------------
--------------------------------------------------------------------------------
--------------------------------------------------------------------------------
--------------------------------------------------------------------------------
----------------------------------------CTTATCTTTGCTTTTTT-GTCTTTCACACTGTCACCATCT
CCATTCTCAGCACATTAGGAACTGGGGGAAATGTGATGAAGCTTTATAAGTGAGGAGAGACTCTTTCTTTCTTAATTGAT
GTTTTCTCTCTTCTTCCTAGGGTGTGGATGGCGTCATAAAAAGGTATGTGTGGGAGGACAGAGATGGT--CCTTTTGTGC
AGTGAGGAGAGATTTATAGCCATTA-------------------------------------------------------
--------------------------------------------------------------------------------
--------------------------------------------------------------------------------
--------------------------------------------------------------------------------
------------------------GAATTGTCCTGGGTTTAATTAGAATAAAACATCTCCCAGGGCAGAAAAATTTCGAT
ATTGTTTTATCAT-----------AAATTTCTGGTCATAAATCAGCATTCGAATGTTCTGTAACTA--------------
--------------------------------------------------------------------------------
--------------------------------------------------------------------------------
--------------------------------------------------------------------------------
--------------------------------------------------------------------------------
--------------CTAAGAATAGACCAGATTTGGCCACGTGTGGTGGCTCAAGCCTATAATCCCAGCACTTTGGGACGC
CGAGTCAGGAAGATCA----------GGAGTTTGAGACCAGCCTGGCCAACGTGGCAAAACCCTGTCTCTATCAAAAAAA
-------TACAAAAATTAGGGGGG-CGTGGTGGCACACGCCTGTAATCCCAGCTATTCGGGAGGCTGAGGCATGAGAATT
GCTTGAATCCAGGAGGCAGAGGTTGCAGTGAGCCGAGACCATGCCACTGCACTCCAGTCTGGGCGACAAAGTGAGACTCT
GTCTTAGAAAAATCAA-TAAAATTAAAT--AAAA---TTAAAAAAAAAAAA--GGAATAGACCAGATTCTATGGTAGAAA
ATTTGGGTGGTGGAGACTCAGAGTGTGGGTCAGTAGTGGTTTCAGGGATAAGGTGTTGCAGTGTTGGACCCCTGTGCCAT
CACCATTTTATTACCTACATCTAGTTCTGTTTCTGTATTTAATAGGTTCTTGATTTATTTTGGATGGGCCATATCTTCTT
TTTCTCTTATATACCCCTAATTGTCCATTGGGACAATTCCCACATGTTTATATTTTCCTCCTGGAAAAAGA---------
--------------------------------------------------------------------------------
--------------------------------------------------------------------------------
--------------------------------------------------------------------------------
-------------------------------------------------------CCATTTCC-TCTTCATTTATATTTA
GATTTCCAAAATCAGATGTTTATTTCCGGAATAATATTTCAAAATAATATTCTGGATAATATGTGGTCATGGTACAAAGA
ATTGATCCACCTCAGCTGCGTTCTTTAGAAGAGCATAAAAAGGTGCTATTCTTGTGTCTAAAATCGCACACCTCGCACAC
CTACGTGGTGGTGTCAAGTTCTTTCTAACCACATGATATTCAGGCCAGTAATAGTTTAGTGC--ACATAATTTCTCATTC
GCCAAGTGTTTGTAATTTTTCCCAGAAATCTGAAACCTTAGATGTTATCTGAGTACCTCCCTGCTGGGAATAGCTTTGAA
GGTTTTAGGCCTCTCCAAACAGGATTCCTCTCTTGATATGTGTCAAA--CACCCAGGAG---------CCAGGTTCTGCA
ACCTCACTTTCTAACCATCTCCCTGGGAACTCAACATACATAGCGATGATGTTTCCACCCATTAAATGTTAGGGTTTCTT
TTGTAAGGCACCAAAGTTTTGTTTTGTTTT---------------------GTTTTGTTTTGTTTTAAAATCCTTTTTTT
TTTTTT------ATGTCCTATGAGTTTAAGAATGTAGACAGG--------------------------------------
--------------------------------------------------------------------------------
--------------------------------------------------------------------------------
--------------------------------------------------------------------------------
-------------------------GAGAGGTTAATTATTTCATTTTAGAAGGAAGAAACTGTG-CTTCTGAGAGGTTAA
GATCTTCCCACGTTCTCACAGAAAGTAAGTGGGAAGGCAAACATGAGAACATTTTGTTTGCCTCCAGGGTCAA-------
--------------------------------------------------------------------------------
--------------------------------------------------------------------------------
--------------------------------------------------------------------------------
-------------------------------------------------------------------------GAGTTTG
CACTCTCCTTTCTCAGGATCCCCAAGAAGAGAGTTCAAGTGCCTCAATGGGCTGAAATGATAGGAAGTCAGGGGTGTTCC
ACGGACACAAGCTCAAAGGTTTGGAAG------TATTTTTTTTTTTTTTTT-AATTCTTAGGATGGAGAACGTGACCTTG
AAGAAGCCAGAAACTTTTCCAAAAAATCAAAGGAGAGTGTTTCGAGCTCCTGATCTGAAAGGAATGCTAGAAGTGTTTAG
AGGTGAGGAGAGCTAGATCAACAACAGGGTTATGGAATTCAAGTG------GTGTTAGGGTGCTAAATAGGGAAGAGGGT
GCAGTTTCCAAATATGGATAGAGGGGATAGGGGAGGATAGATATTGTCTGCTGCTGATGGGATTATATTTAATGGGAAAT
GGCTAGGTGGCTGTTTCATCTCGTCATTCAGCAATTTACTGCCC---TACCATAGGGCATACCTACTCTTTCCCTAATCT
GGAGAGAAAATGAATTTCAGTGCTGACTCCTTT-GTTTGTATTCAATATTGTGCATTTTTATCATTTCAGAGCTGACAGA
TGTCCGACGCTACTGGGGTAAGGAGAAGTCACATTATCATAAGCCACCCTGCGGCTTATCA--------TTATTATTATC
TTTATCTTTTA-GAATTTTATGTT--------------------------------------------------------
--------------------------------------------------------------------------------
--------------------------------------------------------------------------------
--------------------------------------------------------------------------------
--------------------------------------------------------------------------------
--------------------------------------------------------------------------------
--------------------------------------------------------------------------------
--------------------------------------------------------------------------------
--------------------------------------------------------------------------------
--------------------------------------------------------------------------------
-CTCTATTAGG-CTCATGTTTTAAGATTTATGATTCTCCTTCCAAGACACACATAACTTACCCCTCCT------------
----------TATAACTTCTAAACAAGGTTCCTCCCAGTTTTCTCTCAAGTCTTCATCAAGATTTCTCTCATATCACA-A
ATAAAGT-ACATTATATCCCTTAGCTGACCTGTTAATTTTTCTACAGTTGATGTGACAGTGGCTCCAAACAACATTTCAT
GTGCTGTCATTTCTGAAGATATGAGACAAGTGAGCTCTCCGAAACCACAGATAATATATGGGGCACGAGGGACAAGATAT
CAGACATTTAT------GAATTTCAATTATTGTACTGGCATCCTGGGCTCTCAAAGTATCACATCAGGGAAACATTACTG
GGAGGTAGACGTGTCCAAGAAAAGTGCTTGGATCCTGGGGGTATGTGCTGGCTTCCAACCTGATGCAATGTGTAATATTG
AAAAAAATGAAAATTATCAACCTAAATATGGCTACTGGGTTATAGGGTTAGAGGAAGGAGTTAAATGTAGTGCTTTCCAG
GATGGTTCCTTCCATACTCCTTCTGCTCCTTTCATTGTGCCCCTCTCTGTGATTATTTGTCCTGATCGTGTTGGAGTTTT
CCTAGACTATGAGGCTTGCACTGTCTCATTCTTCAATATCACAAACCATGGATCTCTCATCTATAAGTTTTCTCACTGTT
CTTTTTCTCAGCCTGTATTTCCATATTTAAATCCTAGAAAATGTGGAGTCCCCATGACTCTGTGCTCACCAAGCTCTTGA
ACCTTCTTACACACTCAGCCCCTTCTGTACAGCACCTCTTGTCCAGGTGCATCTCATACACCTGAACTCATTTGCATCAT
TTTAACCATCTTTTCCTTGCTGTCTCCCTTCTTTCTATTTGAACGTCCTTCACTCATCAGTAAAATGTAATAATTGCCTT
GTGCCATATTGTCCCCAATATTTTATTGACATTTGATAGCAATTTTTTT-CATCATTTTCCGTACTCCTAAGGAAAACTG
ACCTATACCTCATAAAATGAGACCACTATTTAGGTATTACTTCTGCCAGATATTTATCACCCAATTGCCTCTGACACTGA
CTAAGAAGATGAAGAAAAGCTTTTCAACAGCCTTTCT-----ATATCATCGTGTGATAATTGTTCACCAATGAATGAGTC
CTTAGCCCTGTGTCAGTTTACCCTCGATGCCCTTATTTGT----GAGTTAAAGAGAAATTATCATAAATGGCATACTCTT
AAGTATAGAGGTTTTGTATCTAGAGGGTCTGAGTTCAACTCCTGT------------CTCTCCATATACTAGCAGTGTAA
CTGTGAATAACATACTTAAATGGCTGTGCTTATTTCCTTTTCTTTTCTTTTTTTTTTTCTTTTTTTTTTTTTGAGATGAA
GTTTTGCTCTTGTTCCCCAGGCTGGAGTGCAATGGCACGATCTCGGTTCACTGCAACCTCCACCTCTCAGATTCAAGCAA
TTCTCCTGCCTCAGCCTCCCAAGTAGCTGGGATTACAGGTGCCCACCACCACCCCTGGCTAAATTTGTATTTTCAGTAGA
GACGGGGTTTCCCCA-----TGTTGGTTAGGCTCGTCTAGAACTTCTGACCTCAGGCGATCCGCCCGCCTCTGCCTCCCA
AAGTGCTGGGATTACAGGCGTGAGCCACGGCACCCA----GCCTGTGCTTATTTTCTTAAAATAATTTTTGTATTAAAAA
CTTCACATTAAATAAGTGCTAATGTTTTATTGCATAGTAGGGTGACTAGAGTTAACAATAACCTATTGCATATATTTTGA
AATAGCTAGAAGAGAGGATTTTGAA------------------------AGTTCTCAACACAAAGAAATGACACGTATTT
GAGGTGATGGATATGCTAATTACCC---TGGTTTGGTTATTACACAATGTATACATGTATCAAAACATCACACTGTACCA
CATAAATATGTACATTTATTATTTGTCAATTAAAAGCAAAATAAAACAAAAAACCTTCAAATAATACTTTGGATCATTGT
GAAAAAATAAATTCCTGAAGTATAAAGCATCT
>Nomascus_leucogenys_TRIM5
GCAGTTCCTCT-AGGAAAATTCCTGTGTGCAGATCAGG-CCCGTGGATTGGTGAGTGAATCCTAACCATGTCTT----CC
CTGGCCTGCCTTCACTCTTCTCCCCAGAATCACCGCTTCTGCACTGGTGTCTGAAGGTGTATTGAGTGATTTTGTGGAGG
GCAGAAGTAGGAAGTCTTTGGGAGAAAACTGAATTTACCTTGGTGAGTTTAACTTATCTGAAAAGCTGTGCGGGGATGGG
GAGAAGACACAGTTCACAGACTTCCTGCTGCCAGAGCTGACTGAGGGGAACAGAGCCCCCTGGCGGGCAGGCAGATTTGA
AAGAAGGGAGAGCTTT----------------------------------------------------------------
--------------------------------------------------------------------------------
--------------------------------------------------------------------------------
--------------------------------------------------------------------------------
----------------------------------AAAGTGAAGGGCTTTGTTTCCTGGAAGGCTGGTTATTTTTCCATGC
TGACTCTCTCCCCATCCCCTCCCTATTCTATAATTTTTAATTGAAGTTTGCTGTAGAGAGCCAGAATTCTCT--TTCAGT
ATCTTCTCCTAACAA---GGGCAAAGACAGGGGCCTTGGAATCCTAATGATTTAATGCCTATTAGTGTACTAATGTAGTG
TTTCTGCGTAAATCTACAGGTCAGTTCTCATCACCTTGGCCGGTCTCTGTGACATCAGCCTTGATGGTGTGACAGCTGTC
CAGCTCTGTAGTCCTGTCATTGTCACTGGTAAACGGAGTTCTTTCCCTAGTTCATATTGGTTACAAAGATAATGGGAAAA
AA-GGCAAGCAGGTTTTATTTCTTGCTAGGAATGCAGAATAAGAGAGCACCTTCTCTAAAGCCCCCTCCCCCAAAACAGT
GGAAAGCA-TTGGCTTTAAAAGAACTGTGTATGGGGAGAGAAAGGAGTGTTAGCCTACAGGGTGGAACTCCCGTTGTGCC
ACCTCTGTTTATAAACAC--GTCTTCATACTGTGTCCGGAATTGGTGGATTCTTGGTCTCACTGACTTCAAGAATGAAGC
CGCGGACCCTTGCGGTG----TTACAGTTCTTAAAGGCGGCGTGTCCGCAGTTTGTTCCTTCTGATGTTCGGATGTGTTC
AGAGTTTCTTCTTTCTGGTGGGTTCACGGTCTGGCTGGCTCAGGAGTGAAGCTGCAGACCTTCACAGTGAGTGTTACAGC
TCATAAAGGCAGTGTGCACCCAAAGAGTGAGCAGTAGCAAGATTTATTACAAAGAGCGAAAGAACAAAGCTTCCACAGCG
TGAAAGGGGACTGGAGCAGGTTGCCACTGCTGGCTCCGGCAGCCTACTTTTATTCTCTTATCTGGCCCCACCCACATCCT
GCTGATTGGTCCATTTTACAGAGAGCCGAGTGGTCTGTTTTGACAGGGCGCTGATTGGTGTGTTTATAATCCCTGAGCTA
GACACAAAAGTTCTCCACATCCCCACTAGATTAGCTAGATACAGAGTGTAGACACAAAGATTCTCCACCTCCCCACCAGA
CTAGCTAGAAACAGAGTGTCGATTGGTGCATTCACAAACCCTTAGCTAGACACAGGGTGCTGATTGGTGTGTTTACAAAC
CTTGAGCTAAATACAGACATCTAGCTCGATTGGTGTATTTACAATCCCTTAGCTAGACTTAAAGGTTCTCCAAGTCCCCA
CCAGAGTAGCTAGATACAGACTGTTGATTGGTGCGTTCCCAAACCCTGAGCTAGACACAGGGTGCTGATTGGTGCATTTA
CAATCCCTTAGCTAGACATAAAGGTTCTGCAAGTCCCTCCCAGACTCGGGAGCCCCACTGGCTTCACCCAGTGGATGCTG
CACCAGGGCGGCAGGTGGAGCTGCCTGCCAGTCTCATGCCATGC-----GCCTGCACCCCTCAGCCCTTGG-TGGTCAAT
GGGACTGGGCACCGTGGAGCAGGGGGCGGCGCTCGTCTGGGAGGCTGGGGTGGCACAGAAGCCCA--TGGAATGGGGGAG
GCTCAGGCATGGCCGGCTGCAGGTCCCGACCCCTGCCCCAACGGGAGGCAGCTAAGGCCTGGCGAGTAATTGAGCACAAC
AACTGCTGGCCCAGGTGCTAAGCCCCTCACTGCCCGGGG-------GTCGGCCGGCCACTCCGAGTGCGAGGCCCGCCAA
GCCCACGCCCACCCAGAACTCCAGCTGGCCCGCAAGCGCTGCGTGCAGCTCCGGTTCCCCCTCTCGCCTGTCCCTCCACA
CCTCCCTGCAAGCTGAGGGAGCCATCTCCGGCCTCAGCCAGCCCAGAAAGGGGTTCCCACAGTGCAGCGGTGGGCTGAAG
GGCTCCTCAAGTGCCGCCAAAGTGGGAGCCCAGGCAGAGGAGGCGCCCAGAGCGAGTGAGGGCTGCAAGGGCTGCCAGCA
CGCTGTCACCTCTCAATACAACCCAGGCACAAAAAAGGGTGGAGATTTTCTTGTTTGGTGTCGAG------GGGGGGTAA
TTTAACACTCTAGTGATATGTTAATGATCTAAAGGCAATTAGGGATTGTCAGTTCCAGTTTATACGCTGGTTTGGAGGTC
TAATTTCCCCCTTGGATCTGGTCAGGGGTCAAGATCTGGACCATGCTGGGCAGTCTGGCTTCTT--TAAGCAACTTTATC
TATAAATAAAGGGAATAAATAAAAACGTTAAGAAAAATAACTTTCCCAGTTATTTCATCAGGGCTTCCCTGGTGACAGCA
TCTGTTTGCCTCTACTAGGGCACCAAGTCCAGACTCAGGGAACTACTGGATTTTCTTAAAAATCATTAACCTTGCTCCTC
CCTCTCCTTGGGCCATATCTGTCCCCCAAAAGCAGAGCTTAGTCGTGAGATACGAAGAGCAGGAGAAGCATGTGGAAAGA
ATACCCAGAGGCGGCACCTTTTCTAACTTTTAATAAACAAAATGAGTACTTGTGTAAACCAAAAATAAAATTCTGTAGCC
CCCAGCCACCTGAATGGACTTTCTCCTCAGCCAGGCTGCTCTTAAAATGTAACCTGAAAGACTGATTCAGGCCATGACAG
GAAGTGGGGGTCAGACATGACTCAT------TCTCCAGCACGAACTTCAACATAGATTCTAAGTCTGGTAAGAAACATTT
CAATCTATTCTCTCTGAAGCCTGCTACCCGAAGGCTGCATCTGCACAATAAGAACTTTGGTCTCCATAGTTGCTTATCTG
AACCTAAACATTTCCTTTCTTTTGATCCCAGGTCTTTAGATAAAGACAATCGTCAACCAGAGTCTTTCTTAAATGTATTT
GATTGAAGTCTCTTGTCTCCTTAAAATATATGAAACCAAGCTACGCCCCAACCAGCTTAGACACATGTTCTTAGGATCTC
CTGAGGGCTCTGTCATAGGGCATCGTCACTCATATTTGGCACAGAATAAATCTCTTTAAAATATTTTACAGAGTTTGACT
CTTTTCATCGACACTTGGTTGAT---AACGATATCAGATGTCAGAAGTGGTGTGATAACAGGATCCTGAGACACGTGAGA
GAGGGAGTCTCTCTCATGGGGAGCCTCTGTATTCAATCCCAAATGTCCTTCCCATGGAAGGTATAGCTGCTGCACTTAAG
CTAGTTCAAGCTTATATGGAAGACTCCAGGCAAAACTCTTTTCTCATCCCAACTTCCCTTCATCTGACCAAATCTTACTG
CCTCAAGGTTGATTTTTGGAGATTTCACCTGTGCTTCATATTTCTTGTCCCTGCTTCTGGTGATAAATCAGTGCTTGGCA
CCCATCTTCTGAACTCATACAGAGTATCTTTCTCATGGCATTGTAAACCAAATAAACGAATGGAGGGGGGCCTCAATCAA
TTTGGATGTTTATTTTGCCAGGGTTGAGGACATGCCTAGGAAAAGGGAACACAAAATCACAGGAACATCATCTGTGATTC
ATGCTTTTTCCAAAGAGGGTTTGAGGAGTTCAGTATTTAAAGAAGAAAGAGAAAAGAAAAAAATGGAGGAGAGTCGATAA
AAGAAGCAAAACGTTACATTCTTTTGAGGCTTTAGCTAGCGATGGCTGAATCCATAATTTACATGTTAAAGGAGGGCTTG
GAGGAGTAATCAATTATGCACTGTCTCCCACTCAGTGAATCTGCATTTTTACACAAGATAAACAG--AGTAGCAGAAACG
GTCAAACATCCATTTGTCTCAGGTGAGCTGAGGGATGATTTATCCTCTGTCTTTGTCCCATACTAGTGAAGATAAGCTTG
CTAATTGACATTGTCAGGGTGAAATTCAACAGATCT--GTTTCAGAGTAAAGACCTTGGGGCCCACAAGAAATTTCCTTG
TGAGCAAATTGTGAGGGAAGCCACCTGGGAGGTATGTGGCCTTCTATCTTTGCAGCTAT-------------CTATTTAG
GAACAAAATATGATGGAAGGCAGTTTTGCGTGGCCCAATTCCCAAGCTTTAGTATTCCCTTTGACATAGTGAGTTTGGGG
CCCCAGATTGTTATTTTCCTTTCACACTAGATATTTCAAGATTTTTAGAATTAATTCAATAATCT---CCTTTTATTTTT
TTTATTTTGCTGGTATGATGGGGAGTACACCATTAAATGGTTGTGATATTGTGAAATACATTTGGTTTTCATCACTGTTT
CCTAGCATACATCTCCTAAAATTCTTGAATCTGCAAAGTGGTAAGTGTCTTTTTGTATGATAATTAATCAGTTGATGGCT
GGCAGCCCCT-AGTAGCTTCAGGAAATGGGGGTCCTCTCCAGAAAGACTAACGCAGGAAATGAGGGTTGGGACTTTCAGC
TCCACCCACCAACCTCTGGGGAGAAGAGAGAGGCTAAAGGTTAAGTCGTACTGGTAGCCAGTGATTTCATCAATTATATT
AACGTAATGATGCCTCCATGAAAACCTAAAAGGACAGGGTTCAATGAGGTTCCAAATAGCGGAACACTTGGCGGTTTCTG
AAGCCTAGTGTGCTTGCTGAGGGCAGGGAAGCTCCATGCCCCTTCTCTCATGCGTCAGCCTATGCATCCATCTGTATACT
TTGTGATGTCCTTCATAATGAACCAGTATATATAAAGAGGAGAACCCTGATTTATAGCCAGTTAGTCAGAAGCACAGGTA
AAACAACCTGAGGCTTGCAATTGGCATCAGAAGTTGGGGGGGCAGTCTGTGGGACCAAGCCTTCAGCCTGTGTAATCTGA
TGCTATCTCCAGGTATGATGTCAGAATGGAATTAGAAGACACCCCGTTGGTGTTTGTTGCTGAAAGAATGCTTCCTTCTA
-TTTTGGGGAAAATCCCTCACAAATTTGACCCCAGAAGTATTCTGTGTTGCTTGTTTACTGAGTGTATAGGCTATGCTGA
GTTTCTGTGTTTCCTACACAGTACTATGGATACG----------------------------------------------
--------------------------------------------------------------------------------
--------------------------------------------------------------------------------
--------------------------------------------------------------------------------
--------------------------------------------------------------------------------
--------------------------------------------------------------------------------
--------------------------------------------------------------------------------
--------------------------------------------------------------------------------
--------------------------------------------------------------------------------
--------------------------------------------------------------------------------
--------------------------------------------------------------------------------
--------------------------------------------------------------------------------
--------------------------------------------------------------------------------
--------------------------------------------------------------------------------
--------------------------------------------------------------------------------
--------------------------------------------------------------------------------
--------------------------------------------------------------------------------
--------------------------------------------------------------------------------
--------------------------------------------------------------------------------
--------------------------------------------------------------------------------
--------------------------------------------------------------------------------
--------------------------------------------------------------------------------
--------------------------------------------------------------------------------
--------------------------------------------------------------------------------
--------------------------------------------------------------------------------
--------------------------------------------------------------------------------
--------------------------------------------------------------------------------
--------------------------------------------------------------------------------
--------------------------------------------------------------------------------
--------------------------------------------------------------------------------
--------------------------------------------------------------------------------
--------------------------------------------------------------------------------
--------------------------------------------------------------------------------
--------------------------------------------------------------------------------
--------------------------------------------------------------------------------
--------------------------------------------------------------------------------
--------------------------------------------------------------------------------
--------------------------------------------------------------------------------
--------------------------------------------------------------------------------
--------------------------------------------------------------------------------
--------------------------------------------------------------------------------
--------------------------------------------------------------------------------
--------------------------------------------------------------------------------
--------------------------------------------------------------------------------
--------------------------------------------------------------------------------
--------------------------------------------------------------------------------
--------------------------------------------------------------------------------
--------------------------------------------------------------------------------
--------------------------------------------------------------------------------
--------------------------------------------------------------------------------
--------------------------------------------------------------------------------
--------------------------------------------------------------------------------
--------------------------------------------------------------------------------
--------------------------------------------------------------------------------
--------------------------------------------------------------------------------
--------------------------------------------------------------------------------
--------------------------------------------------------------------------------
--------------------------------------------------------------------------------
--------------------------------------------------------------------------------
--------------------------------------------------------------------------------
--------------------------------------------------------------------------------
--------------------------------------------------------------------------------
--------------------------------------------------------------------------------
--------------------------------------------------------------------------------
--------------------------------------------------------------------------------
--------------------------------------------------------------------------------
--------------------------------------------------------------------------------
--------------------------------------------------------------------------------
--------------------------------------------------------------------------------
--------------------------------------------------------------------------------
--------------------------------------------------------------------------------
--------------------------------------------------------------------------------
--------------------------------------------------------------------------------
--------------------------------------------------------------------------------
--------------------------------------------------------------------------------
--------------------------------------------------------------------------------
GCTCT---GACTGTAGGAACACCA-GGTTTTTGGTCTTG-CGCCAATAGGATTAATGACACGGACACACGTGGAGTGGTT
TTAAGGAGCGAAAAGTTTAATAGGCAAGAAGGAAGGGAGGAATGGAAGGAAGGAAGGAAGGAAGGAAGGAAGGAAGAAAG
AGAAAAAAACAGCTCCCCCATAGAGAGACAGGGGAAGGGGGGATCTGACAAAGAGAAAAACCTCATGTGCAGTGGAAAAG
TGGCTGCTTATAGGAGGAGGCTGGAGGAGGTGGTGTCTGATTTGCATAGGGCTCAGGGGATTGGTTTGACCAGGCATGTC
ATTCACGTGGCTCG-TGAAAAAACTAGCCCTCTCACCCTAGCCTTTCAGTATGCAAATGCAGGGCACCACAATGTTTTAC
ACATG-CGGGGATATCTGGTGGCAGCCATATTGCCTGGCACATGTTGGGGCAAGGAAGAAGATGGTGGGAATCACCATGT
TTGGGTTGGACCCAGTTTCTAATGGCCAGTATTTGCATATTAAAGCTTGCTGGCCCAGCTCTAAGAGCCGGGGCTTTTCT
GCTAGACAAGAAATGTTTCTGGAGCTGCTTTAAAACAAATGAAAACTTCCCAAGCACCCCTTTCCCTCTCTATATGCCTA
AAACAATTTCTTAATAACTCCTACAACAGTATTAGATGATATTGCTTAGCAAATGAATCTCAGTACAATTTCATTTTCCC
CACCTATGTATGAAAGGTGATGCCTTCCCATATAACATCAGTAATTTGCAGCTATATTATGCTTAGAGAAA--GTTTTAC
CCCGGTCACAGGAGAAGAAAATTCTGTCTATAATGCATATTGCTTGGATTTTACAAAAACTTATTATTGTCTTATAATGT
CTTTGTTGCTTGTCTTTAGCTGTCACCTCTAGGACATGTTGGGTTTGCATTCTCATGATCTCAGATGTCAGGAGAAGGTC
CATGTGTAAGGTGCAGTCACCTGACATGTATGGCAGGTAGCTGACCTGAGAGATACCAGGCAGATAAT---CGTGTTCCC
GTCTCAACCTCCCTGACTGCTGTGCGGCCCTCGGGTCACTGCTGAGGTAGTGGTGGGGTTAGCCGCATGTGTGGAAATTC
TGGTTCGTCTGCATATTCCTCTTTCTATGTCTGTTATGGCATCAGTTACTTTGACATTGGATCCTTGTAATCTCACATGA
AACATAATTTTCACAGCCGCATGGCAGAAGGCAGTCTCCGTT---CCTCCCTCCCGTAGGCTCTTGATGCATCTCAGTGC
TAGTGCAATTTTTAATGGAATAAAAGATAAATGGAGTCCTCACTCTCATGTTTGGATCACAACTTGAGTCATAAACAAGG
CTAGACATTATCATATGATTTAAACCTTTGATCTTGCTATTTATCAGAGCCTGATACAGGCCAACGTCCCTGAAGCATAA
CACTATATGTCCTTGGCCCATTTTCAGTATCTG-TACCACTGGATGGATTGCGCCTCCATCCCACCTTCATTCAGCCTTG
TTCTTTATGGCCTTCACAGATGATGGGAGGAGTGTA-----------GGTCTGAATTTATCTCCATATAGCCTTTATAAC
ATTTCTTTTCCTTTTTCAGAACAAGGGAAAGACTCATCAGCTGTCTCACAGTGAAGATCTTTGTTTTACCATGAACCCTT
GACAGCCAGCAACACATCAGTATCTATTAAGGTCTTCTCTTACTTTGTTTTTAGCTTTACAGCTCCATTTACTTGGAACT
CCTGACAGCCCTTGATCCTAGATTGAGGCCACAGGGTCGTTACTGAACCCAGGTCTATCAGTCAACATCTCTGAGCCACC
ACTCTGTGATACTTCCCTGACTGAACACCAGCAGCAGTTTCCAATCTGGTTTGCCATTTCCCTTGGGGGACATAACAGCC
CTAAACTAGCCAGGTTCGTGTAGTTCAGCCAGGGT-ATGCAGGACAGAAGAACCATGTGGCACAGCTTCCTCAGATGAGT
TCTCAGTGAGAGTCCCTAGGGTAGTACAGGAGGTATTAT---CTCTATCATCTGAGTTTTCTAAGAGATGAAACTGGCTG
GATGTGTGTGAAACTGCTGTAGGTTAGATAAGCCTAGTACCCCAAAGGACTGATTATCTTGTGAAAGCTCATGAGAACAG
TTCTCAGGGACTCAAAA--GGGACATATCTGGTTTTGTGGTGGAAAATGAGGTCTGTTCCTACCAACTGGAATTTAAGAT
CTATATACAGCCTTCCTAGTCCAAATGTGCTTTATATATCAGCATATATTTACTCTCAATAGATTATTGTACT-----CT
TACTATATACTTCTATTACAGAGTATATTATTATCAATAACAGCCTCATGTAGGCTAGCAAGACAGCTGACATTTCACTC
TATTGTAACCCAATAAATTTCCTAGAAGAAAAGAATACTAGAAGGATAAGCCAGTATCATCTTTACAGGAGAAAAGAGCT
CAAGCCTGATATTAACCCTT-GGTCCCACATGTGTAGTCTAGTTCTCAGTACTGTTCCTTTTATCTCGATTTCTCTCTCA
CTCTCATTTGCTCTCCATTTCCTCCATCACCTTGTCCTGCAAGCTGTCAACAGCTCTCTCCTATATCCTAACTGATCTTC
CCACTTGCACACTAGATCTGTCTAACCTTTCGCAACCCATGCTCAACGTTAATTGTGTCCTCACTTTCTTCTGCTGATTG
AGAATGATAACTTTAATGGACGGTTGACACTAATAATTTTTCCTCGCCCTTGTTTTTT-CTTTAGAGACGGAGTTTCGCT
CTTGTTGCCCAGGC-------TGGAGTGCAATGGTGCAATCTCAGCTCAC-GCAACCTCTGCCTCCCGGGTTCAAGCGAT
TCTCCTGCCTCAGCCTCCCTAGTAGCTGGTATTACAGGCATGTGCCACCACGCCTGGCTAATTTT-GTATTTAT-AGTAG
AGGCGGGGTTTCTCTGTGTTGGTCAGGCTGGTCTTGAACTCCCGACCTCAGGTGATCTGCCCGCCTCGGCCTCCCAAAAT
GGTGGGATTACAGGTGTGAGCCACTGTGCCCAGC-------------------------------CTAA--------TTT
TTCCTCGCTCTTAAGAAAGAATTCCCAGATGTTATGTCATTTGGGATGTGTCACATTTTCTGGTCCCTGTAATACTAAAA
GTCTAACAAGTCTGTGCACAGTAGGCACCATAATAGGTCTGTGCACAATAGGAAACTGGCAACTTAAAACGCTTAGATGT
TGCATCTTCCATGAGCAAGTTATTCATCTATGTAACTTCTTCTA-CTGATACATGTGCCCTATTCTCATCCTGCGTTTTC
TCATAT----CACGCTTCAGTTAAACCTTTATGTTTTCAATTAGTAATTCTTGGAT-AACCCTTGGTTTGCTTCATTATT
TGACTTCCCGAGAGCACTTACCTGTCT--AGTAGTATTCATCACATCTGCCATTTC--GTATATATATGGCTGATCATTT
AGTTTACTATAAGTTTTTAGGTGAACGCCAAGTTTATAGTAGATTAAACACCATGTTGATCTTTGTCTTGATTTTGGTCC
CGTTGCTAGCATATAATCAGTCTTCAACAATAATTTGTCAAATTGTGGCAGGCCAAGTTTCACTAACACAGGCCTCCATA
ACAACTGTTTCAGCACTAACT----G-TT-AGTTACTTTTTTTTTTATATTTTTTATTTTTTTTTCAGACAGAGCCTTGC
TCTGTTGCCCAGGCTGGAATGTAGTGACGTGATCTCGGCTCATTGCAACCCCCACCTCCCAGGTTGAAGCGATTCTCCTG
CCTCAGCCACCCAAGTAGCTGGGATTACAGGCACCCGTCACCAAGCCCAGCTAATTTTTGTATTTTTAGTAGAGATAGAA
TTTCACCATGTTGGCCAGGCTGGTCTTGAACTCCCTGCCTCGTGTGATCTGCCTGCCTTGGCCNNNNNNNNNNNNNNNNN
NNNNNNNNNNNNNNNNNNNNNNNNNNNNNNNNNNNNNNNNNNNNNNNNCTGAAGCCAGG--------CTCATGCCTGTAA
TCCCAGCACCTTGGGAGGCCAAGGCAGGTGGATCACAAGGTCAGGAGTTCGAGACCAGCCTGGCCAATATGGTGAAACCC
CATCTCTACCAAGAAAAAACAAAAATTAGCCAGGTGTGGTGGTGCGTGCCTGTGGTCTCAGCTGCTCGGGAGGCTGAGGC
AGAGGAGTCACTTGAACCTGGGAGGCGGAGGTTGCAGTGAGCCGAGATTGTGCCATTGCACTCCAGCCTGGGCAACAGAG
CGAGACTCCGTCTCAAAAAAAAAGAAGAAAAAATATTAAAAGCTGATAGAGCTAGGGCCCTTATACAAAGGCTGGAATGT
AACAGAAGCCCACCGAGAGTTTTGCCCAGGCCTTTCCTGGGCCTTGAAGCATGTCAAGATAACAAAGGAATCGATT--AG
GACCTGTTTAGGATTAAACAAGTTTTAT-GGGGGTCTGAAGGAACTCCC-AGGCCTCCACAAACAAGTTTATTGGGGGTC
TGAAGGAACTCCCCAAACCTTAATGATTTAGCAGGAGAGACAAGATAAGGGTAATTACCCCAGCACCTGGACCCATCTAG
ATTACGTAAATTTACTGAGGCGCCAGAGGAAGGTCTTTAAAACTCAGACCTTAGTTATAGATTAGAAGAAG---TTA-AC
TACTTATGTTTTTAGATGAAT---GCACACCTATACGTAGACATATAGCTTAGAAGGTATATAAGCTCTGGAAAACTTTG
TAATTTTGAGTTGATCTGGCGATATTTTCCAGGCTTTCTCCCTGTACG------CAGAAATAAAAACTCCCTTTTTTCCC
GGTAAATCTGCATCTCGTTATTGGGCCGTGAGAAGAAGCAGCC-GACCCTCCGTTTGGTCCGGGAACAAAATCATCTCAT
CTAATATTTTGAGACTTCTCTGTCAAGACTGATATCCGTTTCCTCTGTGTTTCTAGTTTTCAAGTCTCCAACATGTGTGA
TCCACTGAGTATTTCTCTATCATCACTCTCTACACCATGT----------CTATACCTTCAGGCTCCAATAAATGTCCTT
GGCAAACTTTCAGGATGAGAGTCCCCAGAACCTCCCAGCTGTTGTGGATTCCTCTACTTCCACACCCCAATTGCTCTGAG
TATTAATTGGATATATGCCATTATCTCCATTTGTCATTGATTAACCAAAAGAGTAGCAAAGAGGCCAGTGAAAGAGGACC
CTGAATACGGGGTCATCTCAGGTCACCATATTGAAGGTAAATAAATTTTGTAAATCAATTATTATGTCTATTTATACATT
TGATGAAACA--GTCATTCACTC--TGCTGATAATAAGAGCAATCATTGCAAATGTACAGTGAGTGGTGAGATTTGTTAC
ACTGCACATAAGGTAGTCAGAGCAGGTATTTTTGATAATATAACATGTAAGGAGAGAATTTAATAAAATCATACTAACAT
CAGAGAAACAGTTCATGCTGAGAGAAGAGCAAATGTGAAAGCCCTGAGGCATAAATGGTTTGGTGATTTTAATATCGAGG
ATGTGTTTTGGCATGGGAAAGAAAAGCCAGGAGAGATGATGGGTCACACAAAGATCTTGGTAGAAAAGACCTCAGTCTGT
TTTCTATTCATTGAAAGTAAAGAAAAATGATAACCAATGCACAGATAAGAACAGAATTTGTCATATGACATGAACTGGGA
GTAAAGTATTTAAGGTGATTATGAAAAGCCCTTATTACCAGGTAACCAAACACCTTTTCTTATTT-CTCCCCGTTTTTTT
T--GTCTTTAATTATTTTCATCCTGCCCATTTTCTAATTGTGCACAATCAATATCCTTTCTATTT---CTACTTTTCTTA
CTTAGTCCCATTTTAACCTTCCCAATCATGCAGGGATCTGTGAACAAGAGGAACCTCAGCAGCCAGGACAGGCAGGAGCA
GTGGAGTAGCTACTATGGCTTCTGGAATCCTGGTTAATGTAAAGGAGGAGGTGACCTGCCCCATCTGCCTGGAACTCCTG
ACACAACCCCTGAGTCTGGACTGCGGCCACAGCTTCTGCCAAGCATGCCTCACTGCAAACCACAAAACGTCCATGCCAGA
C---GAAGGAGAGAGAAGCTGCCCTGTGTGCCGGATCAGTTACCAGCATAAGAACATACGGCCTAATCGGCATGTAGCTA
ACATAGTGGAGAAGCTCAGGGAGGTCAAGTTGAGCCCAGAGGAGGGGCAGAAGGTTGATCACTGTGCACGCCATGGAGAG
AAACTTCTACTCTTCTGTCGGGAGGACAGGAAGGTCATTTGCTGGCTTTGTGAGCGGTCTCAGGAGCACCGTGGTCACCA
CACGTTCCTCACGGAGGAGGTTGCCCAGGAGTACCAAGTAAGAGACTGGGATGGAGGGAAGAGAGGGCAGAAAATGGGAC
CAGATGGAAAATTTTCACTTTGCCTTTGACATTAATTGCCTTGTCATGATAGACCTGAGGCCTGGGATTATTTTTTT---
----------------CATGCTATGCTTAACTTCTGAGGATTTAAGGACATTTTTTT-----------GCATTTCACCCA
ATTACAGGAGAATAATCCTAGAGTATATATTCCTGGCCAGGAGTAAATATTTTGTACCTTGGGTTAGATGGGTAGAGATT
TGGTGTCCAAGAAAAGCTCTGATTACCCCTTTCAGCAGGAGAGTAAC--GAGTGGGTTGAGATGTAAGTTCTTTCCTTGC
TGCAGGATCAGTTTTTTCTTCTAGGACAAAAAGAATCAGTCTACTCATGGTGAGGAGGTGGGGAGGTCTATTACCTGAGA
TGTAGGGAGCACATTCACCAATGTAAGTTTTCTTCCAAGTCATGGATTCTCATTGCCATTCTCACAGTTTCTGCAAATTT
GTTTCTTCTGAGATCAACCTGATTTATTTCATGTTTATACTCTATCTA----GGTGCTGGGAAACCTCATAGCTTGACTA
TGGTGTGATTCCTTTCTCACAGATGAAGCTCCAGGCAGCTCTGCAGATGCTGAGGCAGAAGCAGCAGGAAGCTGAAGAGT
TGGAAGCTGACATCAGAGAAGAGAAAGCTTCCTGGAAGGCAAGAGGATGTGGTTCCCGAAGGAGTTAGCTAGAAATCTGG
GCAGGACCATGGGAAGGAGCTTTCTTCCTCTTTATTCCCTGACACTTGATAAGTCCAGAAGTCATTTGATTAGTCCTCTT
CATCCTTTCCCTGATGGGGTGTGGTGGCTGGGGAGTGAATATGTCACATTGAACACAG-------TAGGGAGCTATTTAC
TTGAAGGATCTCTCTGGTGAGGATGGCTAGTGAATCCTGCATTCTATTTTTGTGCTACCTTTTGAGTCCGTGACT--ACC
TGGGGAAGACATTTGGCAATGGCTCATGATCCTGTCCTCAGTGTTCAACTTTTGGCAGGGAGTTTGAACTTGGGCTGAG-
-AAGTAATACAGGCAGGCATGAGTGTCCTGCATAGCTGTGTGAAAGGTAAGCTACATCAAGGTAACCCATTTTGATGCAG
GATGAACCT---CAA-------------GGTCATTGTTTTAAAATGTCATGAAGGAAAAGAAA---TAGGACAAATCAGC
TTTCCTAAGACCTACTCTCCTGCTACTATGTCCCCTCCTTGTGAGAACTCTCCAAAAGAAACAGCTCTTTTTCTGGCTAA
CAGCCTCTGCCTGGTAGACTAAGTGCCCCTTTCTCTTTTCTTATCTCTGAAGACTCAAATACAGTATGACAAAACCAACA
TCTTGGCAGATTTTGAGCAACTGAGACACATCCTGGACTGGGTGGAGAGCAATGAGCTGCAAAACCTGGAGAAGGAGGAG
AAAGACGTTCTGAAAAGGCTTATGAAGTCTGAAATTGAGATGGTGCAGCAGACCCAGTCCGTGAGAGAGCTCATCTCAGA
TCTGGAGCATCGGCTGCAGGGGTCAGTGATGGAGCTGCTTCAGGTAAAAAGTGGAAAGAAGCCTGAGCACTGAGATTAAA
GAAAAGTGAAGGCTATTTCCTTTTCTGTGTTGCTGTGCTCTTTCAAATATTAACAATGTTCTCTGCAGGACCACTTTTCT
GAAT------------------------------CAATTGCTGAAGTTATAGGAATAATTGAATGTAGAAGTAGCAAGAG
ATAATCCCATTTTTATTAATTTATCC-AGAGCAGTAGAAAAATTTGGCATAGTAGAGATGATCAATTAGCTCTAGTCATG
TTTGATAGGTTCCTGTGCTCTGTATTCTAGTGTTGAG-ACTTATCAGTGCAGCTTTTCATTGCTCAGCTTAGCCACTGGC
AAACAAATACACGTCAAAATACCAGATGC--TTTTTATTTTTTTCCTTCATGGAATTAATTGAGA-CTTTTTCCTCTTTT
TT-AATTTT-CTGAAAAAAA-TTAAATAACTGCTATCATTTCTTCTTTATATGCTCAATAGAATTCACTAGTAAA--GGC
TGGGCATGGTGGCTCACGCCTGTAATCCCAGCACTTTGGGAGGCCCAGGCAGGCCGATCAGGAGGTCAGGAG--------
----------------------ATTGAGACAATCCTGGCTAACACGGTGAAACCCCATCTCTACTAAAAA----------
--------------------------------------------------------------------------------
--------------------------------------------------------------------------------
--------------------------------------------------------------------------------
--------------------------------------------------------------------------------
--------------------------------------------------------------------------------
--------------------------------------------------------------------------------
--------------------------------------------------------------------------------
--------------------------------------------------------------------------------
--------------------------------------------------------------------------------
--------------------------------------------------------------------------------
--------------------------------------------------------------------------------
--------------------------------------------------------------------------------
--------------------------------------------------------------------------------
--------------------------------------------------------------------------------
--------------------------------------------------------------------------------
--------------------------------------------------------------------------------
--------------------------------------------------------------------------------
--------------------------------------------------------------------------------
--------------------------------------------------------------------------------
--------------------------------------------------------------------------------
--------------------------------------------------------------------------------
--------------------------------------------------------------------------------
--------------------------------------------------------------------------------
--------------------------------------------------------------------------------
--------------------------------------------------------------------------------
--------------------------------------------------------------------------------
--------------------------------------------------------------------------------
--------------------------------------------------------------------------------
--------------------------------------------------------------------------------
--------------------------------------------TACAAAAAATTAGCCTGGCGTGGTGGCGGGCGCCTG
TAATCCCAGCTACTTGGGAGGCTGAGGCAGGAGAATAGTGTGAACCCAGGAGGCGGAGCTTGCAGTGAGCCAAGATCGCG
CCACTGCACTCCAGCCTGGGCAACAGTGCGAGACTCCATCCCAAAAAAAAAAAAAA--------ACTGCTCTCATCCCAA
TTTTCAAGAATACAATACA--TTGTTAACTATAATTGCCACATTGTGCAATAGATCTCTTAAAGATAGTCATCTTTTCAT
TCTGAAGTTGGTATCCTTTTACCAATATCGGCCTCAACTCTCCCTACACCCCAGCTCCTGGAACCCCCTCTTCCACTCTC
TACNNNNNNNNNNNNNNNNNNNNNNNNNNNNNNNNNNNNNNNNNNNNNNNNNNNNNNNNNNNNNNNNNNNNNNNNNNNNN
NNNNNNNNNNNNNNNNNNNNNNNGGCGCAATCCCGTGCTCACTGCAAGCTCCGCCTCCTGTTTTACGCCATTCTCCTGCC
TCAGCCTCTCCGAGTAGCTGGGACTACAGGCGCCCGCCACCACGCCCAGCTAATTTTTTGTATTTTTAGTAGAGACGGGG
TTTCACCATGGTCTCGATCTCCTGACCTTGTGATCCGCCCGCCTCGGCCTCCCAAAGTGCTGGGATTACAAGTGTGAGCC
ACCGTGCCCAGCCTGGAGCTCAACAATTTTTTACATCTACATACTAAGTGATATTATACAGTGTTTGTCTTTCTGTTCCT
GACTTGCTTTACTTAAAGTCCTTCATGGTGTGAGATAGTCTTCTGCATATGGCTATCCAGTTGTTCCAACAC--------
--------------------------------------------------------------------------------
--------------------------------------------------------------------------------
--------------------------------------------------------------------------------
--------------------------------------------------------------------------------
--------------------------------------------------------------------------------
--------------------------------------------------------------------------------
--------------------------------------------------------------------------------
--------------------------------------------------------------------------------
--------------------------------------------------------------------------------
--------------------------------------------------------------------------------
--------------------------------------------------------------------------------
--------------------------------------------------------------------------------
--------------------------------------------------------------------------------
--------------------------------------------------------------------------------
--------------------------------------------------------------------------------
--------------------------------------------------------------------------------
--------------------------------------------------------------------------------
--------------------------------------------------------------------------------
--------------------------------------------------------------------------------
--------------------------------------------------------------------------------
--------------------------------------------------------------------------------
--------------------------------------------------------------------------------
--------------------------------------------------------------------------------
--------------------------------------------------------------------------------
--------------------------------------------------------------------------------
--------------------------------------------------------------------------------
--------------------------------------------------------------------------------
--------------------------------------------------------------------------------
--------------------------------------------------------------------------------
--------------------------------------------------------------------------------
--------------------------------------------------------------------------------
--------------------------------------------------------------------------------
--------------------------------------------------------------------------------
--------------------------------------------------------------------------------
--------------------------------------------------------------------------------
--------------------------------------------------------------------------------
--------------------------------------------------------------------------------
--------------------------------------------------------------------------------
--------------------------------------------------------------------------------
--------------------------------------------------------------------------------
--------------------------------------------------------------------------------
--------------------------------------------------------------------------------
--------------------------------------------------------------------------------
-------------------------------------------------------------------------AACTGAG
AATGGTCCTACCACTGAGGGCAACCTGGCATTTAGATGGCCCGTAGACTGAGTCCACTGCACAGATCTAAAGCCTAGG-C
TGTGAGATACGGCCTGGAGGCTTATCCATAGATACCGGTCTGGAGTCTGGTGCCTTCAGACCTGCCAGGCTGGGTTTTAC
TAGGTTGAGCCCAGTGTTAGGGTCTGAGGTAACGTTTGGTGCTCATTTTCCCCTCTTCCTCCTTGTGGAGGGTACCTCTC
ACATGCTATGCTGCCTGGAGTTGTAAGAGGGGT--------------GAAAGGGAAAATGTAAAACTGTCCTTCCTACAT
TCTTCCATGAGTCTTTTTCTTCTTTCCGTGCTATACCCAGATGCTGTAAGCTCCCACCCTATTTCTTAGTTCTGGTGAGG
TGTTTTAGTTCTTGGATGGTTGTTTAAATTGTTTTTTGGGGGAGACAACTGCTAGAGACTCCTATGATACTATTTTGCTG
ACATCCATCTGCAATTCCTTTCATTTCTATCTACAGCACACACACTTATGTCTCCTTTTTTATTCCTGATTTTGGTGATT
T-GTTTTCTCTCCCTTTTTTTGTCCTTTTAGTTATATTTGG-TCAATTTTGTTAACTTTTACGAAGTTAAAAAGGCTTTT
TGCTACATTGATTTT-ATCTTTTCTT-AAACTTTCTGTATCGTTTCTGCTCTGATCTTTATTATTTCATCTTTTTCATTG
AGTTTTTT---GTTGTTCCTTTTCTAATTTC-CTAAGGTGAAATCTTAGATATTGTGAAATCTTCTTTTTTTCTGATACA
GTGTTTAATAAATGAATTGCTTTAACTGTATTTCATACATTTTAATTTTTGAGTTTTCATTCGGCTCAATGTATTTTCTA
ATTTTCTTTGTGGTTTTTTGGTTTACTCTTGGGTTATTCAGAAAAGTAGTGTTTAATTTTAAAGCATTTAAGAATTTTTT
AAATGTTTCTTCTGCTGTGGATTTCAAATCCCATTCCTTGGTAATCTGATAACTTGTTTTATCATTTGTTAATGTATTGA
AACTTATGGTATGG-----AACATTACATGAGCAGGAAAATATTTTATATGCATTTGAAAAGAATATGTATTCTGCATTC
ATTTGGTGAAATAATCTAAAGATGTCCATTAGGTCAAGCTAACTGATAGTGTT-GTCTTCTATATCCTTTATGGTTTTTA
TTCTAGCTTTTCTATTAATTACTGAGAGTAAATTATTGAAATCTTCACCAGTTGTTATTGAGTTGTCTGTTTTCCTTTTC
TTAATTCTTTATATATTGTTTTCAGTATTTTGAAGCTCTGTTGTTAGGTGAAGATACACTAATATTGTTATTTCTTCTTG
ACATATTGAACCTTTTTATCATTATGAAATATTCCTGTTATTCTCACATAGCATTTCTTGCCTTAAAGTATCTTTGGTCT
AATATTAATATATCTACTTGAGTTGTCTTATGGTTACTGCTTGCATAGTATATATATTTTTATTTCTACTTTGGGTTTAT
TTATGC-TTTGAATCTAATATATGCTCTCCTATAGGTAGTGATAACTGAATCTTCTTCTTTACCCAGTCTGTCTGACAGT
CTCTGACTTTTCATTTGGGTTTTCATTATAACATTTAATGCAATTATTGATAGGGTTTTACTTAAATTTACCATTTTGCT
ATTTGTTTTCTATATTTCTCCTGTCTTTTTTGATGTTGTTATTTTCTGCATCCTTAACTGGCTTCTTCTGTGTTAAATAA
ATATTTTCCAATGTAGATTTTTAGTTTTTCTCTTTCCCAGCTGTATGACATTAGTACTCTTCCTAGTGCTTGCTCTAATG
ATTACAGTATGCATCTTGTCCTATCACAGCCACCTTCTGATTAATAGTAACTTAATTCCAGTAAAATACAGAAAATTCCC
TTCAATATTGCTTCATTTTCTTCATCTTTGGTTATCATTTTGTCATATATCTCACA------------------------
--------------------------------------------------------------------------------
--------------------------------------------------------------------------------
--------------------------------------------------------------------------------
--------------------------------------------------------------------------------
---------------------------AAAATTAGCTGGGCATGGTGGCACGTGCCTGTAATCCCACCTACTTGAGAAAC
TGAGGCAGGAGAATCGCTTGAACCTGGGAGGCAGAGGTTACAGTGAGTCGAGATGGCACCACTGCACTCCAGCCTGGGCA
AGAGAGTCAGACTCTGTCTCAAAAAGAGAAAGGAAAAAA------------CATTTTTTCT-CCATCTTCCAGCAACAAA
TTCTCTCAGTCTTCATCTGAGAATATTTTTTTCTTCATATTTGAAGAAAATTTTTGCTTTACGTGGAGTTTGGAGTTGAC
AGTTTCTTTTAGTGCTTTCAATAAATCAGTCTAGTCTTTTCTCTCATCTACTATT--TCAGATGAGAAGTCAGCTATTAA
TCATGTTGAAAGCATTCCTTATATAATGATTAATTTTTTTCTTGCTGCTTTAATTTTTT-CTTTGCTTTGATTATAGCCT
TTGGAAGTTTTTCTATGATATGTGGGTCTCATATTAGTTATTTAACTTAGGGTTCATTGAACATAGATTTATATATTAAC
ATAGATGAAATATTAATTTTTATAGAATGTAAACAATTTTTCCCCAATTATTTTTTTCTACTGGAAAATGTAGCAACATA
CATGTAATAGGTCTTAAAACAGGTTTTAAACACCTTTTCCTCTCTTCTTTCCTTCTGGAAGATCTATTACATGT------
--ACATTGCTACACTGTGACATCTGACATG---------CTCTTTTTATTTCTTAAGTCTTTTTTCCCTCTGTTCTTTAA
ATTAGAAAATTTTTATTGATTCAGCTTTTCAGGTTCAATGATCTTTTTGTGTGCTGTGGAGCACTTTTAGCGAATATTTC
ATTATTGTTATTTTACTTAAAATTTTCAGAATTTTTATTTCCTTATCATTTCTATCTCTC--GAGCATATCTATTTTTT-
GAGTCATTGTTTTT-ATACTTCAATTCTTTAAGCATAGTTCTCCTTAGTTTTTTAACCTATTTGCAATAGTTGCTTTGAA
GTCTTT-ATCTTCTAGCTCCAACATCTGGGGTCACTTGAGGATATTTTCTATTTATTGTTTTG-GGGGTTTTTT------
---------GTGTGTGTGTGT-GTTTTTTTTT--AATCCCCCTGAGCTGTGGTATTCTATCTTGTTTT---------GTT
TGTATGTGTACACATTTCTTTTGTAAATA---------ACATATATATATATATATGTTAGACAGAGTCTCACTCTGTCG
CCCATGCTAGTATGTAATGGTGCGATCTTGACTCACTATAGCCTCAACATCCTGAACTCAAGCAATCCCCTCACCTCAGC
CCCCAGAGTAGCTGGGACTACAGCTCTGCACTACCATGCTCACCTAATTTTTGTATTTTTTGTAGAGATGGGATTTCATC
ATGTTGCCCAGGCTGGTCTCAATCCACTTGCCTCAGCCTCCCAAAGTCCTGGGATTACAGGAATGAGCCACTGCAGCTGG
CCAAAACATACATTTTTGTTACTTTGTTGTTTCTGAGAATTCCCATCCTCTAGTCTCTACCCAGCAAGAACTGTTTCTGT
ATCTTCATTTAGTTACTTCCCCGTGGTTGCTAATGTCTCTGCTGTGTTTAAAGAAAGCTAAAATATAATTTTTAAGTGTG
GCATCCTAGCTTTGCCATGTGTGTCCATGTATCTTTGGTTTGCCTCTAATCTCGAATAGAAGTTATGTTCAATCCCCTCA
AGGTAGTATGCCTTCTGTCGTCTCCTGGTGAATCTATGCTTGGGTAAGTGAGATTGCCCAAATTAATTCAAAGTTAAGGC
TGTTTAAAAATCTGCCACAATTTACTCACTGACATGTTGTTTCACTTATCCTTT-CCATACCTGTGTGTCTTTAGCATGG
CCAGGGTTGCATATAACTTACTCCTAGTTAAGTTAATATATGTAATTCCTGTTGTTTCCAGCCACAGTGCAGTAGTGCTT
TTAAGATGGGCATCTGGGCTGGGCGCAGTGGCTCATGCCTGTAATCCTAGCACTTTGGGAGGCCGAGGCGGGTGGATCAT
GAGGTCAGGAGATTGAGACCATCCTGGCTAACACGATGAAACACCATCTCTACTAAAAATACAAAAAAAAAAAAAAAAAA
ATTAGCTGGGCATGGTGGCGGGAGCCTGTAGTCCCAGCTACTCGGGAGGCTGAAACAGGAGAATGGCGTGAACCCAGGAG
GCAGAGCTTGCAGTGAGCCGAGATTGCGCCACTGCACCCCAGCCTGGGTGACAGACCGAGACTCCATCTCAAAAAAAAAA
AAAAAAA-------------GATGGGCATCTGATCCAACACAGACAAATGCCATGCAAGCA-TAAAAGTTTTTTATGTTA
AAACTTAGAAG-----TTCTCCTTTCTACTGGGGTTTATATCAGGAGAGTTACATTTCCTTCGTGTACACAGAATAAACT
CAATGTAGAGGAATACGTAGAATTTGGAGCGGGACATTGATCACATTTTTGTTTTTTGTTTTCAGATGAAGTCTCACTCT
GTTGCCCAGGCTGGAGTGCAGTGGCGTGATCTCAGATAACTGCAACCTCCACCTCCTGGGTTCAAACAATTCTTGTGCCT
CAGCCTGCTGAGTAGCTGGGATT--ATAGGCATGCGTATGTTTTGAAGAGACGGAA------------------------
--------------------------------------------------------------------------------
--------------------------------------------------------------------------------
--------------------------------------------------------------------------------
--------------------------------------------------------------------------------
--------------------------------------------------------------------------------
--------------------------------------------------------------------------------
--------------------------------------------------------------------------------
--------------------------------------------------------------------------------
--------------------------------------------------------------------------------
------------TTTCACCAGATTGGCCAGGCTGGTCTTGAACTCCTGACCTCAAGTGATCTGCTCACCTTAGCCTCCCA
AAGTGCTGAGATCACAGGCAGGAGTCACTGTGCCTGGCCTATAGACCAGATCTTGATG--ACAAGGTTTGAGTTTCAAAA
TTCCGCTGTGACTGAAGTTGTAATTACCCTTTCCAAAATATTTTTCACCA-----------------------------C
TTACTCCAGTTTTATTTGGTTTATGTTACATACAACATAAAAGTATTAATAC-AAAAAGCAAAACTATTTGATTGTACGT
GTAGATCCAGCTATTGGCTTTGTTCTTG-AAAAAAAATCTATGTGGAAAAATTATGTCTGGCATAAAGGAGACCAAAGAC
ATTGCATTGGTACATATCTGCTAAAACAAAA----CAATATTTGTGGTGATAAAGAAGAGTAGATTA-------------
--------------------CCCAAAACCATTAAGAATGTAAACTAGCCGGGTGCAGTGGCTCATGCCTGTGATCCCAGC
ACTTTGGGAGTCTGAGGCAGGAGGATCGCCTGAGGTTGGGAGTTTGAGACCAGCCCGACCAACATGGAGAAACCCTGTCT
CTACTAAAAATACAAAAA--TTAGCTGGGCGTGGTGGCGCACACCTGTAATCCCAGCTACTCGGGAGGCTGAGGCAGGAG
AATTGCTTGAACCCCGGAGGTGGAGGTTGCGGTGAGCCGAGATTGCACCACTGCACTCCAGCCTGGGAAAC--GAGTGAA
ACCCCGTATCAAAAAAAAAAAAAAAAAAAAAAAAAAAA---------------GAATGTAGACCAAACTGTCCTGTTAGA
GACTA--GAGTTCAGAGTAAAT---GTTTTTAGGACAATGACTGAGTAGATATTAGTAATATTATGGACAATGTGGTATA
AGAGAGAAGACAGTATGGTTGGTGTTACATAATAAAAATTCTTAGTTGTTGGTCCTTGTTGCTCCTTCACTACTGAATAC
ATTAAACTGCATTTAAGTGACAAACTTGGGTAAAAGTAGAGAATTGGAAA-TCAGTTGCACATATGTGTGT--CAAACTT
AAGGAAGTGAGTGAAGTCAGTTACAGTTAATGTCTAAAACGAAAAGAGAGCAACCTTAA---------------------
--------------------------------------------------------------------------------
--------------------------------------------------------------------------------
--------------------------------------------------------------------------------
----------------------GTACATAGGCCGGGTGTCGTGGCTCATGCCTGTAATCTCAGCACTTTGGGAGGCCGAG
GCAGGTGGATAACTTGAGGTCAGGAGTTCAAGACCAGCCTGACCAACATGGTGAAACCCCATTTCTACTAAAAA-TACAA
AAAAT-AGCCGGGCAT------TGTGGTGGGCGCCAGTAATCCCAGCTACTCAGGAGGTTGAGGCAGGAGAATGGCTTGA
ACCCGGGAGGCGGAGGTGGCAGTGACCAGAGATCACGCCACTGCACTCCAGCCTGGGCAACAAAATGAGACTCCTTCTTA
AAAAAAAAAGAAAGAAAA--------------------------------------------------------------
-----------ATATCTAT-CTTGTTTAGTACACTTGTTTGCTTATACCCTCAGCAAAAGCCACGTAAACATCTTGAGCA
CTATTATTCATTCATATTTGATTCTTCAAAATGTGACATAATGCCTGGAGAATAAGTTTATATATAT--GTTTTGTTGCT
TATTTTTGTG---------ATTTTGTTTT----TGTTT-AGAAATGGGGTCTTACTCTGCAACCCAGACTGGAGTGCAGT
AGTGTGATCCTAGCTCAGTGCAGCCTCAGTCAAACTTCTGGGCTCAA---ATTCTCCCACCTCAGCTTCCCAAGTAGTTG
GAACTACAGGCTCATGCCACCATGCTTGGCTAATTTTTTTTTTT----TTTTTTGTAGAGATGGGGTCATGCTATGTTGC
CTAGGCTGTACATCTGTTTAATAAATCAAAGAAGC---------------------------------------------
--------------------------------------------------------------------------------
--------------------------------------------------------------------------------
--------------------------------------------------------------------------------
--------------ACTAATTATTTAAATCATTTCATGGAGAGCCATATACGTTTGGAGAAAAA--CAAATTGTCAGTCA
CTTCTTTTCCTTCTAAACATGTCCCATC-----TGCAGAAACCAGAAGCCTCTTCCACAAGGATGAAAGCTATTTCTACT
TTTAAGGGAACCTGGAACTCTCACATGAGTCTTCTGGGATGATTGCCTCTTGAGTCTTATCTTTGCTTTTTTTTGTTTTG
AGACGGAGTCTTGCTCTGTCGCCCAGGCTGGAGTGCAGTGGCATGATCTTGGCTCACTGCAAGCTCTGCCTCCTGGGTTC
ACGCTATTCTCCTGCCTCAGCCTCTCTGAGTAGCTGGGACTACAGGCGCCCACCACCACGCCCGGCTAAGTTTTCGTATT
TTTAGGAGAGACGGGGTTTCACCATGTTAGCCAAGATGGTCTCGATCCCCTGACCTTGTGATCCGCCTGCCTCGGCCTCC
CAAAGTGCTGGGATTACAGGCTTGAGCCACCGCGCCCGGCCTTATCTTTGCTTTTTT-GTCTTTCACACTGTCACCATCT
CCATTCTCAGCACATTAAGAACTGGGGGAAAAATGATGAAGCTTTGTAAGTGAGGAGAGACTCTTTCTNNNNNNNNNNNN
NNNNNNNNNNNNNNNNNNNNNNNNNNGATGGCGTCATAAAAAGGTATGTGTGGGAGGACAGAGATGTTTTCTTTT-GTGC
AGTGAGGAGAGATTTATAGCCATTAGAATTGTCCTGGGTTTAGGGCCGGGCGCGGTGGCTCATGCTTGTAATCCCAGCAC
TTTGGGAGGCCGAGGCAGGCGGATCACGAGGTCAGGAGATCGAGACCATCCTGGCTAACAGGTGAAACCCCGTCTCTACT
AAAAATACAAAAAATTAGCCGGGCGTGGTGGCGGGTGCCTGTAGTCCCAGCTACTCGGAGAGGCTGAGGCAGGAGAATGG
CGTGAACCTGGGAGGCGGAGCTTGCAGTGAGCCGAGATCGCGCCACTGCACTCCAGCCTGGGTGACAGAGAGAGACTCTG
TCTCAAAAAAAAAAAAAAAAAAAAGAATTGTCCTGGGTTTAATTAGAATAAAACATCTCCCAGGGCAGAAAAATTTCTGT
ATTGTTTTATCAT-----------AAATTTCTGGTCATAAATCAGCATTCGAATGTTCTATAACTA--------------
--------------------------------------------------------------------------------
--------------------------------------------------------------------------------
--------------------------------------------------------------------------------
--------------------------------------------------------------------------------
--------------TTAAGAATAGACCAGATTTGGCCAGGTGTGGTGGCTCAAGCCTATAATCCCAGCACTTTGGGACGC
TGAGTCAGGAAGATGA----------GGAGTTTGAGACCAGCTTGGCCAACATGGCAAAACCCTGTCTCTATCAAAAAAA
A------TACAAAAATTAGGGGGGGCGTGGTGGCACATGCCTGTAATCCCAGCTATTCAGGAGGCTGAGGCATGAGAATT
GCTTGAATCCGGGAGGCAGAGGTTGCAGTGAGCTGAGACCGTGCCGCTGCACTCCAGTCTGGGCGACAAAGTGAGACTCT
GTCTTAGAAAAATCAA-TAAAATTAAAT--AAAA---TTAAAAAAAAAAAA--GGAATAGACCAGATTCTATGGTAGAAA
ATTTGGGTGGTGGAGACTCAGAGTGTGGGTCAGTAGTGGTTTCAGGGATAAGGTGTTGCAGTGTCGGACCCCTGTGCCAT
CACCATTTTATTACCTACATCTAGTTCTGTTTCTGTATTTAATAGGTACTTGATTTATTTTGGATGGGCCATATTTTCTT
TTTCTCTCATATACCCCGAATTGTCCATTGGGACAATTCCCACATGTTTATATTTTCCTCCTGGAAAAAGA---------
--------------------------------------------------------------------------------
--------------------------------------------------------------------------------
--------------------------------------------------------------------------------
-------------------------------------------------------CCAGTTCC-TCTTCATTTATATTTA
GATTTCCAAAATCAGATGTTTATTTCTGGAATAATATTTCAAAATAATATTCTGGATTATATGTGGTCATGGTACAAAGA
ATTGATCCACCTCAGTTGCGTTGTTTAGAGGAGCATAAAAAGGTGCTATTCTTGTGTCTAAAATCGCACACCTCGCACAC
CTACGTGGTGGTATCAAGTTCTTTCTAACCACATGAAATTCAGGCCAGTAATAGTTTAGTGC--ACATAATTTCTCATTT
GCCAAGTGTTTGTAATTTTTCCCAGAAATCTGAAACCTTAGATGTTATCTGAGTACCTCCCTGCTGGGAATAGCTTTGAA
GGTCTTAGGCCTCTCCAAACAGGATTCCTCTCTTGATATGTCTCAAA--CACCCAGGAG---------CCAGGTTCTGCA
ACCTCACTTTCTAACCATCTCCCTGGGAACTCCACATACATAGCGATGATGTTTCCACCCATTAAATGTTAGGGTTTCTT
TTGTAAGGCACCAAAGTTTTGTTTTGTTTT------------------------------------AAAATCCTTTTTTT
TTTTTT------ATGTCCTATGAGTTTAAGAATGTAGACAGGTGGCCGGGCGCGGTGGCTCGCGCTTGTAATCCCAGCAC
TTTGGGAGGCCAAGGCGGGCGGATCACGAGGTCAGGAGATCGAGACCACAGTGAAACCCCGTCTCTACTAAAAATACAAA
AAATTAGCCGGGCGTGGTGGCGGGCGCCTGTAGTCCCAGCTACTCGGAGAGGCTGAGGCAGGAGAATGGCGTGAACCTGG
GAGGCGGAGCTTGCAGTGAGCCGAGACTGCGCCACTGCACTCCAGCCTGGGTGACAGAGCAAGACTCCGTCTCAAAAAAA
AAAAAAAAAAAAGAATGTAGACAGGGAGAGGTTAATTATTTCATTTTAGAAGGAAGAAACTGTG-CTTCTGAGAGGTTAA
GATCTTCCCACATTCTCACAGAAAGTGAGTGGGAAGGCAAACATGAGAACATTTTGTTTGCCTCCAGGGTCAA-------
--------------------------------------------------------------------------------
--------------------------------------------------------------------------------
--------------------------------------------------------------------------------
-------------------------------------------------------------------------GAGTTTG
CACTCTCCCTTCTCAGGATCCCCAAGAAGAGAGTTCAAGTGCATCAATGGGCTGAAATGATAGGAAGTCAGGGGTGTTCC
AGGGACACAAGGTCAAAGGTTTGGAAG------TATTTTTTTTTTTTTTTT-AATTCTTAGGATGAAGAACGTGACCTTG
AAGAAGCCAGAAACTTTTCCAAAAAATCAAAGGAGAGTGTTTCGAGCTGCTGATCTGAAAGTAATGTTAGAAGAGTTGAG
AGGTGAGGAGAGCTAGATCAACAACAGGGTTACGGAATTCAAGTG------GTGTCAGGGTGCTAAATAGGGAAGAGGGT
GCAGTTTCCAAATATGGATAGAGGGGATAGGGGAGGATGGATATTGTCTGCTGCTGATGGGATTATATTTAATGGGAAAT
GGCTAGGTGGCTGTTTCATCTCGTCATTCAGCAATTTACTGCCC---TACCATAGGGCATACCTACTCTTTCCCTAATCT
GGAGAGAAAATGAATTTCAGTGCTGACTCCTTT-GTTTGTATTCAATATTGTGCATTTTTATCATTTCAGAGCTGAGAGA
TGTCCAACACTACTGGGGTAAGGAGAAGTCACATTATCATAAGCCACCCAGCAGCTTATCAGCTTATCATTATTATTACC
TTTATCTTTTA-GAATTTTATGTT--------------------------------------------------------
--------------------------------------------------------------------------------
--------------------------------------------------------------------------------
--------------------------------------------------------------------------------
--------------------------------------------------------------------------------
--------------------------------------------------------------------------------
--------------------------------------------------------------------------------
--------------------------------------------------------------------------------
--------------------------------------------------------------------------------
--------------------------------------------------------------------------------
-CTCTATTAGGTCTCATGTTTTAAGATTTATGATTCTCCTTCCA--ACACACATAACTTACCCCTCCT------------
----------TATAACTTCTAAACAAGGTTCCTCCCAGTTTTCTCTCAAGTCTTTATCAAGATTTCTCTCATATCACA-A
ATAAAGTTACATTATATCCCTTAGCTGACCTGTTAATTTTTCTACAGTTGATGTGACAGTGGCTCCAAACAACATTTCAT
ATGCTGTCATTTCTGAAGATATGAGACAAGTGAGCTCTCCGGAACCACAGATAATATATGAGGCACAAGGGACAATATCT
CAGACATTTGT------GAATTTCAATTATTGTACTGGCATCCTGGGCTCTCAAAGTATCACATCAGGGAAACATTACTG
GGAGGTAGACGTGTCCAAGAAAAGTGCTTGGATCCTGGGGGTATGTGCTGGCTTGCAACCTGATGCAATGTATAATATTG
AACAAAATGAAAATTATCAACCTAAATATGGCTACTGGGTTATAGGGTTAGAGGAACGAGTTAAATGTAATGCTTTCCAG
GATGGTTCCTTCCATACTCCTTCTGCTCCTTTCATTGTGCCCCTCTCTGTGAATATTTGTCCTGATCGTGTTGGAGTTTT
CCTAGACTATGAGGCTTGCACTCTCTCATTCTTCAATATCACAAACCATGGAGTTCTCATCTATAAGTTTTCTCACTGTT
CTTTTTCTCAGCCTGTATTTCCATATTTAAATCCTAGAAAATGTACAGTCCCCATGACTCTGTGCTCACCAAGCTCTTGA
ACCTTCTTACACACTCAGCCCCTTCTGTACAGCACCTCTTGTCCAGGTGCATCTCATACACCTGAACTCATTTGCATCAT
TTTAACCATCTTTTCCTTGCTGTCTCCCTTCTTTCTATTTGACCATCCTTCACTCATCAGTAAAATG---TAATTGCCTT
GTGCCATATTCTCCCCAGTATTTTATTGACATTTGATAGCAATTTTTTT-CATCATTTTCCATACTCCTAAGGAAAACTG
ACCTATACCTCATAAAATGAGACCACTATTTAGGTATTACTTCCGCCAAATATTTATCACCCAATTGCCTCTGAC----A
CTAAGGAGATGAAGACAAGTTTTTCAACAGCCTTTCT-----ATATCATCATGTGATAGTTGCTCACCAATGAATGAGTC
CTTAGCCCTGTGTCAGTTTACCCTCGATGCCCTTATTTGT----GAGTTAAAGAGAAAATATCATAAATGGTATACTCTT
AAGTGTAGAGGTTTTGTATCTAGAGGATCTGAGTTCAACTCCTGT------------CTCTCCATATACTAGCAGTGTAA
CTGTGAATAACATACTTAAATGGCTGTGCTTATTTTATTTTATTTTATTTTT--------------------GAGATGGA
GTTTTGCTCTTGTTCCCCAGGCTGGAGTGCAATGGCACAATCTTGGCTCACTGCAACCTCCACCTCTCAGATTCAAGCAA
TTCTCCTGCCTCAGCCTTCCAAGTAGCTGGGATTACAGGCACCCACCACCACCCCCGGCTAAATTTGTATTTTTAGTAGA
GACAGGGTTTCCCCA-----TGTTGGTTAGGCTCGTCTAGAACTCCTGACCTCAGGTGATCCACCTGCCTCGGCCTCCCA
AAGTGCTGGGATTACAGGCATGAGCCACCGTGCCCA----GCCTGTGCTTATTTTCTTAAAATAATTTTTGTATTAAAAA
CTTCACATTAAATAAGTGCTAATGTTTTATTGCATAGTAGGGTGACTAGAGTTAACAATAACCTATTGCATATATTTTGA
AGTAGCTAGAAGAGAGGATTTTGAA------------------------AGTTCTCAACAGAAAGAAATGACACATATTT
GAGGTGATGGATATGCTAATTACCC---TGGTTTGGTTATTACACAACGTATACATGTATCAAAACACCACACTGTACCA
CATAAATATGTACATTTATTATTTGTCAATTAAAAGCAAAATAAAACAAAAAACCTTCGTCTAATACTTTGGATCATTGT
GAAAAAATAAATTCCCGAAGTATAAAGCATCT
>Macaca_mulatta_TRIM5
GCACTTCCTCT-AGGAAAATTCCTTTGCGCAGATCAGG-CCCCTGGATTGGTGACTGAATCCTAACCGTGTCTT----TC
CTGGCCTGCCTTCACTCTTCTCCCCAGACTCACTACTTCTGCACTGGTGTCTGAAGGTGTATTGAGTGACTTTGTGGAGG
GCAGAAGTAGGAAGTCTTTGGGACAAAACTGAATTTACCTTGGTGAGTTTAACTTATCTGAAAAGCTGTTCGGG-ATGGG
GAAAAGACACCGTTCACAGACGTCCTGCTGCCAGAGCTGACTGAGGGGAATAGAGCTGCCTGGTGGGCAGGCAGATTTGA
AAGAAGGGAGAGCTTT----------------------------------------------------------------
--------------------------------------------------------------------------------
--------------------------------------------------------------------------------
--------------------------------------------------------------------------------
----------------------------------AAAATGAAGCGCTTTGTTTCCTGGAAGGCTGGTTATTTTTCCACGC
TGACTCTCTCGCCATCCCCTCTCTATTCTATAATTTTTTATTGAACTTTGCTGTAGAGAGCCAGAATTCTCT--TTCAGT
GCCTTCTCCCGACAA---GGGCAAAGACAGGGGCCTTGGAACCCTAATGATTTAATGCCTATCAGTGTGCTAATGTAGTG
TTTCTGCATAACTCTACAGGTCAGCTCTCATCACCTGGGCCTGTCTCTGTGGCATCA-CCTTGGTGGTGTGACAGCGGTC
CAGCTCTGTAGCGCTGTCATTGTCACTGGTAAACGGAGTTATTTCCCTAGTTCATATTGGTTACAAAGATAATGGCAAAA
AAAGGCAAGCAGGTTTTATTTCTTGCTGGGAGTGGAGAATAAGAGAACTCCTTCTCTAAAGCCCCCTCCCCCGAAACAGT
GGGAAGCAATGGGCTTTAAAAGAACTCTGCATGGGAAGAGAAAGGAGTGTTAGCCTGCAGGGTGAAGCTCCAGTTGTGCC
ACCTCTGTTTATAAACACATGTCTTCATAC--------------------------------------------------
--------------------------------------------------------------------------------
--------------------------------------------------------------------------------
--------------------------------------------------------------------------------
--------------------------------------------------------------------------------
--------------------------------------------------------------------------------
--------------------------------------------------------------------------------
--------------------------------------------------------------------------------
--------------------------------------------------------------------------------
--------------------------------------------------------------------------------
--------------------------------------------------------------------------------
--------------------------------------------------------------------------------
--------------------------------------------------------------------------------
--------------------------------------------------------------------------------
--------------------------------------------------------------------------------
--------------------------------------------------------------------------------
--------------------------------------------------------------------------------
--------------------------------------------------------------------------------
-------------------AACACATGC-CACAAAGTGGTGGAGATTTTCTTGTTTGCTGTCG-----GGGTGGGA----
--TAACACTCTAGTGATATGTTAATGATCCAAAGGCAATGAGGGATTGTCTGTTCCAGTTT--ACGCAGGTTTGGGGGTC
TAATTTCCCCCTTGGATCTGGTC-GGGGTGAAGATATGGACCATGCTGGGCAGTCTGGCTTCTT--TAAGCAGCTTTGTC
TATAAATAAAAGGAATAAAGAAAACCATTAAGAAAAATAACTTTCCCAGTTATTTCATCAGGGCTTCCCTGGTGACAGCA
TCTGTTTACCCTTACTAGG-CACCAAGTCCAGACTCAGGGAACAACTGGATTTCCTTAAAAATCATTAACCTTGCTCCTC
CCTCTCCTTGGGCCGTATGTGCCCTGCAAAAGCAGAGCTTAG--GTGAGATACAAAGAGCAGCAGAAGCATGTG-AAGGA
ATACCCAGAGATGGCACCGTTTCTAACTTTTAATAAACAAAATGAGTACTTGTGTAAACCAAAAATAAAATTCTGTGGCC
CCTAGCCACCTGAATGGACTTTCTC---AGCCAGGCTGCTCTTAAAATGTAACCTGAAAGACTGATTCAGGCCATGACAG
GAAACGGAAGTGGGACCTGACTCATTATTCCTCTCCAGCATGAACTTCAACATAGACCCTAAGTCTGGTAAGAAACATTT
CAGTCTATTCTCTCTGAAGCCTGATACCCTAAGGCTGCATCTGCACAGTAAGAACTTTGGTCTCCACAGTTGCTTATCTG
AACTCAGACATTTCCTTTCTATTGATCCCAGGTCTTTAGATAAAGACAGTTGTCAACCAGAGTCTTTCTTAAATGTATTT
GATTGAAGTATCTTGTCTCCTTAAAATATATGAAACCAAGCTACACCCCAACCAGCTTGGACACATGTTCTTAGGATCTC
CTGAGGGCTGTGTCATGGGGCATCGTCACTCATATTTGGCACAGAATAAATCTCTTCAAAATATTTTACAGAGTTTGACC
CTTTTCATCGACACTTGGTTGATGTTAATGATATCAGATGTCAGAAGTGGTGTGATAACAGGATCCTGAGACACATGAGA
GAGGGAGTCTCTCTCATGGGGACCCTCTGTATTCAACTCCAAATGTCCTTCCCATGAAAGATATAGCTGC---ACTTAAG
CTAATTCAAGCTTATATGGAAGACTCCAGGCAAAACTGTTTCCTCATCCCAACTTCCCTTCATCTGACCAAATCTTACTG
CCTTAAGGTTGATTTT-GGAGAGCTCACCTCTGCTTCATGTTTCTTGTCCCTGCTTCTGGTGATAAATCAGTGTTTGGCA
CCCATCTTCTGAACTCATACAGAATACCTTTCTGGTGGCATTGTAAACCAAAGAAACTAATGGAAGGGGGCCTCACTCAA
TTTGGATGTTTATTTTGCCAGGGTTGAGGACATGCCTAGGAAAAAGGAGCATAAAATCACAGGAACATC---TGTGATTC
ATGCTTTTTCCAAAGGGGGTTTGAGGACTTCAGTATTTAAAGGGGAAAGAGAAAAGAAAAAAATGGAGGAGAGTCGATAA
AAGAAGCAAAAGGTTACATTCTTTTGAGGCTTTAGCTAGCGTTAGCTGAAGCCATAATTTACATGTTAAAGGAGGGCTTG
GAGGAGTAATCAATTATGCACTGTCTCCCACTCAGTGAATCTGCATTTTTACAAAAGATAAACAGGGAGTAGCAGAAACA
GTCAAACATGCATTTGTCTCAGGTGAGCTGAGGGATGATTTATCCTCTGTCTTTGTCCCATACTAGTGAAGATAAGCTTG
CTAATTGACATTGTCAGGGTGAAATTCAACAGATCTCCATTTCAGAGTAAAGACCTTGGGGCCCACAAGAAATTTCCTTG
TGAGCAAATTGTGAGGGAAGCCACCTGGGAGGTATGTGG--------CTTTGCAGCTATGGTATCTTTGCAGCTATCTAG
GAACAAAATATTATAGAAGG----------TGGCCCAATTCCCAAGCTTTAGTATTCCCTTTGGCATAGTGAGTTTGGGG
CCCCAGATTGTTATTTTCGTTTCAAACCATATATTTCAAGATTTT-AGAACTGACTCGATAATCTTCGGCTTCTATTTTT
TT-ATTTTGCTGGTATGGTGGGGAGTATACCATTAAATGGTTGTGATACTGTGAAATACGTTTGGTCTTCATCACT-AAA
CCTAGCATACATCTCCTACAATTCTTGAATCTGCAAAGTGGTAAGTGTCTTTTTGTATGATAATTAATCAATTAATGGCT
GGCAGCCCCTCGGTAGCTTCAGGA-GTGGGGGTCCTCGCCAGAAAGACTAAGGCAGAAAATGAGGGTTGGGACTTTCAGC
TCAACCCACCAACCTCTGGGGAGAAGAGAGGGGCTAAAGGTTAAGTTGTACTGATAGCCAGTGATTTAATCTATTATACC
AATGTAATGATGCCTCCATGAAAACCTAAAAGGACAGGGTTCAATAAGGTTCCAAATAGCTGAACACTTGGAGGTTTCTG
GAGCGTAGTGTGCCTGCTGAGGGCAGGGAAGCTCCATGCCCCTTCTCTCATGTGTCAGCCTATGCCTCTATCTGTATACT
TTGTGATGTCCTTCATAATAAACCAGTACATATAAAGGGGAGAACCCTGACTTATAGCCAGTCAGGCAGAAGCACAGGTA
AAACAAGCTGAGTCTTGGAGTTGGCATCAGAAGTTGGGGAG-CAGTCTGTGGGCCCAAGCCTTCAGCCTGTGGAATCTGA
TGCTCTCTCCAGGTATAGTGTCAGAATTGAATTAGAAGACACCCCATTGGAGTTTGCTGCTGAAAGAAGGCCTCCTTCTA
GTTTTGGG-AAAAACTCTCGCAAATTTGATCACAGACGTCTTCTGTGTTGATTGTTTACTGAGAGTATAGGCTATGCTGA
GTTTCTTTGTTTCCTACACAGTACTATGGATACA----------------------------------------------
--------------------------------------------------------------------------------
--------------------------------------------------------------------------------
--------------------------------------------------------------------------------
--------------------------------------------------------------------------------
--------------------------------------------------------------------------------
--------------------------------------------------------------------------------
--------------------------------------------------------------------------------
--------------------------------------------------------------------------------
--------------------------------------------------------------------------------
--------------------------------------------------------------------------------
--------------------------------------------------------------------------------
--------------------------------------------------------------------------------
--------------------------------------------------------------------------------
--------------------------------------------------------------------------------
--------------------------------------------------------------------------------
--------------------------------------------------------------------------------
--------------------------------------------------------------------------------
--------------------------------------------------------------------------------
--------------------------------------------------------------------------------
--------------------------------------------------------------------------------
--------------------------------------------------------------------------------
--------------------------------------------------------------------------------
--------------------------------------------------------------------------------
--------------------------------------------------------------------------------
--------------------------------------------------------------------------------
--------------------------------------------------------------------------------
--------------------------------------------------------------------------------
--------------------------------------------------------------------------------
--------------------------------------------------------------------------------
--------------------------------------------------------------------------------
--------------------------------------------------------------------------------
--------------------------------------------------------------------------------
--------------------------------------------------------------------------------
--------------------------------------------------------------------------------
--------------------------------------------------------------------------------
--------------------------------------------------------------------------------
--------------------------------------------------------------------------------
--------------------------------------------------------------------------------
--------------------------------------------------------------------------------
--------------------------------------------------------------------------------
--------------------------------------------------------------------------------
--------------------------------------------------------------------------------
--------------------------------------------------------------------------------
--------------------------------------------------------------------------------
--------------------------------------------------------------------------------
--------------------------------------------------------------------------------
--------------------------------------------------------------------------------
--------------------------------------------------------------------------------
--------------------------------------------------------------------------------
--------------------------------------------------------------------------------
--------------------------------------------------------------------------------
--------------------------------------------------------------------------------
--------------------------------------------------------------------------------
--------------------------------------------------------------------------------
--------------------------------------------------------------------------------
--------------------------------------------------------------------------------
--------------------------------------------------------------------------------
--------------------------------------------------------------------------------
--------------------------------------------------------------------------------
--------------------------------------------------------------------------------
--------------------------------------------------------------------------------
--------------------------------------------------------------------------------
--------------------------------------------------------------------------------
--------------------------------------------------------------------------------
--------------------------------------------------------------------------------
--------------------------------------------------------------------------------
--------------------------------------------------------------------------------
--------------------------------------------------------------------------------
--------------------------------------------------------------------------------
--------------------------------------------------------------------------------
--------------------------------------------------------------------------------
--------------------------------------------------------------------------------
--------------------------------------------------------------------------------
--------------------------------------------------------------------------------
--------------------------------------------------------------------------------
GCTCT---GACTGGAGGAACACCA-GGTTTTTGGTCTTGGCGCCGATAGGATTAATGACATGGACACACGTGGAGTGATT
TTAAGGAGCGAAAAGTTTAATAGGCAAGAAGGAAGG---------------------------------AAGGAAGAA--
-GAAAA---CAGCTCCCCCAAATAGAGACAGGGGAAGGGGGGATTTGGCAAAGAGAAAAACCTCTCGTGTGGTGGAAAAG
TGGCTGCTTATACTAGGAGGCTGGAGGAGGTGGTGTCTGATTTGCATAGAACTCAGGGGATTGGTTTGACCAGGCATGTC
ATTCGTGTGACTCG-GGAAAAAACTGGC------AGCCTAGCCTTTCAATATGCAAATGCAGGGCACCACAATGTTTTAC
ACATGGTGGGGATACGTGGTGGCATCTATATTGCCAGGCACTTACTGGGGCAAGGAAGAAGATGGTGGGAATCACCAGGT
TTGG-ATGGACCCAGTTTCTAATGGCCAGCATTTGCATATTACAGCTTGCTGGCCCAGCTCGAAGAGCTGGGGCTTTTCT
GCTAGACAA---ATGTTTCTGGAGCTGCTTTAAAACAAACGAAAACTTCCCAAGGACCCCTTTTCCTCTCTATCTGCCTA
AAATAATTTCTTAATAAATCCTATAACAGTATTAGATGATATTGCTTAGCAAATGAATCTCAGTACAATTTCATTTTTCC
CACCTATGTATGAAAGGTGATGCCTTCCCATATAACATCAGTAATTTGCAGCTATATTATGCTTAGAGAAACAGTTTTAC
CCAGGTCACAGGAGAAGAAAATTCTGTCTATA-TGCATATTGCTTGGATTTTACAAAAACTTGTTATTGTCTTGTAATGT
CTTTGTTGCTTGTGTTTAGCTGTCACCTCTAGGACATGTTGAATTTACATTTTCATGATCTCAGATGTCAG---AAGGTC
CATGTGTAAGGTGCAATAACCTGACATGTATGGCAGGTTGCTGGCCTGAGAGATACCAGGCAGATAAT---TGTGTTCCC
ATCTCAACCTCCCTGACTGCTGTGCAGCCCTTGGGTCACTGCTTAGGTAGTGGCGGGGTTAGCCCCATGTGTGAAAATTC
TGGTCCCGCTGCATATTCCTCTTACTATGTCTGTTATGGCAGCAGTTACTTTGACATGGGCTCCTTGTAATATCACATCA
AACATAAATTTCACAGCCTCATGGCAGAAGGCAGTCTCCGTT---CCTCTCTCCCGTAGGCTCTTGATGCATCTCAGTGC
TGATGCAATTTTTAATGGAATAAAAGATAAATGGAGTCCTCACTCTCATGTTTGGATCACAACTTGAGTCATAAACAAGG
CTAGACATTATCATATGATTTAAACCTCTGATCTTGCTATTTATCAGAGCCTGATACAGGCCAATGTCCCTGAAGCATAA
CAGTATATGCCGTTGGCCCATTTTCAGTATCTA-TACCAATGGATGGATTGTGCCTCCATCCCACCTTCATTCAGCCTTG
TTCTTTATGTCCTTCACAGATGATGGGAGCAGTGTACAGTTTTTGTAGGTCTGAATTTATCTCCATATAGCCTTTATAAC
ATTTCT--CTCTTTTTCAGAGCAAGGGAAAGACTCATCAGCTGTCTCATAGTGGAGATCTTTGTTTTACCATGAACCCTT
GACAGCCAGCAACACATCAGTATCCATTAATGTCTTCTCTTACCTTGTTTTTAGCTTTACAGTTCCATTTACCTGGAACT
CCTGACAGCCCTTGATCCTAGATTGAGGCCACAGGGTCATTACTGAACCCAGGTCTGTCAGTCAACATCTCTGAGCCACC
ACTCTGTGATATTTCCCTGACTGAACAACAGCAGCAGTTTCCAATCTGATTTGCAGTTTCCCTTGCGGGAGATAATAGCC
CTAAACTAGCCAGGTTCGTGTAGTTCAGCCAGGGT-ATGCAGGACAGAAGAACCATGTGGCACAGCCTCCTCAGATGAGT
TCTCAGTGAGAGTCCCTAGGGTAGTACAGGAGGTATTAT---CTCTATCATGTGAGTTTTTTAAGAAATGAAACTGGCTG
GATGTGTGTGAAACTGCTGTAGGTTAGATAAGCTTAGTACCCCAAAGGACTGATTATCTTGTGAAAGCTCAGGAGAACAG
TTCTCAGGGACTTAAAAAAGGGACATACCTGGTTCTGTGGTGGAAAATGAGGTCTGTTCCTACCAACTGGAATTTAAGAT
CTATATACAGCCTTCCTAGTCCAAATCTGCTTTATATATCAGAATATAATTACTATCAATATACTATTGTACTATACTAT
TACTATATATTTCTATTACAGAATATATTGCTGTCAATAACAGCCTCATGTAGGCTAGCAAGACAGCTGACATTTCACTC
TATTGTAACCCAATAAATTTCCCAGAAGAAAACAATACCAGAAGGATAAGCTAGTATCATCTTTATAGGAGAAAAGAGTT
CAAGCCTGATATTAACCCTTTGTTCCCACATGTGTAGTCTAGTTCCCAACACTGTTCCTTTTATCTCGATTTATCTCTCA
CTCTCATTTGCTCTCCATTTCTTCCATCACCTTGTCCTGCAAGCTGTCATCAGCTCTCTCCTATATCCTAACTAATCTTC
CCCCTTGCACACTAGATCTGTCTAACCTTTCGCAACCCGTGCTCAAAGTTAATGATGTCCCCACTT-------CTGACTG
AGACTGATAACTTTAATGGACAGTTGATACTAATAATTTTTCCTCGCTCTTTTTTTTT-CTTTTGAGAC--AGTTTCGCT
CTTATTGCCCAGGC-------CAGAGTGCAATGGCGCGATCTTGGCTCACCGCAACCTCCA------GGGTTCAAGTGAT
TCTCCTGCCTCAGCCTCCCAAGTAGCTGGGATTATAGGCATGTGCCACCAGGCCTGGCTAATTTT-GTGTTTTT-AGTAG
AGGCGTGGTTTCTCTGTGTTGGTCAGACTGGTCTTGAACTCCCGACCTCAGGTGATCTGCCCGCCTCGGCCTCCCAAAGT
GGTGGGATTACAGGCGTGGGCCACCGCGCCCAGC-------------------------------CTAA--------TTT
TTCCTCACTCTTAAGAAAGAGTTCCCAAAT---ATGTCATTTGGGATGTGTCACATTTTCTGATCCCTGTAATACTAAAA
GTCTAACAGATCTGTGCACAATATGCACCATAATAGGTCTGTGCACAAGAGGAAACTGGCAACTTAAAACCCTTAGATGT
TGCATTTTCCATGTACAAGTTATTCATATATGTAATTTCTTCTA-CTAATACATTTGCCCTGCTCTCATCCTACGTTTTC
TCATAT----CACGCTTCAGTTAAACCTTTA-GTTTTCAATTAGTAATTCTTGGAT-AACCCTTGCTTCGCTTCATTATT
TGACTTCTCAAGAGCACTTACCTCTCTCTAGTAGTATTCATCACATCTGCTATTTT--GTATATATATGGCTGATCATTT
AGTTTACTATAAAGTTTTAGGTGAATGCCAAGTTTACAGTAGATTAAACACCACGTTAATCTTTGTCTTGATTGTGGTCC
AGTTGCTAGCATATAATCAATCTTCAACAATAATTTGTCAAATTGTGGCAGGCCAAGTTTCACTAACGCAGGCCTCCATA
ACAACTGTTTCAGCACTAACTGAGTG-TTAAGTTACTTTTTTTTTTTTTTTT----------CTTCAGACAGAGCCTTGC
TCTGTTGCCTAGGCTGGAATGTAGTGGTATGATCTCAGCTCATTGCAACCCCCACCTTCCAGGTTGAAGCAATTCTCCTG
CCTCAGCCACCCAAGTAGCTGGGATTACAGGCACCCACCACCAAGCCCAGCTAATTTTTGTATTTTTAGTAGAGACAGAA
TTTCACCATGTTGGCCAAGCTGGTCTTGAACTCCCTGCCTCAGGTGATCTGCCTGCCTCAGTCTCTCAAAGTGCTAGGAT
TACAAGCGTGAGCCACCACACCTGACTGGTTAAGTTAAATATTAAAAGCTGAGGCCAGGCGCGGCGTCTCACGCCTGTAA
TCCCAGCATTTCGGGTGGCCGAGGCAGGCGGATCACAAGGTCAGGATTTCGAGACCAGCCTGGCCAATATGGTGAAAACC
CGTTTCTACCAAAAA--TACAAAAATTAGCCGGATGTGGTGGTGCGTGCCTGTGGTCCCAGCGGCTCGGGAGGCTGAGGC
AGAGGAGTCACTTGAACCTGGGAGGTGGATGTTGCGGTGAGCCGAGATTGAGCCATTGCATTCCAGCCTGGGCAAAAGAG
CAAGACTCCGTCTCAAA----AAATAAATAAATAAATAAAAGCTGATAGAGCCAGTGCCCTTATACAAAGACTGGAATAT
AACAGAAGCCCACCGAGAGTTTTGCCCAGACCTTTCCTGGGCCTTGAAGCATGACAAGATAACGAAGGAATCGATT--AG
GACCTGTTTAGGATTTAAAAAGTTGTAT-GGGGGTCTGAAGGAACTCCC-------------------------------
-------------CAAACCTTAATGATTTAGCAGGAGAGACAAGATAAGGATAATCACCCCAGCAGCTGGACCCATCTAG
ATTAAGTAAATTTACTGAGGCTCCAGAGGAAGGTCTTTAAAACTCAGACCTTAGTTACAGATTAGAAGAAGAAGTTATAT
CACTTATGTTTTTAGATGAAT---GCACAACTATACCTAGACATATAGCTTAGAAGGTATATAAGCTCTGGAAAACTTTG
TAATTTTGAGTCGGTCTGGCAATATTTTCTAGGCCTTCTCTGTGTGTGCAGTTACAGAAATAAAAACTCCCTTCTTTCCC
AGTAAATCTGCATCTTGTTATTGGGCCGCGAGAATAAGCAGCC-GACCCTTCGTTTGGTCCAGGAACAAAATCATGTCAT
CTAATATTTTAAGACTTCTCTCTCAAGACTGATATCCATTTCCTCTGTGTTTCTAGTTTTCAAGTCTCTGACATGTGTGA
TCCACT----ATT----TATCATTACTTTCTACACTATGT----------CCATACCTTTAGGCTCCCATAAATATCCTT
GGCAAACTTTCAGGACGAGACTCCCCAGAACCTTCCAGCTGTTGTGGATTCCTCTACTTCCACACCCCAATTGCTCTGAG
TATTAATTGAATATGTGCCATTATCTCCATTTGTCATCAATTAACCAAAAGAGTAGCAAAGAGGCCACTGAAAGAGGACC
CTGAATACGGGGTCATCTGAGGTCACCATATTGAAGATAAATAATTTTTGTAAATCACTTATTATGTCAATTTATAAATT
TGATGAAACA--GTCATTCACTC--TACTGATAATAAGAGCAATCATTGCAAATGTACAGTGAGTGGTGAGATTTGTTAT
ACTGCATATAAGGTAGTCAGAGCAGGTATTTTTGATAATACAACATGTAAGGAGAGAATTTAATAAAATCATACTAACAT
CAGAGAAACATTTCATGCTGAGAGAAGAGCAAATGTGAAAGCCCTGAGGCATAAATGATTTGGTGATTGTAATATTGAGG
ATGTGTTTTGGCTTGGGAAAGAAAAGCCCTGAGAGATGATGGGTCACACAAAGATCTTGGTAGAAAAGACCTCAGTCTGT
TTTCTGTTCATTGAAAATAAAGAAAAATGATAACCAATGCACAGATAAGAACTGAATTTGTCATATGACACGAACTGGGA
GTAAAGTATTTAAGGTGATTACGAAAAGACCTTATTACCAGGTAACCAAACATGTTTTCTTATTT-CTCCCCCTTTTTTT
TTTGTCCTTAACTATTTTCATCTTGCCCATTTTCTAATTGTGCACAATCAATATCCTTTCTATTT---CTACCTTTCTTA
CTTAGTCCCATTTTAACCTTCCCAATCATGCAGGGATCTGTGAACAAGACGAACCTCAGCAGCCAGGACAGGCAGGAGCA
GTGGAGAAGCTGCTATGGCTTCTGGAATCCTGCTTAATGTAAAGGAGGAGGTGACCTGTCCCATCTGCCTGGAACTCCTG
ACAGAACCCCTGAGTCTGCACTGCGGCCACAGCTTCTGCCAAGCGTGCATCACTGCGAACCACAAGAAGTCCATGCTATA
CAAAGAAGGAGAGAGAAGCTGCCCTGTGTGCCGGATCAGTTACCAGCCTGAGAACATACAGCCTAATCGGCATGTAGCCA
ACATAGTGGAGAAGCTCAGGGAGGTCAAGTTGAGCCCAGAAGAGGGACAGAAGGTTGATCACTGTGCACGCCATGGAGAG
AAACTCCTACTCTTCTGTCAGGAGGACAGCAAGGTCATTTGCTGGCTTTGTGAGCGGTCTCAGGAGCACCGTGGTCACCA
CACTTTCCTCATGGAGGAGGTTGCCCAGGAGTACCATGTAAGAGACTGGGATGGAAGGAAGAGAGGGCAGAAAATGGGAC
CTGATGGAAAATTTTCACTTTGCCTTTGACATTAATTGCCTTGTCATCATAGACCTGAGGCCTGGGATTATTTTTTT---
----------------CATGCTATGCTTAACTTCTGAGGCTTGAAGGACGGTTTTTT-----------GCATTTCACCCA
GTTACTGGAGAATAATCCTAGAGTATATATTCCTGGCCAGGAGTAAATATTTTGTACCTTGGGTTAGATGGGTAGAGATT
TGGTGTCCAAGAAAAGCTCTGATTACCCCTTTCAGCAGGAGAGTAACTGGAGTGGGTTGAGATGTAAGTTCTTTCCTTGC
TGCAGGATCAGATTTTTCTTCTAGGACAAAAAGAATCAGTCTACTCATGGTGAGGAGATGGGGAGGTCTATTACCTGAGA
TGTAGGGAGCATATTCGCCAATGTAAGTTTTCTTCCAAGTCATGGATTCTCATTGCCATTCTCACAGTTTCTGCAAATTT
GCTTCTTCTGAGCTCAACCTGATTT----CACGTTTATACTCTACCTA----GGTGCTGAGAAAGCTCATAGCTTGACTA
TGGTGTGATTCCTTTCTCACAGGTGAAGCTCCAGACAGCTCTGGAGATGCTGAGGCAGAAGCAGCAGGAAGCTGAAAAGT
TGGAAGCTGACATCAGAGAAGAGAAAGCTTCCTGGAAGGCAAGAGGATGGGGTTCCCAAAGGAGTTAGCTAGAAATCTGG
GCAGGACCATGGGAAGGAGCTTTTTTCCTCTTTATTCCCTGACACTTGATAAGTCCAGATGTCATTTGATTAGTCCTCTT
CATTCTTTCCCTGATGGGGTGTGGTGGCTGGGGAGTAAATATGCCATAATGAACACAGACATCTTTAGGGAGCTGTTTAC
ATGAAGGATCTCTCTGGTAAGGATGGCTAGTGAATCCTGCATTCTATTTTTGTGCTACTTTCTGAGTCCATGACTCTACT
TTGGGAAGACATTTGGCAGTGGCTCATGATTCTGTCCTCAATGTCCAACTTTTGGCAGGGAGTTTGAGCTTGGGCTGATA
AAAGTAATATAGGCAGGCATGAGTGTCCTGGACAGCTGCGTGAAAGGCAAGCTACATCCAGGTAACCCATTTTGACTCAG
AATGAACCT---CAACATACCCATTCAAGGTCATTGTTTTAAAATGTCATGAAGGAAAAGAAA---TAGGAAAA-TCAGC
TTTCCTAAGACCTACTCTCCTGCTACTGTGTCCCC-CTTTGTGAAAACTCCCCAAAAGAAACAGTTCTTTGTCTGACTAA
CAGCCTCTGCCTGGTAGACTGAGTGCCCCTTTCTCTTCTC--ATCTCTGAAGATTCAAATAGACTACGACAAAACCAACG
TCTCGGCAGACTTTGAGCAACTGAGAGAGATCCTGGACTGGGAGGAGAGCAATGAGCTGCAGAACCTGGAGAAGGAGGAA
GAAGACATTCTGAAAAGCCTTACGAAGTCTGAAACGGAGATGGTGCAGCAGACCCAGTACATGAGAGAGCTCATCTCAGA
ACTGGAGCATCGGTTGCAGGGGTCAATGATGGATCTACTGCAGGTAAAAAGGGGAAAGAAGCCTGAGCATTGAGATTAAA
GAAAAGTGAAGGCTATTTCCTTTTCTGTGTTGCTGTGCTCTTTCTAATACTAACAGTGTTCCCTGCAGGACCGCTTTTCT
GAAT------------------------------CAGTTGCTGAAGTTATAGGAATAATTGAATGTAGAAGTAACAAGAG
ATAATCCCATTTTTATTAATTTATCCCAGAGCAGTACACAAATTTGACATAGTAGAGATGATCAATTAGCTCTAGTTATG
TTTGATGGGTTCCTATTCTCTGTAATCCAGTGTTGAGCCCTTATCAGTGCAG-TTTTCATTGCTTAGCTTAGCCACTGGC
AAACAAATACACGTCAAAATACAAGATGC--TTTTTATTGTTTCCCTTCATGAAATTAATTGAGA-CTTTTTCCTCTTT-
----ATTTTCCGGAAAAAAAA-TAAATAACTGCTATCAT--CTTCTTTATATGCTGAATAGAATTCACTAGTAAA--GGT
CGGGCACGGT----------------------------------------------------------------------
----AGATCATGACGTCAGGAGATCGAGACCATCCTGGCTAACACGGTGAAACCCCATCTCTACTAAAAA----------
--------------------------------------------------------------------------------
--------------------------------------------------------------------------------
--------------------------------------------------------------------------------
--------------------------------------------------------------------------------
--------------------------------------------------------------------------------
--------------------------------------------------------------------------------
--------------------------------------------------------------------------------
--------------------------------------------------------------------------------
--------------------------------------------------------------------------------
--------------------------------------------------------------------------------
--------------------------------------------------------------------------------
--------------------------------------------------------------------------------
--------------------------------------------------------------------------------
--------------------------------------------------------------------------------
--------------------------------------------------------------------------------
--------------------------------------------------------------------------------
--------------------------------------------------------------------------------
--------------------------------------------------------------------------------
--------------------------------------------------------------------------------
--------------------------------------------------------------------------------
--------------------------------------------------------------------------------
--------------------------------------------------------------------------------
--------------------------------------------------------------------------------
--------------------------------------------------------------------------------
--------------------------------------------------------------------------------
--------------------------------------------------------------------------------
--------------------------------------------------------------------------------
--------------------------------------------------------------------------------
--------------------------------------------------------------------------------
--------------------------------------------TACAAAAAATTAGCCAGGTGTGGTGGCAAGTGCCTG
TAGTCCCAGCTACTTGGGAGGCTGAGGCAGGAGAATGGCGTGAAGCCGGGAGACGGAGTTTGCAGTGAGCCAAGATGGCG
CCACTGCACTCCAGCCTGGGTGACAGTGCAAGATTCCATCTCAAAAAAAAAAAAAACAACGAAAACTGCTCTCATCCCCA
TTTTCATGATGTTAACTGTAATTGTTAACTATAATTGCCACATTGTGCAATAGAGCTCTTAAAGATAGTCTTCTTTTCAT
TCTGAAGTTGGTATCCTTTTACCGACATCGGCCTGAACTCTCCCTACACCCCAGCTCCTGGAAACCCATCTTCCACTCTC
TACTTTTAT-----------------------------------------------------------------------
--------------------------------------------------------------------------------
--------------------------------------------------------------------------------
--------------------------------------------------------------------------------
---------------GAGCTCAACTATTTTTTACATCTACATACTAAGTGATATTATACAGTATTTGTCTTTCTGTTCCT
GACTTATTTTACTTAAAGTCCTCCATGGTGTGAGATAGTCTTCTGCATATGGCTATCCAGTTGTTCCAATACAGTGTATC
GAAGAGA-------CTGTCCTTCCCTCAATGAATGCTGTTACCACTGTCAAAAACTAACTGATCATAAAGGTATGAATTT
TTTTCTGGGTTACTATACTGTTCCATTGGTCTATGTGTCTGTTTCTAATGCTAGCACTATACTGTTTAGATTACTATAGC
TTTATAATATATTTTGAAGTCAGGTA---TGATGCTTCCAGCATTATTCTTTTTGTTCAGGATTTCTTTGGTGATTTAGG
GTCTTTTCTGGTCTCATACAAACTTGAGGGGTTTTTTTTTT--------GTATCTATTTTTGTAAGAAATGTCAGAATTT
CAGTAAGGATTGCATGGAATCTGTAGATTACTTTGGGTAACATGTACATTTAAGGATATTACAACTAGACTACCACCATA
TTACAACTCATCATTACAGCAGCCTTAGAGCAGGCTTATAAGAGGTCCTAAAGGGAGTGCTAAACATGGAATAGAAAGAA
CAAC---TGATACAAAAAAAAAACACACACACACACTAACGCACATAACCTACAGACAATATAAAACAAGTACACAATCA
AGTCTACCTAACAGCCAACGAACAGCATAATGTCACATATCAATACTAACCCAGAATGTAAATGAACTCAATCCCCTACT
TAAAAGACATAAAGTGGCAAAAGGAATAAAAAGATAAGACTCAACCCAGTCTGCTGTCTTCAAGAGACCCATCTCACATG
TAATGACACCC----ACAGGCTCAAAGCAAGGGAGTGGAGAAAGACCTAATGGAAATGGAAAACAAAACGGAGCAGGAGT
AGCTATTCTTATATCAGATAAAACATACTTTTTAAAC-AATGACAACTAAGGACAAAAAAGAGCAAACATGATAAAGGGT
ATCATTCAACAGGAAGACTTAACCATCTTAAATATATATGCACCATAGGTGGGAACACTCAGATTCACAAAACAAGCTTT
TCTTCACCTGAGAAAAGACTTAGACGACCTCACAATAATACTGGGAGACATCAACATTTCACTGAAAGCATTAGACAGAT
CATCAAGGCAGAAAACTAACAAAGAAACTCTGGACTTAAACATGACCCCTGACCAACTGGATCTAATACACATCTACAGA
ATACTTCATGAAACAACCACAGAAAACACATTTTTCTCATCTGGACCAGAACATATTCTATCATCAGTCACATGTTGGGT
CATAAAGCAAGTCTCAATATATT----AAACAAACAAACAAACAAACAAACACTGGCCAGGCACGGCGGCTCACGCCTGT
AATCCCAGCACTTTGGGAGGCCGAGGCGGGCGGATCACGAGGTCAAGAGATCGAGACCGTTCTGGCCAACATGGTGAAAC
CCCGTCTCTACTAAAAATACAAAAA-TTAGCCAGGCATGGTAGCGGGCGCCTGTAGTCCCAGCTACTCAGGAGGCTGAGG
CAGGAGAATGGCGTGAACCCGGGAGGCGGAGGTTGCAGTGAGCCAAGATTGTGCCACTGCACTCCAGCCTGGGCGACA-G
AGCGAGACTCCGTCTCAAAAAAAAAAAA----------------------------------------------------
-------------------GAAATCAATATCAAGGAGACCTCTCAAAACTACACAAATACATGCAAATTAAACAACTTGC
TCCTTAACAACTCCTGAGTGAATACTGACATTAAGGCAGGAATCAAAAAA-TTATTTGAAAACTATAAAAATAAGAACAA
AACTTACAAAAATCTCTGGCATGCAGCTAAAACAATTAAGAGGAAACTTTATAGCACAAAGCACCTTCATTAAAGAGTTA
GAAAGATTTCAAATTAACAATCTAACTTTCCATCTAGAAGAATGAGAAAGAAAAGAATGAACCATTCCTCCAAGGTAGCG
GAAGAAAATAAATAAGTAAAACTGGAGAAGAACTGAATAAAACTGAGGCACAAAAACCCATGCAAAAGATTACTGAAGCT
AACAGTTTGTTCTTCAAAAGAATAAACAAAACTGGGTTTTCAAATTTGTTGTTTCCTTATGTTTATGTCTATACGTTTGC
AGAAGGACATAATTTAGTTTCTGTGCACTGGCTTTGTTTGTTTTCCGAGATTCTAGGCATACTGTCTGCTATGGTTCAAG
GGCAAGCTTGCTGCTTCAGCGTTCAGGCAGGGTGGCCCAGAGTCAGGAGGTGGCCAGGCCTGGCAGCTGACTCTACGGAG
TTGGACCTATAGCCTGGGTCCATGACAGTGAGCCTAGAGCCTGTATCTCTGGGGGCTATCCTGAATCCTCAATTCACAGG
TCTTGATCTGATACTGCAGCGGGCCTTGAGCTAAAGTTAGCAGAATCTGGCCAGTTCATGGCCTCTGATCTGGCACTAGG
GTCCACTGGGAGTGGACCTGGATCCTAAGTATACTGGAGCCCAGTCTAGACT--TTAGGTCCTCTGGAGCCTGGGTCAAC
AGTGACCCTCCTGGTGCTGGAGCCAGTGTTTAGTCTGGGTTTGCTAAGGCAAGTCCGGAGCCCAAGATCACAGGCACTGA
CCTGGTGCCTGGAGCCTCTGTCCCTTGGTGCTAGAATAGAAGCTGATTGTGCAGGTGCTATCCTAGAGCTTAGGTCCACA
AGTGCAGACCTGGGTCCTGAGGCCTCAGGGGCTGGCCTGGAACAAGGATACACAGTAGCAGAGCTGGAGCTGGATGCAGT
CCAGCAATGTGTTCTATTTGGACAGGCTTTACGTTCGGTGTGCTGGAGCAGGCCTGGATTCTGAGTCTGCTGGCTCATGG
ACTCACAGGATCAAGCCTGGAGGGTAAGGCCATGGGGGACTGGCCTGGCACTGAACAGGCCTGGAGCCTGTGTTCTCAAA
TACCTACCTGGTGTTTGTGGCCAAGGGTGCTGAGCTGGCACTGTAGTGGGACTGAAGCCTGGAGCCATAGGGGATGCTGT
GGTGTTGGGTGGGCCTGTGTCATATGTCTGCAGGAGCTAAGCTGAAGGATGTGTCTGCAGGTACCCATGATGACTAATAC
TGTGGAAGTCAGTGTGATGCTGTGGCAGACTTAAAGCCTGGGGCCATGGAGACCAGTTGGATACTGGAGGCAGTTTGGAG
CCTGGGGCCACTGGGGAAAGCCTGAACCTAGGCCGTGCTACAAGGCTGATTCTGTGGGGGCTGACCTGGCACCAGGGCCA
GTATGCACCCTGGGGTAAACCTGGCTCTGGGGCAGGATTATAGACCGAGTCCATTGGGCAGGACTTGAGCCTGAGGCTGC
GGGATACTGTGTGGCATAGGGTTGGGCCTGGAGATTTGGTCCGTGGGTACTGGCCTATAGCCTGTATATGCAGGGACTGA
ACTGAAGGCTAGGTTCAGAATTGTCAGCCTGATAACTAGGGATACAGGGCTAGATCTGGTGCTGGTATGGGCCAGAAGCC
TGTGGCCATCAGGGCCTGAGGTCAGCCTGGCTGTGGGGCCAATCTGGAGCCTGAGGCTATTGGACTGTCCTAAAACTGAG
ATTGGTCCTACCACTGAGGGCAACCTGGCATTTAGATGGCCCATAGACTGAGTCCACTGCACAGATCTGAAGCCTAGGGC
TGTGAGATACAGCCTGGAGGCTTATCCGTAGGTACCAGTCTGGAGTCTGATGCCTTCAGACCTGCCAGACAGGGTTTTAC
TAGATTGAACCCAGTGTTAGGGCCTGAGGC-----------CTGATTTTCCCCTCTTTCTCCTTGTGGGGGTTACCTCTT
ACATGCTGTGCTGCCTAGAGTTGTAAGAGGGGT--------------GAAATGGAAAATGTAAAACTGTCCTTCCTACAT
TCTTCCATGAGTGTTTTTCTTATTTCTGTGCTATACCCAGATGCTGTAAGCTCCTACTCTATTTCTTAGTTCTGGTGAGG
TGTTTTAGTTCTTGGATGGTGGTTTAAATTGTTTTTGCGAGGAGACAACTGCTAGAGACTCCTATGATACTATTTTGCTG
ACACCCATCTGCAATTCCTTTCATTTCTATCTACAGCACACACACTTATGTCTCCTCTTTTATTCCTGATTTTGGTGATT
TTGTTTTCTCTCCCTTTTTT-GTCCTTTCAGTTATAATTGGGTTAATTTTATTAACTTTTACGAGATTAAAAAGGCTTTT
TGCTACATTGATTTTTATCTTTTTTT-AAGCTTTCTGTATCGTTTCTGCTCTGATCTTTATTATTTCATCTTTTTCATTG
AGTTTTTTGTTGTTGTTCCTTTCCTAATGTC-CTAAGGTGAAATCTTAGATACTGTGAAATCTTTTTTTT--CTGATATA
GTGTTTATTCAGTGAATTGCTTTAACTGTATCTCATACATTTTAATTTTTGAGTTTTCATTCAGCTCAATGTATTTTCTA
ATTTTCTTTGTGATTTTTTGGTTTTCTCTTGGGTTATTCAGAAAAGTAGTGTTTAATTTTAAAGCATTTAAGAATTTTTA
AAATGTTTCTTCTGCTGTGGATTTCAAATCCCATTCCTTGGTAATCAGATAACTTGT---ATCATTTGTTAATGTATTAA
AACTTA----ATGGTATGGAACATTACATGAGCAGGAAAATGTTTTATATGCATTTGAAAAGAATATGTATTTTGCACTC
ATTTGGTGAAATAATCTAAAGATGTCCATTAAGTCAAGCTAACTGATAGTGTT-GTCTTCTATATCCTTTATGGTTTTTA
TACTAGCTTTTCAATTAATTACTGAAAGTAAATTATTGAAATCTTCACCAGTTGTTACTGAGTTGTCTGTTTTCCATTTT
TTAATTCTTTATATATTGTTTTTAGTATTTTGAAGCTCTGTTGTTAAGTGAAGATACACTAATATTGTTATTTCCTCTTG
ACATATTGAAACTTTCTTTCATTATGAAATATTCCTGTTATTCTCACTTAGCAGTTCTTGCCTTAAAGTATCTTTGGTCT
AATATTAATATATCTACTTGAGTTGTCTTATGGTTAAAGCTTTCATAGTATATATATTTT-ATTTCTACTTTGGGTTTAT
TTATGCCTTTGAATCTAATATGTGCTCTTCTATAGGTAGTGATAACTGAATCTTCTTCTTTGCCCAGTCTGTCTGACAGT
CTCTGACTTTCCATTTGGGTTTTCATTATAACATTTAATGCAATTATTGATACAGTTTTACTTAAATTTACTATTTTGCT
ATTTGTTTTCTGTATTTCTGCTGTCTTTTTTGATGTTGTTATCTTCTGCATCCTTAACTGGCTTCGTTTGTGTTAAATAA
ATATTCTCCAATGTCTATTTTTAGTTTTTCTCTTTTTCAGCTGTATGACATTAGTATTCTTCCTAGTGGTTGCTTTAATG
ATTACAATATGCATCTTGTCCTATCACAGCCAGCTTCTGATTAATGGTAACTTAATTCCGGTAAAATACAGAAACTTTCC
TTCAGTATTGCTTCATTTTCTTCATCTTTGGTTATCATTTTGTCATATATCTCACATGCATATATGTTATAACCTATTAA
TATAGTATTGAGTTACTTTGTAATAAACTTAATGTCTTTTGAAGTTATTAAGAAAATACTTTGGGAAATAAACTATAGAT
TCTTTTATCTTAACTCACATTTTATAGTATTACCATTTTGTTTAGGTT------------GAGTAAATCTTTGGAGGAAA
TTAATTTCAACTGAAGAAAATTTAAAAAATATTT--GGGAAGAAATATTTATGGGAAGAAATATTTTGCAGGAGCTCACA
CCTGTAATCCCAGCAATTTGGGAGGCTGGGGCAGGTGGATCACCTGAGGTCAGGAGTTCAAGATCAGCTGGCCAACATGC
AGAAACTCCATCTCTACTAAAAATGCAAAAATTAGCTGGGCATAGTGGCACGTGCCTGTAATCCCACCTACTTGAGAAAC
TGAGGCAGGAGAATCACTTGAACCTGGGAGGCAGAGGTTACAGTGAGTTGAGATGGTGCCACTGCACTCCAGCCTG---A
ACAGAGCCAGACTCCGTCTCAAAAAAAAAAAAAAGAAAAAAAAGGAAAAAACATTTTTTCTTCCATCTTCCAGCAACAAA
TTCTCTCAGTCTTCATCTGAGAATATTTTTT-CTTCATATTTGAAGAAAATTTTTGCTTTATATGGAGTTTGGAGTTGAC
AGCTTCTTTTAGTGCTTTCAATAAGTCAATCTAGTCTTTTCTGTCATCTATTATTATTTAGATGAGAAGTCAGCTATTAA
CCATATTGAAAGCATTCCTTATATAATGATTAATTTTTCTCTTGCTCCTTTAATTTTTT-CTTTGCTTTGATTGTAGCCT
TTGGAAATTTTTCTATGATATATGGATCTC--ATTAGTTATTTAACTTGGGGTTCATTGAACACAGATGAATATATTAAC
ATAGATGAAATATTAATTTTTATAGAATTTAAACTATTTTTCCCCAATTATTCTTTTCTACTTGAAAATGTAGCAACATA
CATGTAATAGGTCTTAAAACAGGTTTTAGAAATCTTTTCCTCTCTTCTTTCCTTCTGGAAGACCTATTACATGTACATTG
CTACATTGCTACATTGTGACATCTGACATGTCTTTGAGGCTATTTTTGTTTTTTAAGTCTTTTTTCTCTCTGTTCTTTAA
ATGAGAAAATTTTTATTGATGCAGCTTTTCAGGTTCAACGATCTTTTTGTGTGCTGTGGAGCACTTTTAGCAAATATTTC
ATTATTGTTATTTTACTTAAAATTTTCAGAATTTTTATTTCCTTATTATTTCTCTCTCTC--AAGCGTATCTATTTTTTT
GAGTCATTGTTTTT-ATACTTCAATCCTTTAAGCATAGTTCTCCTTAGTTTTTTAACCTATTTGCAATAGTTGCTTTGAA
GTCTTT-ATCTTCTAGTTCCAACATCTGGGGTCACTTGAGGATATTTTCAATTTATTGTTTTG-GGG-TTTTT------G
TGTGTGTGTGTGTGTGTGTGT-GTTTTTT----AAATCCCCC-GAGCTGTGGTATTCTATCTTGTTC----------CTT
TGTATTTGTATACATTTCTTTTGTAAATAT-AAAATATATATATATATA------TTTTAGACAGAGTCTCACTCTGTCG
CCCATGCTAGTATGTAGTAGTGCGATCTTGACTCACTATAGCCTTGACCTCCTGAACTCAAGCAATCCCCTCACCTCAGT
CCCCAGAGTAGCTGTGACCATAGCTCCACACTACCATGCTCACCTAATTTTTGTATTTTTTGTAGAGATGGGATTTCACC
ATGTTGCCCAGGTTGGTTTCAATCCACTTGCCTCAGCCTCCCAAAGTCCTGGGATTACAGGAATAAGCCACTGCAGCTGG
TCAAAATGTACATATTTGTTACTTTGTAGTTTCTGAGATTTCCCATCCTCTAGTCTCTACCCAGCAAGAAGTGTTTCTGT
ATCTTCATTTAGTTACTTCCTTATGGTTGCTACTGTCTCTGCTGTGTTTAAAGAAAACTCAAATATAATTTTTAAGTTTG
ACATCCTAG-----------------------------------------CTCGAATAGAAGTTATGTTCAATCCCCTCA
AGGCAGTAAGGCTTCTGTCCTCTCCTGATGAATCTGTGCTTGGGTTAGTGAGATTGTCCAAATTAATTCAAAGTTAAGGC
TGTTTTGAAATCTGCTACAATTTACTCACTGATATGTTGTTTCACTTATCCTTT-CCATATGTGTGTGTCTTTAGCATGG
CCAGGGTTGCATATAACTTACTTCTAGTTAAGTTAATATATGTAATTCCTGTTGTTTCCAGCCACAATGCAGTAGTGCTT
TTAAGATGGGCATCTGGGCTGGGCGCAGTGGCTCGTGCCTGTAATCTTAGCACTTTGGGAGGCGGAGTCGGGCGGATCAC
---GTCAGGAGATGGAGATCATCCTGGCTAACACGGTGAAACTTTGTCTCTACTTAAAAAAAAAAAAAA-----------
-TTAGCTGAGCGTGGTGGCGGGAGCCTGTAGTCCCAGCTACTGGGGAGGCTGAGACAGGAGAATGGCGTGAACCTAGGAG
GCAGAGTTTGCAGTGAGCCGAGATCGTGCCACTACACTCCAGCCTGGGCGACAGAGTGAGACTCCGTCTCAAAAAAAAAA
AGAAAAAAAAAAAAAAAAAAGATGGGCACCTAATCCAACACAGACAAATGCCACGCAAGCC-TAAAAGTTTTTTATGTTA
AAACTTAGAAG-----TTCTCCTTTCTGCTGGGGTTTGTATCAGGAGAGTTACATTTCCTTCATGTACAGAGAATAAACT
CAATGTAGAGGAATAAGTAGAATTTGGAGAAGGACACTGATCACATTTTTGTTTTTTGTTTTCAGATGGAGTCTCACTCT
GTCGCCCAGGCTGGAGTGTAGTGGCATGATCTTGGATCACTGCAACCTCCGCCTCCTGGGTTCAAACAATTCTTGTGCTG
CAGCCTCCCGAGTAGCTGGGATTATATAGGCATGCATATTTTTTGAAGAAACAGGA------------------------
--------------------------------------------------------------------------------
--------------------------------------------------------------------------------
--------------------------------------------------------------------------------
--------------------------------------------------------------------------------
--------------------------------------------------------------------------------
--------------------------------------------------------------------------------
--------------------------------------------------------------------------------
--------------------------------------------------------------------------------
--------------------------------------------------------------------------------
------------TTTCACCAGATTGGCCAGGCTGGTCTCGATCTCCTGACCTCAACTAATCTGCTCGCCTTAGCCTCCCA
AAGTTCTGGGATCACAGGTGGGAGTCACTGTGCTCGGCCCATAGACCAGATCTTGATG--ACAAGGTTTGAGTTTCAAAA
TTCAGCTATGACTGAAGTTGTAATTGCCCTTTCCAAAATCCTTTTCACCA-----------------------------T
TTAATCCAGTTTTATTTGGTTTATGTTACATACAACATAAAAGTACCAATACAAAAAAGCAAAACTATTTGATTGTATGT
GTAGATCCAGCTATTGGCTTTGTTCTTGAAAAAAAAATCTATGTGGAAAAGTTATGTCTGGCATAAAGGAGACCAAAGAC
ATTTCATTCGTCCATATCTGCTAAAACAAAA----CAATATTTGTG---ATAAAGAGCAGTAGATGA-------------
--------------------CCTAAAACCATTAAGAATGTAGACTAGCCAGGTGCAGTGGCTCACACCTGTAATCCCAGC
ACTTTGGGAGGCTGAGGCAGGCGGATTGCCTGAGGTTGGGAGTTCGGCACCAGCCCGACCAACATGGAGAAACTCCGTCT
TTACTAAAAATACAAAAA--TTAGCCGGGCCTGGTGGCACACACCTGTAATCCCAGCTACTCAGGAGGCTGAGGCAGGAG
AATCGCTTGAACCGAGGAGGTAGAGGTTGCGGTGAGCCGAGATTGCACCATTGCACTCCAGCCTGGGAAACAAGAGTGAA
ACCCTGTCTCAAAAAAAAAAAAAAAAA--GAAAAGAAAAGAAAAGAAAAAATAGAACGTACGCCAAACTGACCTGGTAGA
GACTA--GAGTTCAGAGTAAATGTAGTTTTTAGGACAATGACTGAGTAGATATTAGTAATATTATGGACAATGTGGTATA
AGAGAGAAGACAGTATGGTTCGTGTTATATAATAAAAATTCTTAGTTGTTGATCCTTGTTGCTCCTTCACTACTGAATAC
ATTAAACTGCATTTAAGTGACAAACCTGGGTAAAAGTAGAGAA------A-TCAATTGCATATATGTGTGT--CAAACTT
AAGGAAGTAAATGAAGTCAGTTACAGTTCATGTCTAAAATGAA--GAGAGCAACCTTAAAAAGTACGTAGGCCGGGTATC
ATGGCTCACGCCTGTAATCTCAGCACTTTGGGAGGCCGAGGCAGGTGGATCACTTGAGGTCAGGAGTTCAAGACCAGCCT
GACCAACATGGTGAAACCCCGTTTCTACTAAAAACACAAAAAATAGCCAGGCATTGTGGTGGGCGCCAGTAATCACAGTT
ACTCGGGAGGCTGAGGCAGGAGAATGGCTTGAACCCAGGAGGTGGAAGTTGCAGTGAGCTGAGATCACGCCACTGCTCTC
CAGCATGGGCAACAAAGTGAGACTCCTTCGGCCGGGCGCGGTGGCTCAAGCCTGTAATCCCAGCACTTTGGGAGGCCGAG
ACGGGCGGATCAC--GAGGTCAGGAGATCGAGACCATCCTGACTAACACGGTGAAACCCCGTCTCTACTAAAAAATACAA
AAAACTAGCTGGGCGA------GGTGGTGGGCGCCTGTAGTCCCAGCTACTCGGGAGGCTGAGGCAGGAGAATGGCGTAA
ACCCGGGAGGCGGAGCTTGCAGTGAGCCGAGATCCGGCCACTGCACTCCAGCCTGGGCGACAGAGCAAGACTCCGTCTCA
AAAAAAAAAAAAAAAAAGAAAAGAAAAAGAA-GAAAGAAGGAA-GGAAAGAAAAGAAAAGAGAAGAGAAGAAA-------
-----------AGATCTACACTTGTTTCGTACACTTGTTTGCTTATAACCTCAGCAAAAGCCACATAAACATCTTGAGCA
CTATTATTCATTCATCTTTGATTCTTCAAAACGTGACATAATGCCTGCAGAATAAGTTTATATATAA--GCTTTGTTGTT
TATTTTTGTG---------ATTTTGTTTT----TGTTT-AGAAATGGGGTCTTACTCTGCAACCCAGACTGGAGTGCAGT
AGTGTGATCCTAGCTCAATGCAGCCTCAATCAAACTTCTGGGCTAAAGAAATTCTCCCACCTCGGCTTCCCAAGTAGTTG
GGACTACAGGTTCATGCCACTATGCTTGGCTAATTTTTTT--GTTTTATTTTTTGTAGAGATGGGGTCATGCCATGTTGC
ATAGGCTGTATATCTGTTTAAGAAATCAAAGAAGC---------------------------------------------
--------------------------------------------------------------------------------
--------------------------------------------------------------------------------
--------------------------------------------------------------------------------
--------------ACTAATTATTTAAATCATTTCATGGAGAGCCATATACGTTTGGAGAAAAAAACAA-TTGGCAGTCA
CTTCTTTCCCTTCTAAACATGTCCCATC-----TGCAGAAACCAGAAACCTCTTCCACAAGGATGAAAGCTATTTCTGCT
TTTAAGGGAACTTGAAAACCTCACATGAGTCTTCTGGGATGATTGCC--CTGAGT-------------------------
--------------------------------------------------------------------------------
--------------------------------------------------------------------------------
--------------------------------------------------------------------------------
----------------------------------------CTTATCTGTGCTTTTTT-GTCTTTCACACTGTCACCATCT
CCATTCTCAGCACATTAGGGACTGGGGGAAATATGATGAAGCTTTCTAAGTGAGGAGAGACTATTTATTTCTTAATTGAT
GTTTTCTCTCTTCTTCCCAGGGTGTGGATGGCATCATTAAAAGGTATGTGTGGGAGGACAGAGATGGT--CCTTTTGTGC
AGTGAGGAGAGATTTATAGCCATTA-------------------------------------------------------
--------------------------------------------------------------------------------
--------------------------------------------------------------------------------
--------------------------------------------------------------------------------
------------------------GAATTGTCCTAGGTTTAATTAGAATAAAACATCTCCCAGGGCAGAAAAATTTTGAT
ATTGTTGTATCAT-----------AAATTTCTGGTCACAAATCAGCATTTGAATGTTCTGTAACTA--------------
--------------------------------------------------------------------------------
--------------------------------------------------------------------------------
--------------------------------------------------------------------------------
--------------------------------------------------------------------------------
--------------TTAAGAATAGCCCAGATTTGGCCAGGTGTGGTGACTCAAGCCTATAATCCCAGCACTTTGGGACGC
CGAGGCAGGCAGATCA----------GGAGTTTGAGACCAGCCTGGCCAACATGGCAAAACCCTGTCTGTATAAAAAAAA
AAAAAAATACAAAAATTAGGGGGA-TGTGATGGCACACGTCTGTAATCCCAGCTATTTGGGAGGCTGAGGCATGAGAATT
GCTTGAATCTGGGAGGCAGAGGTTGCAGTGAGCCAAGACCGTGCCACTGCACTCCAGTCTGGGTGACAAAGTGAGAGTCT
GTCTTAGAAAAATCAA-TAAAATTAAAG--AAAA---TTAAAGAAAAAAAAA-GGAATAGACCAGATTCTATGGCAGAAA
ATTTGAGTGGTGGAGACTC--AGTGTGGGTCAGTAGTGGTTTCAGGGATAAGGTGTTGCAGTATCAGACCCCTGTGCCAT
CACTATTTTACTACCTACATCTACTTCTGTTTCTGTATTTAATAGGTACTTGACTTATTTTGGAAGGGCCATATCTTCTT
TTTCTGCCATATACCCCTAATTGTACATTGGGACAATTCCCAC--GTTTATATTTTCCTCCTGGAAAAAGA---------
--------------------------------------------------------------------------------
--------------------------------------------------------------------------------
--------------------------------------------------------------------------------
-------------------------------------------------------CCAGTTCCTTCTTCATTTATATTTA
GATTTCCAAAATCAGATGTTTATTTGTGGAATAATATTTCAAAATAATATTCTGGATAATATGTGGTCATGGTACAAAGA
ATTGATCCATCTCAGTTGCACTCTTTAGAAGAGCATAAAAAGCTGCTATTCTTGTGTCTAAAATCGCATACCTCG-----
-------GGGGTATCAAGTTCTTTCTAACCACATGAAATTCAGGCTAGTAC--GTTTGGTGC--ACATAATATCTCATTT
GCCAAGTGTTTGTAATGTTTCCCAGAAATCTGAAACCCTAGCTGTTATCTGAGTACCTCCCTGCTGAGAATAGCTTTGAA
AGTCTTAGGCCTCTCCAAACAGGACTCCTCTCTTGATATGTCTCAGA--CACCCAGGAGCCAGGTTCGCCAGGTTCTGCA
ACCTCCCTTTCTAACCATCTCCCTGGGAACTCA-CATACATAGCGATGATGTTTCCACACATTAAATGTTAGGGTTTCTT
CTGTAAGGCACCAAAGTTTTGTTTTGTTTTAAAATCC---------------------------------TCCTTTTTTT
TTTTTTTTTTTTATGTTATATGAGTTTAAAAATGTAGACAGG--------------------------------------
--------------------------------------------------------------------------------
--------------------------------------------------------------------------------
--------------------------------------------------------------------------------
-------------------------GAGAGGTTAATTATTTCATTTTAGAAGGAAGACACTGTG-CTTCTGAGAGGTTAA
ACTCTTCCCACGTTCTCACAGAAAGTAAGTGGGAAGGTAAACAGGAGAATATTTTGTTTGCCATCAGGGTCAA-------
--------------------------------------------------------------------------------
--------------------------------------------------------------------------------
--------------------------------------------------------------------------------
-------------------------------------------------------------------------GAGTGTG
CACTCTCCCTTCTCAGGATCCCCAAGAAGAGAGTTCA-CTGCATCAATGGGCTGAAATGATAGGGAATCAGGGGTGTTCC
AGGGACACAAGGTCAGAGGTTTGGAAG------CATTTTTTTTTCTTTTTT-AACTCTTAGGATTGAGAACATGACCTTG
AAGAAGCCAAAAACTTTTCACAAAAATCAAAGGAGAGTGTTTCGAGCTCCTGATCTGAAAGGAATGCTAGACATGTTTAG
AGGTGAGGAGAGCTGGATCAACAACAGGGTTGTGGAATTCATGTG------GTGTCAGGGTGCTAAATGGGGAAGAGGGT
GCAGTTTCCAAATACGGATAGAGGGTATAGGGGAGGATGGATATTGTCTGCTGCTGATGGGATTATATTTAATGGGAAAT
GGCTAGGTGGCTGCTTCATCCCATCATTCAGCAATTTACTGCCC---TAATATAGGGCATA------CTTTTCCAAATCT
GGAGACAAAGTGAATTTCAGTGCTGACTCCTTT-GCTTGTATTCAATATTATGTATTTTTATAATTTCAGAGCTAACAGA
TGCCCGACGCTACTGGGGTAAGGAGAAATCACATTATCATCAGCCACCCTGTGGCTTATCA--------TTATTATTATC
TTTATCTTTTA-GAATTTTATATT--------------------------------------------------------
--------------------------------------------------------------------------------
--------------------------------------------------------------------------------
--------------------------------------------------------------------------------
--------------------------------------------------------------------------------
--------------------------------------------------------------------------------
--------------------------------------------------------------------------------
--------------------------------------------------------------------------------
--------------------------------------------------------------------------------
--------------------------------------------------------------------------------
-CTCTGTTAGGTCTCGTGTTTTAAGATTTATGATTCTCCTTCCAACACATAAATAACTTACCCCTCCT------------
----------TATAACTTCTGAACAAGTTTCCTCCCAGTTTTCTCTCAAGTCTTTATCAAGATTTCTCTCATATCACA-A
ATAAAGTCACATTATATCCCCTAACTGACCTGTTAATTTTTCTACAGTTGATGTGACACTGGCTCCAAACAACATTTCGC
ATGCTGTCATTGCTGAAGATAAGAGACAAGTGAGCTCTCGGAACCCACAGATAATGTATCAGGCACCAGGGACATTATTT
ACGTTTCCGTCACTCACGAATTTCAATTATTGTACTGGCGTCCTGGGCTCCCAAAGTATCACATCAGGGAAGCATTACTG
GGAGGTAGATGTGTCCAAGAAAAGTGCTTGGATCCTGGGGGTATGTGCTGGCTTCCAATCCGATGCAATGTATAATATTG
AACAAAATGAAAATTATCAACCTAAATATGGCTACTGGGTTATAGGGTTACAGGAAGGAGTTAAATATAGTGTTTTCCAG
GATGGTTCCTCACATACTCCTTTTGCTCCTTTCATTGTGCCCCTCTCTGTGATTATTTGTCCTGATCGTGTTGGAGTTTT
CGTAGACTATGAGGCTTGCACTGTCTCATTCTTCAATATCACAAACCATGGATTTCTCATCTATAAGTTTTCTCAGTGTT
CTTTTTCTAAGCCTGTATTTCCATATTTAAATCCCAGAAAATGTACAGTCCCCATGACTCTGTGCTCACCAAGCTCTTGA
ACCTTCTTACACACTCAGCCCCTTGTGTACAGCACCTCTTGTCCATGTGCATCTCATACACCTGAACTCAGTTGCATCAT
TTTAACCATCTTTTCCTTGCTGTCTCTATTCTTTCTATTTGAACGTCCTGCACTCATCAGTGAAATGTGATAATTATCTT
GTGCCATATTCTCCCCAATATTTTATTGACATTTGATAGCAATTGTTTT-CATCATTTTCCATACTCCCAAGGAAAACTG
ACCTATACCTCATAAAATGAGACCACTATTTAGGTATTACTTCTGCCAAATATTTATCATCCAGTTGCCTCTGACACTGA
CTAAGAAGATGAAAAAAAGCTTTTCAACAGCCTTTCT-----ATATCATCGTGTGATAGTTGTTCACCAATGAATGAGTC
CTTAGTCCTGTGTCAGTTTACCCTTGATGCCCTTATTTGTGAAAGAGTTAAAGAGAAAATATCATAAATGGTATACTCT-
AAGTGTAGAGGTTTTGTATCTAGAGGATCTGAGTTCAACTCCTGT------------CTCTCCATGTACTAGCAGTATAA
CTGTGAATAGCATACTTAAATGGCTGTACTTCTTTTCTTTTCTTT-CTTTTTTTTTTTTTT-----------GAGATGGA
GTTTTGCTCTCATTCCTCAGGCTGGAGTGAAATGGTGCGATCTCGGCTCACTGCAACCTCCGCTTCCCAGATTCAAGCAA
TTCTCCTACCTCAGCCTTCCAAGTTGCTGGGATTAGAGGCGCCCACCACCACCCCCGGCTAAATTTGTATTTTTACTAGA
GACGGGGTTTCCCCATGTTGTGTTGGTTAGGCTCGTCTAAAACTCCTGACCTCAGGTGATCCACCCGCCTCGGCCTGCCA
AAGTGCTGGGATTACAGGCATGAGCTACCGCGCCCA----GCCTGTGCTTATTTTCTTAAAATAATTTTTGTATTAAAAA
CTTCACATTAAATAAGTCCTAATGTTTTATTGCATAGTAGGGTGACTAGAGTTAACAATAACATTTTGCATATATTTTGA
AGTAGCTAGAAGAGAGGATTTTGAA------------------------AGTTCTCAACACGAAGAAATGACACATATTT
GAGGTGATGGATATGCTAATTACCC---TGGTTTGATTATTACACAATGTATACATGTGTCAAAACATCACACTATACCA
CATAAATATGTACATTTATTATTTGTCAATTAAAAGCAAAATAAAACAAAAAACCTTCATCTAATACTTTGGATCATTGT
GAAAAAATAAATTCCTGAAGTATAAAGCATCT
>Papio_anubis_TRIM5
GCACTTCCTCT-AGGAAAATTCCTTTGCGCAGATCAGGGCCCTTG-ATTGGTGAGTGAATCCTAACCATGTCTT----TC
CAGGCCTGCCTTCACTCTTCTCCCCAGACTCACTACTTCTGCACTGGTGTCTGAAGGTGTATTGAGTGACTTTGTGGAGG
GCAGAAGTAGGAAGTCTTTGGGACAAAACTGAATTTACCTTGTTGAGTTTAACTTACCTGAAAAGCTGTTCGGG-ATGGG
GAAAAGACACCGTTCACAGACGTCCTGCTGCCAGAGCTGACTGAGGGGAATAGAGCTGCCTGGTAGGCAGGCAGATTTGA
AAGAAGGGAGAGCTTT----------------------------------------------------------------
--------------------------------------------------------------------------------
--------------------------------------------------------------------------------
--------------------------------------------------------------------------------
----------------------------------AAAGTGAAGCGCTTTGTTTCCTGGAAGGCTGGTTATTTTTCCACAC
TGACTCTCTCGCCATCCCCTCTCTATTCTATAATTTTTTATTGAACTTTGCTGTAGAGAGCCAGAATTCTCT--TTCAGT
GCCTTCTCCCAACAA---GGGCAAAGACAGGGGCCTTGGAACCCTAATGATTTAATGCCTATCAGTGTGCTAATGTAGTG
TTTCTGCATACCTCTACAGGTCAGCTCTCATCACCTGGGCCCGTCTCTGTGGCATCA-CCTTGGTGGTGTGACAGCTGTC
CAGCTCTGTAGCCCTGTCATTGTCACTGGTAAACAGAGTTATTTCCCTAGTTCATATTGGTTACAAAGATAATGGCAAAA
AAAGGCAAGCAGGTTTTATTTCTTGCTGGGAGTGGAGAATAAGAGAACTCCTTCTCTAAAGCCCCCTCCCCCGAAACAGT
GGGAATCA-TGGGCTTTAAAAGAACTCTGCATGGGAAGAGAAAGGAGTGTTAGCCTGCAGGGTGGAGCTCCAGTTGTGCC
ACCTCTGTTTATAAACACATGTCTTCATAC--------------------------------------------------
--------------------------------------------------------------------------------
--------------------------------------------------------------------------------
--------------------------------------------------------------------------------
--------------------------------------------------------------------------------
--------------------------------------------------------------------------------
--------------------------------------------------------------------------------
--------------------------------------------------------------------------------
--------------------------------------------------------------------------------
--------------------------------------------------------------------------------
--------------------------------------------------------------------------------
--------------------------------------------------------------------------------
--------------------------------------------------------------------------------
--------------------------------------------------------------------------------
--------------------------------------------------------------------------------
--------------------------------------------------------------------------------
--------------------------------------------------------------------------------
--------------------------------------------------------------------------------
-------------------AACACATGC-CACAAAGTGGTG---ATTTTCTTGTTTGCTGTCG-----GGGTGGGG----
--TAACACTCTAGTGATATGTTAATGATCTAAAGGCAATGAGGGATTGTCTGTTCCAGTTT--ACGCAGGTTTGGGGGTC
TAATTTCCCCCTTGGATCTGGTC-GGGGTGAAGATCTGGACCATGCTGGGCAGTCTGGCTTCTT--CAAGCAGCTTTGTC
TGTAAATAAAAGGAATAAAGAAAACCATTAAGAAAAATAACTTTCCCAGTTATTTCATCAGGGCTTCCCTGGTGACAGCA
TCTGTTTACCCTTACTAGG-CACCAAGTCCAGACTCAGGGAACAACTGGATTTCCTTAAAAATCATTAACCTTGCTCCTC
CCTCTCCTTGGGCCGTATGTGCCCTGCAAAAGCAGAGCTTAG--GTGAGATACAAAGAGCAGCAGAAGCATGTG-AAGGA
ATACCCAGCGATGGCACCGTTTCTAACTTTTAATAAACAAAATGAGTACTTGTGTAAACCAAAAATAAAATTCTGTGGCC
CCTAGCCACCTGAATGGACTTTCTC---AGCCAGGCTGCTCTTAAAATGTAACCTGAAAGACTGATTCAGGCCATGACAG
GAAACGGAAGTGGGACCTGACTCATTATTCCTCTCCAGCATGAACTTCAACATAGACCCTAAGTCTGGTAAGAAACATTT
CAGTCTATTCTCTCTGAAGCCTGATACCCTAAGGCTGCATCTGCACAGTAAGAACTTTGGTCTCCACAGTTGCTTATCTG
AACTCAGACATTTCCTTTCTATTGATCCCAGGTCTTTAGATAAAGACAGTTGTCAACCAGAGTCTTTCTTAAATGTATTT
GATTGAAGTATCTTGTCTCCTTAAAATATATGAAACCAAGCTACACCCCAACCAGCTTGGACACATGTTCTTAGGATCTC
CTGAGGGCTGTGTCATGGGGCATCGTCACTCATATTTGGCACAGAATAAATCTCTTCAAAATATTTTACAGAGTTTGACC
CTTTTCATCGACACTTGGTTGATGTTAATGATATCAGATGTCAGAAGTGGTGTGATAACAGGATCCTGAGACACATGAGA
GAGGGAGTCTCTCTCATGGGGACCCTCTGTATTCAACTCCAAATGCCCTTCCCATGAAAGATATAGCTGC---ACTTAAG
CTAATTCAAGCTTATATGGAAGACTCCAGGCAAAACTGTTTCCTCATCCCAACTTCCCTTCGTCTGAGCAAATCTTACTG
CCTTAAGGTTGATTTT-GGAGAGCTCACCTCTGCTTCATGTTTCTTGTCCCTGCTTCTGGTGATAAATCAGTGTTTGGCA
CCCATCTTCTGAACTCATACAGAATACCTTTCTGGTGGCATTGTAAACCAAAGAAACTAATGGAAGGGGGCCTCACTCAA
TTTGGATGTTTATTTTGCCAGGGTTGAGGACATGCCTAGGAAAAAGGAGCATAAAATCACAGGAACATC---TGTGATTC
ATGCTTTTTCCAAAGGGGGTTTGAGGACTTCAGTATTTAAAGGGGAAAGAGAAAAGAAAAAAATGGAGGAGAGTCGATAA
AAGAAGCAAAAGGTTACATTCTTTTGAGGCTTTAGCTAGCGTTAGCTGAAGCCATAATTTACATGTTAAAGGAGGGCTTG
GAGGAGTAATCAATTATGCACTGTCTCCCACTCAGTGAATCTGCATTTTTACAAAAGATAAACAGGGAGTAGCAGAAACA
GTCAAACATGCATTTGTCTCAGGTGAGCTGAGGGATGATTTATCCTCTGTCTTTGTCCCATACTAGTGAAGATAAGCTTG
CTAATTGACATTGTCAGGGTGAAATTCAACAGATCTCCGTTTCAGAGTAAAGACCTTGGGGCCCACAAGAAATTTCCTTG
TGAGCAAATTGTGAGGGAAGCCACCTGGGAGGTATGTGG--------CTTTGCAGCTATGATATCTTTGCAGCTATCTAG
GAACAAAATATTATAGAAGG----------TGGCCCAATTCCCAAGCTTTAGTATTCCCTTTGGCATAGTGAGTTTGGGG
CCCCAGATTGTTATTTTCCTTTCACACCATATATTTCAAGATTTT-AGAATTGATTCGATAATCTTCGGCTTCTATTTTT
TT-ATTTTGCTGGTATGGTGGGGAGTATACCATTAAATGGTTGTGATACTGTGAAATACGTTTGGTCTTCATCACT-AAA
CCTAGCATACATCTCCTACAATTCTTGAATCTGCAAAGTGGTAAGTGTCTTTTTGTATGATAATTAATCAATTAATGGCT
GGCAGCCCCTCGGTAGCTTCAGGA-GTGGGGGTCCTCGCCAGAAAGACTAAGGCAGAAAATGAGGGTTGGGACTTTCAGC
TCAACCCACCAACCTCTGGGGAGAAGTGAGGGGCTAAAGGTTAAGTTGTACTGATAGCCAGTGATTTAATCTATTATACC
AATGTAATGATGCCTCCATGAAAACCTAAAAGGACAGGGTTCAATAAGGTTCCAAATAGCTGAACACTTGGAGGTTTCTG
GAGCGTAGTGTGCCTGCTGAGGGCAGGGAAGCTCCATGCCCCTTCTCTCATGTGTCAGCCTATGCCTCTATCTGTATACT
TTGTGATGTCCTTCATAATAAACCAGTACATATAAAGGGGAGAACCCTGACTTACAGCCAGTCAGGCAGAAGCACAGGTA
AAACAAGCTGAGTCTTGGAGTTGGCATCAGAAGTTGGGGAG-CAGTCTGTGGGCCCAAGCCTTCAGCCTGTGGAATCTGA
TGCTGTCTCCAGGTATAGTGTCAGAATTGAATTAGAAGACACCCCATTGGAGTTTGCTGCTGAAAGAAGGCCTCCTTCTA
GTTTTGGG-AAAAACTCTCGCAAATTTGATCACAGAAGTCTTCTGTGTTGATTGTTTACTGAGAGTATAGGCTATGCTGA
GTTTCTTTGTTTCCTACACAGTACTATGGATACA----------------------------------------------
--------------------------------------------------------------------------------
--------------------------------------------------------------------------------
--------------------------------------------------------------------------------
--------------------------------------------------------------------------------
--------------------------------------------------------------------------------
--------------------------------------------------------------------------------
--------------------------------------------------------------------------------
--------------------------------------------------------------------------------
--------------------------------------------------------------------------------
--------------------------------------------------------------------------------
--------------------------------------------------------------------------------
--------------------------------------------------------------------------------
--------------------------------------------------------------------------------
--------------------------------------------------------------------------------
--------------------------------------------------------------------------------
--------------------------------------------------------------------------------
--------------------------------------------------------------------------------
--------------------------------------------------------------------------------
--------------------------------------------------------------------------------
--------------------------------------------------------------------------------
--------------------------------------------------------------------------------
--------------------------------------------------------------------------------
--------------------------------------------------------------------------------
--------------------------------------------------------------------------------
--------------------------------------------------------------------------------
--------------------------------------------------------------------------------
--------------------------------------------------------------------------------
--------------------------------------------------------------------------------
--------------------------------------------------------------------------------
--------------------------------------------------------------------------------
--------------------------------------------------------------------------------
--------------------------------------------------------------------------------
--------------------------------------------------------------------------------
--------------------------------------------------------------------------------
--------------------------------------------------------------------------------
--------------------------------------------------------------------------------
--------------------------------------------------------------------------------
--------------------------------------------------------------------------------
--------------------------------------------------------------------------------
--------------------------------------------------------------------------------
--------------------------------------------------------------------------------
--------------------------------------------------------------------------------
--------------------------------------------------------------------------------
--------------------------------------------------------------------------------
--------------------------------------------------------------------------------
--------------------------------------------------------------------------------
--------------------------------------------------------------------------------
--------------------------------------------------------------------------------
--------------------------------------------------------------------------------
--------------------------------------------------------------------------------
--------------------------------------------------------------------------------
--------------------------------------------------------------------------------
--------------------------------------------------------------------------------
--------------------------------------------------------------------------------
--------------------------------------------------------------------------------
--------------------------------------------------------------------------------
--------------------------------------------------------------------------------
--------------------------------------------------------------------------------
--------------------------------------------------------------------------------
--------------------------------------------------------------------------------
--------------------------------------------------------------------------------
--------------------------------------------------------------------------------
--------------------------------------------------------------------------------
--------------------------------------------------------------------------------
--------------------------------------------------------------------------------
--------------------------------------------------------------------------------
--------------------------------------------------------------------------------
--------------------------------------------------------------------------------
--------------------------------------------------------------------------------
--------------------------------------------------------------------------------
--------------------------------------------------------------------------------
--------------------------------------------------------------------------------
--------------------------------------------------------------------------------
--------------------------------------------------------------------------------
--------------------------------------------------------------------------------
GCTCT---GACTGGAGGAACACCA-GGTTTTTGGTCTTGGCGCCGATAGGATTAATGACACGGACACACGTGGAGTGATT
TTAAGGAGCGAAAAGTTTAATAGGCAAGAAGGAAGG---------------------------------AAGGAAGAA--
-GAAAA---CAGCTCCCCCAAATAGAGACAGGGGAAGGGGGGATTTGGCAAAGAGAAAAACCTCTCGTGTGGTGGAAAAG
TGGCTGCTTATACTAGGAGGCTGGAGGAGGTGGTGTCTGATTTGCATAGAACTCAGGGGATTGGTTTGACCAGGCATGTC
ATTCGTGTGACTTGCGGAAAAAACTGGCCCTCTCAGCCTAGCCTTTCAATATGCAAATGCAGGGCACCACAATGTTTTAC
ACATGGTGGGGATACGTGGTGGCAGCTATATTGCCAGGCACATACTGGGGCAAGGAAGAAGATGGTGAGAATCACCAGGT
TTGG-ATGGACCCAGTTTCTAATGGCCAGCATTTGCATATTACAGCTTGCTGGCCCAGCTCTAAGAGCCGGGGCTTTTCT
GCTAGACAA---ATGTTTCTGGAGCTGCGTTAAAACAAACGAAAACTTCCCAAGGACCCCTTTTCCTCTCTATCTGCCTA
AAGTAATTTCTTAATAACTCCTATAACAGTATTAGATGACATTGATTAGCAAATGAATCTCAGTACAATTTCATTTTTCC
CACCTATGTATGAAAGGTGATGCCTTCCCATATAACGTCAGTAATTTGCAGCTATATTATGCTTAGAGAAACAGTTTTAC
CCTGGTCACAGGAGAAGAAAATTCTGTCTATA-TGCATATTGCTTGGATTTTACAAAAACTTGTTATTGTCTTGTAATGT
CTTTGTTGCTTGTGTTTAGCTGTCACCTCTAGGACATGTTGAATTTACATTTTCATGATCTCAGATGTCAG---AAGGTC
CATGTGTAAGGTGCAATAACCTGACATGTATGGCAGGTTGCTGACCTGACAGATACCAGGCAGATAAT---TGTGTTCCC
ATCTCAACCTCCCTGACTGCTGTGCAGCCCTTGGCTCACTGCTTAGGTAGTGGCGGGGTTAGCCCCATGTGTAAAAATTC
TGGTCCCTCTGCATATTCCTCTTACTATGTCTGTTATGGCAGCAGTTACTTTGACATGGGCTCCTTGTAATATCACATTA
AACATAAATTTCACAGCCTCATGGCAGAAGGCAGTCTCCGTT---CCTCTCTCCCGTAGGCTCTTGATGCATCTCAGTGC
TGATGCTATTTTTCATGGAATAAAAGATAAATGGAGTCCTCACTCTCATGTTTGGATCACAACTTGAGTCATAAACAAGG
CTAGACAT---CATATGATTTAAACCTCTGATCTTGCTATTTATCAGAGCCTGATACAGGCCAATGTCCCTGAAGCATAA
CAGTATATGCCGTTGGCCCATTTTCAGTATCTA-TACCACTGGATGGATTGTGCCTCCATCCCACCTTCATTCAGCCTTG
TTCTTTATGGCCTTCACAGATGATGGGAGGAGTGTACAGTTTTTGTAGGTCTGAATTTATCTCCATATAGCCTTTATAAC
ATTTCT--CTCTTTTTCAGAGCAAGGGAAAGACTCATCAGCTGTCTCATAGTGGAGATCTTTGTTTTACCATGAACCCTT
AACAGCCAGCAACACATCAGTATCCATTAAGGTCTTCTCTTACCTTGTTTTTAGCTTTACAGCTCCATTTACCTGGAACT
CCTGACAGCCCTTGATCCTAGATTGAGGCCACAGGGTCATTACTGAACCCAGGTCTGTCAGTCAACATCTCTGAGCCACC
ACTCTGTGATATTTCCCTGACTGAACAACAGCAGCAGTTTCCAATCTGATTTGCAGTTTCCCTTGTGGGAGATAATAGCC
CTACACTAGCCAGGTTCGTGTAGTTCAGCCAGGGT-ATGCAGGACAGAAGCACCATGTGGCACAGCCTCCTCAGATGAGT
TCTCAGTGAGAGTCCCTAGGGTAGTACAGGAGGTATTAT---CTCTATCATGTGAGTTTTTTAAGAAATGAAACTGGCTG
GATGTGTGTGAAACTGCTGTAGGTTAGATAAGCTTAGTACCCCAAAGGACTGATTATCTTGTGAAAGCTCATGAGAACAG
TTCTCAGGGACTTAAAAAAGGGACATACCTGGTTCTGTGGTGGAAAATGAGGTCTGTTCCTACCAACTGGAATTTAAGAT
CTATATACAGCCTTCCTAGTCCAAATCTGCTTTATATATCAGAATATAATTACTATCAATATACTATTGTACTATACTAT
TACTATATATTTCTATTACAGAATATATTGCTGTCAATAACAGCCTCATGTAGGCTAGCAAGACAGCTGACATTTCACTC
TATTGTAACCCAATAAATTTCCCAGAAGAAAACAATACCAAAAGGATAAGCTAGTATCATCTTTATAGGAGAAAAGAGCT
CAAGCCTGATATTAACCCTTTGTTCCCACATGTGTAGTCTAGTTCCCAACACTGTTCCTTTTATCTCGATTTATCTCTCA
CTCTCATTTGCTCTCCATTTCCTCCATCACCTTGTCCTGCAAGCTGTCATCAGCTCTCTCCTATATCCTAACTAATCTTC
CCCCTTGCACACTAGATCTGTCTAACCTTTTGCAACCCATGCTCAGAGTTAATGATGTCCCCACTT----CTGCTGATTG
AGACTGATAACTTTAATGGACAGTTGACACTAATAATTTTTCCTCGCTCTTTTTTTTTTCTTTTGAGACGGAGTTTTGCT
CTTGTTGCCCAGGC-------CGGAGTGCAATGGCGCGATCTTGGCTCACCGCAACCTCCACCTCCAGGGTTCAAGTGAT
TCTCCTGCCTCAGCCTCCCGAGTAGCTGGGATTATAGGCATGCACCACCAGGCCTGGCTAATTTT-GTGTTTTT-AGTAG
AGGCGTGGTTTCTCTGTGTTGGTCAGACTGGTCTTGAACTCCCGACCTCAGGTGATCTGCCCGCCTCGGCCTCCCAAAGT
GGTGGGATTACAGGTGTGAGCCACCGCGCCCAGC-------------------------------CTAA--------TTT
TTCCTCGCTCTTAAGAAAGAGTTCCCAAATGTTATGTCATTTGGGATGTGTCACATTTTCTGATCCCTGTAATACTAAAA
GTCTAACAGGTCTGTGCAGAATACGCACCATAATAGGTCTGTGCACAAGAGGAAAATGGCAACTTAAAACCCTTAGATGT
TGCATTTTCCATGAACAAGTTATTCATATATGTAATTTCTTCTA-CTAATACATTTGCCCTGCTCTCATCCTACGTTTTC
TCATAT----CACGCTTCAGTTAAACCTTTA-GTTTTCAATTAGTAATTCTTGGAT-AACCCTTGCTTCGCTTCATTATT
TGACTTCTCAAGAGCACTTACCTCTCTCTAGTAGTATTCATCACATCTGCTATTTT--GTATATATATGGCTGATCATTT
AGTTTACTATAATGTTTTAGGTGAATGCCAAGTTTACAGTAGATTAAACACCACGTTAATCTTTGTCTTGATTGTGGTCC
AGTTGCTAGCATATAATCAATCTTCAACAATAATTTGTCAAATTGTGGCAGGCCAAGTTTCACTAACGCAGGCCTCCATA
ACAACTGTTTCAGCACTAACTGAGTG-TTAAGTTACTTTTTTTTTTTTTTT-----------CTTCAGACAGAGCCTTGC
TCTGTTGCCTAGGCTGGAATGTAGTGGTATGATCTCAGCTCATTGCAACCCCCACCTTCCAGGTTGAAGCAATTCTCCTG
CCTCAGCCACCCAAGTAGCTGGGATTACAGGCACCCACCACCAAGCCCAGCTAATTTTTGTATTTTTAGTAGAGACAGAA
TTTCACCATGTTGGCCAAGCTGGTCTTGAACTCCCTGCCTCAGATGATCTGCCTGCCTCAGTCTCTCAAAGTGCTAGGAT
TACAAGCGTGAGCCACCACACCTTAATGGTTAAGTTAAATATTAAAAGCTGAGGCCAGGTGCGGCGTCTCACGCCTGTAA
TCCCAGCACTTCGGGTGGCCGAGGCAGGCGGATCACAAGGTCAGGATTTCGAGACCAGCCTGGCCAATATGGTGAAAACC
CGTTTCTACCAAAAA--TACAAAAATTAGCCGGGTGTGGTGGTGCGTGCCTGTGGTCCCAGCGGCTCGGGAGGCTGAGGC
AGAGGAGTCACTTGAACCTGGGAGGTGGATGTTGCGGTGAGCCGAGATTGAGCCGTTGCATTCCAGCCTGGGCAAAGGAG
CAAGACTCCGTCTCAAA----AAATAAATAAATAAATAAAAGCTGATAGAGCCAGTGCCCTTATACAAAGGCTGGAATAT
AACAGAAGCCCACCGAGGGTTTTGCCCAGACCTTTCCTGGGCCTTGAAGCATGACAAGATAACGAAGGAATCGATT--AG
GACCTGTTTAGGATTTAAAAAGTTGTAT-GGGGGTCTGAAGGAACTCCC-------------------------------
-------------CAAACCTTAATGATTTAGTAGGAGAGACAAGATAAGGATAATCACCCCAGCAGCTGGACCCATCTAG
ATTAAGTAAATTTACTGAGGCTCCAGAGGAAGGTCTTTAAAACTCAGACCTTAGTTACAGATTAGAAGAAGAAGTTA-AT
CACTTATGTTTTTAGATGAAT---GCACAACTATACCTAGACATATAGCTTAGAAGGTATATAAGCTCTGGAAAACTTTG
TAATTTTGAGTCGGTCTGGCAATATTTTCTAGGCCTTCTCTGTGTGTGCACTTACAGAAATAAAAACTCCCTTCTTTCCC
AGTAAATCTGCATCTTGTTATTGGGCCGCGAGAATAAGCAGCC-GACGCTTCGTTTGGTCCAGGAACAAAATCATCTCAT
CTAGTATTTTAAGACTTCTCTCTAAAGACTGATATCCATTTCCTCTGTGTTTCTAGTTTTCAAGTCTCTGACATGTGTGA
TCCACT----ATT----TATCATTACTTTCTACACTATGT----------CCATACCTTTAGGCTCCCATAAATGTCCTT
GGCAAACTTTCAGGACGAGACTCCCCAGAACCTTCCAGCTGTTGTGGATTCCTCTACTTCCACACCCCAATTGCTCTGAG
TATTAATTGAATATGTGCCATTATCTCCATTTGTCATCAATTAACCAAAAGAGTAGCAAAGAGGCCACTGAAAGAGGACC
CTGAATACGGGGTCATCTCAGGTCACCATATTGAAGATAAATAATTTTTGTAAATCACTTATTATGTCAATTTATAAATT
TGATGAAACA--GTCATTCACTC--TGCTGATAATAAGAGCAATCATTGCAAATGTACAGTGAGTGGTGAGATTTGTTAT
ACTGCATATAAGGTAGTCAGAGCAGGTATTTTTGATAATACAACATGTAAGGAGAGAATTTAATAAAATCATACTAACAT
CAGAGAAACATTTCATGCTGAGAGAAAAGCAAATGTGAAAGCCCTGAGGCATAAATGATTTGGTGATTGTAATATTGAGG
ATGTGTTTTGGCTTGGGAAAGAAAAGCCCTGAGAGATGATGGGTCACACAAAGATCTTGGTAGAAAAGACCTCAGTCTGT
TTTCTGTTCATTGAAAATAAAGAAAAATGATAACCAATGCACAGATAAGAACAGAATTTGTCATATGACACGAACTGGGA
GTAAAGTATTTAAGGTGATTACGAAAAGCCCTTGTTACCAGGTAACCAAACATGTTTTCTTATTT-CTCCCCTTTTTTTT
TT-GTCCTTAACTATTTTCATCTTGCCCATTTTCTAATTGTGTACAATCAATATCCTTTCTATTT---CTACCTTTCTTA
CTTAGTCCCATTTTAACCTTCCCAATCATGCAGGGATCTGTGAACAACACGAACCTCAGCAGCCAGGACAGGCAGGAGCA
GTGGAGAAGCTGCTATGGCTTCTGGAATCCTGCTTAATGTAAAGGAGGAGGTGACCTGTCCCATCTGCCTGGAACTCCTG
ACAGAACCCCTGAGTCTGCCCTGTGGCCACAGCTTCTGCCAAGCGTGCATCACTGCAAACCACAGGAAGTCCATGCTATA
CAAAGAAGGAGAGAGAAGCTGCCCTGTGTGCCGGATCAGTTACCAGCCTGAGAACATACAGCCTAATCGGCATGTAGCCA
ACATAGTGGAGAAGCTCAGGGAGGTCAAGTTGAGCCCAGAAGAGGGGCTGAAGGTTGATCACTGTGCACGCCATGGAGAG
AAACTCCTACTCTTCTGTCAGGAGGACAGCAAGGTCATTTGCTGGCTTTGTGAGCGGTCTCAGGAGCACCGTGGTCACCA
CACTTTCCTCATGGAGGAGGTTGCCCAGGAGTACCATGTAAGAGACTGGGATGGAAGGAAGAGAGGGCAGAAAATGGGAC
CTGATGGAAAATTTTCACTTTGCCTTTGACATTAATTGCCTTGTCATCATAGACCTGAGGCCTGGGATTATTTTTTT---
----------------CATGCTATGCTTAACTTCTGAGGCTTGAAGGACGGTTTTTT-----------GCATTTCACCCA
GTTACTGGACAATAATCCTAGAGTATATATTCCTGGCCAGGAGTAAATATTTTGTACCTTGGGTTAGATGGGTAGAGATT
TGGTGTCCAAGAAAAGCTCTGATTACCCCTTTCAGCAGGAGAGTAACTGGAGTGGGTTGAGATGTAAGTTCTTTCCTTGC
TGCAGGATCAGATTTTTCTTCTAGGACAAAAAGAATCAGTCTACTCATGGTGAGGAGATGGGGAGGTCTATTACCTGAGA
TGTAGGGAGCATATTCGCCAATGTAAGTTTTCTTCCAAGTCATGGATTCTCATTGCCATTCTCACAGTTTCTGCAAATTT
GTTTCTTCTGAGCTCAACCTGATTT----CACGTTTATACTCTCTCTACCTAGGTGCTGAGAAAGCTCATAGCTTGACTA
TGGTGTGATTCCTTTCTCACAGGTGAAGCTCCAGACAGCTCTGGAGATGCTGAGGCAGAAGCAGCAGGAAGCTGAAAAGT
TGGAAGCTGACATCAGAGAAGAGAAAGCTTCCTGGAAGGCAAGAGGATGTGGTTCCCAAAGGATTTAGCTAGAAATCTGG
GCAGGACCATGGGAAGGAGCTTTTTTCCTCTTTATTCCCTGACACTTGATAAGTCCAGATGTCATTTGATTAGTCCTCTT
CATTCTTTCCCTGATGGGGTGTGGTGGCTGGGGAGTAAATATGCCATAATGAACACAGACATCTTTAGGGAGCTGTTTAC
ATGAAGGATCTCTCTGGTAAGGATGGCTAGTGAATCCTGCATTCTATTTTTGTGCTACTTTCTGAGTCCATGACT--ACT
TTGGGAAGACATTTGGCAGTGGCTCATGACTCTGTCCTCAATGTCCAACTTTTGGCAGGGAGTTTGAGCTTGGGCTGATA
AAAGTAATATAGGCAGGCATGAGTGTCCTGGACAGCTGTGTGAAAGGCAAGCTACATCCAGGTAACCCATTTTGACTCAG
AATGAACCT---CAACATACCCATTCAAGGTCATTGTTTTAAAATGTCATGAAGGAAAAGAAA---TAGGAAAA-TCAGC
TTTCCTAAGACCTACTCTCCTGCTACTGTGTCCCC-CCTTGTGAAAACTCCCCAAAAGAAACAGTTCTTTTTCTGACTAA
CAGCCTCTGCCTGGTAGACTGAGTGCCCCTTTCTCTTCTC--ATCTCTGAAGATTCAAATAGACTACGACAAAACCAACG
TCTCGGCAGATTTTGAGCAACTGAGAGAGATCCTGGACTGGGAGGAGAGCAATGAGCTGCAGAACCTGGAGAAGGAGGAA
GAAGACATTCTGAAAAGCCTTACGAAGTCTGAAACGGAGATGGTGCAGCAGACCCAGTACATGAGAGAGCTCATCTCAGA
TCTGGAGCATCGGTTGCAGGGGTCAATGATGGAGCTACTGCAGGTAAAAAGGGGAAAGAAGCCTGAGCATTGAGATTAAA
GAAAAGTGAAGGCTATTTCCTTTTCTGTGTTGCTGTGCTCTTTCTAATACTAACAGTGTTCCCTGCAGGACCGCTTTTCT
GAAT------------------------------CAGTTGCTGAAGTTATAGGAATAATTGAATGTAGAAGTAACAAGAG
ATAATCCCATTTTTATTAATTTATCCCAGAGCAGTACACAAATTTGACATAGTAGAGATGATCAATTAGCTCTAGTTATG
TTTGATGGGTTCCTATTCTCTGTAATCCAGTGTTGAGCCCTTATCAGTGCAG-TTTTCATTGCTTAGCTTAGCCACTGGC
AAACAAATACACGTCAAAATACAAGATGC--TTTTTATTGTTTCCCTTCATGAAATTAATTGAGA-CTTTTTCCTCTTT-
----ATTTT-CCGAAAAAAAA-TAAATAACTGCTATCACTTCTTCTTTATATGCTGAATAGAATTCACTAGTAAA--GGT
CGGGCACGGT----------------------------------------------------------------------
----GGATCACGACGTCAGGAGATCGAGACCATCCTGGCTAACACGGTGAAACCCCGTCTCTACTAAAAA----------
--------------------------------------------------------------------------------
--------------------------------------------------------------------------------
--------------------------------------------------------------------------------
--------------------------------------------------------------------------------
--------------------------------------------------------------------------------
--------------------------------------------------------------------------------
--------------------------------------------------------------------------------
--------------------------------------------------------------------------------
--------------------------------------------------------------------------------
--------------------------------------------------------------------------------
--------------------------------------------------------------------------------
--------------------------------------------------------------------------------
--------------------------------------------------------------------------------
--------------------------------------------------------------------------------
--------------------------------------------------------------------------------
--------------------------------------------------------------------------------
--------------------------------------------------------------------------------
--------------------------------------------------------------------------------
--------------------------------------------------------------------------------
--------------------------------------------------------------------------------
--------------------------------------------------------------------------------
--------------------------------------------------------------------------------
--------------------------------------------------------------------------------
--------------------------------------------------------------------------------
--------------------------------------------------------------------------------
--------------------------------------------------------------------------------
--------------------------------------------------------------------------------
--------------------------------------------------------------------------------
--------------------------------------------------------------------------------
--------------------------------------------TACAAAAAATTAGCCAGGTGTGGTGGCAAGTGCCTG
TAGTCCCAGCTACTTGGGAGGCTGAGGCAGGAGAATGGCGTGAAGCCGGGAGACGGAGTTTGCAGTGAGCCAAGATGGCG
CCACTGCACTCCAGCCTGGGTGACAGTGCAAGACTCCATCTCAAAAAAAAAAAAAACAACGAAAACTGCTCTCATCCCCA
TTTTCATGATGTTAACTATAATTGTTAACTATAATTGCCATATTGTGCAATAGAGCTCTTAAAGATAGTCTTCTTTTCAT
TCTGAAGTTGGTATCCTTTTACCGACATCGGCCTGAACTCTCCCTACACCCCAGCTCCTGGAAACCCATCTTCCACTCTC
TACTTTTAT-----------------------------------------------------------------------
--------------------------------------------------------------------------------
--------------------------------------------------------------------------------
--------------------------------------------------------------------------------
---------------GAGCTCAACTATTTTTTACATCTACATACTAAGTGATATTATACAGTATTTGTCTTTCTGTTCCT
GACTTATTTTACTTAAACTCCTCCATGGTGTGAGATAGTCTTCTGCATATGGCTATCCAGTTGTTCCAATACAGTGTATT
GAAGAGA-------CTGTCCTTCCCTCAATGAATGCTGTTACCACTGTCAAAAACTAACTGATCATAAAGGTATGAATTT
TTTTCTGGGTTACTATACTGTTCCATTGGTCTATGTGTCTGTTTCTAATGCTAGCACTATACTGTTTAGATTACTATAGC
TTCATAATATATTTTGAAGTCAGGTA---TGATGCTTCCAGCATTATTCTTTTTGTTCAGGATTTCTTTGGTGATTTAGG
GTCTTTTCTGGTCTCATACAAACTTGAGGGTTTTTTTTTTTTTTTTTTTGTATCTATTTTTGTAAGAAATGTCAGAATTT
CAGTAAGGATTGCATGGAATCTGTAGATTACTTTGGGTAACATGTACATTTAAGGATATTACAACTAGACTACCACCATA
TTACAACTCATCATTACAGCAGCCTTAGAGCAGGCTTATAAGAGGTCCTAAAGGGAGTGCTAAACATGGAATAGAAAGAA
CAAC---TGATACAGAAAAAAAA---ACACACACACTAACGCACATACCCTACAGACAATATAAAACAAGTACACAATCA
AGTCTACCTAACAGCCAACGAACAGCATAATGTCACATATCAATACTAACGCAGAATGTAAATGAACTCAATCCCCTACT
TAAAAGACATAAAGTGGCAAAAGGAATAAAAAGATAAGACTCAACCCAGTCTGCTGTCTTCAAGAGACCCATCTCACATG
TAATGACACCC----ACAGGCTCAAAGCAAGGGAGTGGAGAAAGACCTAATGGAAATGGAAAACAAAACGGAGCAGGAGT
AGCTATTCTTATATCAGATAAAACATACTTTTTAAAC-AATGACAACTAAGGACAAAAAAGAGCAAACATGATAAAGGGT
ATCATTCAACAGGAAGACTTAACCATCTTAAATATATATGCACCATAGGTGGGAACACTCAGATTCACAAAACAAGCTTT
TCTTCACCTGAGAAAAGACTTAGACGACCTCACAATAATACTGGGAGACATCAACATTTCACTGAAAGCATTAGACAGAT
CATCAAGGCAGAAAACTAACAAAGAAACTCTGGACTTAAACATGACCCCTGACCAACTGGATCTAATACACATCTACAGA
ATACTTCATGAAACAACCACAGAAAATACATTTTTCTCATCTGGACCAGAACATATTCTATCATCAGTCACATGTTGGGT
CATAAAGCAAGTCTCAATATATT----AAACAAACAAACAAACAAACAAACACTGGCCAGGCACGGCGGCTCACGCCTGT
AATCCCAGCACTTTGGGAGGCCGAGGCGGGCGGATCACGAGGTCAAGAGATCGAGACCATTCTGGCCAACATGGTGAAAC
CCCGTCTCTACTAAAAATACAAAAA-TTAGCCAGGCATGGTAGCGGGCGCCTGTAGTCCCAGCTACTCAGGAGGCTGAGG
CAGGAGAATGGCGTGAACCCGGGAGGCGGAGGTTGCAGTGAGCCAAGATTGCGCCACTGCACTCCAGCCTGGGCGACA-G
AGCGAGACTCCGTCTCAAAAAAAAAAAAAAAAAAAAAAAAA---------------------------------------
-------------------GAAATCAATATCAAGAAGACCTCTCAAAACTACACAAATACATGCAAATTAAACAACTTGC
TCCTTAACAACTCCTGAGTGAATACTGACATTAAGGCAGGAATCAAAAAA-TTATTTGAAAACTATAAAAATAAGAACAA
AACTTACAAAAATCTCTGGCATGCAGCTAAAACAATTAAGAGGAAACTTTATAGCACAAAGCACCTTCATTAAAGAGTTA
GAAAGATTTCAAATTAACAATCTAACTTTCCATCTAGAAGAATGAGAAAGAAAAGAATGAACCATTCCTCCAAGGTAGCG
GAAGAAAATAAATAAGTAAAACTGGAGAAGAACTGAATAAAACTGAGGCACAAAAACCCATGCAAAAGATTACTGAAGCT
AACAGTTTGTTCTTCAAAAGAATAAACAAAACTGGGTTTTCAAATTTGTTGTTTCCTTATGTTTATGTCTATACGTTTGC
AGAAGGACATAATTTAGTTTCTGTGCACTGGCTTTGTTTGTTTTCCAAGATTCTAGGCATACTGTCTGCTATGGTTCAAG
GGCAAGCTTGCTGCTTCAGCGTTCAGGCAGGGTGGCCCAGAGTCAGGAGGTGGCCAGGCCTGGCAGCTGACTCTACGGAG
TTGGACCTATAGCCTGGGTCCATGACAGTGAGCCTAGAGCCTGTATCTCTGGGGGCTATCCTGAATCCTCAATTCACAGG
TCTTGATCTGATACTGCAGCGGGCCTTGAGCTAAAGTTAGCAGAATCTGGCCAGTTCATGGGCTCTGATCTGGCACTAGG
GTCCACTGGGAGTGGACCTGGATCCTAAGTATACTGGAGCCCAGTCTAGACT--TTAGGTCCTCTGGAGCCTGGGTCAAC
AGTGACCCTCCTGGTGCTGGAGCTAGTGTTTAGTCTGGGTTTGCTAAGGCGAGTCCGGAGCCCAAGATCACAGGCACTGA
CCTGGTGCCTAGAGCCTCTGTCCCTTGGTGCTAGAATAGAAGCTGATTGTGCAGGTGCTATCCTAGAGCTTAGGTCCACA
AGTGCAGACCTGGGTCCTGAGGCCTCAGGGGCTGGCCTGGAACAAGGATACACAGTAGCAGAGCTGGAGCTGGATGCAGT
CCAGCAATGTGTTCTATTTGGACAGGCTTTACGTTCGGTGTGCTGGAGCAGGCCTGGATTCTGAGTCTGCTGGCTCGTGG
ACTCACAGGATCAAGCCTGGAGGGTAAGGCCATGGGGGACTGGCCTGGCACTGAACAGGCCTGGAGCCTGTGTTCTCAAA
TACCTACCTGGTGTTTGTGGCCAAGGGTGCTGAGCTGGCACTGTAGTGGGACTGAAGCCTGGAGCCATAGGGGATGCTGT
GGTGTTGGGTGGGCCTGTGTCATATGTCTGCAGGAGCTAAGCTGAAGGATGTGTCTGCAGGTACCCATGATGACTAATAC
TGTGGAAGTCAGTGTGATGCTGTGGCAGACTTAAAGCCTGGGGCCATGGAGACCAGTTGGATACTGGAGGCAGTTTGGAG
CCTGGGGCCACTGGGGAAAGCCTGAACCTAGGCCATGCTAGAAGGCTGATTCTGTGGGGGCTGACCTGGCACCAGGGCCA
GTATGCACCCTGGGGTAAACCTGGCTCTGGGGCAGGATTATAGACCGAGTCCATTGGGCAGGACTTGAGCCTGAGGCTGC
GGGATACTGTGTGGCATAGGGTTGGGCTTGGAGATTTGGTCCGTGGGTACTGGCCTATAGCCTGTATATGCAGGGACTGA
ACTGAAGGCTAGGTTCAGAATTGTCAGCCTGATAACTAGGGATACAGGGCTAGATCTGGTGCTGGTATGGGCCAGAAGCC
TGTGGCCATCAGGGCCTGAGGTCAGCCTGGCTGTGGGGCCAATCTGGAGCCTGAGGCTATTGGACTGTCCTAAAACTGAG
ATTGGTCCTACCACTGAGGGCAACCTGGCATTTAGATGGCCTGTAGACTGAGTCCACTGCACAGATCTGGAGCCTAGGGC
TGTGAGATACAGCCTGGAGGCTTATCCGTAGGTACCAGTCTGGAGTCTGATGCCTTCAGACCTGCCAGACAGGGTTTTAC
TAGATTGAACCCAGTGTTAGGGCCTGAGGTAAATTTTGGTGCTGATTTTCCCCTCTTTCTCCTTGTGGGGGTTACCTCTT
ACATGCTATGCTGCCTAGAGTTGTAAGAGGGGT--------------GAAATGGAAAATGTAAAACTGTCCTTCCTACAT
TCTTCCATGAGTGTTTTTCTTATTTCTGTGCTATACCCAGATGCTGTAAGCTCCTACTCTATTTCTTAGTTCTGGTGAGG
TGTTTTAGTTCTTGGATGGTGGTTTAAATTGTTTTTGCGAGGAGACAACTGCTAGAGACTCCTATGATACTATTTTGCTG
ACACCCATCTGCAATTCCTTTCATTTCTATCTATAGCACACACACTTATGTCTCCTCTTTTATTCCTGATTTTGGTGATT
TTGTTTTCTCTCCCTTTTTTTGTCCTTTCAGTTATAATTGGGTTAATTTTATTAACTTTTACGAGGTTAAAAAGGCTTTT
TGCTACATTGATTTTTATCTTTTTTT-AAGCTTTCTATATCGTTTCTGCTCTGATCTTTATTATTTCATCTTTTTCATTG
AGTTTTTTGTTGTTGTTCCTTTCCTAATATC-CTAAGGTGAAATCTTAGATACTGTGAAATCTTTTTTTTT-CTGATATA
GTGTTTATTCAGTGAATTGCTTTAACTGTATCTCATACATTTTAATTTTTGAGTTTTCATTCAGCTCAATGTATTTTCTA
ATTTTCTTTGTGATTTTTTGGTTTTCTCTTGGGTTATTCAGAAAAGTAGTGTTTAATTTTAAAGCATTTAAGAATTTTTT
AAATGTTTCTTCTGCTGTGGATTTCAAATCCCATTCCTTGGTAATCAGATAACTTGT---ATCATTTGTTAATGTATTAA
AACTTA----ATGGTATGGAACATTACATGAGCAGGAAAATGTTTTATATGCATTTGAAAAGAATATGTATTTTGCACTC
ATTTGGTGAAATAATCTAAAGATGTCCATTAAGTCAAGCTAACTGATAGTGTT-GTCTTCTATATCCTTTATGGTTTTTA
TACTAGCTTTTTAATTAATTACTGAAAGTAAATTATTGAAATCTTCACCAGTTGTTACTGAGTTGTCTGTTTTCCATTTT
TTAATTCTTTATATATTGTTTTTAGTATTTTGAAGCTCTGTTGTTAAGTGAAGATACACTAATATTGTTATTTCCTCTTG
ACATATTGAAACTTTCTTTCATTATGAAATATTCCTGTTATTCTCACTTAGCAGTTCTTGCCTTAAAGTATCTTTGGTCT
AATATTAATATATCTACTTGAGTTGTCTTATGGTTAAAGCTTTCATAGTATATATATTTT-ATTTCTACTTTGGGTTTAT
TTATGCCTTTGAATCTAATATGTGCTCTTCTATAGGTAGTGATAACTGAATCTTCTTCTTTGCCCAGTCTGTCTGACAGT
CTCTGACTTTCCATTTGGGTTTTCATTATAACATTTAATGCAATTATTGATACAGTTTTACTTAAATTTACTATTTTGCT
ATTTGTTTTCTGTATTTCTGCTGTCTTTTTTGATGTTGTTATCTTCTGCATCCTTAACTGGCTTCGTTTGTGTTAAATAA
ATATTCTCCAATGTATATTTTTAGTTTTTCTCTTTTTCAGCTGTATGACATTAGTATTCTTCCTAGTGGTTGCTTTAATG
ATTACAATATGCATCTTGTCCTATCACAGCCAGCTTCTGATTAATGGTAACTTAATTCCGGTAAAATACAGAAACTTTCC
TTCAGTATTGCTTCATTTTCTTCATCTTTGGTTATCATTTTGTCATATATCTCACATGCATATATGTTATAACCTATTAA
TATAGTATTGAGTTACTTTGTAATAAACTTAATGTCTTTTGAAGTTATTAAGAAAATACTTTGGGAAATAAACTATAGAT
TCTTTTATCTTAACTCACATTTTATAGTATTACCATTTTGTTTAGGTT------------GAGTAAATCTTTGGAGGAAA
TTAATTTCAACTGAAGAAAATTTAAAAAATATTTTTGGGAAGAAATATTTATGGGAAGAAATATTTTGCAGGAGCTCACA
CCTGTAATCCCAGCAATTTGGGAGGCTGGGGCAGGTGGATCACCTGAGGTCAGGAGTTCAAGATCAGCTGGCCAACATGC
AGAAACTCCATCTCTACTAAAAATGCAAAAGTTAGCTGGGCATAGTGGCACGTGCCTGTAATCCCACCTACTTGAGAAAC
TGAGGCAGGAGAATCACTTGAACCTGGGAGGCAGAGGTTACAGTGAGTTGAGATGGTGCCACTGCACTCCAGCCTG---A
ACAGAGCCAGACTCCGTCTCAAAAAAAAAGAAGAAAAAAA--GGGAAAAAACATTTTTTCTTCCATCTTCCAGCAACAAA
TTCTCTTAGTCTTCATCTGAGAATATTTTTT-CTTCATATTTGAAGAAAATTTTTGCTTTATATGGAGTTTGGAGTTGAC
AGCTTCTTTTAGTGCTTTCAATAAGTCAATCTAGTCTTTTCTGTCATCTATTATTATTTAGATGAGAAGTCAGCTATTAA
CCATATTGAAAGCATTCCTTATATAATGATTAATTTTTCTCTTGCTCCTTTAATTTTTT-CTTTGCTTTGATTGTAGCCT
TTGGAAATTTTTCTATTATATATGGATCTC--ATTAGTTATTTAACTTGGGGTTCATTGAACACAGATGAATATATTAAC
ATAGATGAAATATTAATTTTTATAGAATTTAAACTATTTTTCCCCAATTATTCTTTTCTACTTGAAAATGTAGCAACATA
CATGTAATAGGTCTTAAAACAGGTTTTAGAAATCTTTTCCTCTCTTCTTTCCTTCTGGAAGACCTATTACATGTACATTG
CTACATTGCTACATTGTGACATCTGACATGTCTTTGAGGCTATTTTTATTTTTTAAGTCTTTTTTCTCTCTGTTCTTTAA
ATGAGAAAATTTTTATTGATGCAGCTTTTCAGGTTCAATGATCTTTTTGTGTGCTGTGGAGCACTTTTAGCAAATATTTC
ATTATTGTTATTTTACTTAAAATTTTCAGAATTTTTATTTCCTTATCATTTCTCTCTCTCTCAAGCGTATCTATTTTTTT
GAGTCATTGTTTTT-ATACTTCAATCCTTTAAGCATAGTTCTCCTTAGTTTTTTAACCTATTTGCAATAGTTGCTTTGAA
GTCTTTTATCTTCTAGTTCCAACATCTGGGGTCACTTGAGGATATTTTCAATTTATTGTTTTG-GGG-TTTTT--GTGTG
TGTGTGTGTGTGTGTGTGTGT-GTTTT------AAATCCCCC-GAGCTGTGGTATTCTATCTTGTTC----------CTT
TGTATTTGTATACATTTCTTTTGTAAATATAAAAATATATATATATATATA----TTTTAGACAGAGTCTCACTCTGTCG
CCCATGCTAGTATGTAGTAGTGCGATCTTGACTCACTATAGCCTTGACCTCCTGAACTCAAGCAATCCCCTCACCTCAGT
CCCCAGAGTAGCTGCGACCACAGCTCCACACTACCATGCTCACCTAATTTTTGTATTTTTTGTAGAGACGGGATTTCACC
ATGTTGCCCAGGTTGGTTTCAATCCACTTGCCTCAGCCTCCCAAAGTCCTGGGATTACAGGAATAAGCCACTGCAGCTGG
TCAAAATGTACATATTTGTTACTTTGTAGTTTCTGAGATTTCCCATCCTCTAGTCTCTACCCAGCAAGAAGTGTTTCTGT
ATCTTCATTTAGTTACTTCCTTATGGTTGCTACTGTCTCTGCTGTGTTTAAAGAAAACTCAAATATAATTTTTAAGTTTG
GCATCCTAG-----------------------------------------CTCGAATAGAAGTTATGTTCAATCCCCTCA
AGGCAGTAAGGCTTCTGTCCTCTCCTGATGAATCTGTGCTTGGGTTAGTGAGATTGTCCAAATTAATTCAAAGTTAAGGC
TGTTTTGAAATCTGCTACAATTTACTCACTGATATGTTGTTTCACTTATCCTTT-CCATATGTGTGTGTCTTTAGCATGG
CCAGGGTTGCATATAACTTACTTCTAGTTAAGTTAATATATGTAATTCCTGTTGTTTCCAGCCACAATGCAGTAGTGCTT
TTAAGATGGGCATCTGGGCTGGGCGCAGTGGCTCGTGCCTGTAATCTTAGCACTTTGGGAGGCGGAGTCGGGCGGATCAC
---GTCAGGAGATCGAGATCATCCTGGCTAACACGGTGAAACTTTGTCTCTACTTAAAAAAAAAAAAAAAA---------
-TTAGCTGGGCGTGGTGGCGGGAGCCTGTAGTCCCAGCTACTGGGGAGGCTGAGACAGGAGAATGGCGTGAACCTAGGAG
GCAGAGTTTGCAGTGAGCCGAGATCGCGCCACTACACTCCAGCCTGGGCGACAGAGTGAGACTCCGTCTCAAAAAAAAAA
GAAAAAAAAAAAAAAAA---GATGGGCACCTAATCCAACACAGACAAATGCCACGCAAGCC-TAAAAGTTTTTTATGTTA
AAACTTAGAAG-----TTCTCCTTTCTGCTGGGGTTTGTATCAGGAGAGTTACATTTCCTTCATGTACAGAGATTAAACT
CAATGTAGAGGAATAAGTAGAATTTGGAGAAGGACATTGATCACATTTTTGTTTTTTGTTTTCAGATGGAGTCTCACTCT
GTCGCCCAGGCTGGAGTGCAGTGGCATGATCTTGGATAACTGCAACCTCCGCCTCCTGGGTTCAAACAATTCTTGTGCTG
CAGCCTCCCGAGTAGCTGAGATTATATAGGCATGCATATTTTTTGAAGAGACAGGA------------------------
--------------------------------------------------------------------------------
--------------------------------------------------------------------------------
--------------------------------------------------------------------------------
--------------------------------------------------------------------------------
--------------------------------------------------------------------------------
--------------------------------------------------------------------------------
--------------------------------------------------------------------------------
--------------------------------------------------------------------------------
--------------------------------------------------------------------------------
------------TTTCACCAGATTGGCCAGGCTGGTCTCGATCTCCTGACCTCAACTAATCTGCTCGCCTTAGCCTCCCA
AATTTCTGGGATCACAGGTGGGAGTCACTGTGCTCAGCCCATAGACCAGATCTTGATG--ACAAGGTTTGAGTTTCAAAA
TTCAGCTATGACTGAAGTTGTAATTGCCCTTTCCAAAATCCTTTTCACCA-----------------------------T
TTAATCCAGTTTTATTTGGTTTATGTTACATACAACATAAAAGTACCAATACAAAAAAGCAAAACTATTTGATTGTATGT
GTAGATCCAGCTATTGGCGTTGTTCTTG-AAAAAAAATCTATGTGGAAAAGTTATGTCTGGCATAAAGGAGACCAAAGAC
ATTTCATTCGTCCATATCTGCTAAAACAAAA----CAATATTTGTG---ATAAAGAGCAGTAGATGA-------------
--------------------CCTAAAACCATTAAGAATGTAGACTAGCCAGGTGCAGTGGCTCACGCCTGTAATCCCAGC
ACTTTGGGAGGCTGAGGCAGGCGGATTGCCTGAGGTTGGGAGTTCAGCACCAGCCCGACCAACATGGAGAAACCCCGTCT
CTACTAAAAAGACAAAAA--TTAGCCGGGCCTGGTGGCGCACACCTGTAATCCCAGCTACTCAGGAGGCTGAGGCAGGAG
AATCGCTTGAACCGAGGAGGTAGAGGTTGCGGTGAGCTGAAATTGCACCATTGCACTCCAGCCTGGGAAACAAGAGTGAA
ACCCTGTCTCAAAAAAAAAAAAAAAAGAAAGAAAGAAAAGAAAAGAAAAAATAGAACGTACGCCAAACTGACCTGGTAGA
GACTA--GAGTTCAGAGTAAATGTAGTTTTTAGGACAATGACTGAGTAGGTATTAGTAATATTATGGACAACGTGGTATA
AGAGAGAAGACAGTATGGTTCGTGTTATATAATAAAAATTCTTAGTTGTTTATCCTTGTTGCTCCTTCACTACTGAATAC
ATTAAACTGCATTTAAGTGACAAACCTGGGTAAAAGTAGAGAA------A-TCAATTGCAT-TATGTGTGT--CAAACTT
AAGGAAGTAAATGAAGTCAGTTACAGTTCATGTCTAAAATGAA--GAGAGCAACCTTAAAAAGTACGTAGGCCGGGTATC
ATGGCTCATGCCTGTAATCTCAGCACTTTGGGAGGCCGAGGCAGGTGGATCACTTGAGGTCAGGAGTTCAAGACCAGCCT
GACCAACATGGTGAAACCCCGTTTCTACTAAAAACACAAAAAATAGCCAGGCATTGTGGTGGGCGCCAGTAATCACAGTT
ACTCGGGAGGCTGAGGCAGGAGAATGGCTTGAACCCAGGAGGCGGAAGTTGCAGTGAGCTGAGATCAGGCCACTGCTCTC
CAGTATGGGCAACAAAGTGAGACTCCTTCGGCCGGGCGCGGTGGCTCAAGCCTGTAATCCCAGCACTTTGGGAGGCCGAG
ACGGGTGGATGAC--GAGGTCAGGAGATCGAGACCATCCTGACTAACATGGTGAAACCCCGTCTCTACTAAAAAATACAA
AAAACTAGCTGGGCGA------GGTGGTGGGCGCCTGTAGTCCCAGCTACTCGGAAGGCTGAGGCAGGAGAATGGCGTAA
ACCCGGGAGGCGGAGCTTGCAGTGAGCCGAGATCCGGCCACTGCACTCCAGCCTGGGTGACAGAGCAAGACTCCGTCTCA
AAAAAAAAAAAAAAAAAAAGAAAAAGAAGAAAGAAGGAAGGAAAAAAAAGAAAAGAAAAGAGAAGAGAAGAAA-------
-----------AGATCTACACTTGTTTCGTACACTTGTTTGCTTATAACCTCAGCAAAAGCCACATAAACATCTTGAGCA
CTATTATTCATTCATCTTTGATTCTTCAAAACGTGACATAATGCCTGCAGAATAAGTGTATATATAA--GCTTTGTTGTT
TATTTTTGTG---------ATTTTGTTTT----TGTTT-AGAAATGGGGTCTTACTCTGCAACCCAGACTGGAGTGCAGT
AGTGTGATCCTAGCTCAATGCAGCCTCAATCAAACTTCTGGGCTAAAGAAATTCTCCCACCTCGGCTTCCCAAGTAGTTG
GGACTACAGGTTCATGCCACTATGCTTGGCTAATTTTTTTTT---TTATTTTTTGTAGAGATGGGGTCATGCCATGTTGC
ATAGGCTGTATATCTGTTTAAGAAATCAAAGAAGC---------------------------------------------
--------------------------------------------------------------------------------
--------------------------------------------------------------------------------
--------------------------------------------------------------------------------
--------------ACTAATTATTTAAATCATTTCATGGAGAGCCATATACGTTTGGAGAAAAAA-CCAATTGGCAGTCA
CTTCTTTCCCTTCTAAACATGTCCCATC-----TGCAGAAACCAGAAACCTCTTCCACAAGGATGAAAGCTATTTCTGCT
TTTAAGGGAACTTGAAAACCTCACATGAGTGTTCTGGGATGATTGCC--CTGAGT-------------------------
--------------------------------------------------------------------------------
--------------------------------------------------------------------------------
--------------------------------------------------------------------------------
----------------------------------------CTTATCTGTGCTTTTTT-GCCTTTCACACTGTCACCATCT
CCATTCTCAGCACATTAGGGACTGGGGGAAATATGATGAAGCTTTCTAAGTGAGGAGAGACTATTTATTTCTTAATTGAT
GTTTTCTCTCTTCTTCCCAGGGTGTGGATGGCATCATTAAAAGGTATGTGTGGGAGGACAGAGATGGT--CCTTTTGTGC
AGTGAGGAGAGATTTATAGCCATTA-------------------------------------------------------
--------------------------------------------------------------------------------
--------------------------------------------------------------------------------
--------------------------------------------------------------------------------
------------------------GAATTGTCCTGGGTTTAATTAGAATAAAACATCTCCCAGGGCAGAAAAATTTTGAT
ATTGTTGTATCAT-----------AAATTTCTGGTCACAAATCAGCATTTGAATGTTCTGTAACTA--------------
--------------------------------------------------------------------------------
--------------------------------------------------------------------------------
--------------------------------------------------------------------------------
--------------------------------------------------------------------------------
--------------TTAAGAATAGCCCAGATTTGGCCAGGTGTGGTGACTCAAGCCTATAATCCCAGCACTTTGGGACGC
TGAGGCAGGCAGATCA----------GGAGTTTGAGACCAGCCTGGCCAACATGGCAAAACCCTGTCTGTATCAAAAAAA
AAAA--TTACAAAAATTAGGGGGG-TGTGATGGCACACGTCTGTAATCCCAGCTATTTGGGAGGCTGAGGCATGAGAATT
GCTTGAATCTGGGAGGCGGAGGTTGCAGTGAGCCAAGACCGTGCCACTGCACTCCAGTCTGGGTGACAAAGTGAGAGTCT
GTCTTAGAAAAATCAA-TAAAATTAAAG--AAAA---TTAAAGAAAAAAAAAAGGAATAGACCAGATTCTATGGCAGAAA
ATTTGAGTAGTGGAGACTC--AGTGTGGGTCAGTAGTGGTTTCAGGGATAAGGTGTTGCAGTATCAGACCCCTGTGCCAT
CACTATTTTACTACCTACATCTAGTTCTGTTTCTGTATTTAATAGGTACTTGACTTATTTTGGAAGGGCCATATCTTCTT
TTTCTGCCATATACCCCTAATTGTACATTGGGACAATTCCCAC--GTTTATATTTTCTTCCTGGAAAAAGA---------
--------------------------------------------------------------------------------
--------------------------------------------------------------------------------
--------------------------------------------------------------------------------
-------------------------------------------------------CCAGTTCCTTCTTCATTTATATTTA
GATTTCCAAAATCAGATGTTTATTTGTGGAATAATATTTCAAAATAATATTCTGGATAATATGTGGTCATGGTACAAAGA
ATTGATGCATCTCAGCTGCACTCTTTAGAAGAGCATAAAAAGCTGCTATTCTTGTGTCTAAAATCGCATACCTCG-----
-------GTGGTATCAAGTTCTTTCTAACCACATGAAATTCAGGCTAGTAC--GTTTGGTGC--ACATAATATCTCATTT
GCCAAGTGTTTGTAATGTTTCCCAGAAATCTGAAACCCTAGCTGTTATCTGAGTACCTCCCTGCTGAGAATAGCTTTGAA
AGTCTTAGGCCTCTCCAAACAGGACTCCTCTCTTGATATGTCTCAAAGACACCCAGGAGCCAGGTTCGCCAGGTTCTGCA
ACCTCCCTTTCTAACCATCTCCCTGGGAACTCA-CATACATAGCGATGATGTTTCCACACATTAAATGTTAGGGTTTCTT
CTGTAAGGCACCAAAGTTTTGTTTTGTTTTAAAATCC---------------------------------TCCTTTTTTT
TTTTTTTTTTT-ATGTTATATGAGTTTAAAAATGTAGACAGG--------------------------------------
--------------------------------------------------------------------------------
--------------------------------------------------------------------------------
--------------------------------------------------------------------------------
-------------------------GAGAGGTTAATTATTTCATTTTAGAAGGAAGACACTGTG-CTTCTGAGAGGTTAA
ACTCTTCCCACGTTCTCACAGAAAGTAAGTGGGAAGGTAAACAGGAGAATATTTTGTTTGCCATCAGGGTCAAGAGTGTG
CACTCAGGCCGGGCGCGGTGGCTCAAGCCTGTAATCCCAGCACTTTGGGAGGCCGAGACGGGTGGATCACGAGGTCAGGA
GATCAAGACCATCCTGGCGAACACGGTGAAACCCCGTCTCTAGTAAAAAATACAAAAAAAAAAACTAGCCGGGCGAGATG
GCGGGCGCCTGTAGTCCCAGCTACTCGGGAGGCTGAGGCAGGAGAATGGCGTGAACCCGGGAGGTGGAGCTTGCAGTGAG
CTGAGATCCGGCCACTGCACTCCAGCCTGGGCGGCAGAGCGAGACTCCGTCTCAAAAAAAAAAAAAAAAAAAAGAGTGTG
CACTCTCCCTTCTCAGGATCCCCAAGAAGAGAGTTCA-GTGCATCAATGGGCTGAAATGATAGGGAATCAGGGGTGTTCC
AGGGACACAAGGTCAGAGGTTTGGAAG------CATTTTTTTTTTCTTTTTTAACTCTTAGGATTGAGAACATGACCTTG
AAGAAGCCAAAAACTTTTCACAAAAATCAAAGGAGAGTGTTTCGAGCTCCTGATCTGAAAGGAATGCTAGACATGTTTAG
AGGTGAGGAGAGCTGGATCAACAACAGGGTTGTGGAATTCATGTG------GTGTCAGGGTGCTAAATGGGGAAGAGG-T
GCAGTTTCCAAATACCGATAGAGGGTATAGGGGAGGATGGATATTGTCTGCTGCTGATGGGATTATATTTAATGGGAAAT
GGCTAGGTGGCTGCTTCATCCCATCATTCAGTAATTTACTGCCC---TAATATAGGGCATA------CTTTTCCAAATCT
GGAGACAAAGTGAATTTCAGTGCTGACTCCTTT-GCTTGTATTCAATATTATGCATTTTTATAATTTCAGAGCTAACAGA
TGTCCGACGCTACTGGGGTAAGGAGAAATCACATTATCATCAGCCACCCTGTGGCTTATCA--------TTATTATTATC
TTTATCTTTTA-GAATTTTATGTT--------------------------------------------------------
--------------------------------------------------------------------------------
--------------------------------------------------------------------------------
--------------------------------------------------------------------------------
--------------------------------------------------------------------------------
--------------------------------------------------------------------------------
--------------------------------------------------------------------------------
--------------------------------------------------------------------------------
--------------------------------------------------------------------------------
--------------------------------------------------------------------------------
-CTCTGTTAGGTCTCGTGTTTTAAGATTTATGATTCTCCTTCCAACACATACATAACTTACCCCTCCT------------
----------TATAACTTCTGAACAAGTTTCCTCCCAGTTTTCTCTCAAGTCTTTATCAAGATTTCTCTCATATCACA-A
ATAAAGTCACATTATATCCCCTAACTGACCTATTAATTTTTCTACAGTTGATGTGACACTGGCTCCAAACAACATTTCGC
ATGCTGTCATTGCTGAAGATAAGAGACAAGTGAGCTCTCGGAACCCACAGATAACGTATCAGGCACCAGGGACATTATTT
TCGTTTCCGTCACTCACGAATTTCAATTATTGTACTGGCGTCCTGGGCTCCCAAAGTATCACATCAGGGAAGCATTACTG
GGAGGTAGATGTGTCCAAGAAAAGTGCTTGGATCCTGGGGGTATGTGCTGGCTTCCAACCTGATGCAATGTATAATATTG
AACAAAATGAAAATTATCAACCTAAATATGGCTACTGGGTTATAGGGTTACAGGAAGGAGTTAAATATAGTGTTTTCCAG
GATGGTTCCTCACATACTCCTTTTGCTCCTTTCATTGTGCCCCTCTCTGTGATTATTTGTCCTGATCGTGTTGGAGTTTT
CGTAGACTATGAGGCTTGCACTGTCTCATTCTTCAATATCACAAACCATGGATTTCTCATCTATAAGTTTTCTCAGTGTT
CTTTTTCTAAGCCTGTATTTCCATATTTAAATCCCAGAAAATGTACAGTCCCCATGACTCTGTGCTCACCAAGCTCTTGA
ACCTTCTTACACACTCAGCCCCTTCTGTACAGCACCTCTTGTCCATGTGCATCTCATACACCTGAACTCAGTTGCATCAT
TTTAACCATCTTTTCCTTGCTGTCTCTATTCTTTCTATTTGAACGTCCTGCACTCATCAGTAAAATGTGATAATAT-CTT
GTGCCATATTCTCCCCAATATTTTATTGACATTTGATAGCAATTGTTTT-CATCATTTTCCATACTCCCAAGGAAAACTG
ACCTATACCTCATAAAATGAGACCACTATTTAGGTATTACTTCTGCGAAATATTTATCATCCAGTTGCCTCTGACACTGA
CTAAGAAGATGAAAAAAAGCTTTTCAACAGCCTTTCT-----ATATCATCGTGTGATAGTTGTTCACCAATGAATGAGTC
CTTAGTCCTGTGTCAGTTTACCCTTGATGCCCTTATTTGTGAAAGAGTTAAAGAGAAAATATCATAAATGGTATACTCT-
AAGTGTAGAGGTTTTGTATCTAGAGGATCTGAGTTCAACTCCTGT------------CTCTCCATATACTAGCAGTATAA
CTGTGAATGGCATACTTAAATGGCTGTACTTCTTTTCTTTTCTTT-CTTTTTTTTTTTTTTTT---------GAGATGGA
GTTTTGCTGTCATTCCTCAGGCTGGAGTGAAATGGTGCGATCTCGGCTCACTGCAACCTCCGCTTCCCAGATTCAAGCAA
TTCTCCTACCTCAGCCTCCCAAGTTGCTGGGATTAGAGGTGCCCACCACCACCCCCGGCTAAATTTGTATTTTTACTAGA
GACGGGGTTTCCCCATGTTGTGTTGGTTAGGCTCGTCTAGAACTCCTGACCTCAGGTGATCCACCTGCCTCGGCCTGCCA
AAGTGCTGGGATTACAGGCATGAGCTACCGCGCCCA----GCCTGTGCTTATTTTCTTAAAATAATTTTTGTATTAAAAA
CTTCACATTAAATAAGTCCTAATGTTTTATTGCATAGTAGGGTGACTAGAGTTAACAATAACATTTTGCATATATTTTGA
AGTAGCTAGAAGGGAGGATTTTGAA------------------------AGTTCTCAACACGAAGAAATGACACATATTT
GAGGTGATGGATATGCTAATTACCC---TGGTTTGATTATTACACAATGTATACATGTGTCAAAACATCACAGTATACCA
CATAAATATGTACATTTATTATTTGTCAATTAAAAGCAAAATAAAACAAAAAACCTTCATCTAATACTTTGGATCATTGT
GAAAAAATAAATTCCTGAAGTATAAAGCATCT
>Colobus_guereza_TRIM5
GCACTTCCTCT-CGGAAAATTCCTTTGTGCAGATCAGG-CCC-TGGATTGGTGAGTGAATCCTAACCATGTCTT----TC
CTGGCCTGCCTTCACTCTTCTCCCCAGACTCACCACTTCTGCACTGGTGTCTGAAGGTATATTGAGTGACTTTGTGGAGG
GCAGAAGTAGGAAGTCTTTGGGACAAAACTGAATTTACCTTGGTGAGTTTAACTTATCTGAAAAGCTATTCGGG-ATGGG
GAAAAGACA--GTTCACAGACGTCCTGCTGCCAGAGCTGACTGAGGGGAATAGAGTTGCCTGGTGGGCAGGCAGATTTGA
AAGAAGGGAGAGCTTT----------------------------------------------------------------
--------------------------------------------------------------------------------
--------------------------------------------------------------------------------
--------------------------------------------------------------------------------
----------------------------------AAAGTGAAGCACTTTGTTTCCTGGAAGGCTGGTTATTTTTCCACGC
T----CTCTCCCCATCCCCTCCTTATTCTATAATTTTTTACTGAACTTTGCTGTAGAGAGCCAGAATTCTCTCTTTCAGT
GCCTTCTCCCAACAA---CGGCAAAGACAGGGGCCCTGGAACCTTAGTGATTTAATGCCTATCAGTGTGCTAATGTAGTG
TTTCAGCATAACTCTACAGGTCAGCTCTCATCACCTGGGCCTGTCTCTGTGGCATCA-CCTTGGTGGTGTGACAGCTGTC
CAGCTCTGTAGCCTTGTCATTGTCACTGGTAAATGGAGTTATTTCCCTAGTTCATATTGGGTACAAAGATAATGGCAAAA
AAAGGCAAGCAGGTTTTATTTCTTGCTAGGAGTGGAGAATAAGAGAACTCCTTCTCTAAAGCCCCCTCCCCCGAAACAGT
GGAAAGCA-TGGGCTTTAAAAGAACTCTGCATGGGAAGAGAGAGGAGTGTTAGCCTGCAGGGTGGAGCTCCAGTTGTGCC
ACTTCTGTTTATAAACAC--GTCTTCATAC--------------------------------------------------
--------------------------------------------------------------------------------
--------------------------------------------------------------------------------
--------------------------------------------------------------------------------
--------------------------------------------------------------------------------
--------------------------------------------------------------------------------
--------------------------------------------------------------------------------
--------------------------------------------------------------------------------
--------------------------------------------------------------------------------
--------------------------------------------------------------------------------
--------------------------------------------------------------------------------
--------------------------------------------------------------------------------
--------------------------------------------------------------------------------
--------------------------------------------------------------------------------
--------------------------------------------------------------------------------
--------------------------------------------------------------------------------
--------------------------------------------------------------------------------
--------------------------------------------------------------------------------
-------------------AACCCGTGC-CACAAAGTGGTGGATATTTTCTTGTTTGCTGTCG-----GGGTGGGG----
--TAACACTCTAGTGATATGTTAATGATCTAAAGGTAATGAGGGATTGTCTGTTCCAGTTT--ACGCTGGTTTGGGGGTC
TAATTTCCCCCTTGGATCTGGTC-GGGGTGAAGATCTGGACCATGCTGAGCAGTCTGGCTTCTT--TAAGCAGCTTTGTC
TATAAATAAAGGGAATAAAGAAAAACTTTAAGAAAGATAACTTTCCCAGTTATTTCATCAGGGCTTCCCTGGTGACAGCA
TCTGTTTACCCTTACTAGGGCACCAAGTCCAGACTCAGGGAACAACTGGATTTCCTTAAAAATCATTAACCTTGCTCCTC
CCTCTCCTTGGGCCGTATGTGCCCTGCAAAAGCAGAGCTTAG--GTGAGATACAAAGAGCAGCAGAAGCAGGTG-AAAGA
ATACTCAGAGATGGCACCATTTCTACCTTTTAATAAACAAAATGAGTACTTGTGTAAACCAAAAATAAAATTCTGTGGCC
CCTAGCCACCTGAATGGACTTTCTC---AGCCAGGCTGCTCTTAAAATGTAACCTGAAAGACTGATTCAGGCCATGACAG
GAAGTGGGAGTGGGACCTAACTCGTTATTTCTCTCCAGCACGAACTTCAATATAGACCCTAAGTCTGGTAAGAAACATTT
CAGTCTATTCTCTCTGAAACCTGATACCCTAAGGCTGCATCTGCACAGTAACAACTTTGGTCTCCACAGTTGCTTATCCG
AACCCAGACACTTCCTTTCTATTGATCCCAGGTCTTTAGATAAAGACAGTTGTCAACCAGAGTCTTTCTTAAATGTATTT
GATTGAAGTATCTTGTCTCCTTAAAATATATGAAACCAAGCTACACCCCAACCAGTTTGGACACAAGTTCTTAGGATCTC
CTGAGGGCTGTGTCATGGGGCATCGTCACTCATATTTGGCACAGAATAAATCTCTTCAAAATATTTTACAG--TTTGACC
CTTTTCATCGACACTTGGTTGATGTTAATGATATCAGATGTCAGAAATGGTGTGATAACAGGATCCTGAGACACATGAGA
GAGGGAGTCTCTCTCATGGAGACCCTCTGTATTCAATTCCAAATGTCCTTCCCGTGAAAGATATAGCTGC---ACTTAAG
CTAATTCAAGCTTATATGGAAGACTCCAGGCAAAACTGTTTCCTCATCCCAACTTCCCTTCATCTGACCAAATCTTACTG
CCTTAAGGTTGATTTT-GGAGAGTTCACCTCTGCTTCATGTTTCCTTTCCCTGCTTCTGGTGATAAATCAGTGTTTGGCA
CCCATCTTCTGAACTCATACAGAATACCTTTCTCATGGTATTGTAAACCAAATAAACTAAGGGAAGGGGGCCTCAATCAA
TTTGGATGTTTATTTTGCCAGGGTTGAGGACATGCCTAGGAAAAAGGAACACAAAATCACAGGAACATC---TGCGATTC
ATGCTTTTTCCAAAGGGGGTTTGAGGATTCCAGTATTTAAAGGGGAAAGAGAAAAGAAAAAAATGGAGGAGAGTCGATAA
AAGAAGCAAAAGGTTACATTCTTTTGAGGCTTTAGCTAGCGTTAGCTGAATCCATAATTTACATGTTAAAGGAGGGCTTG
GAGGAGTAATCAATTATGCACTGTCTCCCACTCAGTGAATCTGCATTTTTACAAAAGTTAAACAGGGAGTAGCAGAAACA
GTCAAACATGCATTTGTCTCAGGTGAGCTGAGGGATGATTTATCCTCTGTCTTTGTCCCATACTAGTGAAGATAAGCTTG
CTACTTGACATTTTCAGGGTGAAATTCAACAGATGTCCATTTCAGAGTAAAGACCTTGGGGCCCACAAGAAATTTCCTTG
TGAGCAAATTGTGAGGGAAGCCACCTGGGAGGTATGTAGCCCTCTATCTTTGCAGCTAT-------------CTATTTAG
GAACAAAATATTATAGAAGGTGGTTTTGCATGGCCCAATTCCCAAGCTTTAGCGTTCCCTTTGACATAGTGAGTTTGGGG
CCCCAGATTGTTATTTTCCTTTCACACCATATATTTCAAGATTTT-AGAATTGATTCAATAATCTTTGGCTTCTATTTTT
CT-ATTTTGCTGGTATGGTGGGGAGTATACCATTAAATGGTTGTGATATTGTGAAATATGTTTGGTCTTCTTCACTGTTT
CCTAGCATACATCTCCTACAATTCTTGAATCTGCAAAGTGGTAAGTGTCTTTTTGTATGATAATTAATCAATTGATGGCT
GGCAGCCCCTCGGTAGCTTCAGGA-GTGGGGGTCCTCGCCAGAAAGACTAAGGCAGAAAATGAGGGTTGGAACTTTCAGC
TCCACCCACCAACCTCTGGGGAGAAGAGAGAGGCTAAAGGTTAAATTGTACTGATAGCCAGTGATTTAATCGATAATACC
AATGTAATGATGCCTCCATGAAAACCTAAAAGGACAGGGTTCGATGAGGTTCCAAATAGCTGAACACTTGGAGGTTTCTG
GAGGGTAGTGTGCCTGCTGAGGGCAGGGAAGCTGCATGCCCCTTCTCTCATGTGTCAGCCTATGCCTCTATCTGTATACT
TTGTGATGTCCTTCATAATAAACCAGTACATATAAAGGGGAGAACCCTGATTTATAGCCAGTCAGGCAGAAGCACAGGTA
AAACAAGCTGAGTCTTGCAGTTGGCATCAGAAGTTGAGGGG-CAGTCTGTGGGCCCAAGCCTTCAGCATGTGGAATCTGA
TGCTATCTCCAGGTATAGTGTCAGAATTGAATTAGAAGACACCTCATTGGAGTTTGCTGCTGAAAGAAGGTCTCCTTCTA
GTTTTGGG-AAAAACCCTCGCAAATTTGATCACAGAAGTCTTCTGTGTTGATTGTTTACTGAGAGTATAAGCTATGCTGA
GTTTCTGTGTTTCCTACCCAGTACTATGGATACA----------------------------------------------
--------------------------------------------------------------------------------
--------------------------------------------------------------------------------
--------------------------------------------------------------------------------
--------------------------------------------------------------------------------
--------------------------------------------------------------------------------
--------------------------------------------------------------------------------
--------------------------------------------------------------------------------
--------------------------------------------------------------------------------
--------------------------------------------------------------------------------
--------------------------------------------------------------------------------
--------------------------------------------------------------------------------
--------------------------------------------------------------------------------
--------------------------------------------------------------------------------
--------------------------------------------------------------------------------
--------------------------------------------------------------------------------
--------------------------------------------------------------------------------
--------------------------------------------------------------------------------
--------------------------------------------------------------------------------
--------------------------------------------------------------------------------
--------------------------------------------------------------------------------
--------------------------------------------------------------------------------
--------------------------------------------------------------------------------
--------------------------------------------------------------------------------
--------------------------------------------------------------------------------
--------------------------------------------------------------------------------
--------------------------------------------------------------------------------
--------------------------------------------------------------------------------
--------------------------------------------------------------------------------
--------------------------------------------------------------------------------
--------------------------------------------------------------------------------
--------------------------------------------------------------------------------
--------------------------------------------------------------------------------
--------------------------------------------------------------------------------
--------------------------------------------------------------------------------
--------------------------------------------------------------------------------
--------------------------------------------------------------------------------
--------------------------------------------------------------------------------
--------------------------------------------------------------------------------
--------------------------------------------------------------------------------
--------------------------------------------------------------------------------
--------------------------------------------------------------------------------
--------------------------------------------------------------------------------
--------------------------------------------------------------------------------
--------------------------------------------------------------------------------
--------------------------------------------------------------------------------
--------------------------------------------------------------------------------
--------------------------------------------------------------------------------
--------------------------------------------------------------------------------
--------------------------------------------------------------------------------
--------------------------------------------------------------------------------
--------------------------------------------------------------------------------
--------------------------------------------------------------------------------
--------------------------------------------------------------------------------
--------------------------------------------------------------------------------
--------------------------------------------------------------------------------
--------------------------------------------------------------------------------
--------------------------------------------------------------------------------
--------------------------------------------------------------------------------
--------------------------------------------------------------------------------
--------------------------------------------------------------------------------
--------------------------------------------------------------------------------
--------------------------------------------------------------------------------
--------------------------------------------------------------------------------
--------------------------------------------------------------------------------
--------------------------------------------------------------------------------
--------------------------------------------------------------------------------
--------------------------------------------------------------------------------
--------------------------------------------------------------------------------
--------------------------------------------------------------------------------
--------------------------------------------------------------------------------
--------------------------------------------------------------------------------
--------------------------------------------------------------------------------
--------------------------------------------------------------------------------
--------------------------------------------------------------------------------
--------------------------------------------------------------------------------
GCTCT---GACTGGAGGAACATCA-GGTTTTTGGTCTTGGTGCTGATAGGATTAATGACATGGACACATGTGGAGTGATT
TTAAGGAGCAAAAAGTTTAATAGGCAAGAAGGAAGG---------------------------------AAGGAAGAA--
-GAAAA---GAGCTCCCCCAAACAGAGACAGGGGAAGGGGGGATTTGGCAAAGAGAAAAACCTCTTGTGTGGTGGAAAAG
TGGCTGCTTCTACTAGGAGGCTGGAGGAGGTGGTGTCTGATTTGCATAGAACTCAGGGGATTGGTTTGACCAGGCATGTC
ATTCATGTGACTCG-GGAAAAAACTGGCCCTCTCACCCTGGCCTTTCAATACGCAAATGCAGGGCACCACAATGTTTTAC
ACATGGTGGGGATATGTGGTGGCAGCTATATTGCCAGGCACATACTGGGGCAAGGAAGAAGATGGTGGGAATCACCAGGT
TTGG-ATGGACCCAGTTTCTCATGGCCAGCATTTGCATATTACAACTTGCTGGCCCAGCTCTGAGAGCCGGGGCTTTTCT
GCTAGACAA---ATGTTTCTGGAGCTGCTTTAAAACAAACGAAAACTTCCCAAGGACCCCTTTTCCTCTCTATCTGCCTA
AAATAATTTCTTAATAACTCCTATAACAGTATTAGGTGACATTGCTCAGCAAATGAATCTCAGTACAATTTCATTGTTCC
CACCTATGTATGAAAGGTGATGCCTTCCCATATACCATCAGTAATTTGCAGCTATATTATGCTTAGAGAAACAGTTTTAC
CCTGGTCACAGGAGAAGAAAATTCTGTCTATA-TGCATATTGCTTGGATTTTACAAAAACTTGTTATTGTCTTGTAGTGT
CTTTGTTGCTTGTGTTTAGCTGTCACCTCTAGGACATGTTGGATTTACATTTTCATGATCTCAGATGCCAG---AAGGTC
CATGTGTAAGGTGCAATAACCTGACATGCATGGCAGGTTGCTGACCTGAGAGATACCAGGCAGATAAT---TGTGTTCCC
ATCTCAACCTCCCTGACTGCTGTGCAGCCCTTGGGTCACTGCTTAGGTAGTGGTGGGGTTAGCCCCATGTGTGAAAATTC
TGGTTCCTCTGCATATTCCTCTTACTATGTCTGTTATGGCAGCAGTTACTTTGACATGGGCTCCTTGTAATATCACATTA
AACATAAATTTCAAAGCCTCATAGCAGAAGGCAGTCTCTGTT---CCTCTCTCCTGTAGGCTCTTGATGCATCTCAGTGC
TGATGCAATTTTTTGTGGAATAAAAGATAAATGGAGTCCTCACTCTCATGTTTGGATCACAACTTGAGTCATAAACAAGG
CTCGACATTATCATATGATCTAAACCTCTGATCTT---------------CTGATACAGGCCAATGTCCCTGAAGCATAA
CAGTATATGCTGTTGGCCCATTTTCAGTATCTAATACCACTGGATGGATTGTGCCTCCATCCCACCTTCATTGGGCCTTG
TTCTTTATGGCCTTCACAGATGATGGGAGGAGTGTACAGTTTTTGTAGGTCTGAATTTATCTCCATATAGCCTTTATAAC
ATTTCT--GTCTTTTTCAGAGCAAGGGAAAGACTCATCAACTGTCTCATAGTGGAGATCTTTGTTTTGCCATGAACCCTT
GACAGCCAGCAACACATCAGTATCCATTAAGGTCTTCTCTTACCTTGTTTTTAGCTTTACAGCTCCATTTACCTGGAACT
CGTGACAGCCCTTGATCCTAGATTGAGGCCACAGGGTCATTACTGAACCCAGGTCTGTCAGTCACCATCTCTGAGCCACC
ACTCTGTGATATTTCCCTGACTGAACACCAGCAGCACTTTCCAATCTGATTTGCAGTTTCCCTTGTGGGAGATAATAGTC
CTAAACTAGCCAGGTTCATGTAGTTCAGCCAGGGT-ATGCAGGACAGAAGAACCATGTGGCACAGCCCCCTCAGATGAGT
TCTCAGTGAGAGTCCCTAGGGTAGTACAAGAGGTATTAT---CTCTATCATGTGAGTTTTTTAAGAAGTGAAACTGGCTG
GATGTGTGTGAAACTGCTGTAGGTTAGATAAGCTTAGTACCCCAAAGGACTGATTATCTTGTGAAAGTTCATGAGAACAG
TTCTCAGGGACTTAAAAAAGGGACATACCTGGTTTTGTGGTGGAAAATGAGGTCTGTTCCTACCAACTGGAATTTAAGAT
CTATATACAGCTTTCCTAGTCCAAATCTGCTTTATATATCAGAATATATTTACTATCAATATACTATTGTACTATACTAT
TACTATATATTTCTATTACAGAATATATTGCTGTCAATAACAGCCTCATGTAGGCTAGCAAGACAGCTGACATTTCACT-
-ATTGTAACCCAATAAATTTCCCAGAAGAAAACAATACCAGAAGGATAAGCTAGTATCATCTTTACAGGAGAAAAGAGCT
CAAGCCTGATATTAACCCTTTGTTCCCACATGTGTAGTCTAGTTCCCTACACTGTTCCTTTTATCTCGATTTATCTCTCA
CTCTCATTTGCTCTCCATTTCCTCCATCACCTTGTCCTGCAAGCTGTCATCAGCTCTCTCCTATATCCTAACTAATCTTC
CCCCTTGCACACTAGATCTGTCTAACCTTTCACAACCCATGCTCAAAGTTAATGATGTCCCCACTT----CTGCTGATTG
AGACTGATAACTTTAATGGACAGTTGACACTAATAATTTTTCCTTGT--TTTTTTTTTTCTTTTGAGACGGAGTTTTGCT
CTTGTTGCCCAGGC-------CGGAGTGCAATGGCGCGATCTTGGCTCACTGCAACCTCCACCTCCAGGGTTCAAGTGAT
TCTCCTGCCTCAGCCTCCCCAGTAGCTGGGATTATAGGCATAAGCCACCACACCTGGCTAATTTT-GTGTTTTT-AGTAG
AGGCGTGGTTTCTCTGTGTTGGTCA--CTGGTCTTGAACTCCCGACCTCAGGTGATCTGCCCGCCTCGGCCTCCCAAAGT
GGTGGGATTACAGGCGTGAGCCACCGTGCCCAGT-------------------------------CTAA--------TTT
TTCGTCACTCTTAAGAAAGAGTTCCCAAATGTTATGTCATTTGGGATGTGTCACATTTTCTGATCCCTGTGATACTAAAA
GTCTAACAGGTCTGTGCACAATATGCACCATAATAGGTCTGTGCACAAGAGGAAACTGGCAACTTAAAACCCTTAGATGT
TGCATTTTCCATGAACAAGTTATTCATATATGTAATTTCTTCTA-CTAATACATTTGCCCTGTTCTCATCCTACGTTTTC
TCATAT----CATGCTTCAGTTAAACCTTTATGTTTTCAATTAGTAATTCTTGGAT-AACCCTTGCTTCGCTTCATTATT
TGACTTCTCAAGAGCACTTACCTCTCTCTAGTAGTATTCATCATATCTGCTATTTT--GTATATATATGGCTGATCATTT
AGTTTACTATAATGTTTTAGGTGAATGCCAAGTTTACAGTAGATTAAACACCACATTAATCTTTGTCTTGATTGTAGTCC
AGTTGCTAGCATATAATCAATCTGCAACAATAATTTGTCAAATTGTGGCAGGCCAAGTTTCACTAATGCAGGCCTCCATA
ACAACTATTTCAGCACTAACTGAGTG-TT--GTTACTTTTTTTTTTTTTTTTTTT-----------AGACAGAGCCTTGC
TCTGTTGCCTAGGCTGGAGTGTAGTGGTATGATCTCAGCTCTTTGCAACCCCCACCTTCAAGGTTGAAGCAATTCTCCTG
CCTCAGCCACCCAAGTAGCTGGGATTACAGGCACCCACCACCAAGCCCAGCTAATTTTTGTATTTTTAGTAGAGACAGAA
TTTCACCATGTTGGCCAAGCTGGTCTTGAACTCCCTGCCTCAGGTGATCCGCCTGCCTCGGTCTCTCAAAGTGCTAGGAT
TGCAAGCGTGAGCCACCACACCTGGCTGATTAAGTTAAATATTAAAAGCTGAGGCCAGGCGCGGTGTCTCACGCCTGTAA
TCCCAGCACTTCGGGTGGCCGAGGCAGGCGGATCACAAGGTCAGGATTTCGAGACCAGCCTGGCCAATATGGTGAAACCC
CGTTTCTACCAAAAA--TACAAAAATTAGCCGGGTGTGGTGGTGCGTGCCTGTGGTCCCAGCTGCTCGGGAGGCTGAGGC
AGAGGAGTCACTTGAACCTGGGAGGCGGATGTTGCGGTGAGCCGAGATTGAGCCATTGCATTCCAGCCTGGGCAAAAGAG
CAAGACTCTGTCTCAAAAT--AAATAAATAAATAAATAAAAGCTGATAGAGCCAGTGCCCTTATACAAGGGCTGGAATGT
AATAGAAGCCCACCGAGAGTTTTGCCCAGACCTTTCCTGGGCCTTGAAGCATGACAAGATAACGAAGGAATCGATT--AG
GACCTGTTTAGGATTAAAAAAGTTGTA--GGGGGTCTGAAGGAACTCCC-------------------------------
-------------CAAACCTTAATGATTTAGCAGGAGAGACAAGATG-GGGTAATCACCCCAGCACCTGGACCCATCTAG
ATTAAGTAAATTTACTGAGGCTCCAGAGGAAGGTCTTTAAAACTCAGACCTTAGTTATAGATTAGAAGAAGAAGTTA-AT
CACTTATGTTTTTAGATGAAT---GCACAACTATACCTAGACATATAGCTTGGAAGGTATATAAACTCTGGAAAACTTTG
TAATTTT-AGTCGGTCTGGCAATATTTTCTAGGCCTTCTCTGTGTATGCAGTTACAGAAATAAAAACTCCCTTCTTTCCC
AGTAAATTTGCATCTTGTTATTGGGCCACGAGAATAAGCAGCC-GACCCTTCATTTGGTCCAGGAACAAAATAATCTCAT
CCAATATTTTAAGACTTCTCTCTCAAGACTGATATCCATTTCCTCTGTGTTTCTAGTTTTCAAGTCTCTGACATGTGTGA
TCCACTGAGTATTTCTCTATCATTACTTTCTACACTATGT----------CCATACCTTTAGGCTCCCATAAATGTCCTT
GGCAAACTTTCAGGACGAGACTCCCCAGAACCTTCCAGCTGTTGTGGATTCCTCTACTTCCA-ACCCCAATTACTCTGAG
TATTAATTGAATATATGCCATTATCTCCATTTGTCATCAATTAACCAAAAGAGTAGCAAAGAGGCCACTGAAAGAGGACC
CTGAATACGGGGTCATCTCAGGTCACCATATTGAAGATAAATAATTTTTGTAAATCACTTATTATGTCTATTTATAAATT
TGATGAAACA--GTCATTCACTC--TGCTGATAATAAGAGCAATCATTGCAAATGTACAGTGAGTGATGAGATCTGTTAC
ACTGCATATAAGG-------AGCAGGTATTTTTGATAATACAACATGTAAGGAGAGAATTTAATAAAATCATGCTAACAT
CAGAGAAACATTTCATGCTGAGAGAAGAGCAAATGTGAAAGGCCTAAGGCGTAAATGATTTGGTGATTGTAATATTGAGG
ATGTGTTTTGGCTTGGGAAAGAAAAGCCCTGAGAGATGATGGGTCACACAAAGATCTTGGTAGAAAAGACCTCAGCCTGT
TTTCTATTCATTGAAAGTAAAGAAAAATGATAACCAATGCACAGATAAGAACAGAATTTGTCATATGACACGAACTGGGA
GTGAAGTATTTAAGGTGATTACGAAAAGCCCTTATTACCAGGTAACCAAACATGTTTTCTTATTT-CTCCCCTTTTTTTT
T--GTCCTTAACTATTTTCATCTTGCCCATTTTCTAATTGTGCACAATCAATATCCTTTCTATTT---CTACCTTTCTTA
CTTAGTCCCATTTTAACCTTCCCAATCATGCAGGGATCTGTGAACAAGACGAACCTCTGCAGCCAGGACAGGCAGGAGCA
GTGGAGCAGCTGCTATGGCTTCTGGAATCCTGGTTAATATAAAGGAGGAGGTGACCTGCCCCATCTGCCTGGAACTCCTG
ACAGAACCCCTGAGTCTGCACTGCGGCCACAGCTTCTGCCAAGCGTGCATCACTGCAAACCACAAGAAGTCCATGCTATA
CAAAGAAGGAGAGAGAAGCTGCCCTGTGTGCCGGATCAGTTACCAGCCTGAGAACATACGGCCTAATCGGCATGTGGCCA
ACATAGTGGAGAAGCTCAGGGAGGTCAAGTTGAGCCCAGAAGAGGGGCAGAAGGTTGATCACTGTGCACGCCATGGAGAG
AAACTCCTACTCTTCTGTCAGGAGGACAGGAAGGTCATTTGCTGGCTTTGTGAGCGGTCTCAGGAGCACCGTGGTCACCA
CACGTTCCTCATGGAGGAGGTTGCCCAGGAGTACCACGTAAGAGACTGGGATGGAAGGAAGAGAGGGCAGAAAATGGGAC
CTCATAGAAAATTTTCACTTTGCCTTTGACATTAATTGTCTTGTCATCATAGACCTGAGGCCTGGGATTATTTTTTT---
----------------CGTGCTACGCTTAACTTCTGAGGCTTGAAGGACGGTTTTTT-----------GCATTTCATCCA
ATTACTGGAGAATAATCCTAGAGTATATATTCCTGGCCAGGAGTAAATATTTTGTACCTTGGGTTAGATGGGTAGAGATT
TGGTGTCCAAGAAAAGCTCTGATTACCCCTTTCAGCAGGAGGGTAACTGGAGTGGGTTGAGATACATGTTCTTTCCTTGC
TGCAGGATCAGATTTTTCTTCTAGGACAAAAAGAATCAGTCTACTCATGGTGAGGAGATGGGGAGGTCTATTACCTGAGA
TGTAGGGAGCACATTCGCCAATGTAAGTTTTCTTCCAAGTCATGGATTCTCATTGCCATTCTCACAGTTTCTGCAAATTT
GTTTCTTCTGAGATCAACCTGATTT----CACGTTTATACTCTATCTA----GGTGCTGGGAAAGCTCATAGCTTGACTA
TGGTGTGATTCCTTTCTCACAGGTGAAGCTCCAGACAGCTCTGGAGATGCTGAGGCAGAAGCAGCAGGAAGCTGAAAAGT
TGGAAGCTGACATCAGAGAAGAGAAAGCTTCCTGGAAGGCAAGAGGATGTGGTTCCCGAAGGAGTTAGCTGGAAATCTGG
GCAGGACCATGGGAAGGAGCTTTTTTCCTGTTTATTCCCTGACACTTGATAAGTCCAGATGTCATTTGATTAGTCCTCTT
CATTCTTTCCCTGATGGGGTGTGGTGGCTGGGGAGTAAATATGCCACAATGAACACAGAAATCTGTAGGGAGCTGTTTAC
ATGAAGGATCTCTCTGGTGAGGATGGCTAGTGAATCCTGCATTCTATTTTTGTGCTACTTTCTGAGTCCATGACTCTACT
TTAGGAAGACATTTGGCGGTGGCTCATGATTCTTTCCTCAATGTTCAACTTTTGTCAGGGAGTTTGAGCTTGGGCTGATA
AAAGTAATATAGGCAGGCATGAGTGTCCCGGACAACTGTGTGAAAGGCAAGCTACATCCAGGTAACCCATTTTGACTCAG
AATGAACCT---CAACATACCCATTCAAGGTCATTGTTTTAAAATGTCATGAAGGAAAAGAAA---TAGGAAAA-TCAGC
TTTCCTAAGACCTACTCTCCTGCTACTGTGTCCC-ACCTTGTGAGAACTCCCCAAAAGAAACAGTTCTTTTTCTGACTAA
C-GCCTCTGCCTGGTAGACTGAGTGCCCCTTTCTCTTTTCTCATCTCTGAAGATTCAAATAGACTATGACAAAACCAACG
TCTTGGCAGATTTTGAGCAACTGAGAGAGATCCTGGACTGGGAGGAGAGCAATGAGCTGCAGAACCTGGAGAAGGAGAAG
GAAGACATTCTGAAAAGCCTTACGAAGTCTGAAACTGAGATGGTGCAGCAGACCCAGTACATGAGAGAGCTCGTCTCAGA
TCTGGAGCATCGGTTGCAGGGGTCAGTGATGGAGCTGCTGCAGGTAAAAAGTGGAAAGAAGCCTGAGCATTAAGATTAAA
GAAAAGTGAAGGCTATTTCCTTTTCTGTGTTGCTGTGCTCTTTCTAATATTAACAATGTTCCCTGCAGGACCGCTTTTCT
GAATAAATAATAATAAATAAATAATAATTTTTCT------------------GAATAATTGAATGTAGAAGTAGCAAGAG
ATAATCCCATTTTTATTAATTTATCC-AGAGCAGTACACAAATTTGACATAGTAGAGATGATCAATTAGCTCTAGTTATG
TTTGATGGGTTCCTGTTCTCTGTAATCCAGTGTTGAGCCCTTATCAGTGTAG-TTTTCATTGCTTAGCTTAGCCACTGGC
AAACAAATACATGTCAAAATACAAGATGC--TTTTTATTGTTTCCCTTCATGAAATTAATTGAGA-CTTTT-CCTCTTT-
----ATTTT-CTGAAAAAAAA-TAAGTAACTGCTATCACTTCTTCTTTATATGCTGAATAGAATTCACTAGTAAA--GGT
CGGGCACGGT----------------------------------------------------------------------
----GGATCACGACGTCGGGAGATCGAGACCATCCTGGCTAACACGGTGAAACCCCGTCTCCACTAAAAA----------
--------------------------------------------------------------------------------
--------------------------------------------------------------------------------
--------------------------------------------------------------------------------
--------------------------------------------------------------------------------
--------------------------------------------------------------------------------
--------------------------------------------------------------------------------
--------------------------------------------------------------------------------
--------------------------------------------------------------------------------
--------------------------------------------------------------------------------
--------------------------------------------------------------------------------
--------------------------------------------------------------------------------
--------------------------------------------------------------------------------
--------------------------------------------------------------------------------
--------------------------------------------------------------------------------
--------------------------------------------------------------------------------
--------------------------------------------------------------------------------
--------------------------------------------------------------------------------
--------------------------------------------------------------------------------
--------------------------------------------------------------------------------
--------------------------------------------------------------------------------
--------------------------------------------------------------------------------
--------------------------------------------------------------------------------
--------------------------------------------------------------------------------
--------------------------------------------------------------------------------
--------------------------------------------------------------------------------
--------------------------------------------------------------------------------
--------------------------------------------------------------------------------
--------------------------------------------------------------------------------
--------------------------------------------------------------------------------
--------------------------------------------TACAAAAAATTAGCCGGGTGTGGTGGCAAGTGCCTG
TAATCCTAGCTACTCGGGAGGCTGAGGCAGGAGAATGGCGTGAACCCGGGAGGCGGAGTTTGCAGTGAGCCAAGATGGCG
CCATTGCACTCCAGCCTGGGTGACAGTGCAAGACTCCATCTCAGAAAAAAAAAAAAAA-CGAAAACTGCTCTCATCCCAA
TTTTCATGATGTTAACTATAATTG-------------CCACATTGTGCAATAGAGCTTTTAAAGATAGTCTTCTTTTCAT
TCTGGAGTTGGTATCCTTTTACCAATATCGGCCTGAACTCTCCCTACACCCCAGCTCCTGGAAACCCGTCTTCCACTCTC
TACTTTTAT-----------------------------------------------------------------------
--------------------------------------------------------------------------------
--------------------------------------------------------------------------------
--------------------------------------------------------------------------------
---------------GAGCTCAACTATTTTTTACATCTACATACTAAGTGATATTATACAGTATTTGTCTTTCTATTCCT
GACTTACTTTACTTAAAGTTCTCCATGGTGTGAGATAGTCTTCTGCATATGGCTATCCAGTTGTTCCAACATAGTGTATC
GAAGAGC-------CTGTCCTTCCCTCAATGAATGCTGTTACCACTGTCAAAAACTAACTGATCATAAAGGTATGAATTT
TTTTCTGGGTTACTATACTGTTCCATTGGTCTATGTGTCTGTTTCTAATGTTAGCACTGTACTGTTTGGATTACTATAGC
TTCATAATATATTTTGAAGTCAGGTA---TGATGCTTCCAGCATTATTCTTTTTGTTCAGGATTTCTTTGGTGATTTAGG
GTCTTTTCTGGTCCCATACAAACTTGAGGGGTTTTTTTTTTTTTTTT---AATCTATTTTTGTAAGAAATGTCAGAATTT
CAGTAAGGATTGCATGGAATCTGTAGATTACTCTGGGTAACATGTACATTTAAGGATATTAAAACTAGACTACCACCATA
TTACAATTCATCATTACAGCAGCCTTAGAGCAGGCTTATAAGAGGTCCTAAAGGGAGTGCTAAACATGAAATAGAAAGAA
CAAC---TGATACAAAAAAAAAA--------CACACTAATGCACATACCCTACAGACAATATAAAACAAGTACACAATCA
AGTCTACCTAACAGCCAACGAACAGCATAATGTCACATATCAATACTAACCTAGAATGTAAATGAGCTCAATCCCCTACT
TAAAAGACATAAAGTGGCAAAAGGAATAAAAAGATAAGACTCAACCCTGTCTGCTGTCTTCAAAAGACCCATC----ATG
TAATGACACCC----ACAGGCTCAAAGCAAGGGAGTGGAGAAAGACCTAATGGAAATGGAAAACAAAAAGGAGCAGGAGT
AGCTATTCTTATATCAGATAAAACATACTTTTTAAAC-AATGACAACTAAGGACAAAAAAGAGCAAACATGATA--GGGT
ATCATTCAACAGGAAGACTTAACCATCTTAAATATATATGCACCATAGGTGGGAACACTCAGATTCACAAAACAAACTTT
TCTTCACCTGAGAAAAGACTTAGATGACCTCACAATAATACTGGGAGACATCAACATTTCACTGAAAGCATTAGACAGAT
CATCAAGGCAGAAAACTAACAAA----CTCTGGACTTAAACATGACCCTTGACCAACTGGATCTAATACACATCTACAAA
ATACTTCATGAAACAACCACAGAAAATACATTTTTCTCATCTGGACCAGAACATATTCTATCATCAGTCACATGTTGAGT
CATAAAGCAAGTCTCAATAT-TT----ATAAAAA-AAAGAAACAAA-----ACTGGCCAGGCACGGTGGCTCACGCCTGT
AATCCCAGCACTTTGGGAGGCCTAGGCGGGTGGATCACAAGGTCAAGAGATCGAGACCATTCTGGCCAACATGGTGAAAC
CCCGTCTCTACTAAAAATACAAAAA-TTAGCCAGGCATGGTAGCGGGCACCTGTAGTCCCAGCTACTCAGGAGGCTGAGG
CAGGAGAATGACGTGAACCCGGGAGGCGGAGGTTGCAGTGAGCCAAGATCGCACCACTGCACTCCAGCCTGGGTGACA-G
AGCCAGACTCCATCTCGAAAACAAAACAAAACAAAACAAAACAAAAAAAGCTGAAATCATA-CCAAGCACACTTATGAAC
TGCAGTGCGATAAAAA-TAGAAATCAATATCAAGGAGACCTCTCAAAACTACACAAATACATGCAAATTAAACAACTTGC
TCCTTAATAACTCCTGAGTGAATACTGACATTAAGGCAGGAATCAAAAAA-TTATTTGAAAACTATAAAAATAAGAACAA
AACTTATAAAAATCTCTGACATGCAGCTAAAACAATTAAGAGGAAACTTCATAGCACAAAGCACCTTCATTAAACAGTTA
GAAAGATTTCAAATTAACAATCTAACTTTCCATCTAGAAGAATGAGAAAGAAAAGAATGAACCATTCCTCCAAGGTAGCG
GAAGAAAATAAATAAGTAAAACTGGAGAAGAACTGAATAAAATTGAGGCACAAAAACCCATGCAAAAGATTACTGAAGCT
AACAGTTGGTTCTTCAAAAGAATAAACAAAACTGGGTTTTCAGATTTGTTGTTTCCT-ATGTTTATGTCTGTACGTTTGC
CGAAGGACATAATTTAGTTTCTGTGCACTGGCTTTGTTT----TCCAAGATTCTAGGCATACTGTCTGCTATGGTTCAAG
GGCAAGCTTGCTGCTTCAGCATTCAGGCAGGGTGGTCCAGAGTCAGGAGGTGACCAGGCCTGGCAGCTGACTCTACGGGG
TTGGACCTATAGCCTGGGTCCATGACAGTGAGCCTAGAGCCTGTATCTCTGGGG-CTATCCTGAATCCTCAATTCACAGG
TCTTGATCTGATACTGCAGCGGGCCTTGAGCTAAAGTTAGCAGAATTCGGCCAGTTCATGGGCTCTGATCTGGCACTAGG
GTCCACTGGGAGTGGACCTGGATCCTAAGTATACTGGCGCCCAGTCTAGACTCTCTAGGTCCTCTGGAGCCTGGGCCAAC
AGTGACCCTCCTGGTGCTGGGGCCAGTGTTTAGTCTGGGTTTGCTAAGGCGAGTCCGGAGCCCAAGATCACAGGCACTGA
CCT----------------------TGGTGCTAGAATAGAAGCTGATTGTGCAGGTGCTATCTTAGAGCGTAGGTCCACA
AGTACAGACCTGGGTCCTGAGGCCTCGGGGGCTGGCCTGGAACAAGGATACACAGTGGCAGAGCTGGAGCTGGATGCAGT
CCAGCAATGTGTTCTATTTGTACAGGCTTTGCACTCGGTGTGCTGGAGCAGGCCTGGATTCTGAGTCTGCTGGCTTGTGG
ACTCACAGGATCAAGCCTGGAGGGTAAGGCCATGG-------------CACTGAACAGGCCTGGAGCCTGTGTTCTCAAA
TACCTACCTGGTGTTTGCGGCCAAGGGTGCTGAGCTGGCACTGTAGTGAGACTGAAGCCTGGAGCCATAGGGGATGCTGT
GGTGTTGGGTGGGCCTGTGTCATGTGTCTGCAGGACCTAGGCTGAAGGATGTGTCTGCAGGTACCCATGATGACTAATAC
TGTGGAAGTCAGTGTGATGCTGTGGCAGACTTAAAGCCTGGGGCCA----------------------------------
----------CTGGGGAAAGCCTGAACCTAGGCCATGCTAGAAGGCTGATTCTGTGGGGGCTGACCTGGCACCAGGGCCA
GTATGCACCCTGGGGTAAACCTGGCTCTGGGGCAGGATTATAGACTGAGTCCATTGGGCAGGACTTGAGCCTGAGGTTGC
GGGATACTGTGTAGCATAGGGCTGGGCTTGGAGATTCGGTCCGTGGGTACTGGCCT-------GTATATGCAGGGACTGA
ACTGAAGGCTAGGTTCAGAATTGTCAGCCTGATAACTAGGGATACAGGGCTAGATCTGGTGCTGGTATGGGCCAGAAGCC
TGTGGCCATCAGGGCCTGAGGTCAGCCTGGCTGTGGAGCCAATCTGGAGCCTGAGGCTATCGGACTGTCCTGAAACTGAG
AATGGTCCAACCACTGAGGGCAACCTGCCATTTAGATGGCCCGTAGACTGAGTCCACTAGTCTCAC----AGCCTAGGGC
TGTGAGATACAGCCTGGAGGCTTATCCGTAGATACCAGTCTGGAGTCTGGTGCCTTCAGACCTGCCAGATGGGGTTTTAC
TAGATTGAGCCCAGTGTTAGGGCCTGAGGTAACTTTTGGTGCTGATTTTCCCCTCTTTCTCCTTGTGGGGGTTACCTCTC
ACATGCTATGCTGCCTAGAGTTGTAAGAGTTGTAAGTTGTAGAGTTGTAAATGGAAAATGTAAAACTGTCCTTCCTACAT
TCTTCCATGAGTGTTTTTCTCATTTCTGTGCTATACCCAGATGCTGTAAGCTCCCACCCTATTTCTTAGTTCTGGTGAGG
TGTTTTAGTTCTTGGATGGTGGTCTAAATTGTTTTAGCGGGGAGACAACTGCTAGAGACTCCTATGATACTATTTTGCTG
ACACCCATCTGCAATTCCTTTCCTTTCTATCTACAGCACACACACTTATGTCTCCTCTTTTATTCCTGATTTTGGTGATT
TTGTTTTCTCTCCCTTTTTTTGTCCTTTCAGTTATATTTGG-TCAATTTTATTAACTTTTACGAGGTTAAAAAGGCTTTT
TGCTACATTGATTTTTATCTTTTTTT-AACCTTTCTATATCGTTTCTGCTCTGATCTTTATTATTTCATCTTTTTCATTG
AGTTTTTTGTTGTTGTTCCTTTCCTTATGTC-CTAAGGTGAAATCTTAGATACTGTGAAATCTTTTTTTT--CTGATATA
GTGTTTATTCAGTGAATTGTTTTAACTGTATCTCATACATTTTAATTTTTGAGTTTTCATTCAGCTCAGTGTATTTTCTA
ATTTTCTTTGTGATTTTTTGGTTTTCTCTTGGGTTTTTCAGAAAAGTAGTGTTTAATTTTAAAGCATTTAAGAATTTTTT
AAATATTTCTTCTGCTGTGGATTTCAAATCCCATTCCTTGGTAATCAGATAACTTGTTGTATCATTTGTTAATGCATTAA
AACTTA-----CGGTATGGAACATTACATGAGCAGGAAAATGTTTTATATGCATTTGAAAAGAATATGTATTTTGCACTC
ATTTGGTGAAATAATCTAAAGATGTCCGTTAGGTCAAGCTAACTGATAGTGTT-GTCTTCTATATCCTTTATGGTTTTTA
TACCAGCCTTTCAATTAATTACTGAGAGTAAATTATTGAAATCTTCACCAGTTGTTACTGAGTTGTCTGTTTTCCATTTT
TTAATTCTTTATATATTGTTTTCAGTATTTTGAAGCTCTGTTGTTAAGTGAAGATACACTAATATTGTTATTTCCTCTTG
ACATATTGAACCTTTCTTTCATTATGAAATATTCCTGTTATTCTCACTTAGCAGTTCTTGCCTTACAGTATCTTTGGTCT
AATATTAATATATCTACTTGAGTTGTCTTATGGTTAAAGCTTTCATAGTATATATATTTT-ATTTCTACTTTGGGTTTAT
TTATGCCTTTGAATCTAATATATGCTCTTCTGTAGTTAGTGATAACTGAACCTTCTTCTTTGCCCAGTCTGTCTGACGGT
CTCTGACTTTCCATTTGGGTTTTCATTATAACATTTAATGCAATTATTGATACAGTTTTACTTAAATTTACCATTTTGCT
ATTTGTTTTCTATATTTCTGCTGTCTTTTTTGATGTTGTTATTTTCTATATCCTTAACTGGCTTCGTTTGTGTTAAATAA
ATATTCTCCAATGTATATTTTTAGTTTTTCTCTTTTTCAGCTGTATGACACTAGTATTCTTCCTAGTGGTTGCTTTAATG
ATTACAATATGCATCTTGTCCTATCACAGCCAGCTTCTGATTAATAGTAACTTAATTCCAGTAAAATACAGAAACTTTCC
TTCAATACTGCTTCATTTTCTTCATCTTTGGTTATCATTTTGTCATATATCTCACATGCACATATGTTATAACCTACTAA
TATAGTATTGAGTTACTTTGTAATAAACTTAATGTCTTTTGAAGTTATTAAGAAAATACTTTGGGAAATAAACTATAGCT
TCTTTTATCTTAACTCACATTTTATAGTATTACCATTTTGTTTAGGTT----------TTGAGTAAATCTTTGGAGGAAA
TTAATTTCAACTGAAGAAAATTTTAAAAATATTTTTGGGAAGAAATATTTATGGGAAGAAATATTTTGCAAGGGCTCACA
CCTGTAATCCCAGAAATTTGGGAGGCTGGGGCAGGTGGATCACCTGAGGTCAGGAGTTAAAGATCAGCTGGCCAACATGC
AGAAACCCCATCTCTACTAAAAATGCAAAAATTAGCTGGGCATAGTGGCATGCGCCTGTAATCCCACCTACTTGAGAAAC
TGAGGCAGGAGAATCACTTGAACCTGGGAGGCAGAGGTTACAGTGAGTTGAGATGGTGCCACTGCACTCCAGCCTGGACA
ACAGAGCCAGACTCCGTCTCAAAAATAAAAAAGAAAAAAA---GGAAAAAACATTTTTTCTTCCATCTTCCAGCAACAAA
TTCTCTCAGTCTTCATCTGAGAATATTTTTT-CTTCATATTTGAAGAAAATTTTTGCTTTATATGGAGTTTGGAGTTGAT
AGTTTCTTTCAGTGCTTTCAATAAGTCAATCTAGTCTTTTCTGTCATCTATTATTATTTAGATGAGAAGTCAGCTATTAA
CTATATTGAAAGCATTCTTTATATAATGATTAATTTTTCTCTTGCTGCTTTAATTTTTTTCTTTGCTTTGATTGTAGCTT
TTGGAAGTTTTTCTATGATAAATGGATCTC--ATTAGTTATTTAACTTGGGATTCATTGAACACA--TGACTATATTGAT
ATAGATGAAATATTAATTTTTATAGAATTTAAACTATTTTTCCCCAATTATTCTTTTCTACTTGAAAATGTAGCAACATA
CATGTAATAGGTCTTAAAACAGGTTTTAGAAATCTTTTCCTCTCTTCTTTCCTTCTGGAAGACCTATTACATGTACATTG
CTACATTGCTACATTGTGACATCTGACATGTCTTTGAGGCTACTTTTATTGTTTAAGTCTTTTTTCTCTCTGTTCTTTAA
ATGAGAAAATTTTTATTGATGCAGCTTTTCAGGTTCAACGACCTTTTTGTGTGCTGTGGAGCACTTTTAGCAAATATTTC
ATTATTGTTATTTTACTTAAAATTTTCAGAATTTTTATTTCCTTATCATTTCTCTCTCTT--GAGCGTATCTATTTTTTT
GAGTCATTGTTTTT-ATACGTCAATCCTTTAAACATAGTTCTCCTTAGTTTTTTAACCTATTTGCAATAGTTGCTTTGAA
GTCTTT-CTCTTCTAGTTCCAACATCTGGGGCCACTTGAGGATATTTTCAATTTATTGTTTTG-GGGGTTTT---GTGTG
TGTGTGTGTGTGTGTGTGTGTTGTTTTTTTTTTAAATCCCCCTGAGCTGTGGTGTTCTATCTTGTTCTATCTTGTTTCTT
TGTATGTGTATACATTTCTTTTGTAAATA-AAATATATATATATATATATA----TTTTAGACAGAGTCTCACTCTGTCG
CCCATGCTAGTATGTAGTAGTGCGATCTTGACTCACTATAGCCTTGACCTCCTGAACTCAAGCAATCCCCTCACCTCAGT
CCCCAGAGTAGCTGCGACCACAGCTCCACACTACCATGCTCACCTAATTTTTGTATTTTGTGTAGAGATGGGATTTCACC
ATGTTGCCCAGGCTGGTTTCAATCCACTTGCCTCAGCCTCCCAAAGTCCTGGCATTACAGGAATGATCCACTGCAGCTGG
TCAAAATGTACAGTTTTGTTACTTTGTAGTTTCTGAGACTTCCCATCCTCTAGTCTCTACCCAGCAAGAAGTTTTCCTGT
ATCTTCATTTAGTTACTTTCCTATGGTTGCTACTGTCTCTGCTGTGTTTAAAGAAAACTCAAATATAAATTTTAAGTTTG
GCATCCTAGCTTTGCCCTGTGTGTCCATGTATCTTTGGTTTGCCTCTAATCTGGAATAGAAGTTATATTCAATCCCCTCA
AGGCAGTAAGGCTTCTGTCCTCTCCTGATGAATCTGTGCTTGGGTTAGTGAGATTGCCCAAATTAATTCAAAGTTAAGGC
TGTTTTAAAATCTGCTACAATTTACTCACTGATATGTTGTTTCACTTATCCTTTTCCATATGTGTGTGTCTTTAGCATGG
CCAGGGTTGCATATAACTTACTTCTAGTTAAGTTAATATATGTAATTCCTGTTGTTTCCAGCCACAGTGCATTAGTGCTT
TTAAGATGGGCATCTGGGTTGG-CACGGTGGCTCGTGCCTGTAATCCTAGCACTTTGGAAGGCAGAGTCGGGCGGATCAC
CAGGTCAGGAGATCGAGATCATCCTGGCTAACACGGTGAAACTTTGTCTCTACTAAAAAAATAAAAATAAAAAA------
-TTAGCTGGGTGTGGTGGCGGGAGCCTGTAGTCCCAGCTACTCGGGAGGCTGAGACAGGAGAATGGCGTGAACCTAGGAG
GCAGAGTTTGCAGTGAGCCGAGATCGCGCCACTGCACTCCAGCCTGGGCGACAGAGTGAGACTCCGTCTCAAAAAAAAAA
AAAAAAAAAAAAA-------GATGGGCACCTAATCCAACGCAGACAAATGCCACACAAGCT-TAAAAGTTTTTTATGTTA
AAACTTAGAAG-----TTCTCCTTTCTCCTGGGGTTTGTATCAGGAGAGTTACATTTCCTTCATGTACAGAGAATAAACT
CAATATAGAGGAATAAGTAGAATTTGGAGAAGGACATTGATCACATTTTTGTTTTTTGTTCTCAGATGGAGTCTCACTCT
GTCCCCCAGGCTGGAGTGCAGTGGCATGATCTTGGATAACTGCAACCTCCGCCTCCTGGGTTCAAACAATTCTTGTGCTG
CAGCCTCCCGAGTAGCTGGTATCATATAGGCATGCGTATTTTTTGAAGAGACAGGA------------------------
--------------------------------------------------------------------------------
--------------------------------------------------------------------------------
--------------------------------------------------------------------------------
--------------------------------------------------------------------------------
--------------------------------------------------------------------------------
--------------------------------------------------------------------------------
--------------------------------------------------------------------------------
--------------------------------------------------------------------------------
--------------------------------------------------------------------------------
------------TTTCACCAGATTGGCCAGGCTGGTCTCGACCTCCTGACCTCAAGTGATCTGCTCGCCTTAGCCTCCCA
AAGTTCTGGGATCACAGGCGGGAGTCACTGTGCCTGGCCCATAGACCGGATCTTGATG--ACAAGGTTTGAGTTTCAAAA
TTCAGCTATGACTGAAGTTGTAATTGCCCTTTCCAAAATCCTTTTCACCA-----------------------------T
TTAATCCAGTTTTATTTGGTTTATGTTACATATAACATAAAAGTACTAATACAAAAAAGCAAAACTATTTGATTGTATGT
GTAGATCCAGCTATTGGCTTTGTTCTTG-AAAAAAAATCTATGTGGAAAAGTTATGTCTGGCATAAAGGAGACCAAAGAC
ATTTCATTGGTACATATCTGCTAAAACAAAA----CAATATTTGTG---ATAAAGAGGAGTAAATGA-------------
--------------------CCTAAAACCATTAAGAATGTAGCCTAGCTGGGTGCAGTGGCTCACGCCTGTAATCCCAGC
ACTTTGGGAGGCTGAGGCAGGCGGATTGTCTGAGGTTGGGAGTTCGGCACCAGCCCGACCAACATGGAGAAACCCCATCT
CTACTAAAAATACAAAAAAATTGGCTGGGCGTAGTGGCGCACACCTGTAATCCCAGCTACTCAGGAGGCTGAAGCAGGAG
AATCGCTTGAACCCAGAGGGTAGAGGTTGCGGTGAGCTGAGATTGCACCATTGCACTTCAGCTTGGGAAACAAGAGTGAA
ACCCTGTCTCAAAAAAAA---------------------GAAAAGAAAAAATAGAATGTAGGCCAAACTGACCTGGTAGA
GACTA--GAGTTCAGAGTAAATGTAGTTTTTAAGACAATGACTGAGTAGATATTAGTAATATTATGGACAATGTGGTATA
AGAGAGAAGACAGTATGGTTGGTGTTATATAATAAAAATTCTTAGTTGTTGATCCTTGTTGCTCCTTCACTACTGAATGC
ATTAAACTGCATTTAAGTGACAAACCTGGGTAAAAGTAGAGAAT-GGAAAATCAATTGCACATATGTGTGT--CAAACTT
AAGGAAGTAAATGAAGTCAGTTACAGTTCATGTCTAAAATGAA--GAGAGCAACCTTAAGAAGTA---------------
--------------------------------------------------------------------------------
--------------------------------------------------------------------------------
--------------------------------------------------------------------------------
-------------------------CGTAGGCCGGGTGTCATGGCTCATGCCTATAATCTCAGCACTTTGGGAGGCCGAG
GCAGGTGGATCACTTGAGGTCAGGAGTTCAAGACCAGCCTGACCAACATGGTGAAACCCCATTTCTACTAAAAA-CAC-A
AAAAATAGCCAGGCAT------TGTGGTGGGCGCCAGTAATCACAGCTACTCGGTAGGCTCAGGCAGGAGAATGGCTTGA
ACCCAGGAGGTGGAGGTTGCAGTGAGCTGAGATCAGGCCACTGCTCTCCAGCCTGGGCAACAATGTGAGACTCCTTCAAA
AAAAAAAAAGAAAGAAAAAGAAGAAAGAAAGAAAAAAAGAAGGAAGGAAGGAAGGAGGGAGGGAGGGAAGGAAGGAAGGA
AAGAAAAGAAAATATCTATACTTGTTTCGTACACTTGTTTGCTTATAACCTCAGCAAAAGCCACATAAACAT-TTGAGCA
CTATTATTCATTCATCTTTGATTCTTCAAAACGTGACATAATGCCTGCAGAATAAGTTTATATATAA--GCTTTGTTGTT
TATTTTTGTG---------ATTTTGTTTT----TGTTT-AGTAATGGGGTCTTACTCTGCAACCCAGACTGGAGTGCAGT
AGTGTGATCCTAGCTCAATGCAGCCTCAGTCAAACTTCTGGGCTCAAGAAATTCTCCCACCTCGGCTTCCCAAGTAGTTG
GGACTACAGGCTCATGCCACCATGCTTGGCTAATTTTT----TTTTTATTTTTTGTAGAGATGGGGTCATGCCATGTTGC
ATAGGCTGTATATCTGTTTAATAAATCAATGAAGCGGCTGGGCATGGTGGCTCAAGCACTTTGGGAGGCTGAGACAGGAG
GATCACGAGGTCAGATCGAGACCATCCCGGCTAACACGGTGAAACTCCGTCTCTACTAAAAAAATACAAAAAAACTAGCC
GGGCGAGGTGGCGGGCGCCTGTAGTCCCAGCTACTTGGGAGGCTGAGGCAGGAGAATGGCGTTAAACCCGGGAGGCAGAG
CTTGCGGTGAGCTGAGATCCGGCCACTGCACTCCAGCCTGGGTGACAGAGCGAGACTCTGTCTCAGAAAAAAAATAATAA
TAAACCAAAGAAGCACTAATTATTTAAATCATTTCATGGAGAGCCATATACGTTTGGAGAAAAA--CAAATTGGCAGTCA
CTTCTTTTCCTTCTAAACATGTCCCATC-----TGCAGAAACCAGAAACCTCTTCCACAAGGATGAAAGCTATTTCTGCT
TTTAAGGGAACTTGAAAACCTCACATGAGTCTTCTGGGATGATTGCC--CTGAGT-------------------------
--------------------------------------------------------------------------------
--------------------------------------------------------------------------------
--------------------------------------------------------------------------------
----------------------------------------CTTATCTGAGCTTTTTT-GTCTTTCACACTGTCACCATCT
CCATTCTCAGCACATTAGGGACTGGGGGAAATGTGATGAAACTTTCTAAGTGAGGAGAGACTATTTATTTCTTAATTGAT
GTTTTCTCTCTTCTTCCCAGGGTGTGGATGGCATCATAAAAAGGTATGTGTGGGAGGACAGAGATGGT--CCTTTTGTGC
AGTGAGGAGAGATTTATAGCCATTA-------------------------------------------------------
--------------------------------------------------------------------------------
--------------------------------------------------------------------------------
--------------------------------------------------------------------------------
------------------------GAATTGTCCTGGGTTTAATTAGAATAAAACATCTCCCAGGGCAGAAAAATTTTGAT
ATTGTTTTATCAT-----------AAATTTCTGGTCACAAATCAGCATTTGAATGTTCTGTAACTA--------------
--------------------------------------------------------------------------------
--------------------------------------------------------------------------------
--------------------------------------------------------------------------------
--------------------------------------------------------------------------------
--------------TTAAGAATAGACCAGATTTGGCCAGGTGTGGTGACTCAAGCCTATAATCCCAGCACTTTGGGACGC
CAAGGCAGGCAGATCA----------GGAGTTTGAGACCAGCCTGGCCAACATGGCAAAACCCTGTCTCTATCAAAAAAA
AAACA--AACAAAAATTAGGGGGG-TGTGGTGGCACACGTCTGTAATCCCAGCTATTTGGGAGGCTGAGGCATGATAATT
GCTTGAATCTGGGAGGCAGAGGTTGCAGTGAGCCAAGACTGTGCCACTGCACTCCAGTCTGGGTGACAAAGTGAGAGTCT
GTCTTAGAAAAATCAA-TAAAA---------------TTAAAGAAAAAAAAA-GGAATAGACCAGATTCTATGGCAGAAA
ATTTGGGTAGTGGAGACTC--AGTGTGGGTCAGTAGTGGTTTCAGGGATAAGGTGTTGCAGTATCAGACCCCTGTGCCAT
CACCATTTTATTACCTACATCTAGTTCTGTTTCTGTATTTAATAGGTACTTGACTTATTTTGAAAGGGCCATGTCTTCTT
TTTCTGCCATATACCCCTAATTGTCCATTGGGACAATTCCCACATGTTTGTATTTTCCTCCTGGAAAAAGA---------
--------------------------------------------------------------------------------
--------------------------------------------------------------------------------
--------------------------------------------------------------------------------
-------------------------------------------------------CCAGTTCCTTCTTCATTTATATTTA
GATTTCCAAAATCAGATGTTTATTTGTGGAATAATATTTCAAAATAATATTCTGGATAATATGTGGTTATGGTACAAAGA
ATTGATCCATCTCAGTTGCATTCTTTAGAAGAGCATAAAAAGTTGCTATTCTTGTGTCTAAAATTGCATACCTCACACAC
CTATGTGGTGGTATCAAGTTCTTTCTAACCACATGAAATTCAGGCCAGTAATAGTTTGGTGC--GCATAATATCTCATTT
GCCAAGTGTTTGTAATTTTTCCCAGAAATCTGAAACCTTAGCTGTTATCTGAGTACCTCCCTGCTGGGAATAGCTTTGAA
GGCCTTAGGCCTCTCCAAACAGGACTCCTCT--TGATATGTCTCAAA--TACCCAGGAGCCAGGTTCGCCAGGTTCTGCA
ACCTAACTTTCTAACCATCTCCCTGGGAACTCA-CATACATAGCGATGATGTTTCCACCCATTAAATGTTAGGGTTTCTT
TTGTAAGGCACCAAAGTTTTGTTTTGTTTTAAAAT------------------------------------CCTTTTTTT
TTTTTTT-----ATGTTATATGAGTTTAAAAATGTAGACAGG--------------------------------------
--------------------------------------------------------------------------------
--------------------------------------------------------------------------------
--------------------------------------------------------------------------------
-------------------------GAGAGGTTAATTATTTCATTTTAGAAGCAAGACACTGTG-CTTCTGAGAGGTTAA
ACTCTTCCCACGTTCTCACAGAAAGTAAGTGGGAAGGTAAACAGGAGAATATTTTGTTTACCTCCAGGGTCAA-------
--------------------------------------------------------------------------------
--------------------------------------------------------------------------------
--------------------------------------------------------------------------------
-------------------------------------------------------------------------GAGTGTG
CACTCTCCCTTCTCAGGATCCCCAAGAAGAGAGTTCA-GTGCATCAATGGGCTGAAATGATAGGAAGTCAGGGGTGTTCC
AGGGACACAAGGTCAGAGGTTTGGAAG------CATTTTTTTTTTTTTTTT-AACTCTTAGGATTGAGGACATGACCTTG
AAGAAGCCAAAAACTTTTCCCAAAAATCAAAGGAGAGTGTTTCGAGCTCCTGATCTGAAAGGAATGCTAGACATGTTTAG
AGGTGAGGAGAGCTGGATCAACAACAGGGCTGTGGAATTCATGTG------GTGTTAGGGTGCTAAATGGGGAAGAGGGT
GCAGTTTCCAAATATGGAGAGAGGGTATTGGGGAGGATAGATATTGTCTGCTGCTGATGGGATTATATTTAATGGGAAAT
GGCTAGGTGGCTGCTTCATCCCATCATTCAGCAATTTACTGCCTTAATAACATAGGGCATA------CTTTTCCAAATCT
GGAGACAAAGTGAATTTCAGTGC----------------TATTCAATATTACGCATTTTTATAATTTCAGAGCTAACAGA
TGTCCGACGCTACTGGGGTAAGGAGAAATCACATTATCATCAGCCACCCTGTGGCTTATCA--------TTATTATTATC
TTTATCTTTTA-GAATTTTATGTT--------------------------------------------------------
--------------------------------------------------------------------------------
--------------------------------------------------------------------------------
--------------------------------------------------------------------------------
--------------------------------------------------------------------------------
--------------------------------------------------------------------------------
--------------------------------------------------------------------------------
--------------------------------------------------------------------------------
--------------------------------------------------------------------------------
--------------------------------------------------------------------------------
-CTCTGTTAGGTCTCGTGTTTTAAGATTTATGATTCTCCTTCCAACACACACATAACTTACCCCTCCT------------
----------TATAACTTCTGAACAAGTTTCCTC---GTTTTCTCTCAAGTCTTTATCAAGATTTCTCTCATATCACA-A
ATAAAGTTACATTATATCCCTTAACTGACCTGTTAATTTTTCTACAGTTGATGTGACACTGGCTCCAAACAACATTTCAC
ATGCTGTCATTGCTGAAGATAAGAGACGAGTGAGCTCTCCGAACCCACAGATAATGTATCGGGCACAAGGGACATTATTT
CAGTCACTCAA------GAATTTCATTTATTGTACTGGCGTCCTGGGCTCCCAAAGTATCACATCAGGGAAACATTACTG
GGAGGTAGATGTGTCCAAGAAAAGTGCTTGGATCCTGGGGGTATGTGCTGGCTTCCAACCCGATGCAATGTATAATATTG
AACAAAATGAAAATTATCAACCTAAATATGGCTACTGGGTTATAGGGTTACAGGAAGGAGTTAAATATAGTGTTTTCCAG
GATGGTTCCTCACATACTCCTTTTGCTCCTTTCATTGTGCCCCTCTCTGTGATCATTTGTCCTGATCGTGTTGGAGTTTT
CGTAGACTATGAGGCTTGCACTGTCTCATTCTTCAATATCACAAACCATGGATTTCTCATCTATAAGTTTTCTCAGTGTT
CTTTTTCTAAGCCTGTATTTCCATATTTAAATCCTAGAAAATGTACAGTCCCCATGACTCTGTGCTCACCAAGCTCTTGA
ACCTTCTTACACACTCAGACCCTTCTGTACAGCACCTCTTGTCCATGTGCATCTCATACACCTGAACTCAGTTGCATCAT
TTTAACCATCTTTTCCTTGCTGTCTCCCTTCTTTCTATTTGAATGTCCTGCACTCATCAGTAAAATGTAATAATTGTCTT
GTGCCATATTCTCCCCAATATTTTATTGACATTTGATAGCAATTTCTTT-CATCATTTTCCATACTCCCAAGGAAATTTG
ACCTATACCTCATAAAATGAGACCACTATTTAGGTATTACTTCTGCCAAATATTTATCATCCAGTTGCCTCTGACACTGA
CTAAGAAGATGAAAAAAAGCTTTTCAACAGCCTTTCT-----ATATCATCGTGTGATAGTTGTTCACCAATGAATGAGTC
CTTAGTCCTGTGTCAGTTTACCCTTGATGCCCCTATTTGTGAAAGAGTTAAAGAGAAAATATCATAAATGGTATACTCT-
AAGTGTAGAGGTTTTGTATCTAGAGGATCTTAGTTCAACTCCTGTTGATCTTAGTTCATCTCCATATACTAGCAGTGTAA
CTGTGAATAGCATACTTAAATGGCTGTGCTTTTTTTCTTTTCTTT-CTTTCGTTTTTTTTTTTTT-------GAGATGGA
GTTTTGCTCTCGTTCCTCAGTCTGGAGTGAAATGGTGCAATCTTGGCTCACTGCAACCTCCACCTCCCAGGTTCAAGCAA
TTCTCCTACCTCAGTCTCCCAAGTTGCTGGGATTACAGGCACCCACCACCACCCCTGGCTAAATTTGTATTTTTACTAGA
GACAGGGTTTCCCCATGTTGTGTTGGTTAGGCTCGTCTAGAACTCCTGACCTCAGATGATCCACCCGCCTCGGCCTCCCA
GAGTGCTGGGATTACAGGCATGAGCTACCGTGCCCA----GCCTGTGCTTATTTTCTTAAAATAATTTTTGTATTAAAAA
CTTCACATTAAATAAGTCCTAACATTTTATTTCATAGTAGGGTGACTAGAGTTAACAATAACATTTTGCATATATTTTGA
AGTAGCTAGAAGAGAGGATTTTGAA------------------------AGTTCTCAACGCAAAGAAATGACACATATTT
GAGGTGATGGATATGCTAATTACCC---TGGTTTGATTATTACACAATATATACATGTTTCAAAACATCACACTATACCA
CATAAATATGTACATTTATTATTTGTCAATTAAAAGTAAAATAAAACAAAAAACTTTCATCTAATACTTTGGATCATTGT
GAAAAAATAAATTCCTGAAGTATAAAGCATCT
>Saimiri_bolivensis_TRIM5
GCAGCTTCTCTTAGGAAGACTTCTTTGAGCAGATCAGG-CCTCCGGATTGGTGAGTGAATCCTAACCATATCTT----CC
CTGGCCTGCCTTCACTCTTCTCCCCAGAATCACCACTTCTCTACTGGTGTCTGAAGGTGTATTGAGTGGTTT-GTGGAGG
GCAAAAGTAGGAAGTCTTTCGGACAAAACTGAATTTGCTTTGGTGAGTTTAACTTACCT-AAAAGCTGTTCCGGGGTGGG
GAAAAGACAGAGTTCACAGACTTTCTGCTGCCGGGGTTTACTAATGGGAACAGAGCTGTCTGGCACGTGGGCAGCTTTGA
AAGAAGGAAGAACTTTTTTTCTTTTTCTTTTTTCTTTTTTTTTTTTTTTTTTTTGAGTCGGAGTTTCGCTCTTGTTACCC
AGGCTGGAGTGCAATGGCGCGATCTCGGCTCACCGCAACCTCCGCCTCCTGGGTTCAGGCAATTCTCCTGCCTCAGCCTC
CTGAGTAGCTGGGATTACAGGCACACGCCACCATGCCCAGCTAATTTTTTGTATTTTTAGTAGAGACGGGGTTTCACCAT
GTTGATCAGGATGGTCTGGATCTCTTGACCTCGTGATCCACCCGCCTCGGCCTCCCAAAGTGCTGGGATTACAGGCTTGA
GCCACCACCACGCCCGGCCAGAAGGGAGAGCTTTAAAGTGAAAGGCTTTGTTTCCTGGAAGGCTGGTAATTTTTCGCAGC
TGACTCTCT-----------------------------------------------------------------------
--------------------------------------------------------------------------------
--------------------------------------------------------------------------------
--------------------------------------------------------------------------------
--------------------------------------------------------------------------------
--------------------------------------------------------------------------------
--------------------------------------------------------------------------------
--------------------------------------------------------------------------------
--------------------------------------------------------------------------------
--------------------------------------------------------------------------------
--------------------------------------------------------------------------------
--------------------------------------------------------------------------------
--------------------------------------------------------------------------------
--------------------------------------------------------------------------------
--------------------------------------------------------------------------------
--------------------------------------------------------------------------------
--------------------------------------------------------------------------------
--------------------------------------------------------------------------------
--------------------------------------------------------------------------------
--------------------------------------------------------------------------------
--------------------------------------------------------------------------------
--------------------------------------------------------------------------------
--------------------------------------------------------------------------------
--------------------------------------------------------------------------------
--------------------------------------------------------------------------------
--------------------------------------------------------------------------------
--------------------------------------------------------------------------------
--------------------------------------------------------------------------------
--------------------------------------------------------------------------------
--------------------------------------------------------------------------------
--------------------------------------------------------------------------------
--------------------------------------------------------------------------------
--------------------------------------------------------------------------------
--------------------------------------------------------------------------------
--------------------------------------------------------------------------------
--------------------------------------------------------------------------------
--------------------------------------------------------------------------------
--------------------------------------------------------------------------------
--------------------------------------------------------------------------------
--------------------------------------------------------------------------------
--------------------------------------------------------------------------------
--------------------------------------------------------------------------------
--------------------------------------------------------------------------------
--------------------------------------------------------------------------------
--------------------------------------------------------------------------------
--------------------------------------------------------------------------------
--------------------------------------------------------------------------------
--------------------------------------------------------------------------------
--------------------------------------------------------------------------------
--------------------------------------------------------------------------------
--------------------------------------------------------------------------------
--------------------------------------------------------------------------------
--------------------------------------------------------------------------------
--------------------------------------------------------------------------------
--------------------------------------------------------------------------------
--------------------------------------------------------------------------------
--------------------------------------------------------------------------------
--------------------------------------------------------------------------------
--------------------------------------------------------------------------------
--------------------------------------------------------------------------------
--------------------------------------------------------------------------------
----------------------------------TATTAAGTAATCCTGTTTACTTCTTTTATGAATGTTTCCAGGGCCC
TCTGAACCATCCAAAAAGCCAGGCATTAGAAAAGACAATTTTGAAGCTTGAAGTTTGATTTTGGCACGTCTGTTAAATGT
TAGAGGTTTGAAACACTTGATGTTATAAAATTGACATACATTATCTTTTTTGCCAAATGATTCAAAAGGCAAAAGCCTTT
CATTAACCTACACTATGACATGATAATCCTGTTTAAAGACAAATTTTACCCTTGCATTGATTTATTAAAGTTAGCCCCAA
TTTGTTTAAATGAAATCCTATAGATCATTTCATCTAATCTTAACCAATTTGAGCATGAGATGAAATCTTTACAAACCTTT
TATAACCCTTTTACTAACGGGCAGATTATTCTCTTCAGAACTCCCTGCTGTGCGTTTATTTTGGTCCTCAATTTATGAAA
AGACTATATAATACCATTTAGAGTTTAGTTAATGTTTACACATTTTTTTTTGCAAGATTATTTTTTACAATCTTTCTATA
ACTTTCTTAAATTTCTGGCTCTATCTTATCAAATTTAACATCCCTCATCCCAGGGCAAAATTTACATTTCTATACTTTCT
TATA--CTTTCACTAAAAAACATATTTTACTGTTTTTATATGCTTTGCATGTAAAACTGTTTAGTGATCTCAAATACATG
TTGCACTGTCAACTTTTAGCAACTTTTATTTTTCGTTAAGAAACCT----------------------------------
--------------------------------------------------------------------------------
--------------------------------------------------------------------------------
--------------------------------------------------------------------------------
--------------------------------------------------------------------------------
--------GGTTAGTAAGCGATTTTAATCAGGT--------TGGTTCCTAGGACCCAGACGGAAGAGCAGATAAAGTCTG
ACTTTGCAGCATCTAGTTCCATGTGTCCTAGGACTTACCTATTTATAAAGCAGGCAATATATAACCTTGGAACAGTCAGC
AAATCTAGTATCTAAGTTGTATGATTTAGACCACCTGTTTGCATTTTGACAGCACTTGCATTTTACCAATAATCCTTAAG
ACAGTTTTTATTTCTTTTTTCCTTTCTTTTTCTTTTTTTTTTTTTTTTGACACAGAGTTTCGCTCTTGTTACCCAGGCTG
GAGTGCAATGGTGCGATCTCGGCTCACTGCAACCTCCGCCTTTGGGTTCAGGCGATTCTCCTGCCTCAGCCTCCCAAGTA
GCTGGGATTACAGGCACGCGCCACCATGCCCAGCTAATTTTTTGTATTTTTAGTAGAGACGGGGTTTCACCATGTTGATC
AGGATGGTCTGGATCTCTTGACCTCGTGATCCACCCGCCTCTGCCTCCCAAAGTGCTGGGATTACAGGCGCGAGCCACCG
CGCCCGGCATAACAGCCCCTTCTTGAACTCCTAACCTCAGGTGATCCACCGCCTTGGCCTCCAGAGTGCTTGGATTACAG
GCGTGAGCCACCATGCCCAGCCTGACAGCC--------------------------------------------------
--------------------------------------------------------------------------------
--------------------------------------------------------------------------------
--------------------------------------------------------------------------------
--------------------------------------------------------------------------------
--------------------------------------------------------------------------------
--------------------------------------------------------------------------------
--------------------------------------------------------------------------------
--------------------------------------------------------------------------------
--------------------------------------------------------------------------------
--------------------------------------------------------------------------------
--------------------------------------------------------------------------------
--------------------------------------------------------------------------------
--------------------------------------------------------------------------------
--------------------------------------------------------------------------------
--------------------------------------------------------------------------------
--------------------------------------------------------------------------------
--------------------------------------------------------------------------------
--------------------------------------------------------------------------------
-------------------------------------------------------------CCTTCTTGCCTGGGGACGA
GACCAAGAAACTAGCCATAAGATTAGAAACCATGGTTTAGGAGTCATGCCGCTGGAGGCTATAAGATTTTGAGCCTCCCT
AATCTGCTCTCAAGGTCATTGCTTAAGATATTTTGTAAACCCTGCCCTTGATGGATCAGCTGGCACCACTCTAGAAGGGT
GTAAGCTGAAGACTGAAAAACTGGCTTATCTGATTTTGGGACCCTCATCCAGGAGCTGACTTAGCACAAGAAGACAGCCA
TCATTGTAAACTGATGGAGACTAAAACAAAGTATTGCCACGTGGTTATAGGTCACGTTTCTGAGGACAAGAAACAAGATG
GAGGCCTGTAGCCAAGTTTGTTACTGACCATTTTGTTGGGCTGGCTCCAGCAACAGGCTTATGAGGTCCTGGGCCTGATG
CTATCATAAGATACCCTTTCTTTGACAGAACCGTACAGAAAGACATGCAAAGCACATCAGATGGCCTACAGCCCAGGACC
AACCTTACAAGTTCTTTTTCATTAATTGTAACTTTACAGAAAATATAAACAACAATTCTTATTATCCCTTTTACTGGTTT
GCACAGGGAGAGAGAAGACAAAGACCTGACTAGAAAGAAAGTTTTACCCTTTTGCCGGCATATCAGGCTCTGGGTTCCTT
CCCCTTAGCTCAACTCTAAGCCAAGCATTTTAAA-TTGGAAAACTAACTTTTCCAAGTTTGGAATAACATTATTTAAAAA
GCCATTTTATACTGTGAAAGAAGGAAATACACCATACAAAGGAGTTCTGATTAGCGTTGTCAAGA--CACTGTGTTTCTT
CCTGTTG-AAATGGTGTTTCCCCTCTTGATTTCCCTTTCTTATTTCCTCCTCTCCCTTCTGGCCTACTATGAAACATGTT
GCTTATCTCTAAAATTCTTTTCTTTTTGTAGAGCTGCCTGTTTTAGCTGTAGTTAGGGTTGGGCTTAGGAGCAGCATAAC
ATTCCTCCATGAGAGGTCAAATACCTGAGTTAAAATTTTGGAAAGCTTCTAAATACCTATCAGCGTCATCAG-AAAACTG
GCCTATATCTTGCTTTACTTGCCTAAAGTCCTGCAACGAGAAAGGAAGTTGAAGAGGCCCCAGGTCAGACAGAGTTTCAG
ACGGTTTCCCCGAAAATGACTTTTTTAATTTGGGGGAACTATTTTCCTTGGGCCTATTCGATATGATTTCTAAAAAAGCT
GTGTTGATTTTACAATGCTTGAAAAGGCTTGGTAAAAACACCACACCCT-GTGAAAAGAAAATGAGTTGCTTTCTTTAAA
GTTCTGAGGCTAAGGAAGTTCCAGTGTTTCAGAGTATACTCCAGAAGGATGCAAGCGGAAGTTAGCTTATTACCCATTTA
GAAAAAGAAACAAGAATAAAAGTATCCTGTTAGTCTCCTTCCTTTCCGTATGACCCAGAGTGGAGGAGAGGACAGGGAGC
ATCCTTCGAATGCTTCCCCTCCCAGGTTTCTGGATCCCAGCACTATGTTAAATGTGCCCTCCATGGTTATAGGTGTGGTC
CTCCAAGCCATGGAACCAAATGAACTAAGTGATGGGGCTAACCATGCTTATCCACGCAGACTTAGTTTATCCACTTTGCG
TGATTTCCCTCTGACTTGCTAGAACCCGTGTAATTTGCCTGGCTCCCTAAAAAACAGATGTCTGGAGAGACTGTCACCTT
TGGGCAAGGATCCTTTAACAGAGGCAATGTGCTAGATTGCTTAATATTACAGCTGATGTTAACGCACTTACCCTTAAAAA
A--AAGTTCTGGTTAACTTCCAAACTTAAAATTCCCTTACTAATTGAGTACTATCTTAATATGAGACCAAATATGTGCCT
TAAAAGAACATAGAAACGAATAGCCATTTTCCTACTGATAGGACAATATCGGAACTAAAATCTGGCTGCAGAAGACATTT
TACTCCTAACTGTTAAGTACAGAAACTTCCCATTCCCAGAAGAGGCCTACCACTTGATTTCTAACAGTGTAAAAGGAAGC
TGCTGTGTTATGGTGGAAAAAGAGGAAAAAGGTGTGCCTCATGTAGAGGATTTTTATTGCCATTAAGTGATGCTGTTGGC
TTAGAAATATTATGTGCTTGCCCCCGGTGTGGTAGTTAAGTAACCTCACCAAAGGAGGAAGGGGAAAACT--GTTCCTAG
AGGCATTTTCCTGATCTTGCCCAGCAGGATTACTTTCCTAGGCTGTAAAAATCCCCGCACATTTCACACACAGAAAGAAT
AAGAGGTCACAGATAGAGAAGGAAGAATAGTTTTGCAACAGAATAGTTGAGGATTTTCTGCCAACACTCAGAGTGGGCTG
TCGGAGGCTGCGTGTGGTCCAGGGGCCTTTGATTCATGTCAGGGTGTGCCCTGGCCAGAAACTCTCAGTTACCTCAGAAC
TTTTCCCAGCCTCGCTTGATGGCGAGGTCTCCCCATGAAAAGAAGCTAGTTCAAAATGGCCAACATTTCCAGTACCCATG
GGTATTGGGGGGTTCTCCATGTTCCCCTCAGCAAGCCTCACATCTGAGTTTTTAGTATGGCAGCCAAAGCTAAGCGTATG
TACCAGGCTGACAGATGCCCATTGATTTATCTGGTTTCATTTTAATGTAGAGGCCAAGAGTGCCTTAGACTAATAGAACA
GATTTAAA-CTTGCTCCCATACTT--------------------------------------------------------
--------------------------------------------------------------------------------
--------------------------------------------------------------------------------
--------------------------------------------------------------------------------
--------------------------------------------------------------------------------
--------------------------------------------------------------------------------
--------------------------------------------------------------------------------
--------------------------------------------------------------------------------
--------------------------------------------------------------------------------
--------------------------------------------------------------------------------
--------------------------------------------------------------------------------
--------------------------------------------------------------------------------
--------------------------------------------------------------------------------
------------------------------------------------------ACCAGGCAGATAATAATTGTGTTCCC
ATCTCAACCTCCCTGACTGCTCTGCAGCCTTTGGGTCACTGCTTAGGTAGTGGTGGGGTTAGCCCCATGTGTGGAAACTC
TGGCTCCTCTGCACATACCTCTTTCTGTGTCTGTTATGGCATCAGTTATTTTCACACTGGCCACTTGTAATCTCACATTA
AACATAAATTTTACAAGCTCATGACAGACGGCTATCTCTATT---CCCCCCTCCCATAGGCTCTT-ATGCATCTCAGCGC
TGACGCAATTTTTAATAGATTAAAAGGTAAATGGATTCCTCACTCTCAGGTTTGGATTACAACTCGAGTCATAAACAAGG
CTAGACATTATTGTATGATGCAAATCTCTGATCTTGCCATTTATCAGAGCCTGATATTGGCCAAAGCCACTGCAGCATAA
CACTATAAGTCCTTGGCCCATTTTCAGTATCCA-TAGCATCGGATGAATTGCTCCTCCACTCCACCTTCATGCAGCCTTG
TTCTTTATGGCCTTCGTAGATTATGGGAGAAGTGGACAGTTTTTATAGGTCTGAATTTATCTTCATACAGCCTTTATAAC
ATTTTCCTTCCTTTTTCAGAGCAAGGCAGAGACTCATCAGCTGTCTCATAGCAGAGATCTTTCTTTTACCATGAAACTTA
GACAGCCAGCAACACATCAGTATTTATTAGGGTCTTCTCTTTCCTTGTTTTTAGCCTTACAGCTCCATTTACCCAGAATT
CCTTACAGTCGAGGAACATAGACTGAGGCCACAGGGTCCTTACTGAAACCAGGTCTGTCAGTCAACAACTCTGAGCCATC
ACTCTGTGATACTTCCCTGACTGAACACCAGCAGCAGTTTCCAATCCGGTTTGCCATTTCTCTTATGGGAGGTAACAGCC
CTAGCCTAGCCAGGCTCATGTAGTTCGGCCAGGGGGATGCAGGACAGGAGAACCATGTGGCACAGCTTCCCCAGGGGAGT
TCTCAGTGAGAGTCCCTAGGGTAGTACAGGAGGCATTATTATCTCCATCATCGGAGTTTTTTGAGAAATGAGACTGGCTG
GATGTGTGTGAAA-TGCTGTAGGTTAGATAAGCCTAGTGCCCCAAAGGACTCATTATCTTGTGTAAGCTCATGGGAACAG
TTCTCAGAAACCTAAAA--GAAACATATCTGGTTTTGTGGTGGAAAATGAG-----------------------------
--------------------------------------------------------------------------------
--------------------------------------------------------------------------------
--------------------------------------------------------------------------------
--------------------------------------------------------------------------------
--------------------------------------------------------------------------------
--------------------------------------------------------------------------------
--------------------------------------------------------------------------------
--------------------------------------------------------------------------------
--------------------------------------------------------------------------------
--------------------------------------------------------------------------------
--------------------------------------------------------------------------------
--------------------------------------------------------------------------------
--------------------------------------------------------------------------------
--------------------------------------------------------------------------------
--------------------------------------------------------------------------------
--------------------------------------------------------------------------------
--------------------------------------------------------------------------------
--------------------------------------------------------------------------------
--------------------------------------------------------------------------------
--------------------------------------------------------------------------------
--------------------------------------------------------------------------------
--------------------------------------------------------------------------------
--------------------------------------------------------------------------------
--------------------------------------------------------------------------------
--------------------------------------------------------------------------------
--------------------------------------------------------------------------------
--------------------------------------------------------------------------------
--------------------------------------------------------------------------------
--------------------------------------------------------------------------------
--------------------------------------------------------------------------------
--------------------------------------------------------------------------------
--------------------------------------------------------------------------------
--------------------------------------------------------------------------------
--------------------------------------------------------------------------------
--------------------------------------------------------------------------------
--------------------------------------------------------------------------------
--------------------------------------------------------------------------------
----------------GCTGTTATCTTCGTTTGTCATTGATTAACCAGTAGTGTAGCAAAAAGGCTACTGGAAGAGGACC
CTGAATACAGGGTCATCTCAGGTCACCGTATTGAAGATAAATAATTTTTGTAAATCACTTCCTATACCTATTTATACATT
TGATGAAACACCATCATTCACTCTGTGCTGATAATAAGGGCAATCATTGCAAATGCACAGTGACTAGTGAGATTTGATAT
ACTGCTCATAAGGTGGTGAGAGCAGGTATTTTTGATCATATAACCTGTAAGGAGATAATTTAATAAAATCATACTAACAT
CAGGGAAACATTTTATGCTGAGAGAAGAGCAAATGTGAATGCCCTGAGGCATAGGTGGTTTGGTGATTTTAATATTGAGG
ATGTGTTTTGGCATGAAAAAGAAAAGCCAGGAGAGATTATGGGTCACACAAAGATCTGGGTAGAAAAGACCTCAGTTTGT
TTTCTATTCATTGAAAGTAAAGAAAAATGATAACCAATGCACAGATAAGAGCAGAATTTGTCATATGACATGAACTGAGA
GTAAAGTATTTAAGGCAATTATTAAAAGCCCATATTACCAGGTAACCAAATACCATTTCTTATTTTCTCTCCTTTTTTT-
----CCCTTAAATATTTTCATTTTGCCCATTTTCTAATTGTACACAATCAATATCCTTTCTATTTAGTCTG--TTTCTTA
CTTAGTCACATTTTAACCTTCCCAATCATGCAGGGATCTGTGAGCAAGAGGAACCTCAGCTGCCAGGACAGGCAAGAGCA
GTGGAGCAGCTACCATGGCTTCCAGAATCCTGGGGAGTATAAAGGAGGAGGTGACCTGCCCCATCTGCCTGGAACTCCTG
ACAGAACCTCTGAGCCTAGACTGTGGCCACAGCTTCTGCCAAGCATGCATCACTGCAAATCACAAAGAGTCTATGTTACA
CCAAG---GAGAGAGAAGCTGCCCTTTGTGCCGGCTCCCTTACCAGTCTGAGAACCTGCGGCCTAATCGGCATTTGGCCA
GCATCGTGGAGAGGCTCAGGGAGGTCATGCTGAGACCAGAGGAAAGGCAGAACGTTGATCACTGTGCACGCCATGGAGAG
AAACTTCTACTCTTCTGTGAGCAGGATGGAAATATCATTTGCTGGCTTTGTGAGCGGTCTCAAGAACACCGTGGTCACAA
CACATTCCTCGTGGAGGAGGTTGCACAGAAATACCGAGTAAGAGACTGGGATGGAGGGAGGAGAGGGCAGAAAAT-TGAT
CTGATGGAAAATTTTCACTTTGCATTTAACTTTAATTGCCTTGTCTTCATAGGCCTGAGGCCTGGGATTTTTTTTTTTTT
TTTTTTTTTTTTTTTTCATCCTATGCTTAACTTCTGAGGCTTGAAGGACAGTTTTTTT----------GCATTCCACCCA
ATTACAAGAGAAAAATCCAAGAGTATGTCTTTCTGGCCAGAAATAAATATTTTGTACCTTGGGTTAGATGGGTAGAGAGT
TGGTGTCCAAGAAAAGCTCTTATTACCCCTTTCAGCAGGAGAGTGGCTGGAGTGGGATGAGATATAAGTTCTTCTCTTGC
TGCAGGATCAGTTTTTTCTTCTAGGACAAAAAGAATCAGTTTACTCCTGTTGACAAGATGGGGAGGTCTTTTACCTGAGA
TGTAGGGAGCACATTCACCAATGTAAGTTTTCTTCCAAGTCATGGGTTCTCATTGTCTTTCTCACTGTTTCTGTAAATTT
GTTTCTTCTGAGATCAACCTGATTTCTTTCATGTTTATACTCTATCCA----GGTGCCGGCAAAGCGCATAGCTTGACTG
TGGTGTGATTCCTTTCTCACAGGAAAAGCTCCAGGTAGCTCTGGAGACAATGAGGCAGAAGCAGCAGGATGCTGAAAAGT
TGGAAGCTGACGTCAGACAAGAGCAAGCTTCCTGGAAGGTAACATGACATGGTTCCTGAGGGAGTTAGCCAGAAATCTGG
GCAGAACTGTGGGAAGGAGCTTTCTTCCTCTTTATTCCCTGATGCTTGTTAAGTCCAGAAGTCATCTGATTTGTCCTCTT
TATCCTTTCCCTGATGGAGTATGGTGGCTAGGGAGTGAATTTGTCACAGTGAGCACAGATATCTATAGGGAGCTATTTAC
ATGAAGGTTCTCTCTGGTGAAGACAGTGAGTGAATCCTGCATTCCATTTTTGTGTTACTTTTTGAGTCTGTGACTCTACT
TGGGGAAGACATTTGGCAGTGGCTCATGGTTCTGTCCTCAGTGTTCAACTTTTGGCAGGGAGTTTGAGTTTGAGCTGAG-
-AAGTAATACAGGCACGCGTCAGTGTCCTGGATAGCTGTGTGAAAGCTAAGCTACATCCAGGTAACCCATTTTGACTCAG
GTTGAACCT---CAATATACCCATTCAAGATCATTGTTTTAAAATGTCATGAAGGAAAAAAAA---TAGTAAAAATTAAC
TTTTCTAAGACCTACTCTCCTGCTTCTATGTCCCCTCCTTGTGAGAACTCCCCAAAAGAAACAGTTATTTTTCTGACTAT
CAGCCTCTGCCTGGTAAACTAAGTGCCTCTTTCTCCCTTCTCATCTCTGAAGATTCAAATACAAAATGACAAAACCAACA
TCATGGCAGAGTTTAAGCAACTGAGAGACATCCTGGACTGTGAGGAGAGCAATGAGCTGCAAAACCTGGAGAAGGAGGAG
AAAAACATTCTGAAAAGACTTGTACAGTCTGAAAATGACATGGTGCTGCAGACCCAGTCCGTGAGAGTGCTCATCTCAGA
TCTGGAGCGTCGCCTGCAGGGGTCAGTGGTGGAGCTGTTACAGGTAAGAAGTGGAAAGAAGCCTGAGCACTGAGATTAAG
AAAAAGTGAAGGCTGTTTCCTTTTCTGTGTTACTGTGCTCTTTCTAATATTAACAACATTCCCTGCAGGACTGCTTTTTT
GAAT------------------------------CAATTGCTGAAGTTACAGGAATAACTGAATGTAGAAGTGACAAGAG
ATAATCCAATTTTTATTAATTTATCC-AGAGCAGTACAAAAATTTGGCATAGCAGAGATGATCAATTAGCTCTAGTGATG
TTTGATATGTTCCTGTTCTCTGTATTCCAGTGTCATGCACTTATCAATGCAGCTTTTCATTGCTCAGCTTAGCCACAGGC
AAACAAGTGCACGTCAAAATACAAGATGC--TTTTTATTTTTTCCCTTCATGGAATGAATTGAGAATTTTTTCCTTTTTT
TT--ATTTG-CTGAAAAAAA-T-AAATAACT-CTATTATTTCTTCTTTATATACACAATAGAATTCAATAGCAAA-----
--------------------------------------------------------------------------------
--------------------------------------------------------------------------------
--------------------------------------------------------------------------------
--------------------------------------------------------------------------------
--------------------------------------------------------------------------------
--------------------------------------------------------------------------------
--------------------------------------------------------------------------------
------------------------------------------------ACCATTGTAGTCTGCTGTTCGTTTTGAAAAGG
TATAAATTTTTTTTT-ACGTGTACTGGATTTATTTAGATTCTTTACATTTTTTGAATATGTTCTTGGTAATGTATATCTC
TATAAGAATTTGTCCATTTCATCTAAGTGGTCAAATTTGTAAGTCCAAAGTTGGTCCTAAGAATTATTTATAACTCCCCT
ATTTTTTGTCATTTTTTT--------GTCTTTATTTAAATTGATAAATGAAAGTTTTAAGTATTCATTATGTAAAGCGTG
CAGTTTATATATATATATATTTATTTATATATATATAGTGGAATGGCTAAATGGAGCTAATTACCACGTGAATTACCTCA
CATGCTTATCATTTTCTTGTAAAATAGAACATTTAAAACCTACTCTCTTCCCAATTTTCAAGAATACAATACAAGGCTGG
GTGCGGTGGCTCAAGCTTGTAATCCCAGCACTTTGGGAGGCCGGGGCGGGTGGATCACGAGGTCAAGAGATCGAGACCAT
CCTGGTCAACATGGTGAAACCCCGTCTCTACTAAAAATACAAAAAAATTCGCTGGGCATGGTGGCACGTGCCTGTAATCC
CAGCTACTCAGGAGGCTGAGGCAGAAGAATTGCCTGAACCCAGGAGGCGGAGGTTGCGGTGAGCCGAGATCACGCTATTG
CACTCCAGCCTGGACAAGAAGAGTGAAACTCGGTCTCAAAAAAAAAAAAAAAAAAGAATACATTGTTAAGTATAATTGCC
ACATTGTGCAATAGATTTCTTGAAGATAGTCTTGTTTTTATTCTGAAGTTGGTATCCTTTTACCAATATCTGCCTCAATT
CTCCCTGCTTCCCAGCTCCTGGAAACTCCTCTTACACTCGCTAATTTTTCACATCTACATACTAAGTGATATTATACAGT
ATTTGTTTTTCTGTTCCTGGTTTGTTTTACTAAAAGTCTTCCAGGTTTATCTATGTTTTATGACAACAGAATTACTCTCT
TTTTTAAGGCAGAATACTATTGCATTGTGGATACATATGTGTGTATGTGTGTGTATATACATATATATATACATATAGCA
CATATATACTGTGTGTGTGTGTATATATACATATATATACTCACATTCAATCGTTGATGGATACAGACTGATTCCATTTC
TTGGCTATTGTGAATAATGCTGCAATTAACATAGATGTGTAGATATCTCTTGGAAATGTTTATTTCATATCTTTTGGATA
TGTATTCAGTCATAGGACTGCTGAATCATATAGTAGTTCTATTTTTAATTTTTTGAGGAGCCTCTATACTATTTTTCACA
CGGGCTGTAATAATTTTCTTTTCTTTCTTTCTTTTTTTCTTTTTTTTTTTTTTTTTTGAGGCGGAGTTTTGCTCTCGTTA
CCCAGGCTGGAGTGCAATGGCGCGATCTCGGCTCACCGCGACCTCCGCCTCCTGGGTTCAGGCAATTCTCCTGCCTCAGC
CTCCTGAGTAGCTGGGATTAACAGGCACACGCCACCATGCCCAGCTGATTTTTTGTTTTTTTAGTAAGACGGGGTTTCAC
CATGTCGACCAGGATGGTCTCTAACTCTCGACCTCGTGATCCACCCGCCTCGGCCTCCCAAAGTGCTGGGATTACAGGCT
TGAGCCACCGCGCCCGGCGCCTTTTTTTTTTTTTTTTTAATAGATGGGGTTTCACCATGATGGCCAGGCTGGTCTTGAAC
TCCTGACCTCAGGTGATCCACCCACCTCGGCCTCCCAAAGTGCTAGGATTACAGGCGTGAGCCACCGTGCCCGTGGCCTG
TAATAATTTTCATTCCTGCCAGCTGTGTGCAAGGGATCACTTTTTTTCCCATCATCTCCAACATATGTTCTTTTGTCTTT
TTTATAATAGTCATTCTAAACAATGTGAGGTCATATCTCATTGTGGTTTTGATTTACATTTCTTTTATGATTAGGGATAT
TCTGCATTTTTTTTTTTTTTGAGATAGAGTTTCGCTCTTGTTACCCAGGCTGTAGTGCAATGGCACGATCTCGGCTCACC
GCAACCTCCGCCTCCTGGGTTCAAGCAATTCTCCTGCCTCAGCCTCCTGAGTAGCTGGGACTACAGGCACGCGCCACCAT
GCCCAGCTAATTTTTTGTATTTTTAGTAGAGACGGGGTTTCACCACATTGACCAGGATGGTCTCGATCTCTCGACCTCGT
GATCCACCCGCCTCAGCCTCCCAAAGTGCTGGGATTACAGGCTTGAGCCACCGCGCCCGGCTTATTCTGCATTTTTTTTA
TATACCTGTTGGCCATTTGTATGTCTTCTCTGAGAAATTTCTATTCAGTCTTTTTGCACATTTTTTGCTTGGGATATTTG
TTTATCTGCTTTTGAGTTATATAAGTTCTTTATATATAAGGAATATTAACTCTCATCAAATATATGGTTCACAAATATTT
TCCTCTGACCCACAGGCTACCTTTTAATTTTGTTGATTATTTCTTTGTAGTACAGAAAATTTCAGTACGATGTAATCCCT
TTTGTCTATGTTCAGTTTTGTTGCCTGGATTTTGGGGTTTATAGCTAAAACAATCATTGGCCTGAATAATGTTTGCAGCT
TTTCTCCTATGTCTTCTTCTAGTAGTTTTACTGTTTCAAGCCTTATATTTAAGTATTTAAGCCACTTTGAGATGATTTTT
GTAACATCTCAAAGTGTGAGATAGAATATAATTT-TAGTCTCCTGCATATGGCTATCCAATTGCTCCAACACAATATATT
AAGGAGA-------CTGTCCTTTCCTCAACAAGTGTTGATACCAC-GTCAAAAACTAATTAACCCTAATGGCATGCTTTT
TTTTCTAGCTTACTATACTGTTCCATCGGTCTACACGTCTGTTTCTAATGCTAGCACTATACTGTTTGGATAACTGTAGC
TT-GTAATATA---AGAAGTCAGGTGGTATGTTGCTTCCAGCATTGTTCTTTTTGTTCACGATTTTTCTGGTGATTTAAG
GTCTTTTCTGGCCCCACACAAACTTGAGGGTTGTTT--------------CATCTATTTTTGTAAGAAATGTCAGAATTT
TAATAAGAATTGCATGGAATCTATAGATTACTTTGGGTAGCATGTACATTTAAGGATATTACAATGAGACTACAACCATA
TTACAATTCATCATTACAGCAGCCCTAGAGCAGGCTTATAAGAGGTCTTAAAGGGAGTGCTGAACATGGAATAGAAAGAA
CAACAACTGATAC----------CACTGAAACCCACTAAAGCACATACCATACAGACAATGTAAAACAACTACACAATCA
AGTCTACCGAGTAGACAACTAACAGCAGAATGTCACATATCAATACTAATCCAGAATGTAAATGAGCTCAATGCCCTACT
TAAAAGAGATAAAGTGGCAAAAGGAATAAAAAGACAAGACTCAA--CTGTCTGCTGTCTTCAAGAGACCCATCTCACATT
TAATGACACC-------AGGCTCAAAGTAAGGGGTTGGAGAAAGACTTAATGGAAATAGAAAACAAAAAGGAGCAGAAGT
AGCTATTCTTATATT-GATAAAATGTACTTT--AAACCAACGACAATTAAGAACAAAAAAGAGAAAACATGATAAAGGGT
ATAATTCAACAAGAAGACTTAACCATCTTAAATATATATGCACCATAGGTGAGAGCACCCAGATTAACAAAACAAGCTCT
TCCTGACCTGAGAAACAACTAAGATGACCTCATAATAATACTGGGAGACAT-AACATTTAACCGAAAGCATTAGACAGAT
CATCAAGGGAGAAAACTAACAAAGAAACTCTGGACTTAAACATGTTGACTGACCAATTGGATCTAATTGACATCTGTAGA
CTACTTCACCAAACAACCACAGGAAATACATTTTTCT-----GGACCAGAACATATTCTATGATCAACCACATATTTGGT
CATAAAGGAAGTCTCAATATATTTTTTAAAAAA-----------------------------------------------
--------------------------------------------------------------------------------
--------------------------------------------------------------------------------
--------------------------------------------------------------------------------
--------------------------------------------------CTGAAATCATAACCAAGTATACTCACAAAC
CACAGTGCAATAAAAAATAGAAGTCAATATCAAGAAGACCTCTCAAAACTACACAAATACATAGAAGTTAAACAACTTGC
TCCTTAATAACTCCTGAGTGAACCTTAAAACTAAGGCAGGAATCAAATATAATATTTGAAAACAATAAAAATAAGAACAA
AACTTATAAAAATCTCTGGCATATAGCTAAAACAATGAAGAGGAAACTT-ATAGCATGAAGTACCTTCATTAAAAAGTTA
GGAAGGTTTCAAATTAATAATCTAACTTTACACCTGGAAGAATAAGAAAGAAAAGAAAAAACTATTCCTCTAAGCTAGCA
GCAGAAAATACATAACTAAAATTGGAGAAGAACTGAATGAAATTGAGACACAAAAACCCATACAAAAGGTTAATGAAGTT
AACAGTTGGTTCTTCAAAAGAATAAACAAGATTGATAGACTTCTAGCTAGATTAATAAAGAAAGAAAAAAAA-TATTCAT
GTAACTGCAATCAGAAATGACAAAGATGACATGACATCTTAGCCTGCAAAAAAAGATACTCAGAGACTGTTACTGACAAC
TCTGTGAAAACAAGTTAGAAAATCTAGGGAAAATGGATAAACTCCCAGAAACACAAAATTTTTCAAGATTGAATCAGGAG
GAAATTGAACCCCGAACAAACCAATATCAATTTCCAGAATTGAATCAATAATAACAAACCTATGAACCAAAAAAA-GACA
TCAACCAAATGGATTCACAACTGAATTCTACTACATATTTAAAAAAATATATTACCAATATTACCGAAAGTATTTCAAAA
AATGGACGAGTAGGGTCTCCTCTCTAACTAATTCTATGGAG----CATCAATCCAATACCAAAACCCAGCAGAGGCACAG
TGAAAGAGAAAAATCTCAAGCCAGTATTCTGATGAACATAAATGGAATAGTCCTTCACGAAATACTAGCAAACTCAATCA
AA-CAGTGCAGCAAAAGTTAAATAGACCTTTTCCTGGCATGCGAGGCTGGTCTGACATACACAAATCAGTAAGTGTGATC
CACAACATAAATAGAATTAAAAGCAAAAGCCATATTATTATTTCAATAGGTGCAGAAATGCTTTCAATAAAATCCAACAG
CCCTTCATGATAAAAGTCCTAAACAGACCAGGCATCAAAGGAACATACCTCAAAATAATAAGAGCCATCTATGACAAACT
CATAGCTAAAATCATATCGAGTGGGCGAAACCTGGAAACATTCCCCTTGAGACATAGATCAAGACAAGGATATGCACTCT
GCCACTCCTATTCAA-----TACTGTAAGTCCTAGTCAAAGAAATTATGTAAGCGAAAGAAGTTAA-GACATCCAAATTG
AAAAAAAGAAAGCAGTCAAACCATATCTCTTTTCTGGCAATATGATTTTATACAAAAA--TGTATATA--TTTCAATCCA
TGAACACAATTTTTTTTTCATTTTATCCTTGTCTTTTTAAATTTCTTTCATCAATATTTTATAGTGTTCAATGTACAGAT
CTTCCAACTCCTTGGTTAAATTTATTCCTATTTAACTTTGTACCTATTATATATGGGGTATTTTTCTTGATTTCTCATGA
AAAAAAATTGTTAGTGTATACAAATTCTTTATTTTACATCCTGCAACTCTGTGAACTTATTAGTTCTAAGAGGTTTTTTT
TGTAGTCTTAAAGATTTCAATGGTGAAATCACATTAAGTGCAAACCGTGGCAATTTAACTTCTTTTCCAGTTTGAATGTG
TTTTATTTCTGTCACATGTGTGTTTGCTCTGGCAAGAACTTCCAGTACTTGGTCAAATAGGAGTAGTAAGTATGGGCATT
-CTTATGTTTTTCCAGAGCTTAGAAGAAATGCTCGTACCTTCTTTTGAGTGCATTTTGATGTTATATTTTATGTTATGTT
ATGTTATGTTATGTTATGTTATGTTATGTTATGTTATGAGGCTATGATGTTAGTATGATGTTAGCTGTGGGTTTGTCATC
AATGGCCTTCATTATGTTGTGTTAATTTCCTTGTATAGCCAATTTTCTGAGAGTTTTTTTTTTATCATAAAAA-ATATTT
AACATTGTCAAATGCGTTTTCTGCATGAATTGAGATGATCATATGGTTTTTGTCCATTATCCTCTTAAAGTATTTTAACA
CTTATATACGTTTGCCTATGTTGAACCCTCCTGTGCTCCTGAAACAAATCTCACTTTGTCATAGTGAATGATTCTTTTAA
TGTGATGTTCAACCTGAGTTACTAGTATTTTGTTGTTTACTTTCCATCTATGTTCTTCAGGTATATTGACTGACATTTAT
TTTTT-CTTTAGTGTTCTTGTGTGGACTTGTCATCCTGGATTCATAAAATTAGTACAAATATTCCCTCT--GTCAATTTC
TTAGAATAGTTTGAGAAGGATTTTGGTTTATTTTTCTTTAAATGTTTGGTAGAATTCAGCCATGAAGCTAT--CATGTCC
TGAGCTTTTATCTGATGAATTA----CTTTTTATTACTGATCCACTCTTCTTACTCATTGTTGGTCAGCTTGTATTTTCT
GTTTCTTGGGGATATAGCCTTGGTAGGTTTAACGTGTCTAAGAATCTATCTCTTTCTTCTGTGTCATCTAGTATACTGGT
ATAAAATTTTATA-------------------------------------------------------------------
--------------------------------------------------------------------------------
--------------------------------------------------------------------------------
--------------------------------------------------------------------------------
--------------------------------------------------------------------------------
----------------CCAATATATTAGATATATACTGAGTTTAGACTACCAATA-GTAGTCTCTTATGATCTTTTGTGT
ATCAGTTGTAATGTCTTCCCTTTCATTTCTGGTTTTATTTATTTGAATCTTATCCCTTTTATTTTTAGTCTAGCTAAAGG
TTTGTTGATTTTATTTATCTTTTCAAAAAACAAATCTTAGTTTTATTGATCTCTTCATTGGTTTTTCTAGTCGATTTCAT
TTGTCTGCTTGATTTTTATTATTTCCCTCCCTTGGGTAACATTAGCCTTAGTTTCTTC---ATCTAGGTCCCTGAAGTGT
AGTGTTAGGTTGTTTATTGGAGATTTTTTCTTTCTTTTTTCATGTAAAACCACTTTTGCAAAAATTATATGAATGAGGAA
ATTATGACAGTGAAGGTGATATGATCTAACAAACCCATATTCCCTTTATAGCCTCCAAACTGCTCTTAGGCAATTAACTT
GAGGAGAAATTTAGTTTATTGTTTAAATGATATTAGCCCTTCCCCTAAACTAAACCACCTTTGTAAGGCTAATGAAAGAC
CACCAAGTTAGGAGAATAAAAGGAGACAATTCAGACCAGTGATTATTTCAGATGTCCTAAGATTTGCAGCCTCCTCAGTT
ACTCCAATAGATAACATCACTATTATAGAACCTACAATTAGCTTTTTGAGATGTAATTTCAGGTTTTTGCATTTCTGATG
ATGAATGGCTCCACCTGGATCCACCAAGTGGCCTCATGTCCTTACCCCACAGTAGAGTCAGTAGAGTCAGTCAAAGAGCA
TTTTCCCCACCCCTATGGTTATACCCTTGGCCAGTCAGCACTCCCCGTTCTCTGGTCCTCAGCCTGTCAAACTATCCTTG
AAACACCTTAGCCTCCAAATTTCAAGGAGGCTGATTTGAGTAATAATGAAACTCCAGTCTCCCATTCAACTGGCTATGTG
TGAATTAAACTCTATTTCTATTGCAATTTTCTTGTCCTGACACATTGGTTCTATC--------GGACAAATGAACTCTTG
GGTTTTTACACATGTGGACATTTATTGCCATAAAATTCCTTCTTAGACTTGCTTAGGCAACAGCCCATAAGTTTTGGT-T
GTTGTATTTCTATTTTCATATGACTCATGATATTTAAATGCTCTTAA---------------------------------
--------------------------------------------------------------------------------
--------------------------------------------------------------------------------
--------------------------------------------------------------------------------
--------------------------------------------------------------------------------
--------------------------------------------------------------------------------
--------------------------------------------------------------------------------
--------------------------------------------------------------------------------
--------------------------------------------------------------------------------
--------------------------------------------------------------------------------
--------------------------------------------------------------------------------
--------------------------------------------------------------------------------
--------------------------------------------------------------------------------
--------------------------------------------------------------------------------
--------------------------------------------------------------------------------
--------------------------------------------------------------------------------
--------------------------------------------------------------------------------
--------------------------------------------------------------------------------
--------------------------------------------------------------------------------
--------------------------------------------------------------------------------
--------------------------------------------------------------------------------
--------------------------------------------------------------------------------
--------------------------------------------------------------------------------
--------------------------------------------------------------------------------
--------------------------------------------------------------------------------
--------------------------------------------------------------------------------
--------------------------------------------------------------------------------
--------------------------------------------------------------------------------
--------------------------------------------------------------------------------
--------------------------------------------------------------------------------
--------------------GGTGGGCATCTGATCCAACATAGACAGATGCTATGCAAGCC-TAAAAGTGTTTTATGTTA
AAACTTAGAAGAGAAGTTCTCCTTTCTGCTGGGGCTTATATCAGGAGATTTACATTTCCTTCATGTACAGAGAATAAACT
CAATGCAGAAGAATAAGTAGAATTTGGAGAAGGACATTGATCACATTTTTGTTTTTTGTTTTCAGATGGAGTCTCGCTCT
GTTGCCCAGGCTGAAGTGCAGTGGCATGATTTTGGCTCACTGAAACCTCCACCTCCTGGGTTCAAACAATTCTTGTGCCT
CAGCCTCCCGCGTAGCTGGGATT--ATAGGCGTGCATATTTTTGGAAGAGACAGGG------------------------
--------------------------------------------------------------------------------
--------------------------------------------------------------------------------
--------------------------------------------------------------------------------
--------------------------------------------------------------------------------
--------------------------------------------------------------------------------
--------------------------------------------------------------------------------
--------------------------------------------------------------------------------
--------------------------------------------------------------------------------
--------------------------------------------------------------------------------
------------TTATACCAGATTGGCCAGGCTGGTCTTGAACTCCTGACCTCAAGTGATCTGCTCACCTTAGCCTCCGA
AAGTGCTGGGAACATAGGCGTGAGTCACTGCTCCTGGCCCATAGACCAGATCTTGATGTGACAAGGTTTGAGCTTCAAAC
TTCAG-TATGACTGAAGTTGTAATTAACCTTTCGAAAATCCTTTTCACCACTTAATCCAGTTTTATTTGATTTATGTTAC
TTAATCCAGTTTTATTTGATTTATGTTACCTACAACATAAAAGTCCTCATAC-AAAAAACAAAACTATTTGATTGTATGT
GTAGATCCAGCCATTGGTCTTGTTCTTG-AAAAGAAATCTATGTGGAAAAATTATGTCTGGCATAAAGGAGACCAAAGAC
ATTGCATCGGTACATATCTGCTCAAACAAATAAACCAATATTTGTGGTGATGAAGAGGAACAGACGA-------------
--------------------CCTCAACCCATTAA----------------------------------------------
--------------------------------------------------------------------------------
--------------------------------------------------------------------------------
--------------------------------------------------------------------------------
-----------------------------------------------------GAATGTAGACTGAACTGTCCTGGTAGA
GGCTATAGAGTTCAGAGTAAATGTAGTTTTTAGGGCAATAACTGAGTAGATACTAGTAATATTATGAACAATGTGGTGTA
AGAGAGAAGACAGTATGGTTTGTGTTACATAATAAAAATTATTAGTTGTTGGTCCTTGTTGCTCCTTCACTACTGAATGT
ACTAAACTGTATTTAAGTGACAAATCTAAGTAAAAGTAGAGAATTGGAAA-TGAACTGCACATATGTGTGTGTCAAACTT
AAGGAAGTGAATGAAGTCAATTACCGTTCATGTCTAAAATGAAAAGTGAGCAACCTTAAGAAAAA---------------
--------------------------------------------------------------------------------
--------------------------------------------------------------------------------
--------------------------------------------------------------------------------
-------------------------CTTAGTCCAGGCGTGGTGGCTCACGCCTGTAATCCCAGCGCTTTGGGAGGCCAAG
ACGCGTGGATCGCTTGAGGTCAGGAGTTCAAGACCAGCGTGATCAA--TGTTGGTCTTCTACTTCTACTACAAA-TAT-A
AAAATTAGCTGGGCAT------TGTGGCGGGCACCTGTAATCCCAGCTACTTGGGAGGCTGAGGCAGGAGAATGGCTGGA
ACCCGGGAGGCAGAGGTTGCAGTCAGCTGAGATTGTGCCACTTCACTCCAGTCTGGGCAACAGAGTGAGACTCCATAAAA
AAAAAAAAAAA-----------GAAAAAGAA--AAAGAAAGAAAGAAAAGAAAAGAAAAGAA------------------
-----------ATACCTATACTTGTTTCATACACTTGTTTG-TTATACCCTCAGCAAAAGCCACATAAACTTCTTGAGCA
CTATTATTCATTCATCTTTGATTTTTCAAAAAGTG-------GCCTGGAGAACAAGTTTATTTATAT--GTTTTATTGTT
TATTTTTGTGTGTGTTTTTGTTTTGTTTT-----GTTTTAGAGATGGGGTCTTACTCTGTCACCCAGGGCGATGTGCAGT
AGTATGATCCTAGTTCAATGCAGCTTTGATCAAACTTCCGGGCTCAAGCAATTCTCCCACCTCAGCTTCCCAAGTAGCTG
AGACTAGAGGCTCATGTCACCATGCCTGGCTAATTT------GTTTTATTTTTTGTAGAGGTGGGGTCTTGCTGTGTTGC
CTAGGCTGTATGTCTGTTTAATAAATCAAAGAAGC---------------------------------------------
--------------------------------------------------------------------------------
--------------------------------------------------------------------------------
--------------------------------------------------------------------------------
--------------ACTAAGTATTTAAATAATTTCATGGAGAGCCATATATATTTGGAGACAAA--CAAATTGTCAGTCT
CTTCTTTTCCTTCTGAAAATGTCCTATC-----TGCAGACACCAGAAGCCTCTTCCACAAGGATGAAAACTGTTTCTACT
TTTAAGAAAACTGGAAAACCTCGCATGAGTCTTCTGGGATGATTGCC--TTAAGT-------------------------
--------------------------------------------------------------------------------
--------------------------------------------------------------------------------
--------------------------------------------------------------------------------
----------------------------------------CTT-----TGCTTTTTT-ATCTTTCACACTGGCACCATCT
CCATTCTCAGTACACTAGGGACTGGGAGAAATGTAACGAAGCTTTATAAGTGAGGAGAGACTATT-CTTTCTTAATTTAT
GTTTTCTCTCTTCTTCCTAGGATGTGGATGGTGTCATAAAAAGGTATGTGTGGGAGGACAGAGATAGT--CTTTTTCCGA
AGTGAGGAAAGATTTATAGCCATT--------------------------------------------------------
--------------------------------------------------------------------------------
--------------------------------------------------------------------------------
--------------------------------------------------------------------------------
------------------------CAAA-----TGGGTTCAGTTAGAATAAAACATCTCCCAAGGCAGAAAAATTTAG-T
TTTTTTAAATCAT--AAATTTCTGAAATTTCTGGTCATAAATCAGTATTTGAATGTTTGATAACTATTGTTCGTTTGTTG
TTGTTGTTAGTTTTTTTTTTTTTTTTTTTTTTTTTTTTGAGATGGAATCTTGTTCTGTCACCAGGATGGAGCGCAGTGGT
GCAATCTCAGCTCACTGCAACCTCCGCCTCCTGGAATCACGCGATTCACGTGCCTCAGCCTCCCAAGTAGCTGGGACTAC
AGGTGTATGCCATAACGCTTGGCTAATATTTTGTATTTT----------------------GTTGGCCA-GGCTGAT---
-ATCTCCTGACCTCGTGATCCACCCTCCTCAGCCTCCCTAATTGCTGGGATTACAAGTATGAGCCACCTTGCACAGCCAA
ATGTTCTGTAACTATTAAGAATAGATCAGATTTGGCCAGGTGTGGTGGCTGACGCCTATAATCCCAGCACTTCGGGAGGC
CAAACCAGGCAGATCACCTGAAGTCAGGAGTTCAAGACCAGCCTGGCCAATCTGGCAAAATCCCATCTCTA-CAAAAAAA
-------TACAAAAATTAGGGGGG-CATGGTGGCACATGCCTGTAATCCCAGCTACTAGGGAGGCTGAGGCATGAGAATT
GCTTGAATCTGGGAGGCAGAGGTTGCAGTGAGCTAAGACTGCACCACAGCATTCCAGTCTGGGTGACAAAGTGAGATTCT
GTCTTGGAAAAATCAAATCAAATAAAATT-AAAAATTTTAAAA------------AATAGACCAAATTCTACGGTAGAAA
ATTTGGGTGGTGGAGACTCAGTGTGTGGTTCAGCAGTGATATTATGGATAAGGTGTTGCAGTATCAGACCCCTGCATCAT
CACCATTTTATTACCTACATCCAGCT-TTTTTCTGTATTTAATAGATACTTGATTTATTTTGAAAGAGCCTTGTCTTCTT
TTTCTGCCATATACTCATAATTGTCCACTGGGACAATTCCCTCATATTTATATTTTCCTCCTGGAAACAAA---------
--------------------------------------------------------------------------------
--------------------------------------------------------------------------------
--------------------------------------------------------------------------------
-------------------------------------------------------ACAGTTCCTTCTTTACTTCTAATTA
GATTTCCAAAATCAGATGTTTATTTCTGGAATAATATTTCAAAATAACATTCTGGATAGTATGTGGTCATGCTACAAAGA
ATTGATCCACCTCAGTTGCATTATTTAAAAGAGTATAAAAAGGTGTTATT--TCTGTCTAAAAT---------TGTATAC
CTATCTGGTGGTATCAAGTTCTTTCTAACGACATAAAATTCAGACCAGTATTGGTTTGGTTCATACATAATATCTCATTT
GCCAAGTGTTTGTGATTTTTCCCGGAAATCTGAAACCTCAGATGTTATCTGAGTACCTCCCTATTGGAAATAGCTTTGAA
GGTCTTATGCCTCTCCAAACAGGATTCTTCTCTTGAGATGTCTCAAA--CCCCCAGGAT---------CCAGGTTCTGCA
ACCTCACTTTCTAGCCATCTCCCTGGGAACTCA-TGTACATAGTGATGATGTTTCCACCCATTGAATGTTAGAGTTTCTT
TTGTAAGGCACCAAAGTTTTGTTTTGTTTTAAAATCCACCCCCCCCCCCC---------------------CCTTTT---
-----------AATGTCCTATGAGTTTAAGAAGGTAGACATG--------------------------------------
--------------------------------------------------------------------------------
--------------------------------------------------------------------------------
--------------------------------------------------------------------------------
-------------------------GAAAGGTTAATTATTTCATTTTGGAAGACAGAAAGTGTA-CTTCTGAGAGGTTAA
GATCTTCCCATGTTCTCACAGAAAGTAAGTGGGAAGGCAAA--TGAGAACATTTTGTTTGGCTCCAGAGTCAA-------
--------------------------------------------------------------------------------
--------------------------------------------------------------------------------
--------------------------------------------------------------------------------
------------------------------------------------------------------------AGAGTTTG
CACTCTCTCTTCTCAGGACCCCCAAGAAGAGAGTTCAAGTGCATCGATGGGCTGAAATGATAGGAAGTCAGGGGTGTTCC
AGGGACATAAGATCAGAGATTTGGAAGGGAAGGCATTTTTTT-TGTTGTTT-AATTTTTAGGATTGAGAAAGTGACTTTG
CAGAAGCCAAAAACCTTCCTTAATGAAAAAAGGAGAGTATTTCGAGCTCCTGATCTGAAAAGAATGCTCCAAGTGTTAAA
AGGTGAGGAGAGCTGGCTCAACTGCGGGGTTGTGGAATTCAAGTT------GTGTCGGGGTGCTAAATGGAGAAGAGGGT
GTGGTTTCCAAACATGGATAGAAGGGATAGGGGAAGATGGATATTATCTGCTGCTGATGGGATTATATTTAATGGGAAAT
GGCTAGGTGGCTGTTTCACCCTGTCATTCACCAGTTTACTGCCC---TACCATAGGGTATGCCTACTCTTTCCCTAATCT
GGAGAGAAAATGAATTTCAGTGCTGACTCCTTTTACTTGTATTCAGTATTATGCATTTTTATCATTTCAGAACTGACAGA
AGTCCAACGCTACTGGGGTAAGGAGAAATCACATTATTGTAAGCCACCCAGTGCCTACTCA--------TTATTATTATG
TTTATCTTTTAAGAATTTTATGTTTTA-----------------------------------------------------
--------------------------------------------------------------------------------
--------------------------------------------------------------------------------
--------------------------------------------------------------------------------
--------------------------------------------------------------------------------
--------------------------------------------------------------------------------
--------------------------------------------------------------------------------
--------------------------------------------------------------------------------
--------------------------------------------------------------------------------
--------------------------------------------------------------------------------
-TTCTATTAGGTCTCATGTTTTAAGATTTATATTTCTTCTTCTGACACACACATAACCTACCCCTCCTAAAGTTACATTA
TATATAATGT---------------------------------------------------------------------A
ACAAAGTTACGTTATATCCTTTACCTGACCTGTTAATTTTTCTACAGCTCATGTGACACTGGTTCCAAGTCACCCTTCAT
ATACTATCATTTCTGAAGATGGGAGACAAGTGAGATATCAGAAACCTATACGTCACCTACTTGTGAAAGTCCAGTATTTT
TATGGCGTCCT------GGGCTCCCCAAGTATCACATCAGGGAAACATTACTGGGAGGTAGACGTGTCCAATAAAAGGGC
TTGGACCCTGGGGGTATGTGTTAGCTTGAAATGTACTGCAAATCAGAGTGTTTCAGGAACTGAAAATTATCAACCTAAAA
ATGGCTACTGGGTTATAGGGTTACGGAATGCAGGTAACTATAGGGCTTTCCAGAGTTCATTTGAATTTCGTGATTTCCTG
GCTGGTTCCCGCCTTACTCTTTCTCCTCCTTTGATCGTGCCCCTCTTTATGACTATTTGTCCTAATCGGGTCGGAGTTTT
CCTAGACTATGAGGCTCGCACTATCTCATTCTTCAATGTCACAAGCAATGGATTTCTCATCTACAAGTTTTCTGACTGTC
ATTTTTCTTATCCTGTATTTCCATATTTCAATCCTATGACGTGTGAATTACCCATGACTCTGTGCTCACCAAGGTCTTGA
ACCATCTTACACACTCAGCCGCTTCTGTACAGCACCTCTTACCCAGGGGCATCTCATACACCTGAACTCATTTGCACCAT
ATTAACCATCTTCTTCTTCTTGTCTCCCTTCTCCCTTTTTAAAAATTTTAT-----TCCGT-AAATGTAGTAATTGCTTT
GTGTCATATTCTACCCAATATTTTATTGACATTTGATAGCAATTTTTTT-CATCATTTTCCATACTGCCAAGGAAAACTG
ACCTATACTTCATAAAATGAGACCACTATTTAGGTATTACTTCTGCCAAATATTTACCACCCAATTGCCTCTGACACTGG
CTAAGAAGACAAAGAAAAGCTTTTCAACAGCCTTTCT-----ATATCATCTTGTAGTATTTGCTCACCAAAGAATGAGTC
CTTAGCCCTGTGTCAGTTTACACT-------CTTACTCGTCAAAGAGTTAAAGAAAAAATATCATAAAAGGTATACTCT-
AAGTGTAGAGGTTTTGTAACTACAGTATCTGAGTATGACTCCTGT------------CTCTCCAT----CAGCAGTGTAA
CTGTGAATAACATACTTAAATAGCTATGCTTCTTTTCTTTTCTTT-CTTTCTTTCTTTTTTTTTTTTTTTCT--GATGGA
ATTTCACTCTTGTTGAT-GGGCTGGAGTGCAAAGGCGCAATCTCAGCTCACTGCAACCTCTGCCTCCCAGGTTCAAGCAG
TTCTCATGCCTCAGCCTCCCAAGTAGCTCGGATTACAGGCACCTGCCACCACACCTGGCTAATTTTGTATTTTTAGTAGA
GACGGGGTTTCACCC-----TGTTGGTCAGG-TGGTCTCAAACTCCTCACTTCAGGTGATCCACCCGCCTCAGCCTCCCA
AAGCACCGGGATTAGAGGTGTGAGCCGACATGCCCA----GTCTGTACTTATTTTCTTAAAATAACTTTTGTATTAAAAA
CTTTACCTTAAATAAGTTCTAATGTTCTATTGCATAGTAGTATAAGTAGAGTTAACGAGAACATATT---------TTGA
AGTAGCTATAAGAGAAAATTTTTAA------------------------AATTCTCATCACAAAGAAATGA--CATATTT
GAGGTGATGGA-ATGCTAATTACTC---TGGTTTGATTATTATACAATGTATACATGTATCAAAACTTCACACTGTACCA
CATAAATATGTACATTTATTATTTGTCAATTAAAAGCAAAATAAAACAAA----CTTCATCTAATACTTTGGATCATTGT
GAAAAAATAAATTCCTGAAGTATAAAGCATCT
>Callicebus_moloch_TRIM5
GCAGCTCCTCTTGGAAAGACTCCTTCGAGCAGATCAGG-CCCCTGGATTGGTGAGTGAATCCTAACCGTATCTT----CC
CTGGCCGGCCTTCACTCTTCTCCCCAGAATCACCACTTCTGTACTGGTGTCTGAAGGTGTACTGAGTGGTTT-GTGGAGG
GCAAAAGTAGAAAGTCTTTCGGACAAAACTGAATTTGCTTTGGTGAGTTTAACTTACCT-AAAAGCTGTTCTGGGGTGAG
GAAAAGACACAGTTCACAGACTTTCTGCCGCCAAGGTTGACTAATGGGAACAGAGCTGCCTGGTAAGTGGGCAGCTTTGA
AAGAAGGGAGAGCTTT----------------------------------------------------------------
--------------------------------------------------------------------------------
--------------------------------------------------------------------------------
--------------------------------------------------------------------------------
----------------------------------AAAGTGAAAGGCTTTGTTTCCTGGAAGGCTGGTTATTTTTCCGGGC
TGACTCTCT-----------------------------------------------------------------------
--------------------------------------------------------------------------------
--------------------------------------------------------------------------------
--------------------------------------------------------------------------------
--------------------------------------------------------------------------------
--------------------------------------------------------------------------------
--------------------------------------------------------------------------------
--------------------------------------------------------------------------------
--------------------------------------------------------------------------------
--------------------------------------------------------------------------------
--------------------------------------------------------------------------------
--------------------------------------------------------------------------------
--------------------------------------------------------------------------------
--------------------------------------------------------------------------------
--------------------------------------------------------------------------------
--------------------------------------------------------------------------------
--------------------------------------------------------------------------------
--------------------------------------------------------------------------------
--------------------------------------------------------------------------------
--------------------------------------------------------------------------------
--------------------------------------------------------------------------------
--------------------------------------------------------------------------------
--------------------------------------------------------------------------------
--------------------------------------------------------------------------------
--------------------------------------------------------------------------------
--------------------------------------------------------------------------------
--------------------------------------------------------------------------------
--------------------------------------------------------------------------------
--------------------------------------------------------------------------------
--------------------------------------------------------------------------------
--------------------------------------------------------------------------------
--------------------------------------------------------------------------------
--------------------------------------------------------------------------------
--------------------------------------------------------------------------------
--------------------------------------------------------------------------------
--------------------------------------------------------------------------------
--------------------------------------------------------------------------------
--------------------------------------------------------------------------------
--------------------------------------------------------------------------------
--------------------------------------------------------------------------------
--------------------------------------------------------------------------------
--------------------------------------------------------------------------------
--------------------------------------------------------------------------------
--------------------------------------------------------------------------------
--------------------------------------------------------------------------------
--------------------------------------------------------------------------------
--------------------------------------------------------------------------------
--------------------------------------------------------------------------------
--------------------------------------------------------------------------------
--------------------------------------------------------------------------------
--------------------------------------------------------------------------------
--------------------------------------------------------------------------------
--------------------------------------------------------------------------------
--------------------------------------------------------------------------------
--------------------------------------------------------------------------------
--------------------------------------------------------------------------------
--------------------------------------------------------------------------------
--------------------------------------------------------------------------------
--------------------------------------------------------------------------------
--------------------------------------------------------------------------------
--------------------------------------------------------------------------------
----------------------------------TATTAAGTACTCCTGTTTACTTCTTTTATGAATGTTTCAGGGGCCC
TCTAAACCATCCAAAAAGCCAGGCATTAGAAAAGACAATTCTGAAGCCTGAAGTTTGATTTTGGCACATCTGTTAAATGT
TAGAGGTTTAAAACACTTGATTTTATAAAATTGACATAAATTAATTTTTTTGCCAAATGACTCAAAAGGCAAAAGCCTTT
CATTAACCTACACTATGACATGATAATCCTGTTTAAAGCCAAATTTTACCCTTGCATTGATTTATTAAAGTTAGCCCAAA
TTTGTTTAAATGAAATCCTATAGATCATTTCATATCATCTTAACCAATTTAAGCATGAGGTGAAATCTTTACAAACCTTT
TATAACCCTTTTACTAAAGGGCAGATAAGTCTCTTCAGAACTCCCTGCTGTGCTTTTATTTCAGTCCTCAATTTATGAAA
AGACTATATAATACCGTTTTGAGTTTAGTTAATGTTTACACTTTTTTTT--GCAAGATTAATTTTTACAGTCTTTCTATA
ATTTGCTTAAATTTCTAGCTCTATTTTATCAAATTTAACATCCCTCATCCCAGGGCAAAATTTACATTTCTATGCTTTCT
TATAATCTTTCACTAAAAAACATATTTTACTGTTTTTATATGCCTTGCATGTAAAACTGTTTAGTGATCTCAAATACATG
TTGCACTGTTAACTTTTAGCAACTTTTATTTTTCATTAAGAAACCTTTGTAGGGACATGGATGAACCTGGAAACCATCAT
TCTCAGCAAACTGACACAAGAACACAAAATCAAACACCGCATGTTCTCACTCATAGGCGGGTGTTGAACAATGAGAACAC
ATGAACACAGGGAGGGGAGCACTATACGCTGGGGTATGTTGGGGGGAAATAGGGGAGGGACAGTGCGGGGGGAGGGACAG
TGGGGGGGTGGGGAGTTGCGGGGAGATAGCATGGGGAGAAATGCCAGATATAGGTGAAGGGGAGGAAGGCAACAAATTAC
ACTGCCACGTGTGTACCTATGCAACAATATTGTATGTTCTTCACATGTACCCCAAAACCTAAAATGCAATAAAAAAAAAA
AGAAACCTGGTTAGTAAGCAATTTTAATTATGTACCCGGTGTGGTTCCTAGGACCCAGACAGAAGTGCAGATAAAGTCTG
ACTTTTCAGCGTCTAGCTCCATGCGTCCTAGAACTTACCTATTTATAAAGCAGGCAGTATATAACCTTGGAACATTTAGC
AAACCTAGTATCTAAGTTGTATGATTTAGACCACCTGTTTGCATTTTGACAGCACTTGCATCTTACCAATAATCCTTAAG
ACAGTTTTTATTTCTT----------------------------------------------------------------
--------------------------------------------------------------------------------
--------------------------------------------------------------------------------
--------------------------------------------------------------------------------
--------------------------------------------------------------------------------
------------------------------AAAGTTACATGAACTAAACAATATTTGATTTATGTGCTTAATTTTCCTTA
AGCCAATTAAT--TAGAGCTCTTTTTATAGATATTGTACATAACACATATATAGGAACACAGA----AGATTCAGCACTT
GTAAGATTTTTTTTATTTGCCAGTTTTTTAATTGGATTACTGGCTTTAGGATGGAGTCCTTGGAGGAACAGGACCAGGTA
GCATGCATATTTAGGGCCGAATAAGCAGGCACAGCTGAAGGCAAAGTCAGGTTCCTGAAATTAAGAGTGCCACTTTATAC
TGGATTTTGAGTCCCCAAAAGGAGGCAGATACTATGGAAGAAGACAGTGTTCTGCTTTTACCGTGTGTTTCATTACAAGG
CAACACAAAACCAATTGGCTTATTTTGCAATTAGCCCACCCCACTATGGGAGTCTTATTTCTTAGTGCGGGGTGGGGATG
TTTCCATATTTTTTAGGTGGCCAAGAGTATGCTTCTCTGATTTATAACTACTGTTAGGCATCCCTTACAGTGTATTTCCT
ACCTAGTTGTT-CCACACCAAAGCTCTGTCATAATGTGAAGTAATTTGATACCCCCAAAACTTAAAACAGTAGATAACAC
AATGCATAACAGAACACAGCCTTTGATTTTGAGAGGGAACTATCTGCTTTTAAATTTAGGAGTTTTCATGAGGAAAACAG
AGATTTTTTTTTTTCCAAAAGGGGGTCTGTGGTGCCGCCTCTGTTTTTTCCCAAGGAGTCCCATGCTACCAGAAGTTATT
TTAAGGCCTCTCATGCATGCATTAAGAGTGGTAAGACCAAAAAAAAAAAGAAAAGAAAAAAAAA--------------GG
GAGAAAAATAATTCAGTCAACAGAGAAGAAAAAGAACCTTTTTTCCAGAAAAACAAGATCCAAGAAGAGAAAAAGGCCTT
TTACATATACCTGTAA----------------------------------------------------------------
--------------------------------------------------------------------------------
---------------------------------------------------------CTTGAATATCCACTTATAATTAG
GCTGAGAGCTCTTTAAGAAAATCCTTTTAAATCTCTTGTTACTTGACTTCAGCCATGCCAAGCAGGTAAGATTTTCAGCT
TTTGAACTTTATAGAAAATAACCTCACAGGTGAAAGCAACAAACCTTAGTTAGGTTGTGAATGAACCACAGATATACAAG
GTATTTTCAAAGGGGTGATGGACAGCTTTTGAAACTGTCATTGCAAAATTATAACTGAGGCAGTGGAAGAGATCCAATCC
AAACAACTCCATTTTCTTTCCAGCCCCCAAGCTCTCCTTGCCCATCCCT-GAGCATAGGCTGAACCAACTTTGGGAGAAG
CCTGGTTTACAGTTTATACTCTAAAACAAACATGGTAACAGCTCCTTCTTAAGATATACTTCCTTCTTGCCTGGGGACCA
GACCAAGAAACTAGCCATAAGATTAGAAACCATGGCTTAGGAGTCATGCAACTGGAAGCTACAAGATTTTGACCCTTCCT
AATCTGCTCTCAAGACCATTGCTTAAGATATTTTGTAAACTCTGTCCTTGATGGATCAGCTGGCACCATTCCAGAAGAGT
GGAAGCGGAAGATTGAAAAACTGGCTTATCTGATTTTGTGGCCCTCACCCAGGAACTGACTTAGCACAAGAAGACAGCCA
TCATTGTAAACTGGTGGAGACTAAAAGAAAGTATTGCCACGTGGTTACAGGTCACTTTCCTGAGGACATGAAACAAGATG
GACTCTTGTAGCCAAGTTTTTTACTGACCATTTTGTTGGGCTGGCTCGAACAACAGGCTTATGAGGTCCTGGGCCTGATC
CTATCCTAAGATACCTTTTCTTTGACAGAACCATACAGAAAGACATGCAAAGCACATCAGATGGCCTACAGCTTAGGACC
AACCTTACGAATTCTTTTTCATTAATTATAACTTTACAGAGAATATAAACAACAATTCTTATCATCCCTTTTACTGGTTT
GCATGGGGAGAGAGAAGCCAAAGACCTGACTGGTAAGAAATTTTTACCCTTTTGCCAGCATATCAGGCTCTGAGTTCCTT
CCCCTTAGCTCAACTCTAAGCCAAGCATTTTAAAGTTGGAAAACTAACTTTTCCAAGTTTGGAATAACATTATTAAAAAG
GCCATTTTAAACTGTGAAAGAAGGAAATACACCATACAAAGGAGTTCCAATTAGAGTTGTCAAGAGATATTGTATTTCTT
CCTATTGTCAATGGTGTTTCCCCTCTTGATTTGCCTTCCCTATTCCCTCCTTTCCCTTCTGGCCTACTATGAGACATGTT
GCTTATCTCCAAAATTCTTTTCTTTTTGTAGAGCTGCCTGTTTTAGCTGTAGTTAGGGTTTGGCTTAGGAGCAGCATAAC
ATTCTTCCATGAGAGGTCAAATACCTGAGTTAAA-TTTTGGAAAGCTTCGAAATACCTATCAGGGTTATCAGGAAAATCG
GCCTATATCTTGCTTTACTTGCCTAAAGTCCTGCAATGAGAAAGGAACTTGAAGAGGCCCAAAGTAAGAGGGATTTTCAG
ATGGTTTCCCTGAAAATGACTCTTTTAATTTGGGGGAACTATTTTCCCTTGGCCTGCTCGATATGATTTCTAAAAAAGCT
GCATTGATTTTACAATACTTGAAAAGGTTTGGTAAAAATGCCACACCCTTGTGAAAAGAAGATGGGTTGCTTTCTTTAAA
GTTCTGAGGTTAAGGAAGTTCCAGTGTTTCAGAGTGCACTCCAGAAGGGTGCAAGTTGAAGATAACTTATTACCCATTTA
GAAAAAGAAACAAGAATAAAAGCATCCTCTTAGTCTCCTTCCTTTCCGTATGACCCAGGGTGGGGGAGAGGACAGGGAGC
ATCCTTCGAATGCTTCCTCTCCCAGGTTTCTGGATCCCAGCACTATGTTAAATGTGCCCTCCATGGTTATAGGTGTGGTC
CTCCAAGCCATGGAACCAGATGAACGAAGTGATGGGGCTAGCCATGCTTAACCATGCAGCCTTAGTTTATCCACCTTGTG
TGATTTCCGTTTGACTTGCTAGAACCTGTGTAATTTGCCTGGCTCCCTAAAAAACAGATCTCTGGAGAGACTGTCGCCTT
TGGGCAAGGATCCTTTAACAGAGTCAATGTGCTAGATTGCTTACTATTACAGTCCATGCTAAAGCACTCACCCTTAAAAA
AAAAAGTTCTGGTTAACTTCCAAACTTAAAATTCCCTTACTAATTGAGTACTGTCTTAATCTGAGACAGAGTATGTGCCT
TAAAAGAACATAGAAACGAATAGCCATTTTCCTACTGATGGGACAATATCGGGACTAAAATCTGGCTGCAGAAGACGTCT
TACTCCGAACTGTTAAATGCAGAAACTTCCCGTTCCCAGAAGAGACCTACAGCTTGATTTCTAACAATGGAAAAGGAAGT
TGCTGTGTTATGGTGGAAAAAGAGGAAAAAGGTGTGCCTCAGGTAGAGGATTTTTATTTCCACTAAGGGACGCTGTTGGC
TTAGAAGTACTATGTGCTTGCCAGCGACGTGGTAGT-AAGTAACCTCACCATAGGAGAAAGGGGAAAA--CTGTTCCTAG
AGGCATTTTCCTGATCTTGCCTAACAGGATTACTTTCCTAGGCTGCAAAAATCCCTGCACATTTCACACACAGAAAGAGT
AAGAGGTTGCAGATAGAGAAGGAAGAAGAGTTTTGCAACAGAATAGTTAAGGATTCTCTGCCAACACTCAGAGTGGGCTG
TTGGAGGCTGCGTGTGGTCCAGGGGCCTTTGAATCACGCCAGGGTGTGCCCTGGCCAGAAATTCTCAGTTACCTCAGAAC
TTTTCCCAGCTTCTCATGATGGTGAGATCCCCCCATGAAAAGAAGCTAGTTCCAAATGGCCAACATTTCCAGTGCCCATG
GGGATTGGGGAGTTCTCCATGTTCCCCTCAGCAAGCCTCACATCTGAGTTTTTAGTATGACAACCAATGCTAAGCGTATG
TACCAGGCTGACAGATGCCCATTGATTTATTTGGTTTCATTATAATATAGAGGCCAAGAGTGCTTTAGACTAATAGAACA
GATTTTAAGCTTCCTCCCATACTTACCACTCCAATGAAGGCTGTACCTTGGATTCCTGGACCATGCACCAAAATGATAAA
GCTCTCATGACTGGAGGAACACTAGGGTTCTTGGTCTTG--ACTGATAGGGTTAATGACATGGACACATGTGGAGTGGTT
TTAAGGAATGAACAGTTTAATAGGCAAGAAAGAAGG---------------------------------AAGGAAGAC--
-AAAAA---CAGCTCCACCATACAGAGACAGAGGGAGGGGG-ATTTAAACAAAGCGAAAACCTCATGTGC-----AAAAA
G-GCTGCTTATATGAGGAGGCTAGAGGAGGTGGTGTCTGATTTGCATAGGGCTCAGGGAG------TGACCAGG--TGTT
ATTCACATGACCCA-TGAAAAA-CCGGCCCTCCCACTCTAGCCCTTCAGTATGCAAATGTAGAGTGCCACGATGTTTTA-
CACACGTGGGGATACGTGGGGGCAGCTATGTTGCCAGGCACATATATGGGCAAGGGAGAAGCCAACAGGAATCACCATGT
TTGG-ATGGACCCAGTTTCTAATGTCCAGCATTTGTGTATTAAAGCTTA------------TAAGAGCCGGGGCTTTCCT
GGTAGACAAGAAATGTTTCTGGAGCTGCCTTAAAACAAA----AACTTCCCAAGGACCCCTTTTCCTCTCTATCTGCCTA
AAATAATTTCTTAATATTTCCTATAACACTACTAGATGATATTGCTTAACAAATGAATCTCAGTACAATTTTATTTTTCC
CACCTATATATGAAAAGTGATGCCTTTCCATATAACATCAGTAATTTGCAG-TATATTATGCTTAGGGGAACAGTTTTAC
CCTAGTCACAGGAGAAGAAAATTCTGTCTCTA-TGCATATTTCTTGGATTTTACAAAAACTGGTTATTGTCTTGTAATGT
TTTTGTTGCTTGTCTTTAGCTGTCACCTCTAGGACATGTTGTATTTGCATTTTCATGAGCCCAGATGTCATGAGAAGGCT
CATGTGTAAAGTACAATCACCTGACATCTATGGCAGGTAGCTGACCTGAGAGATACCAGGCAGATAATAATTGTGTTCCC
ATCTCAACCTCCCTGACTGCTGTGCAGCCCTTGGGTCACTGCTTAGGTAGTGGTGGCGTTAGCCTCATGTGTAGAAACTC
TGGCTCCTCTGCACATGCCTCTTTCTGTGTCTCTTATGGCATCAGTTATTTTCACACTGGCTCCTTGTAATCTCACATTA
ATCATAAATTTTACAGCCTCATGACAGATGGCTATCTCCAT---CCCCCCCTCCCATAGGCTCTT-ATGCATCTCAGTGC
TGGTGCAATTTTTAATAGAATAAAAGATTAATGGAGTCCTCACTCTCAGGTTTGGATTACAACTTGAGTCATAAACAAGG
CTAGACATTATTGTATAATGCAAACCTCTGATCTTGCCATTTGTCAGAGCCTGATACAGGCCAAAGCCACTGCAGTATAA
CACTATAAGCCCTTGGCCCATTTTCCGTATCCA-TACCATCGGATGGATTGTGCCTCCACCGCACCTTCATTCAGCCTTG
TTCTTTATGGCCTTCATAGATTGTGGGAGAAGTGGACAGTCTTTATAGGTCTGAATTTATCTCCACACAGCCTTTATAAC
ATTTCCCTTCCTTTTTCATAGCAAGGGAGAGACTCATCAGCTGTCTC--AGTGGAGATCTTTCTTTTACCATGAAACTTT
GACAGCCAGCAACACATCAGTATCTATTAGGGTCTTCTCTTTCCTTGTTTTTGG-CTTACAGCTCCATTTACCTGGAATT
CCTTACAGCCGTGGAACATAGACTGAGGCCACCGGGTCCTTACTGAAACCAGGTCTGTCAGTCAACAACTCTGAGCCACC
ACTCTGTGATACTTCCCTGACTGAACACCAGCAGCAGTTTCCTATCTGGTTTGCCATTTCACTTATGGGAGCTAACAGCC
CTAAACTAGCCAGGCTCATGTAGTTCAGCCAGGGG-ATGCAGGACAGGAGAACTGTGTGGCATAGCTTCCTCAGGTGAGT
TCTCAGTGAGAGTCCCTAGGGTAGTACAGGAGGCATTAT---CTCCATCAACTGAGTGTTTTAAGAAATGAGACTGGCTG
GATGTGTGTGAAA-TGCTGTAGGTTAGATAAGCCTAGTGCCCCAAAGGACTCATTATCTTGTGAAAGCTCATGGAAACAG
TTCTCAGAGACCTAAAA--GAAACATATCAGGTTTTGTGGTGGAAAATGAG-----------------------------
--------------------------------------------------------------------------------
--------------------------------------------------------------------------------
--------------------------------------------------------------------------------
--------------------------------------------------------------------------------
--------------------------------------------------------------------------------
--------------------------------------------------------------------------------
--------------------------------------------------------------------------------
--------------------------------------------------------------------------------
--------------------------------------------------------------------------------
--------------------------------------------------------------------------------
--------------------------------------------------------------------------------
--------------------------------------------------------------------------------
--------------------------------------------------------------------------------
--------------------------------------------------------------------------------
--------------------------------------------------------------------------------
--------------------------------------------------------------------------------
--------------------------------------------------------------------------------
--------------------------------------------------------------------------------
--------------------------------------------------------------------------------
--------------------------------------------------------------------------------
--------------------------------------------------------------------------------
--------------------------------------------------------------------------------
--------------------------------------------------------------------------------
--------------------------------------------------------------------------------
--------------------------------------------------------------------------------
--------------------------------------------------------------------------------
--------------------------------------------------------------------------------
--------------------------------------------------------------------------------
--------------------------------------------------------------------------------
--------------------------------------------------------------------------------
--------------------------------------------------------------------------------
--------------------------------------------------------------------------------
--------------------------------------------------------------------------------
--------------------------------------------------------------------------------
--------------------------------------------------------------------------------
--------------------------------------------------------------------------------
--------------------------------------------------------------------------------
----------------GCCATTATCTTCTTTTGTTATTGATTAACCAATAGTGTAGCAAAAAGGCCATTGAAAGAGGACC
CTGAAAACAGGGTCATCTCAAGTCACCATACTGAAGATAAATAATTTTTGTAAATCACTTCTTATGCCTATGTATACATT
TGATGAAACACCATCATTGACTCTGTGCTGATAATAAGGACAATCATTGCAAATGCACGATGACTGGTGAGATTTGTTAT
ACTGCACATAAGGTGGTCAGAGCAGATATTTTTGATCATGTAACATTTAAGGAGAGAATTTAATAAAATCATACTAACAT
CAGGGAAATATTTTATGCTGAGAGGAGAGCAAATGTGAACGCCCTGAGGCATAGGTGGTTTGGTGATTTTAATATTGAGG
ATGTGTTTTGGCATGGAAAAGAAAAGCCAGGAGAGATTATGGGTCACACGAAGATCTTGGTAGAAAAGACCTCAGTTTGT
TTTCTATTCATTGAAGGTAAAGAAAAATGATAACCAATGCACAGATAAGAGCAGAATTTGTCATATGACATGAACTGAGA
GTAAAGTATTTAAGGCAATTATTAAAAGCCCTTATTACCAGGTAACCAAACACCATTTCTTATTT-CTCTACTTTTTTTT
---GTCCTTAAATATTTTCATTTTGCCCATTTTCTAATTGTACACAATCAATATCCTTTCTATTTAGTCTA--TTTCTTA
CTTAGTCACATTTTAACCTTCCCAATCATGCAGGGATCTGTGAGTAAGAGGAATCTCAGCAGCCAGGACAGGCAAGAGCA
GTGGAGCAGCTACTATGGCTTCCAGAATCCTGGTGAATATAAAGGAGGAGGTGACCTGCCCCATCTGCCTGGAACTCCTG
ACAGAACCCCTGAGCCTAGACTGTGGCCACAGCTTCTGCCAAGCATGCATCACCGCAAACCACAAAGAGTCTACGCTACA
CCAAG---GAGAGAGAAGCTGCCCTTTGTGCAGGATCAGTTACCCGTCTGAGAACCTGCGGCCTAATCGGCATTTGGCCA
ACATAGTGGAGAGGCTCAGGGAGGTCGTGCTGAGCCCAGAGGAGGGGCAGAAGGTTGATCTCTGTGCACGCCATGGAGAG
AAACTTCTACTCTTCTGTCAGCAGGATGGAAATGTCATTTGCTGGCTTTGTGAGCGGTCTCAAGAACACCGTGGTCACCA
CACATTCCTCGTGGAGGAGGTTGCACAGACATACCGAGTAAGACACTGGGATGGAGGGAGAAGAGGGCAGAAAAT-GGAT
CTGGTGGAAAATGTTCACTTTGCATTTGACTGTAGTTGCCTTGTCATCACAGGCCTGAGGCCTGGGGTTATTTTTTTT--
----------------CATCCTATGCTTAACTTCTGAGGCTTGAAGGACAGTTTTTTTTT--------GCATTCCACCCA
ATTACAAGAGAATAATCCAACGGTATATATTCCTGGCCAGGAATAAATATTTAGTACCTTGGGTTAGGTGGGTAGAGAGT
TGGTGTCCAAGAAAAGCTCTAATTACCCCTTTCAGCAGGAGAGTAGCTGGAGTGGGATGAGATATAAGTTCTTTCCTTGC
TGCAGCATCAGCTTTTTCTTCTAGGACAAAAAGAATCGGTTTACTCATGGTGACAAGATGGGGAGGTCTATTATCTGAGA
TATAGGGAGCACATTCACCAATCTAAGTTTTCTTCCAAGTCATGGATTTTCATTGCCTTTCTCACTGTTTCTGTAAATTT
GTTTCTTCTGAGATCAACCTGAGTCCTTTCATGTTTATACTCTGTCCA----GGTGCTGGGAAAGCACATAGCTTGACTA
TGGTGTGATTCCTTTCTCACAGGAAAATCTCCAGGTAGTTCTGGAGATGATGAGGCAGAAGCATCAGGATGCTGAAAAGT
TGGAAGCTGACGTCAGAGAAGAGCAAGCTTCCTGGAAGGTAACACGGCATGTTTCCTGAGGGAGTCAGCCAGAAATCTGG
GCAGGACCATGGGAAGGAGCTTTCTTCCTCTTTATTCCCTGATGCTTGTTAAGTCCAGAAGGCATCTGATTCGTCCTCTT
TATCCTT-CCCTGATGGAGTGTGGTGGCTAGGGAGTGAATTTATCACAATGAACACAGACATCTGTAGGGAGCTATTTAC
CTGAAGATTCTCTCCGGTGAAGATGGCTAGTGAATCCTGCATTCCATTTTTGTGCTACTTTTTGAGTCCGTGACTGTACT
TGGGGAAGACATTTGGCAGTGGCTCATAGTTCTGTCCTCAGTGTTCAACTTGTGGCGGG-AGTTTGAGTTTGAGCTGAG-
-AAGTAATACAGGCAGGCATGAGTGTCCTGGATAGCTGTGTGAAAGCTAAGCTACATCCAGGTAACCCATTTTGACTCAG
GATGAACCTGTTCAATATACCCATTCAAGATCATTGTTTTAAAATGTCATGAAGGAAAAAAAAA--TAGGAAAAATCAAC
TTTCCTAAGACCTACTCTCCTGCTTCTATGTCCCCTCCTTGTGAGAACTCCCTAAAAGAAACAGTTATTTTTCTGGCTAT
CAGCCTCTGCCTGATAAACTGAGTGCCTCTTTCTCCCTTCTCATCTCTGAAGATTCAAATACAAAATGACAAAACCAACA
TCATGGCAGAGTTTAAGCAACTGAGAGACATCCTGGACTGTGAGGAGAGCAATGAGCTGCAAAACCTAGAGAAGGAGGAG
AAAAACATTCTGAAAAGACTTGTACAGTCTGAGAATGACATGGTGCTGCAGACCCAGTCCATAAGCGTGCTCATCTCGGA
TCTGGAGCATCGCCTGCAGGGGTCAGTGATGGAGCTGTTACAGGTAAGAAGTGGAAAGAGGCCTGAGCACTGAGATTAAG
GAAAAGTGAAGGCTGTTTCCTTTTTTGTGTTCCTGTGCCCTTTCTAACATTAACAACATTCCCTGCAGGACTGCTTTTTT
GAAT------------------------------CAATTGCTGAAGTTACAGGAATAATTGAATGTAGAAGTAACAAGAG
ATAATCCAATTTTTATTAATTTATCC-AGAGCAGTACAAAAATTTGGCATAGTAGAGATGATCAATTACCTCTAGTGATG
TTTGATAGGTTCCTGTTCTCTGTATTCTAGTGTCATGCACTTATCAATGCAGCTTTTCATTGCTCACCTTAGTCACAGGC
AAACAAATGCACGTCAAAATACAAGATGC--TTTTTATTTTTTCCCTTCATGGAATGAATTGAGAACTTTTTCCTCTTTT
TTT-ATTTT-CTGAAAAAAA-TTAAATAACTGCTATTATTTCTTCTTTATATACACAATAGAATTCACTAGCAAA-----
--------------------------------------------------------------------------------
--------------------------------------------------------------------------------
--------------------------------------------------------------------------------
--------------------------------------------------------------------------------
--------------------------------------------------------------------------------
--------------------------------------------------------------------------------
--------------------------------------------------------------------------------
------------------------------------------------ACCATTGTAGTCTGCTGTTTATTTTGAAAAGG
TATAAATTTTTTTTTTACATGTATCGGATTTATTTAGATTTTTT--------TGAATATGTTCTTGGTAATATATATCTC
TATAGAAATCTGTCCATTTCATCTAAGTGGTCAAATTTGTAAGTCCAAAGTTGGTCCTAAGAATTATTTATAACCCCCCT
ATTTTTTGTCATTTTTTTCTTTTGTTGTCTTTATTTAAATTGATACATAAAAGTTGTAAGTATTCAT-ATGTAAAGCATG
CAGTTTTTTAA--------------TATGTATATATTGTGGAATGGCTAAATGGAGCTAATTATCACATGAATTACCTCA
CATGCTTATCATTTTCTTGTATTT-AGAACATTTAAAATCGACTCT--TCCCAATTTTCAAGAATACAATACA-------
--------------------------------------------------------------------------------
--------------------------------------------------------------------------------
--------------------------------------------------------------------------------
--------------------------------------------------------------TTGTTAACTATAATTGCC
ACATTGTGCAATAGATTTCTTGAAGATAGTCTTGTTTTTATTCTGAAGTTGGTGTCCTTTTACTAATATCTGCCTCAACT
CTCCCTGCTTCCCAGCTCCTGGAAACTCCTCTTATACTTGCTAATTTTTCACATCTACATACTAAGTGATATTATACAGT
ATTTGTTTTTCTGTTCCTGATTTGTTTTACTAAAAGTGCTCCGGGTTTATC--TGTTTTGTGACAACAGAATTACTCTCT
TTTTTAAGGCAGAATACTATTGCATTGTGTATACATATGTGTGTATCTGTGTGTATATACATATATATATAAATATAGCA
CATATATACTGTGTGTGTGT--------ATATGTATATACTCACATTCAACTGTTGATGGATACAAGCTGATTCCATTTC
TTGGCTATTGTGAATAATGCTGCAATTAACACAGATGTGTATATATCTCTTGGAAATGTTTATTTCACATTTTTTGGATA
TATATTCAGTCATAGGACTGCTGAATCATATAGTAGTTCTATTTTTAATTTTTTGAGGAGCCTCTATACTATTTTTCACA
GGGGCTA-------------------------------------------------------------------------
--------------------------------------------------------------------------------
--------------------------------------------------------------------------------
--------------------------------------------------------------------------------
--------------------------------------------------------------------------------
--------------------------------------------------------------------------------
TAATAATTTTCATTCCTGCCAGCTGTGTGCAAGGGAACACTTCTTTTCACATCCTCTCCAACATATGTTCTTCTGTCTTT
TTTATAATAGTCATTCTAAACAATGTGAGGTCATATCTCATTGTGGTTTTAATTTACATTTATTTTATGATTAGGGAT--
--------------------------------------------------------------------------------
--------------------------------------------------------------------------------
--------------------------------------------------------------------------------
---------------------------------------------------------------ATTCTGCATTTTTTT-A
TATACCTGTTGGCCATTTGTATAACTTCTTTGAGAAATTTCTATTCAGTCTTTTTGCACATTTTTTGCTTGGGATATTTG
TTTATCTGCTTTTGAGTTGTATAAATTCTTTATATATAATGAATATTAACTCTCATCAAATATATGGCTTGCAAATATTT
TCCTCTGACCCACAGGCTAACTTTTCATTTTGTTGATTATTTCCTTTTAGTGCAGAAAATTTCAGTATGATGTAATCTCT
TTTGTCTATTTTGAGTTTTGTTGCCTGGATTTTTGGGTTTATAGCTAAAATAATCATTGGCCTGAATAATGTTTGCAGCT
TTTCCCCTATGTCTTCT---AGTAGTTTTACTGTTTCAAGGTTTATATTTAAGTATTTAAGCCACTTTGAGATGATTTTT
GTATCATTTCAAAGTGTGAGATAGAATATAATTT-TAGTCTCCTGCATATGGTTATCCAGTTGTTCCAACACAATGTATT
AAAGAGAAAAGAGACTGTCCTTTCCTCAATGAGTGTTGATACCACTGTCAAAAACTAATTGACCCTAAAGGCATGATTTT
TTTTCTAGCTTACTATACTGTTCCATCGGTCTATGTGTCTGTTTCTAATGCTAGCACTATACTGTTTGGATAACTGTAGC
TTTGTAATATATTTTGAAGTCAGGTAGTATGTTGCTTCCAGCATTGCTCTTTTTGTTCAGGATTTTTCTCGTGATTTAAG
GTCTTTTCTGGCCCCACACAAACTTGAGGGTTGTTT--------------CATCTATTTTTGTAAGAAATGTCAGAATTT
TATTAAGAATTGCATGGAATCTGTAGATTACTTTGGGTAGCATGTACATTTAAGGATATTACAACTAGACTACAACCATA
TTACAATTCATCATTACAGCAGCCTTAGAGCAGGCTTATAAGAGGTCCTAAAGGGAGTGCTGAACATAGAACAGAAAGAA
CAAC---TGATAC----------CACAGAAACACACTAAAGCACATACCATACAGACAATATAAAACAACTACACAATCA
AGTCTACCTGGTAGCCAACTAACAGCATAATGTCACGCACCAATACTAACCCAGAATGTAAATGAGCTCAATGCCCTACT
TAAAAGACATAAAGTGGCAAAAGGAATAAAAAGACAAGACTCAA--CTGTCTGCTGTCTTCAAGAGATCCATCTCACATG
TAATGACACCCACAGACAGGCTCAGAGTAAGGGGTTGGAGAAAGACTTAACGGAAATAGAAAACAAAAAGGAGCAGGAGT
AGCTATTCTTATATC-GATAAAACATACTTT--AAACCAATGACAATTAAGAACAAAAAAGAGAAAACATGATAAAGGGT
ATAATTCAACAAGCAGACTTAACCATCTTAAATATATATGCACCATAGGCGAGAGCACCCAGATTCACAAAACAAGCTCT
TC-TGATCTGAGAAACAACTTAGATGACCTCATAATAATACTGGGAGACAT-AACATTTAACCGAAAGCATTAGACAGAT
CATCAAGGCAGAAAACTAACAAAGAAACTCTGGACTTAAACATGATGATTGATCAATTGGATCTAATTGACATCTGAAGA
CTACTTCACCAAACAACCACAGGAAATACATTTTTCT-----GGACCAGAACATATTCTATGATCAACCACATATTTGGT
CATAAAGGAAGTCTCAATATATT----AAAAAAAAAAAAACAAAA-----------------------------------
--------------------------------------------------------------------------------
--------------------------------------------------------------------------------
--------------------------------------------------------------------------------
--------------------------------------------------CTGAAATCATAACCAAGTATACTCATGAAC
CAGAGTGCAATAAAAAATAGAAATCAATATCAAGAAGACCTCTCAAAACTACACAAATACATAGAAGTTAAACAACTTAC
TCCTTAATAAATCCTGAGTGAACATTAANNNNNNNNNNNNNNNNNNNNNNNNNNNNNNNNNNNNNNNNNNNNNNNNNNNN
NNNNNNNNNNNNNNNNNNNNNNNNNNNNNNNNNNNNNNNNNNNNNNNNNNNNNNNNNNNNNNNNNNNNNNNNNNNNNNNN
NNNNNNNNNNNNNNNNNNNNNNNNNNNNNNNNNNNNNNNNNNNNNNNNNNNNNNNNNNNNNNNNNNNNNNNNNNNNNNNN
NNNNNNNNNNNNNNNNNNNNNNNNNNNNNNNNNNNNNNNNNNNNNNNNNNNNNNNNNNNNNNNNNNNNNNNNNNNNNNNN
NNNNNNNNNNNNNNNNNNNNNNNNNNNNNNNNNNNNNNNNNNNNNNNNNNNNNNNNNNNNNNNNNNNNNNNN-NNNNNNN
NNNNNNNNNNNNNNNNNNNNNNNNNNNNNNNNNNNNNNNNNNNNNNNNNNNNNNNNNNNNNNNNNNNNNNNNNNNNNNNN
NNNNNNNNNNNNNNNNNNNNNNNNNNNNNNNNNNNNNNNNNNNNNNNNNNNNNNNNNNNNNNNNNNNNNNNNNNNNNNNN
NNNNNNNNNNNNNNNNNNNNNNNNNNNNNNNNNNNNNNNNNNNNNNNNNNNNNNNNNNNNNNNNNNNNNNNNNNNNNNNN
NNNNNNNNNNNNNNNNNNNNNNNNNNNNNNNNNNNNNNNNNNNNNNNNNNNNNNNNNNNNNNNNNNNNNNNNNNNNNNNN
NNNNNNNNNNNNNNNNNNNNNNNNNNNNNNNNNNNNNNNNNNNNNNNNNNNNNNNNNNNNNNNNNNNNNNNNNNNNNNNN
NNNNNNNNNNNNNNNNNNNNNNNNNNNNNNNNNNNNNNNNNNNNNNNNNNNNNNNNNNNNNNNNNNNNNNNNNNNAATCA
AAAAAGTGCATCAAAAGTTAAATAGACTTTTTCCTGGCATTCAAGGCTGGTCTGATATATACAAATCAGTAAGTGTGATC
CACAACATAAATAGAATTAAAAGCAAAAGCCATATTATTATTTCAATAGGTGCAGAAATGCTTTCAGTAAAATCCTACAA
CCCTTCATGATAAAAGTCCTAAACAGACCAGGCATCAAAGGAACATACCTCAAAATAATAAGAGCCATCTATGACAAACT
CATAGCTAAAATCATACTGAATGGGCAAAACCTGGAAACATTCCCCTTGAGAAATGAATCAAGACAAGGATATGCACTCT
ACCACTCTTATTCAACATAGTACTGTAAGTCCTAGTCAAAGAAATTCTGTAAGTGAAAGAAATAAAAGACATCCAAATAG
AAATAAAGAAAGAAGTCAAACCATATCTCTTTGCTGACAATATGATTTTACACAAATATATATATATA--TTTCAATCCA
TGAACACATTTTTTTTTTCATTTTATCCGTGTCTTTTTAAATTTCTTTCATCAATATTTTATAGTGTTCAATGTACAGAT
CTTTCAACTACTTGGTTAAATTTATTCCTATTTTATTTTATATCTATTATATATGGGGTATTTTTCTTGATTTCTTATGA
AAAAAA-TTGTTAGTATATACAAATTATTTATTTTACATCCTGCAACTCTGTCAACTTATTAGTTCTAAGAGGTTTTTTT
-GTAGTCTTAAAGATTTCTATGGTGAAATCACATTAAGTGCAAACCGTGGCAATTTAACTTCTTTTCCAATTTGGATGTG
TTTTATTTCTGTCACATGTGTGTTTGCTCTGGCAAGAACTTCCAGTACTTGATCAAACAGGAGTAGTAAGTATGGGCATT
-CTTATGTTTTTCCAGAGCTTAGAAGAAATGCTCTTACCTTCTTTTGAGTACATTTTGAAGTTATGT-TTATGTTATGTT
ATG-----------------------------------AGGCTATGATGTTAGTATGATGTTAGCTGTGGGTTTGTCATA
TATGGCCTTCATTATATTGTGTTAATTCCCTTGTATAGCCAATTTTCTGAGAGTTTTTTTT--ATCATAAAAATATATTT
AACATTGTCAAATACTTTTTCTGCATGAATTGAGATGATCATATGGTTTTTGTCCATTATCCTGTTACAGTATTTTAACA
CTTACATACGTTTGCATATGTTGAACCATCCTGTGCTTCTGAAACAAATCTCACTTTATCATAGTGAATGATTCTTTTAA
TGTGATGTTCAACCTGAGTTAGTAGTATTTTGTTGTTTACTTTCCATCTATTTTCTTCAGGTATATTGATTGACATTTAT
TTTTTTCTTTAGTGTGCTTACATGGATTTGTCAACCTGGATTCATAAAATTAGTACAAATATTCCCTCTTTGTCAATTTC
TTAGAAGAGTTTGAGAAGGATTTTGATTTATTTTTCTTTAAATGTTTGGTAGAATTCAGCCGTGAAGCCAT--TGTGTCC
TGGGCTTTTATCTATCTAATTAATTACTTTTTATTACTGATCCACTCTTCTTACTCATTGTTGGTCAGCTTGTATTTTCT
GTTTCTTTGGGATATAGCCTTGGTAGGTTTAATATGTCTAGGAATCTATCTCTTTCTTCTTTGTCATCTAATATATTGGT
ATAACATTTTATA-------------------------------------------------------------------
--------------------------------------------------------------------------------
--------------------------------------------------------------------------------
--------------------------------------------------------------------------------
------------------------------------------------------------------------TAAATTGA
TATATAAAATTTTATACCAATATATTAGATATATACATAGTTTAGACTACCAATA-GTAGTCTCTTATGATCTTTTGTGT
ATCAGTTGTAATGTCTTCCCTTTCATTTCTGGTTTTATTTATTTGAATCTTCTCTCTTTTATTTTTAGTCTAGCTAAAGG
TTTGTTGATTTTATTTATCTTTTCAAAAAACAAATCTTAGTTTTATTGATATCTTCATTGGTTTTTCTAGTCAATTTCAT
TTGTCTACTTGATTTTTATTATTTCCCTCCTTTGGGTAACATTGACCGTAGTTTCTTCTTCATCTAGATCCCTGAAGTGT
AGTATTAGGCTGTTTATTGGGGATTTTTT--TTCTTTTT-CATGTAAAACCACTTTTGCAAAAATTATATAAATGAGGAA
ATTATGACAGTGAAGGAGATGTGATCTAACAAACACATATTCCCTTTATAGCCTCCAAACTGCCCTTAGGCAGTTAACTT
GAGGAGAAATTTAGTTTATAATTTAAATGATATTAGCCCTTCCCCCAAACTAAACCACCTTTGTAAGGCTAATGAAAGAT
CACCAAGTTAGGAGAATAAAAGGAGACAATTCAGACCAGTCATTATTTCAGAGGTCAGAAGATTTGCAGCCTCCTCAGTT
ACTCCTATAGATAACATCACTATTACAGAACCTACAATTCGTTTTTTGAGATGTAATTTCAGGTTTTTGCATTTCTGATG
ATGAATGGCTCCACCTGAACCCACCAACTGGCCTCATGTCCTTACCCCAAAGTAGAGTCAGGGAACA----CAAAGAGCA
TTTTCCACACCCCTATGATTATACCTTTGGACAATCAGCACTGCCCATTCTCTGGTCCTCAGCCTGTCAAACTATCCTTG
AAACACCTTAGTCTCCAAATTTCAAGGAGGCTGATTTGAGTAATAATGAAACTCCAGTCTCCCATTCGACTGGCTATGTG
TGAATTAAACTCCATTTCTATTGAAATTTTCTTGTCTTGACATATTGGTTCTATCTGAGCAGCGGACAAATGAACTC--G
GGTTTTTACACATGTGGGCATTTATTGCCATAAAATTCCTTCTTAGACTTGCTTAGGCTACAGCCCAA--------GTAT
GTTATGCTTCCATTTTCATTTGACTCATGATATTTAAATGCTCTTAA---------------------------------
--------------------------------------------------------------------------------
--------------------------------------------------------------------------------
--------------------------------------------------------------------------------
--------------------------------------------------------------------------------
--------------------------------------------------------------------------------
--------------------------------------------------------------------------------
--------------------------------------------------------------------------------
--------------------------------------------------------------------------------
--------------------------------------------------------------------------------
--------------------------------------------------------------------------------
--------------------------------------------------------------------------------
--------------------------------------------------------------------------------
--------------------------------------------------------------------------------
--------------------------------------------------------------------------------
--------------------------------------------------------------------------------
--------------------------------------------------------------------------------
--------------------------------------------------------------------------------
--------------------------------------------------------------------------------
--------------------------------------------------------------------------------
--------------------------------------------------------------------------------
--------------------------------------------------------------------------------
--------------------------------------------------------------------------------
--------------------------------------------------------------------------------
--------------------------------------------------------------------------------
--------------------------------------------------------------------------------
--------------------------------------------------------------------------------
--------------------------------------------------------------------------------
--------------------------------------------------------------------------------
--------------------------------------------------------------------------------
--------------------GGTGGGCATCTGATCCAACA-AGACAGATGCCATGCAAGCC-TAAAAGTGTTTCATGTTA
AAACTTAGAAGAGAAGTTCTTCTTTCTGCTGGGGCTTATATCAGGAGATTTACATTTCTTTCATGTACAGAGAATAAACT
CAATGTAGAGGAATAAGTAGAATTTGGAGAAGGACATTGATCACATTTTTGTTTTTTGTTTTCAAATGGAGTCTCTCTCT
GTTGCCCAGGCTGAAGTGCAGTGGCATGATCTTGGCTCACTGAAGCCTCCATCTCCTGGGTTCAAACAATTCTTGTGCCT
CAGCCTCCCAAGTAGCTGGGATT--ATAGGCATGCATATTTTTGGAAGAGACAAGG------------------------
--------------------------------------------------------------------------------
--------------------------------------------------------------------------------
--------------------------------------------------------------------------------
--------------------------------------------------------------------------------
--------------------------------------------------------------------------------
--------------------------------------------------------------------------------
--------------------------------------------------------------------------------
--------------------------------------------------------------------------------
--------------------------------------------------------------------------------
------------TTTCACTAGATTGGCCAGGCTGGTCTTGAACTCCTAACCTCAAGTGATCTGCTCGCCTTAGCCTCCCA
AAGTGCTGGGATCATAGGCGTGACTCACTGCTCCTGGCCCGTAGACCAGATCTTGATG--ACAAAGTTTGAGCTTCAGAC
TTCAGCTATGACTGAAGTTGTAATTAACCTTTCCAAAATCCTTTTCACCA-----------------------------C
TTAATCCAGTTTTATTTGGTTTATGTTACGTACAACATAAAAGTCCTCATAC-AAAAAACAAAACTATTTGATTGTATGT
GTAGATCCAGCTATTGGCCTTGTTCTTG-AAAAAAAATCTATGTGGAAAAATTACATCTGGCATAAAGGAGACCAAAGAC
ATTGCATCGGTACATATCTGCTCAAACAAATAAAACAATATTTGTGGTGATGAAGAGGAATAGACGA-------------
--------------------CCTCAACCCATTAA----------------------------------------------
--------------------------------------------------------------------------------
--------------------------------------------------------------------------------
--------------------------------------------------------------------------------
-----------------------------------------------------GAATGTAGACTGAACTGTCCTGGTAGA
GACTA--GAGTTCAGAGTAAATATAGTTTTTCGGGCAATAACTGAATAAATATTAGTAATATTATGAACAATGTGGTATA
AGAGAGAAGACAGTATGGTTGGTGTTACGTAATAAAAATTCTTAGTTGTTGGTCCTTGTTGCTCTTTCACTACTGAATGT
ATTAAACTGTATTT----GACAAATCTGAGTAAAAGTAGAGAAATGGAAA-TCAACTGCACATATGTGTGTTTCAGACTT
AAGGAAGTGAATGAAGTCAGTTACAGTTCATGTCTAAAATGAAAAGAGAGCAACCTTAAGAAAAA---------------
--------------------------------------------------------------------------------
--------------------------------------------------------------------------------
--------------------------------------------------------------------------------
-------------------------CTTAGGCCAGGCGTGGTGGCTCATACCTGTAATCCCAGCACTTTGGGAGGCCGAG
ACGGGTGGAT-GCTTGAGGTCAGGAGTTCAAGACCAGCCTGATCAACATGGTGAAACCCCGCTTCTACTACAAA-TAT-A
AAAATTAGCTGGGCAT------TGTGGTGGGCACCTGTAATCCCAGCTACTTGGGAGGCTGAGGCAGGAGAATGGCTTGA
ATCTGGGAGGCAGAGCTTGCAGTCAGCTGAGATTGTGCCACTGCACTCCAGTCTGGGCAACAGAGTGAGACTCCGTCAAA
AAAAAAAAAAAAAAAAAGAAG----------------------------GAAAAGAAAAGAA------------------
-----------ATACCTATAGTTGTTTCATACACTTGTTTGCTTATACCCTCAGCAAAAGCCATATTAACTTCTTGAGCA
CTATTATTTATTCATCTTTGATTTTTCAAAAAGTG-------GCCTGGAAAACAAGTTTATTTATAT--GTTTTGCAGTT
TATTTTTGCATGTGTTTTTGTTTTGTTTT-----GTTTTAGAGATGGGGTCTTACTCTGTCATCCAGGGCGGTGTGCAGT
AGTATGATCCTAGCTCAATGCAGCTTTGATCAAACTTCTGGGCTCAAGCAATTCTCCCACCTCAGCTTCCCAAGTAGCTG
GGACTAGAGGTTCATGCCACCATGGCTGGCTAATTT------GTTTTATTTTTTGTAGAGGTGGGGTCATGCTATGTTGC
CTAGGCTGTATATCTGTTTAATAAATCAAAGAAGC---------------------------------------------
--------------------------------------------------------------------------------
--------------------------------------------------------------------------------
--------------------------------------------------------------------------------
--------------ACTAATTATTTAAATCATTTCATGGAGAGCCATATACATTTGGAGACAAA--CAAATTGCCAGTCT
CTTCTTTTCCTTCTAAACATGTCCCATCCCATCTGCAAA---CAGAAGCCTCTTCCAGAAGGATGAAAGCTGTTTCTACT
TT-AAGAAAACTTGAAAACCTCACATGAGTCTTCTGGGATGATTGCC--TTAAGT-------------------------
--------------------------------------------------------------------------------
--------------------------------------------------------------------------------
--------------------------------------------------------------------------------
----------------------------------------CTT-----TGCTTTTTT-GTCTTTCACACTGGTACCATCT
CCATTCTCAGTACATTA------GGGAGAAACGTAATGAAGCTTTATAAGTGAGGAGAGACTATT-CTTTCTCAATTTAT
GTTTTCTCTCTTCTTTCTAGGGTGTGGATGGCGTCATAAAAAGGTATGTGTGGGAGGACAGAGATAGT--CTTTTTCTGA
AGTGAGGAGAGATTTATAGCCATT--------------------------------------------------------
--------------------------------------------------------------------------------
--------------------------------------------------------------------------------
--------------------------------------------------------------------------------
------------------------CAAA-----TGGGTTCAATTAGAATAAAACATCTCCCAAGGCAGAAAAATTTAGCT
TTTATTTTTAATCAT---------AAATTTCTGGCCATAAATCAGTATTTGAATGTTTGATAACTACTGTTCGTTTGTTG
CTGCTATTAGTTTTTTTTTTTTTTTTTG----------GAGACGGAGTCTTGTTCTGTCACCAGGATGGAGCACAGTGGC
GCGATCTCAGCTCACTGCAACCTCCGCCTCCTGGAATTAAGCGATTCACCTGCCTCAGCCTCCCGAGTAGCTGGGACTAC
CGGTGTATGCCATCATGCCTGGCTAATTCTTTGTATTTT----------------------GTTGGCCA-GGCTGAT---
-ATCTCCTGATCTCATGATCCACCCTCCTCAGCTTCTCAAAGTGCTGGGATTACAAGTGTCAGCCACCTTGCCCAGCCAA
ATGTTCTGTAACTATTAAGAATAGACCAGATGTGGCCAGGTGTGGTGGCTGAAGACTATAATCCCAGCACTTTGGGAGGC
CGAAGCAAGCAGATCACCTGAAGTCAGGAGTTCAAGACCAGCCTGGCCAACCTGGCAAAATCCTGTCACTA-CAAAAAAA
-------TACAAAAATTAGGGGGG-CAGGGTGGCACATGCCTGTAATCCCAGCTACTAGGGAGGCTGAGGCATGAGAATT
GCTTGAATCTGGGAGGCAGAGGTTGCAGTGAGCTAAGACTGCGCCACAGGATTCCAGTCTGGGTGACAAAGTGAGACTCT
ATCTTGGAAAAATCAAATAAAATTAAATTTAAAAATTCTAAAA------------AATAGACCAGATTCTGTGGTAGAAA
TTTTGGATGGTGGAGACTCAGTACGTGGTTCAGCAGTGGTATTACTGATAAGGTGTTGCAGTATCAGACCCCTGCAACAT
CACCATTTTATTACCTAAATCCAGCTCTTTTTCTTTATTTAATAGATACTCGATTTATTTTGAAAGAGCCATGCCTTCTT
TTTCTGCCATATACTCATAATTGTCCATTGGAACAATTCCCTCATATTTATATTTTCCTCCTGGAAAAAAAAAA------
--------------------------------------------------------------------------------
--------------------------------------------------------------------------------
--------------------------------------------------------------------------------
-------------------------------------------------------CCCGTTCCTTCTTTACTTCTATTTA
GATTTCCAAAATCAGATGTTTAATTCTGGAATAATATTTCAAAATAACATTCTGGATAATATGTGGTCACAGTACAAAGA
ATTGATCCACCTCAGTTACATTATTTAGAAGAATATAAAAAGGTGTTATTCTTCTGTCTAAAAT---------CGTACAC
CTACCTGGTGGTATCAAGTTCTTTCTAACCACATAAAATTCAGACCAGTATTAGTTTGATTCACATATAATATCGCATTT
GCCAAGTATTTGTGATTTTTCCCGGAAATCTGAAACCTCAGATATCATCTGAGTACCTCCCTACTGGAAATAGCTTTGAA
GGTCTTAGGCCTCTCCAAACAGGATTCCTCTCTTGATATATCTCAAA--CCCCCAGGAT---------CCAGGTTCTGCA
ACCTCACTTTCTAGCCATCTCCCTGGGAACTCA-TATACATAGTGATGATGTTTCCACTCATTGAATGTTAGGGTTTCTT
TTGCAAGGCACCAAAGTTTTGTTTTGTTTTAAAATGCCCGCCACCGCCCCC--------------------CCTTTTT--
-----------AATGTCCTATGAGTTTAAGAAGGTAGACATG--------------------------------------
--------------------------------------------------------------------------------
--------------------------------------------------------------------------------
--------------------------------------------------------------------------------
-------------------------GAAAGGTTAATTATTTCATTTTGGAAGAAAGAAAGTGTA-CTTCTGAGAGGTTAA
GATCTTCCCACGTTCTCACAGAAAGTAAGTGGGAAGGCAAA--TGAGAACACTTTGTTTGGCTCCAGGGTCAA-------
--------------------------------------------------------------------------------
--------------------------------------------------------------------------------
--------------------------------------------------------------------------------
-------------------------------------------------------------------------GAGTTTG
CACTCTTTCTTCTCAGGATCCCCAAGAAGAGAGTTCAGGTGCATCAGTGGGCTGAAATGATA---AGTCAGGGGTGTTCC
AGGGACACAAGGTCAGAGATTTGGAAGGGAAGGCATTTTTTT-GTTTGTTT-AATTTTTAGGGTTAAGAATGTGACTTTG
CAGAAGCCAAAAACTTTTCTTAATGAAAAAAGGAGAGTATTTCGAGTTCCTGATCTGAAAGGAATGCTACAAGTGTCTAA
AGGTGAGGAGAGCTGGATCAACTGTGGGGTTGTAGAATTCAAGTC------GCTTCAGGGTGCTAAATGGAGAAGAGGGT
GTGGTTTCCAAATATGGATAGAGGGGATAGGGGAAGATGGATACTATCTGCTGCTGATGGGATTATATTTAATGGGAAAT
GGCTAGGTGGCTGTTTCACCCTGTCATTCACCAGTTTATTGCCC---TACCATAGGGCATGCCTGCTCTTTCCCTAATCT
GGAGAGAAAATGAATTTCAGTGCTGACTCCTTTTACGTGTATTAAATATTATGCATTTTTATCATTTCAGAGTTGACAGA
AGTCCAACGCTACTGGGGTAAGGAGAAATCACATTATCATAAGCCACCCAGTGCCTAATCA--------TTATTATTATC
TTTATCTTTTAAGAATTTTATGTT--------------------------------------------------------
--------------------------------------------------------------------------------
--------------------------------------------------------------------------------
--------------------------------------------------------------------------------
--------------------------------------------------------------------------------
--------------------------------------------------------------------------------
--------------------------------------------------------------------------------
--------------------------------------------------------------------------------
--------------------------------------------------------------------------------
--------------------------------------------------------------------------------
-CTTTATTAGATCTCATGTTTTAAGATTTATATTTCTTCTTCCAACACACACATAACCTACCCCTCCT------------
----------TATAACTTTTGAACAAGGTTCCTTCCAGTTTTCTTTCAAGTCTTTATTAAGATTTCTCTCATATAATGTA
ACAACGTTACATTATCTCCCTTACCTGACTTGTTAATTTTTCTACAGCTCATGTGACACTGGTTGCAAGTCACCCTTCAC
GTGCTGTCATTTCTGAAGACGAAAGACAAGTGAGATATCAGGAATGGATACATCAATCATCTGGGAGAGTCAAGTATTTT
TATGGCGTCCT------GGGCTCCCCAAGTATCACATCAGGGAAACATTACTGGGAGGTAGACGTGTCCAATAAAAGTGC
TTGGATCCTGGGGGTATGTGTTAGCTTGAAATGCGCTGCAAATCGGAATGGTCCAGGAGTTGAAAACTATCAACCTAAAA
ATGGCTACTGGGTGATAGGGTTACGGAATGCAGATAACTATAGTGCTTTCCAGGATTCAGTTAAATATAATGATTTCCAG
GATGGTTCCCGCTCTACTACTTATGCTCCTTTGATCGTGCCCCTCTTTATGACTATTTGTCCTAATCGTGTTGGAGTTTT
CCTAGACTATGAGGCTTGCACTGTCTCATTCTTCAATGTCACAAGCAATGGATTTCTCATCTATAAGTTTTCTAACTGTC
ATTTTTCTTATCCTGTATTTCCATATTTCAGTCCTATGACATGTGAATTACCCATGACTCTGTGCTCACCAAGGTCTTGA
ACCGTCTTACACACTCAG-AGCTTCTGTACAGCACCTCTTACCCAGGTGCATCTCATACACCTGAACTCATCTGCACCAT
ATTAATCATCTTTTTCTTGTTGTCTCCCTTCTCCCTTTTTAAAAATTTTAT-----TCAGTAAAATGTAGTAATTGCTTT
GTGTCATATTCTCCCCAATATTTTATTGACATTTGATAGCAATTTTTTT-CATCATTTTCCATACTCTCAAGGAAAACTG
ACCTATACTTCATAAAATGAGACCACTATTTAGGTATTACTTGTGCCAAATATTTACCACCCAATTGTCTCTGACACTGG
CTAAGAAGACAAAGAAAAGCTTTTCAACAGCCTTTCT-----ATATCATCTTGTAGTAGTCGCTCACCAAAGAATGAGTC
CTTAGCCCTGTGTCAGTTTACCCT-------CTTATTCGTCAAAGAGTTAAA----AAATATCATAAAAGGTATACTCT-
AAGTGTAGAGGTTTTGTAACTACAGTGTCTGAGTTTGACTCCTGT------------CTCTCCAT----CAGCAGTGTAA
CTGTGAATAACATACTTAAATTGCTATGCTTCTTTTCTTTTCTTTTCTTTTTTT--------------------GATGGA
GTTTCACTCTTGTCGCCCAGGCTGGAGTGCAAAGGCGCAGTCTCAGCTCACTGCAACCTCTGCCTCCCGGGTTCAAGCAG
TTCTCCTGCCTCAGCCTCCCAAGTAGCTCGGATTACAGGCAGCTGCCACCATACCTGGCTAATTTTGTAGTTTTAGTAGA
GACGGGGTTTCACCC-----TGTTGGTCAGG-TGGTCTCAAACTCCTGACTTCAGGTGATCCACCCGCCTCAGCCTCCCA
AAGTGCCGGGATTAGAGGCGTGAGCCAACATGCCCA----GTCTGTGCTTATTTTCTTAAAATAATTTTTGTATTAAAAA
C---AACTTAAATAAGTTCTAATGTTCTATTGCATAGTAGGGGAAGTAGAGTTAATGAGAACATAT-GCATATATTTTGA
AGACGCTAGAAGAGAAAATTTTGAAGTAGCTAGAAGAGAAAATTTTGAAAATTCTCATCACAAAGAAATAA--CATATTT
GAGGTGATGGA-ATGCTAATTACCTCAATG-TTTGATTATTATGCAATGTATACATGTATCAAAACTTCACACTGTACCA
CATAAATATGTACATTTATTATTTGTCAATTAAAAGCAAAATAAAACAAACAAACTTCATCTAATACTT-GGATCATTGT
GAAAAAATAAATTCCTGAAGTATAAAGCATGT
>Callithrix_jacchus_TRIM5
GCAGCTCCTCTTAGAAAGACTACTTTGAGCAGATCAGG-CCCCTGGATTGGTGAGTGAATCCTAACCATATCTTTCTTCC
CTGGCCTGCCTTCACTCTTCTCCCCGGAATCACCACTTCTGTACTGGTGTCTGAAGGTGTATTGAGTGGTTT-GTGGAGG
GCAAAAGTAGGAAGTCTTTCAGACAAAACTGAATTTGCTTTGGTGAGTTTAACTTACCT-AAAAGCTGTTCTGGGGTGGG
GAAAAGACA--GTTCACAGACTTTCTGCTGCCAGGGTTGACTAATGGGAACAGTGCTGC---------GGGCAGCTTTGA
AAGAAGGGAGAGCTTT----------------------------------------------------------------
--------------------------------------------------------------------------------
--------------------------------------------------------------------------------
--------------------------------------------------------------------------------
----------------------------------AAAGTGAAAGACTTTGTTTCCTGGAAGGCTGGTTATTTTTCCGGGC
TGACTCTCT-----------------------------------------------------------------------
--------------------------------------------------------------------------------
--------------------------------------------------------------------------------
--------------------------------------------------------------------------------
--------------------------------------------------------------------------------
--------------------------------------------------------------------------------
--------------------------------------------------------------------------------
--------------------------------------------------------------------------------
--------------------------------------------------------------------------------
--------------------------------------------------------------------------------
--------------------------------------------------------------------------------
--------------------------------------------------------------------------------
--------------------------------------------------------------------------------
--------------------------------------------------------------------------------
--------------------------------------------------------------------------------
--------------------------------------------------------------------------------
--------------------------------------------------------------------------------
--------------------------------------------------------------------------------
--------------------------------------------------------------------------------
--------------------------------------------------------------------------------
--------------------------------------------------------------------------------
--------------------------------------------------------------------------------
--------------------------------------------------------------------------------
--------------------------------------------------------------------------------
--------------------------------------------------------------------------------
--------------------------------------------------------------------------------
--------------------------------------------------------------------------------
--------------------------------------------------------------------------------
--------------------------------------------------------------------------------
--------------------------------------------------------------------------------
--------------------------------------------------------------------------------
--------------------------------------------------------------------------------
--------------------------------------------------------------------------------
--------------------------------------------------------------------------------
--------------------------------------------------------------------------------
--------------------------------------------------------------------------------
--------------------------------------------------------------------------------
--------------------------------------------------------------------------------
--------------------------------------------------------------------------------
--------------------------------------------------------------------------------
--------------------------------------------------------------------------------
--------------------------------------------------------------------------------
--------------------------------------------------------------------------------
--------------------------------------------------------------------------------
--------------------------------------------------------------------------------
--------------------------------------------------------------------------------
--------------------------------------------------------------------------------
--------------------------------------------------------------------------------
--------------------------------------------------------------------------------
--------------------------------------------------------------------------------
--------------------------------------------------------------------------------
--------------------------------------------------------------------------------
--------------------------------------------------------------------------------
--------------------------------------------------------------------------------
--------------------------------------------------------------------------------
--------------------------------------------------------------------------------
--------------------------------------------------------------------------------
--------------------------------------------------------------------------------
--------------------------------------------------------------------------------
--------------------------------------------------------------------------------
--------------------------------------------------------------------------------
-----------------------------------ATTAAGTAATCCTGTTTACTTCCATTATGAATGTTTCAGGGGCCC
TCTGAACCATCCAAAAAGCCAGGCATTAGAAAAGACAATTTTGAAGCTTGAAGTTTGATTTTGGTACATCTGTTAAATGT
TACAGGTTTAAAACACTTGATGTTATAAAATTGATATAAATTAATTTTTTT-CCAAATGACTCAAAAGGCAAAAGCCTTT
CATTAACCTACACTATGACATGATAATCCTGTTTAAAGCCAAATTTTACCCTTGCATTGATTTATTAAAGTTAGCCCCAA
TTTGTTTAAATGAAATCCTATAGTTCGTTTCATCTAATCTTAACCAATTTGAGCATGAGGTGAAATCTTTACAAACCTTT
TATAACCCTTTTACTAACAGGCAAATTAGTCTCTTCAGAACTCCCTGCTGTGCTTTTATTTCGGTCCTCAATTTATGAAA
AGACCATATAATGCTATTTTGAGTTTAGTTAATGCTTACGCATTTTTTT--GCAAGATTATTTTTTACAATCTTTCTATA
ACTTGCTTAAATTTCTAGCTCTATCTTATCAAATTTGACATCCCTCATCCCAGGGCAAAATTTACATTTCTATGCTTTCT
TCCAATCTTTCACTAAAAAATATATTTTACTGTTTTTATATGCCTTGCACATAAAACTGTTTAGTGATCTCAAATACATG
TTGCACTGTTAACTTTTAGCAACTTTTATTTTTCGTTAAGAAACCT----------------------------------
--------------------------------------------------------------------------------
--------------------------------------------------------------------------------
--------------------------------------------------------------------------------
--------------------------------------------------------------------------------
--------GGTTTGTAAGCAATTTTAATTAGGTACCAGATGTGGTTCCTAGGACCCAGACGGAAGCACAGATAAAGTCTG
ACTTTTCAGCATCTAGCTCCATGTGTCCTAGGACT-----ATTTATAAAGCCGGCAGTACATAACCTTGGAACATTTAGC
AAACCTAGTATCTAAGTTGTATGATTTAGACCACCTGTTTGCATTTTGACAGCACTTGCATTTTACCAATAATCCTTAAG
ACAATTTTTATTTCTT----------------------------------------------------------------
--------------------------------------------------------------------------------
--------------------------------------------------------------------------------
--------------------------------------------------------------------------------
--------------------------------------------------------------------------------
------------------------------AAAATTACATGAACCAAACAAAATTTGATGTATGTGCTTAATTTTCCTTA
AGCCAATTAAT--TAGAGCTCTTTTTATAGACATTGTAAACAACACATATATAGGAATACAGACAGAAGATTCAGCACTT
GTATGATTTTTTT-ATTTGCCAGTTTTTTAATTGGATTACTGGCTTTAGGATAGAGCCCTTGGAGGACTAGGACCAGGTA
GCATGCATATTTAGGGCCTAAAAAGCAGGCACAGCTGAAGGCAAAGTCAGGTCCCTAAAATTAAGAGTGCCACATTATAC
TGGATTTTGGGTCCC-GAAAGGAGGCAGATACTATGGGAGAAGACGGTGTTCTGCTTTTACTGTGTGTTTCATTACAAGG
CAACACAAAGCCAATTGGCTTATTTTGTAATTAGCCCACCCCACTATGGGAGTCTTATTTCTTAGTGGGGGGTGGGGATG
TTTCCATATTTTTTAGGTGGCCGAGAGTATGCTTCTCTGACTTATAACTACTGTTAGACATCCCTTGCAGTGTATTTCCT
ACCTAGTTGTT-GCACACCAAGGCTCTCTCATAATGTGAAGTAATTTGATACCCCCAAAACTTAAAATGGTAGATAACAC
AATGCCTAACAGAACACAGCCTTTGATTTTGAG---AGCCTATGTGCTGTTAAATTTGGGGGGGTTCATGAGGAAGACAG
AGATTTTTTTTTTCCCAAAACGGTGTCTGTGGTGCCGTCTCTGTTTTTTCCCAAGCAGTCCCATGCTACCAGGAGTTATT
TTAGGGCCTCTCATGCATGCATTAAGCATGGTAAGACCAAAAAAAA---------------------------------G
GAGAAAAATAATTCAGTCAACTGACAAGAAGAAGAACC-TTTTTCCAGAAAAACAAGATCCAAGAAGAGAAAAAGGCCTT
TTAAATATACCTATAATTCAGGAGAAAAATAATTCAGTCAACTGAGAAGAAAAAGAACCTTTTTCCAGAAAAACAAGATC
CAAGAAGAGAAAAAGGCCTTTTAAATATACCTATAATTCAGGAGAAAAATAATTCAGTCAACTGAGAAGAAAAAGAAACT
TTTT-CCAGAAAAACAAGATCCAAGAAGAGAAAAAGGCCTTTTAAATATACCTGTAACTTGAATATCCACTTATAATTAG
GCTGAGAGCTCTTTAAGAAAATCCTTTTAAATCTCTTGTTACTTGACTTCAGCCATGCCAAGCAGTTAAGATTTTTGGCT
TTTGAATGTTGTAGAAAATAACCTCACAGGTGAAAGCAACAAACCTTAGTTAGGTTGTGAATGAACCACAGATGAACAAG
GTATTTTCAAAGGAGTGATGGACAGCTTTTGAAACTGTCATTGCAAAATTGTGACTGAGACAGTGGAAGAGATCCAATCC
AAACAACTCCATTTTCTTTCCAGCCCTCAAGCTGTCCTTGCCCATCCCTTGAGTATAGGCTGAACCAACTTTGGGAGAAG
CCTGGTTTACAGTTTATACTCTAAAACAGATATGATAACAGCCCCTTCTTAAGATATACTTCCTTCTTGCCTGGGGACCA
GACCAAGAAACTAGCCATGAGATTAGACACCATGGCTTATGAGTCATGCAGCTGGAGGCTACAAGATTTCGACCCTTCCT
GATCTGCTCTCAAGATCATTGCTAAAGATATTTTGTAAACTCTGCCCTTGATGGATCAGCTGGCACCATTCCAGAAGGGT
GTAAGCTGAAGACTGAAAAACTGGCTTATCTGATTTTGTGGCCTTCACCCAGGAACTGACTTAGCACAAGAAGACAGCCA
TCATTGTAAACCGGTGGAGACTAAAACAAAGTGTTGCCATGTGGTTTCAGGTCACATTCCTGAGGACATGAAACAAGATG
GAGGCCTATAGCCAAGTTTGTTACTGACCATTTTGTTGGGCTGGCTCGAACAACAGGCTTATGAGGGCCTGGGCCTGATC
CTATCGTAAGATACCTCTTCTTTGACAGAACCATACAGAAAGACATGCAAAGCACATCA-ATGGCCTACAGCTTAGGACC
GATCTTAGAAATTCTTTTTCATTAATTGTAACTTTACAGAGAATATAAACAACAATTCTTATTACCCCTTTTACTGGTTT
GCACTGGGAGAGAGAAGTCAAAGACCTGACTGGTAAGAAATGTTTACCCTTTTGCCGGCATATCAGGCTCTGGGTTCCTT
CCCCTGAGCTCAACTCTAAGCCAAGCATTTTAAAGTTGGAAAACTAACTTTTCCAAGTTTGGAATAACATTATTTAAAAG
GCCATTTTAAACGGTGAAAGAAGGAAATACACCATACAAAGGAGTTCCAATTAGGGTTGTCAAGAGATATTGTATTTCTT
CCTGTTGTCAATGGTGTTTCCCCTCTTGATTTGCCTTCCCTATTCCCTCCTTTCCCTTCTGGCCTACTATGAGACATGTT
GCTTATCTCCAAAATTCTTTTCTTTTTTTAGAGCTGCCTGTTTCAGCTCTAGTTAGGGTTTGGCTTAGGAGCAGCGTAAC
ATTCCTCCATGAGAGGTCAAATTCCTGAGTTAAA-TTTTGGAA-GCTTCTCAGTACCCATCAGGGTCGTCAG-AAAATCG
-CCTATATCTTGCTTTACTTGCCTAAAGCCCTGCGACGGGAAAGGAACTCGAAGAGGCCCCAAGTAAGATGGATTTTCAG
ACGGTTTTCCTGAAAATGAATTTTTTAATTTGGAGGAACTATTTTCCCTGGGCCTGCTAGATATGATTTCTAAAAAAGCT
TCCTTGATTTTACAATACTTGAAAAGGTTTGGTAAAAATGCCACACCCTTGTGAAAAGAAAATGAGTTGCATTGTTTAAC
GTTCTGAGGTTAAGGAAGTTCCAGTGTTTCAGAGTGCACTCCAGAAGGGGGCAAGCTGAAGATAACTGATTACCCATTTA
GAAAAAGAAACAAGAATAAAAGCATCCTCGTAGTCTCCTCCCTTTCCGTATGACCCAGAGTGGAGGAGAGGACAGGGAGC
ATCCTTCGAATGCTTCCCCTCCCAGGTTTCCGGATCCCAGCACTATGTTAGATGTGCCCTCCATGGTTATAGGTGTGGTC
CTCCAAGCCATGGAACCAGATGAACTAAGTGGTGGGGCTAACCATGCTTATCCATGCAGCCTTAGTTTGCTTAG-TTGTG
TGATTTCCCTTTGACTTGCTAGAACCTGTGTAAGTTGCCTGGCTCCCTAAAAAACAGATCTCTGGAGAGACTGTCGCCTT
TGGGCAAGGATCCTTTAACAGAGTCAACGTGCTAGACTGCTTCCTATTACAGTCCATGCTAAAGCACTTACCCTTAAAAA
A--AAGTTCTACTTAACTTCCAAACTTAAAATTCCCTTACTAATTGAGTACTATCTTAATCTGAGACAGAATAGGTGCCT
TAAAAGAACATAGAAACGAATAGCCGTTTTCCTACTGATGGGACAATATCGGGACTAAAATCTGGCTGCAGAAGACATCT
TACTCCGATCTGTTAAATGCAGAAACTTCCCGTTTCCAGAAGAGGCCTACAGCCTGATTTCTAACAGTGTAAAAGGAAGT
TCCTGTGTTATGGTAGAAAAAGAGGAAAAAGGTGTGCCTCATGTAGAGGATTTTTATTTCCACTAAGTGACACTGTTGGC
TTAGAAATACTATGTGGTTGCCAGCCTTGTCTTAGT-AAGTAACCTCACCATAGGAGAAAGGGGAAAACTCTGTTCCTAG
AGGCATTTTCCTGATCTTGCCTACCAGGATTACTTTCCTAGGCTGTAAAAATCCCTGCATGTCTCACACACAGAAAGAGC
AAAAGGTTGCAGATAGAGAGGGAAGAAGAGTTTTGCAACAGAATAGTTGAGGATTCTCTGCCAACACTTGGAGTGGGCCG
TCAGAAGCCGCGTGTGGTCCAGGGGCCTTTGAATCATGCCAGGGTGTGCCCTGGCCAGAAATTCTCAGTTACCTCAGAAC
TTTTCCCAGCCTTGCTTGATGGTGAGGTCCCCACATGAAAAGAAGCTAGTTCAAAATGGCCAACATTTCCAGTACCCATG
GGTAGTGGGGGGTTCTCCATATTCCCCTCAGCAAGCCTCACATCTGAGTTTTTAGTATGGCAGCCAAAGCTAAGCGTATG
TACCAGGCTGACAGATGCCCATTGATTTATTTGGTTTCATTTTAATATAGAGGCCAAGAGTGCCTTAGACTAATAGAACA
GATTTTAAGTTTGCTTCCATACTTACCACTCCAATGAAGGCTGTACCTTGGATTCCTGGCCCATGCACCAAAATGATAAA
GCTCTCATGACTGGAGGAACACTAGGGTTCTTGGTCTTG--ACTGGTTGGGTTAATGACATGGACACATGTAGAGTGGTT
TTAAGGAATGAACAGTTTAATCAGCAAGAAAGAAGG---------------------------------AAGGCAGAA--
-GAAAA---CAGCTCCACCGTACAGAGACAGAGGGAGGGGG-ATTTGAACAAAGTGAAAACCTCATGTGC-----AAAAC
G-GCTGTTTATATGAGAAGGCTAGAGGAGGTGGCGTCTGATTTGCATAGGGCTCAGGGAG------TGACCAGGTATGTT
ATTCACATGGCCCA-CGAAAAA-CTGGCCCTCCCACCGTAGCCTTTCAATATGCAAATGTGGAGCGCCACGATGTTTTAA
CACACGTGGGGATACGTGGGGGCGGTCATGTTGCCAGGCACATGTATGGGCAAGGGAGAAGACAATAGGAATCACCATGT
TTGG-ATGGACCCAGTTTCTAATGCCCCACATTTGTGTCTTAAATCTTGCTGGCCTGGCTCTAAGAGCCGGGGCTTTCCT
AGTAGACAAGAAATGTTTCTGGAGCTGCCTTAAAACAAA----AACTTCCCAAGGACCCCTTTTCCTCTCTATCTGCCTA
AAATAATTTCTTAATATTTTCTATAACACTACTAGATGATATTGCTTAACAATTGAATCTCAGTACAATTTTATTTTTCC
CACCTATGTGTGAAAAGTGATGCCTTTCCATATAACATCAGTAATTTGCAGCTATATTATTTTTAGGGGAACAGTTTTAC
CCCAGTTACAGGAGAAGAAAATTTTGTCTATA-TGCATATTGTTTGGATTTTACAAAAAGAGGTTATTGTCTTGTAATGT
TTTTGTTGCTTGTCGTTAGCTGTCACCTCTAGGACATGTTGAGTTTGCATTCTCATGATCCCAGATGTCAGGAGAAGGCT
CACGTGTAAGGTACAATCACCTGATATCTATGGTAGGCAGCTAACCTGAGAGACACCAGGCAGATAATAATTGTGTTCCT
GTCTCAACCTCCCTGACTGCTGTGCAGCCTTTGGGTCACTGCTTAGGTAGTGGTGGGGCTAGCCCCATGTGTGGAAACTC
TGGCTCCTCCGCACATACCTCTTTCTGTGTCTCTTATGGCATCAGTTATTTTCACACTGGCTCCTTGTAATCTCACATTA
AACATAAATTTTACAGCCTCGTGACAGATGGCTATCTCCATT--CCCCCCCTCCCATAGGCTCTT-ATGCATCTCAGTGC
TGGTGCAATTTTTAATGGAATAAAAGATAAATGGAGTCCTCACTTTCAGGTTTGGATTACAACTTGAGTCATAAACAAGG
CTAGACATTATCGTGTGATGCGAACCTCTGATCTTGCCATTTATCAGAGCCTGATACAGGCCAAAGCCACTGCAGCATAA
CACTATCAGCCCTTGGCCCATTTTCAGTATCCA-TACCATCGGATGGATTGCGCCTCCACCCCACTTTCATTCAGCCTTG
TTCTTTATGGCCTTCGTAGATTATGGGAGAAGTGGACAGTTTTTACCGGTCTGAATTTATCTCCATACAGCCTTTATAAC
ATTTCCCTTCCTTTTTCAGAGCAAGGGAGAGACTCATCAGCTGTCTCATAGTGGAGATCTTTCTTTTACCGTGAAACTTT
GACAGGCAGCAACACATCAGTATCTATTAGGGTCTTCTCTTTCCTTGTTTTTAGCCTTACAGCTCTATTTACCTAGAATT
CCTTACAGCCGTGGAACATAGACTGAGGCCACAGGTTCCTTACTGAAACCAGGTCTGTCAGTCAACAACTCTGAGCCAC-
ACTCTGTGATACTTCCCTGACTGAACACCAGCAGCAGTTTCTAATCTGGTTTGCCATTTCACTTATGGGAGATAACAGCC
CTAAACTAGCCACGCTCATGTAGTTCAGC-TGGGGGATGCAGGGCAGGAGAACCATGTGGCACAGCTTCCTCTGGTGAGT
TCTCAGCGAGA-TCCCTAGGGTAGTACAGGAGGCATTAT---CTCCATCATCTGAGTTTTTTAAGAAATGAGACTGGCTA
GATATGTGTGAAA-TGCTGTAGGTTAGATAAGCCTAGTGCTCCAAAGGACTCATTATCTTGTGAAAGCTCATGGGAACAG
TTCTCAGAGACCTAAAA--GAAACGTATCTGGTTTTGTGGTAGAAAATGAG-----------------------------
--------------------------------------------------------------------------------
--------------------------------------------------------------------------------
--------------------------------------------------------------------------------
--------------------------------------------------------------------------------
--------------------------------------------------------------------------------
--------------------------------------------------------------------------------
--------------------------------------------------------------------------------
--------------------------------------------------------------------------------
--------------------------------------------------------------------------------
--------------------------------------------------------------------------------
--------------------------------------------------------------------------------
--------------------------------------------------------------------------------
--------------------------------------------------------------------------------
--------------------------------------------------------------------------------
--------------------------------------------------------------------------------
--------------------------------------------------------------------------------
--------------------------------------------------------------------------------
--------------------------------------------------------------------------------
--------------------------------------------------------------------------------
--------------------------------------------------------------------------------
--------------------------------------------------------------------------------
--------------------------------------------------------------------------------
--------------------------------------------------------------------------------
--------------------------------------------------------------------------------
--------------------------------------------------------------------------------
--------------------------------------------------------------------------------
--------------------------------------------------------------------------------
--------------------------------------------------------------------------------
--------------------------------------------------------------------------------
--------------------------------------------------------------------------------
--------------------------------------------------------------------------------
--------------------------------------------------------------------------------
--------------------------------------------------------------------------------
--------------------------------------------------------------------------------
--------------------------------------------------------------------------------
--------------------------------------------------------------------------------
--------------------------------------------------------------------------------
----------------GCCGTTATCTTCATTTGTCATTGATTAACCAATAGTGTAGCAAAAAGGCCACTGAAAGAGGACC
CTGAATACGGGGTCATCGCAGGTCACCATATTGAAGATAAATAATTTTTGTAAATCACTTCTTATGCCTATTTATACATT
TGAGGAAACACCATCATTCACTCAGTGCTGATAATAAGGGCAATCATTTCAAATGCATGGTGACTAGTGATATTTGTTAT
ACTGCACATAAGGTGGTCAGAGCAGGTATTTTTGATCATATATCATGTAAGGAGAGAATTTAATAAAATCATACTAACAT
CCGGGAAACATTTTATGCTGAGAGAAGAGCAAATGTGAATGTCCTGAGGCATAGGTGCTTTGGTGATTTTAATATTGAGG
ATGTGTTTTGGCATGGAAAAGAAAAGCCAGGAGAGATTATGGGTCACACAAAGATCTTGGTAGAAAAGACCTCAGTTTGT
TTTCTATTCATTGAAAGTAAAGAAAAATGATAACCAATGCACAGATAAGAGCAGAATTTGTCATATGACATGAACTGAGA
GTAAAGCATTTAAGGCAATTATTAAGAGCCTTTATTACTAGGTAACCAAACACCATTTCTTATTT-CTCTCTTTTTTTTT
---GTCCTTAAATATTTTCATTTTGCCCATTTTCTAATTGTACACAATCAATATCCTTTCTATTTAGTCTA--TTTCTTA
CTTAGTCACATTTTAACCTTCCCAATCATTCAGGGATCTGTGAGCAAGAGGAACCTCAGCAGCCAGGACAGGCAAGAGCA
GTGGAGCAGCTACTATGGCTTCCAGAATCCTGGTGAATATAAAGGAGGAGGTAACCTGCCCCATCTGCCTGGAACTCCTG
ACAGAACCTCTGAGCCTAGACTGTGGCCACAGCTTCTGCCAAGCATGCATCACTGCAAACCACAAAGAGTCTACGCTACA
CCAAG---GAGAGAGAAGCTGCCCTTTGTGCCGGATGAGTTACCCGTCTGAGAACTTGCGGCCTAATCGGCATTTGGCCA
ACATAGTGGAGAGGCTCAAAGAGTTCATGCTGAGCCCAGAGGAGGGGCAGAAGGTTGATCACTGTGCACGCCATGGAGAG
AAACTTCTACTCTTCTGTCAGCAGGATGGAAATGTCATTTGCTGGCTTTGTGAGCGGTCTCAAGAACACCGTGGTCACCA
CACATTCCTCGTGGAGGAGGTTGCAGAGAAATACCAAGTAAGAGACTGGGATGGAGGGAGGAGAGAGCAGAAAAT-GGAT
CTGGTGGAAAATTTTCACTTTGCATTTGACTTTAATTGCCTTGTCATC------CTGAGGCCTGGAATTATTTTTTTT--
----------------CATCCTATGCTTAACTGCTGAGGCTTGAAGGACATTTTTTTTTTTTTTTTTTGCATTCCACCCA
ATTACAAGAGAATAATCCAAGAGTATATATTTCTGGCTAGGAATAAATATTTTGTACCTTGGGTTAGATGTGTAGAGAGT
TGGTGTTCAAGAAAAGCTCTTATTACCCCTTTCAGCAGGAGAGTAGCTGGAGTGGGATGAGATGTAAGTTCTTCCCTCGC
TGCAGGATCAGTTTTTTCTTCTAGGACAAAAAGAATCAGTTTACTCATGGTGACAAGATGGG-AGGTCTATTACCTGAGA
TGTAGGGAGCATATTCACCAATGTAAGTTTTCTTCCAAGTCATGGATTCTCATTGCCTTTCTCACCGTTTTTTTAAATTT
GTTTCTTCTGAGATCAACCTGATTTCTTTCATGTTTATACCCTATCCA----GGTGCTGGGAAAGCTCATAGCTTAACTA
TGTTGCGATTCCTTTCTCACAGGAAAAGCTCCAGGTAGCTCTGGAGATGATGAGGCAGAAGCAGCAGGATGCTGAAAAGT
TGGAAGCTGATGTCAGAGAAGAGCAGGCTTCCTGGAAGGTAACATGACATGGTTCCTGAGGGAGTTAGCCAGAAATCTGG
GCAGGACCACGGGAAAGAGCTTTCTTCCTCTTTATTCCCTGACACTTGTTAAGTCCAGAAGTCATCTGATTCATCCTCTT
TATCCTTTCCCTGATGCACTGTGGTGGCTAGGGAGTGAATTTGTCACAATGAACACAGATATCTGTAGGGAGCTATTTAC
ATGAAGGTTCTCTCTGGTGAAGATGGCTAGTGAATCCTGCATTCCATTTCTGTGCTACTTTTTGAGTCCGTGACTCTACT
TGGGGAAGACATTTGGCAGTGGCTCGTGGCTCTGTCCTCAGTGTTCAACTTTTGGCAGGGAGTTTGAGTTTGAGCTGAG-
-AAGTAATATAGGCAGGCATGAGTGTCCTGGATAGCTGTGTGAAAGCAAAGCTACATCCAGGTAACCCGTTTTGACTCAG
GATGAACCT---CAATATATCCATTCAAGATCATTGTTTTAAAATGTCATGAAGGAAAAACAAT--TAGGAAAAATCAAC
TTTCCTAAGACCTACTCTCCTGCTTCTATGTCCCCTCCTTGTGAGAACTCCCCAAAAGAAACAGTTATTTTTCTGGCTAT
CAGCCTCTACCTGGTAAACTAAGTGCCTCTTTCTCCCTTCTCATCTCTGAAGATTCAAATACGAAATGACAAAACCAACA
TCATGGCAGAGTTTAAGCAACTGAGAGACATCCTGGACTGTGAGGAGAGCAAAGAGCTGCAAAACCTGGAGAAGGAGGAG
AAAAACATTCTGAAAAGACTTGTACAGTCTGAAAGTGACATGGTGCTGCAGACCCAGTCCATTAGAGTGCTCATCTCAGA
TCTGGAGCGTCGCCTGCAGGGGTCAGTGATGGAGCTTTTACAGGTAAGAAGTGAAAAGAAGCCTGAGCATTGAGATTAAG
GAAAAGTGAAGGCTATTTCCTTTCCCGTGTTACTGTGCTCTTTCTAACATTAACAACATTCCCTGCAGGATTGCTTTTTT
GAAT------------------------------TAATTGCTGAAGTTACAGGAATAATTGAAGGTAGAAGTAACAAGAG
ATAATCCAATTTTTATTAATTTATCC-AGAGCAGTACAAACATTTGGCATAGTAGAGATGATCAATGAGCTCTAGTGATG
TTTAATAGGTTCCTGTTCGCTATATTCTAGTGTCATGCACTTATCAATGAAGCTTTTCAT--------------------
--------------------------------------------------------------------------------
--------------------------------------------------------------------------------
--------------------------------------------------------------------------------
--------------------------------------------------------------------------------
--------------------------------------------------------------------------------
--------------------------------------------------------------------------------
--------------------------------------------------------------------------------
--------------------------------------------------------------------------------
--------------------------------------------------------------------------------
--------------------------------------------------------------------------------
--------------------------------------------------------------------------------
--------------------------------------------------------------------------------
--------------------------------------------------------------------------------
--------------------------------------------------------------------------------
--------------------------------------------------------------------------------
--------------------------------------------------------------------------------
--------------------------------------------------------------------------------
--------------------------------------------------------------------------------
--------------------------------------------------------------------------------
--------------------------------------------------------------------------------
--------------------------------------------------------------------------------
--------------------------------------------------------------------------------
--------------------------------------------------------------------------------
--------------------------------------------------------------------------------
--------------------------------------------------------------------------------
--------------------------------------------------------------------------------
--------------------------------------------------------------------------------
--------------------------------------------------------------------------------
--------------------------------------------------------------------------------
--------------------------------------------------------------------------------
--------------------------------------------------------------------------------
--------------------------------------------------------------------------------
--------------------------------------------------------------------------------
--------------------------------------------------------------------------------
--------------------------------------------------------------------------------
--------------------------------------------------------------------------------
--------------------------------------------------------------------------------
--------------------------------------------------------------------------------
--------------------------------------------------------------------------------
--------------------------------------------------------CAAATATATGGTTTGCAAATATTT
TCCTCTGACCCACAGGCTACCTTTTCATTTTGTTGATTATTTCCTTTCAGTGCAGAAAATTTCAGTATGATGTAATCCCT
TTTGTCTATTTTCAGTTTTGTTGCCTGGATTTTTGGGTTTATAGCTAAAACAATCATTGGCCTGAATAATGTTTGCAGCT
TTTCCCCTATGTCTTCTTCTAGTAGTTTTACTGTTTCAAGGCTTATATTTAAGTATTTAAGCCACTTTGAGATGATATAA
AAATCATCTCAAAGTGGGAGATAGAATATAAATT-TAGTCTCCTGCATATGGCTATCCAGTTGTTCCAACACAATGTATT
AAAGAGA-------CGGTTCTTTCCTCAATGAGTGTTGATACCACTGTCAAAAACTAGTTGACCCTAAAGGCATGATTTT
TTTTCTAGCTTACTATACTGTTCCATCGGTCTATGTGTCTGTTTCTAATACTAGCACTATACAGTTTGGATAACTGTAGC
TTTGTA-TATATTTTGAAGTCAGGTAGTATGTTGCTTCCAGCATTGTTCTTTTTGTTCAGGATTTTTCTGGTGATTTAAG
GTCTTTTCTGGCCGCACACAAACTTGAGGGTTGTTTT--------------ATCTATTTTTGTAAGAAATGTCAGAATTT
TAATAAGAATTGCATGGAATCTATAGATTACTTTGGGTAACATGTACATTTAAGGATATTACAACTAGACTACAACCATA
TTACAATTCATCATTACAGCAGCCTTAGAGCAGGCTTATAAGAGGTCCTAAAGGGAGTGCTGAACATGGAATAGAAAGAA
CAACAACTGATAC----------CACAGAA-CCCACTAAAGCACATACCATACAGACAATATAAAACAACTACACAATCA
AGTCTACCTAGTAGCCAACTAACAGCATAATGTCACATATCAATACTTACCCAGAATGTAAATGAGCTCAATGCCCTACT
TAAAAGACATAAAGTGGCAAAAGGAATAAAAAGACAAGACTCAA--CTGTCTGCTGTCTTCAAGAGACCCCTTTCACATG
TAATGACACCC----ACAGGCTCAAAGTAAGGGGTTGGAGAAAGACTTACTGGAAATAGAAAACAAAAAGGAGCAGGAGT
AGCTATTCTTATATT-GATAAAACACACTTT--AAACCAATGGCAATTAAGAACAAAAAAGAGAAAACATGATAAAGGGT
ATAATTCAACAAGAAGACTTAATCATCTTAAATATATATGCACCATAGGTGAGAGCACCCAGATTCACAAAACAAGCTCT
TCCTGACCTGAGAAACAACTTAGATGACCTCATAATAATAGTGGGAGACAT-AACATTTAACTGAAAGCATTAGACAGAT
CATCAAGGCAGAAAACTAACAAAAAA-CTCTGGACTTAAACATGATGATTGACCGATTGGATCTAATTGACATCTGTAGA
CTACTTCACCAAACAACCACAGGAAATACATTTTTCT-----GGACCAGAACATATTCTATGATCAACCACATATTTGGT
CATAAAGGAAGTCTCAATATATT----AAAAAAAA---------------------------------------------
--------------------------------------------------------------------------------
--------------------------------------------------------------------------------
--------------------------------------------------------------------------------
--------------------------------------------------CTGAAATCATAACCAAGTATACTCACGAAC
CACAGTGCAATAAAAAATAGAAATCAATATCACGAAGACCTCTCAAAACTACACAAATACATAGAAGTTAAACAACTTGC
TCCTTAATAACTCCTGAGTGAACATTAAAACTAAGGCAGGAATCAAATATAATATTTGAAAACAATAGAAATAAGAATAA
AACTTATAAAAATCTCTGGCATACAGCTAAAACAATGAAGAGGAAACTTTATAGCATGAAGCGCCTTCATTAAAACGTTA
GGAAGATTTCAAATTAATAATCTAACTTTCCACCTAGAAGAATGAGAAAGAAAAGAAAAAACTATTCCTCTAAGCTAGCT
GTAGAAAATAAATAACTGAAATTGGAGAAGAACTGAATGAAATTGAGACACAAAAACCCATACGAAAGGTTAATGAAGTT
AACAGTTGGTTCTTTAAAAGAATAAACAAGATCGATAGACTTCTAGCTAGATTAATAAAGAAAAAATAA----TATTCAT
GTAAGTGCAATCAGAAATGACAAAGATGACATTACATCTTAGCCTGCAAAAAA-GATACTCAGAGACTATTACTGACAAT
CCTGTGAAAACAAGTTAGAAAATCTAAGGAAAATGGATAAACTCCCAGAAACACAAAATTTTCCAAGACTGAATCAGGAG
GAAATTGAACTCCGAACAAACCAATATAAATTTCCAAAATTGAATCAGTAATAACAAACCTATGAACCAAAAAAA-GCCA
TGGACCAAATGGATTCACAACTGAATTCTACCACATATTTAAAAAAATATATTACCAATATTACTGAAAGTATTTCAATA
AATAGAAGAGTAGGGTCTCCTCTCTAACTACTTCTATGGAGCCAGCATCAATCCAATACCAAAACACAGCAGAAGCACAG
TGAAAGAGAAACATCTCAAGCCAATATTCTGATGAACATAAATGAAATAGTCCTTCACAAAATACTAGCAAACTCAATCA
AA-CAGTGCAGCAAAAGTTAAATAGACCTTTTCCTGGCATGCAAGGCTGGTCTGACATACACAAATCAGTAAGTGTGATC
CACAACATAAATAGAATTGAAAGCAAAAGCCATATTATTATTTCAATAGGTGCAGAAATGCTCTCAATAAAATCCAACAT
CCCTTCATAATAAAAGTCCTAAACAGACCAGGCATCAAAGGAACATACCTCAAAATAATAAGAGCCATCTATGACAAATT
CATAGCTAAAATCATACTGAATGGGCAAAACCTGGAAACATTCCCCTTGAGAAATAGATCAAGACAAGGATGTGCACTCT
ACCACTCCTATTCAACATGGTATTGTAAGTCCTAGTCAAAGAAATTATGTAAGCAAAAGAAATAAAAGACATCCAAATAG
AAAAAAAGAAAGAAATCAAATCGTATCTCTTTGATGACAACGTGATTTTATACAAATATATATATATATATTTCAACCCA
TGAACACAATGTTTTTTTCATTTTATCCATGTCTTTTAAAATTTCTTTCATCAATATTTTATAGTGTTCAATGTACAGAT
CTTTCAATTCCTGGGTTAAATTTATTCCTATTTTACTTTATGCCTATTATATATGGGGTATTTTTCTTGATTTCTCATGA
AAAAAAAT-GTTAGTGTATACAAATTCTTTATTTTACATCCTGCCACTCTGTGAACTTATTAGTTCTAAGAGGTTTTTTT
TGTAGTCTTAAAGATTTCTATGGTGAAATCACATTAAGTGCAAACCGTGGCAATTTAACTCCTTTTCCAATTTGGATGTG
TTTTATTTCTGTCACATGTGTGTTTGCTCTGGCAAGAACTTCCAGTACTTAGTCAAATAGGAGTAGTAAGTATGGGCATT
-TTTATGTTTTTCCAGAGCTTAGAAGAAATGCTCTTACCCTCTTTTAAGTGCATTTTGATGTTTTGTTTTATGTTATGTT
ATG-----------------------------------AGGCTATGATGTTAGTATGATGTTAGCTGTGGGTTTGTCATA
TATGGCCTTCATTATGTTGTGTTAATTCCCTTGTATAGCCAATTTTCTGAGAGTTTTTTTTA-ATCATAAAAATATATTT
AACATTGTCAAATACTGTTTCTGCATGAATTGAGATGATCACATGGTTTTTGTCCATTATCCTGTTAA------------
--------------------TTGAACCATCCCGTGCTCCAGAAACAGATCTCACTTTATCATAGTGAATGATTCTTTTAA
TGTGATGTTCAACCTGAGTTACTAGTATTTTGTTGTTTACTTTTCATCTATGTTCTTCAGGTATATTGACTGACATTTAT
TTTTT-CTTTAGTATTCTTGTGTAAATTTGTCATCCTGGATTCATAAAAGTAGTACAAATATTCCCTCTTTGTCAATTTC
TTAGAAGAGTTTTAGAACGATTTTGGTTTGTTTTTCTTTAAATGTTTGGTAGAATTCAGCCATGAAGCCATATCACGTCC
TGGGCTTTTACCTGATGAATTA----CTTTTCATTACTGATCCATTTTTCTTACTAATTGGTGGTCAGCTCACATTTTCT
GTTTCTTTGGGATATAGCCTTGGTAGGTTTAACGTGTCTAGGAATCTCTCTCTTTCTTCCATGTCATCTAATATATTGGT
ATAAAATTTCATATATCAATTTATATAAATTTTTATATATAAAAATTATATATATAAAATATATATTTATATATAAAATA
TATATTTATATATAAAATATATTATATATAAAAATATATAAAATATATTACATATAAAAAACTGTATATATAATATATAT
ATTTTATACATGGTATAAAATTTCATGTATCAATTTATATAAATTTTTATATATTTTAAATGTATTTATAATATATTAAA
ATATATTATATATAAAAAATATATAACATATATATATAAATTATATATAAAAATATATTATATATAAAAATGTGTATATA
TATATTATATATACAGTTTTATAAATATACATATTTTTATATATGAAAATTTTATATATATAAAATTTTATATAAATTGA
TATATAAAATTTTATACCAATATATTAGATATATACATAGTTTAGACTACCAATA-GTAGTCTCTTATG--------CGT
ATCAGTTGTAATGTCTTCTCTTTCATTTCTGGTTTTATTTATTTGAATCTTCTTCCTTTTATTTTTAGTCTAGCTAAAGG
TTTGTTGATTTTATTTATCTTTTCAAAAAACAAATCTTAGTTTTATTGATCTCTTCATTGGTTTTTTTAGTCTATTTCAT
CTGTCTGCTTGATTTTTATTATTTCCTTCCTTTGCGTAACAT-GGCCTTAGCTTCTTCTTCATCTAGGTCCCTGAAGTGT
AGTGTTAGGTTATTTATTGTGGATTTTTTTTTTTTT----CATGTAAAACCACTTTTGCAAAAACTATAAAAATGAGGAA
ATTATGACAGTGAAGGAGATGTGATCTAACAAACCCGTATTCCCTTTATAGCCTCCAAACTGCCCTTAGGCAGTTAACTT
GAGGAGAAATTTAGTTTATAGTTTAAATGATATTAGCCCTTCCCCCAAACTAAACCAC-TTTGTAAGGCTAATGAAAGAC
CACCAAGTTAGGAGGATGAAAGGAGACAATTCAGACCACTCATTATTTCAGAGGTCACAAGATTTGCAGCCTCCTCAGTT
ACTCCTATAGATAGCATCACTATTATAGAACCTACAATTAGCTTTTTGAGATGTAATTTCAGGTTTTCGCATTTCTGATG
ATGAATGGCTCCAGCTGGACCCACCAACAGGCCTCATATCCTTACCCCAAAGTAGAGTCAGGGAACA----CAAAGAGCA
TTTTCCACACCCCTATGATGATACCCTTGGCCAATCAGCACTGCCCATTCTCTGGTCCTCAGCCTGTCAAACTATCCTTG
AAACACCTTAGCCTCCAAATTTCAAGGAGGCTGATTTGAGTAATAGTGAAACTCCAGTCTCCCATTCAATGGGCTCTGTG
TGAATTAAACTCTTTTTCTATTGCAATTTTCTTGTCTTGACACATTGGTTCTATCTGAGCAGCGGACAAATGAACTCTTG
GGTTTTTACACATGTGGGCATTTATTGCTATAAAATTCCTTCTTAGACTTGCTTAGGCTACAGCCCATAAGTTCCGGTAT
GTTGTGCTTCCATTTTCATTTGACTCATGATATTTAAATGCTTTTAA---------------------------------
--------------------------------------------------------------------------------
--------------------------------------------------------------------------------
--------------------------------------------------------------------------------
--------------------------------------------------------------------------------
--------------------------------------------------------------------------------
--------------------------------------------------------------------------------
--------------------------------------------------------------------------------
--------------------------------------------------------------------------------
--------------------------------------------------------------------------------
--------------------------------------------------------------------------------
--------------------------------------------------------------------------------
--------------------------------------------------------------------------------
--------------------------------------------------------------------------------
--------------------------------------------------------------------------------
--------------------------------------------------------------------------------
--------------------------------------------------------------------------------
--------------------------------------------------------------------------------
--------------------------------------------------------------------------------
--------------------------------------------------------------------------------
--------------------------------------------------------------------------------
--------------------------------------------------------------------------------
--------------------------------------------------------------------------------
--------------------------------------------------------------------------------
--------------------------------------------------------------------------------
--------------------------------------------------------------------------------
--------------------------------------------------------------------------------
--------------------------------------------------------------------------------
--------------------------------------------------------------------------------
--------------------------------------------------------------------------------
--------------------GGTGGGCATCTTATCCAACACAGACAGATGCCATGCAAGCC-TAAAAGTGTTTTATGTTA
AAACTTAGAAGAGAGGTTCTCTTTTCTGCTGGGACTTATATCAGGAGATTTACATTTCCTTCATGTACAGAGAATAAACT
CAATGTAGAGGAATAAGTAGAATTTGGAGAAGAACTTTGATCACATTTTTGTTTTTTGTTTTCAGATGGAGTCTCGCTCT
GTTGTCCAGGCTGAAGTGCAGTGGCATGATCTTGGCTCACTGAAACCTCCACCTCCTGGGTTCAAACAATTCTTGTGCCT
CAGCCTCCGGAGTAGCTGGGATT--ATAGGCATGCATATTTTTGGAAGAGACAGGG------------------------
--------------------------------------------------------------------------------
--------------------------------------------------------------------------------
--------------------------------------------------------------------------------
--------------------------------------------------------------------------------
--------------------------------------------------------------------------------
--------------------------------------------------------------------------------
--------------------------------------------------------------------------------
--------------------------------------------------------------------------------
--------------------------------------------------------------------------------
------------TTTCACCAGATTGAACAGGCTGGTCTTGAACTCCTGACCTCAAGTGATTTGCTCGCCTTAGCCTCCCA
AAGTGCTGGGATCACAGACATGAGTCACTGCTCCTGGCCCATAGACCAGATCTTGATG--ACAAGGTTTGAGCTTCAAAC
TTCTGCTATGACTGAAGTTGTAATTAACCTTTCCAAAATCCTTTTCACCA-----------------------------C
TTAATCCAGTTTTCTTTGGTTTATGTTAGGTACAACATAAAAGTCCTCATAC-AAAAAA-AAAACTATTTGATTGTGTGT
GTAGATCCAGCTATTGGCCTTGTTCTTG-AAAAAAAATCTATGTGGAAAAATTACGTCTGGCATAAAGGAGACCAAAGAC
ATTGCATCGGTACATATCTGCTCAAACAAATAAAACAATATTTGTGGTGATAAAGAGGAACAGACAA-------------
--------------------CCTCAACCCATTGA----------------------------------------------
--------------------------------------------------------------------------------
--------------------------------------------------------------------------------
--------------------------------------------------------------------------------
-----------------------------------------------------GAATGCAGACTGAATTGTCCTGGTAGA
GACTA--GAGTTCAGAGTAAATGTAGTTTTTAGGGCAATAACTGAGTAGATATTAGTAATATTATGGACAATGTGGTATA
AGAAAGAAGACAGTATGGTTGGTGTTACATAGTAAAAATTCTTAGTTGTTGGTCCTTGTTGCTCCTTCACTACTGAAAGT
ATTGAACTGTATTTAAGTGACACATCTGAGTAAAATTAGAGAATTGGAAA-TCAACTGCACATATGTGTGT--CAA----
---GAAGTGAATGAAGT------CAGTTCATGTCTAAAATGAAAAGAGAGCAACCTTAAGAAAAA---------------
--------------------------------------------------------------------------------
--------------------------------------------------------------------------------
--------------------------------------------------------------------------------
-------------------------CTTAAGCCAAGCGTGGTGGCTCATGCCTGTAATCCCAGCACTTTGGGAGGCCAAG
ATGGGTGGATCATTTAAAGTCAGGAGTTCAAGACCAGCCTGACCAACATGGTGAAAACCTGCTTCTACTACAAA-TAT-A
AAAATTAGCTGGGCAT------TGTGGTGGGCACCTGTAATCCCAGCTACTTGGGAGGCTGAGGCAAGAGAATGGCTTGA
ACCCGGGAGGCAGAGGTTGCAGTCAGCTGAGATTGTGCCACTGTACTCCAGCCTGGGCAACACAGTGAGACTCCGTCAAA
AAAAAAAGGAAAAGAAAAAAGAA---------------------------------------------------------
-----------ATACCTGTACTTGTTTCACACACCTGCTTGCTTATACCCTCAGCAAAAGCCACATTAACTTCTTGAGCA
ATATTATTCATTCATCTTTGATTTTTCAAAAAGTG-------GCCTGGAGAAGAAGTTTATTTATAT--GTTTTGTTGTT
TATTTTTGTGTGTGTTTTTGTTTTGTTTTGTT-TGTTTTAGAGATGGGGTCTTATTCTGTCACCCAGGGCGACGTGCAGT
AGTATGATCCTAGCTCAATGCAGCTTTGATCAAACTTCTGGGCTCAAGCAATTCTCTCACCTCAGCTTCCGAAGCAGCTG
GAACTAGAGGCTCATGCCACTATGCCTGGCTAATTT------GTTTTATTTTTTGTAGAGGTGGGGTCATGCTATGTTGC
CTAGGCCGTATATCTGTTTAATAAATCAAAGAAGC---------------------------------------------
--------------------------------------------------------------------------------
--------------------------------------------------------------------------------
--------------------------------------------------------------------------------
--------------ACCAACTATTTAAATCATTTCATAGAGAGCCATATACGTTTGGAG----A--CAAATTGTCAGTCT
CTTCTTTTCCTTCTAAACATGTCCCATC-----TGCAGACACCAGATGCCTTTTCCACAAGGATGAAAGCTGTTTCTACT
TTTAAAAAAACTTGAAGACCTTGCACAAGTCTTCTGGGATAATTGCC--TTAAGT-------------------------
--------------------------------------------------------------------------------
--------------------------------------------------------------------------------
--------------------------------------------------------------------------------
----------------------------------------CTT-----TGCTTTTTT-GTCTTTCATACTGGCACCATCT
CCATTCTCAGTACATTAGGGACTGGGAGAAATGTAATGAAGCTTCATAATTGAGGAGAGACTATT-CTTTCTTAATTTAT
GTTTTCTCTCTTCTTCCTAGGGTGTGGATGACGTCATAAAAAGGTATGTGTGGGAGGACAGAGATGAT--CTTTTTCTGA
AGTGAGGAGAGATTTATAGCCATT--------------------------------------------------------
--------------------------------------------------------------------------------
--------------------------------------------------------------------------------
--------------------------------------------------------------------------------
------------------------CAAA-----TGGGTTCAATTAGAATAAAACATCTCCCGAGGCAGAAAAATTTAG-T
TTTTTTTTT-ATCATACATTTCTGAAATTTCTGGTCATAAATCAGTATTTGAATGTTTGATAACTATTGTTCGTTTGTTG
TTTTTGTTAGGTTTTTTTTTTTT---------------GAGACAGAGTCTCGTTCTGTCACCAGGGTGGAGCGCAGTGGC
GCCATCTCAGCTCACTGCAAGCTCCGCCTCCTGGAATCAAGCGATTCACCTGCCTCAGCCTCCCAAATAGCTGGGACTAC
AGGTGTATGCCATCACACCTGGCTAATTTTTTGTGTTTTAGTAGAGATGGGGTTTCACCATGTTGGCCA-AGCTGGTCTC
TATCTCTTGACCTCGTAATCCACCCTGCTTAGCTTCCCAAAGTGCTGGGATTACAAGTGTGAGCCACCTTGCCCAGCCAA
ACGTTCTGTAACTATTAAGAATGGACCAAATTTGGCCAGGCGTGGTGGCTGAAGCCTATAATCCCAGCATTTTGGGAGGC
CGAAGCAGGCAGATCACCTGAAGTCAGGAGTTCAAGACCAGCTTGGCCAACCTGGCAAAATCCCATCTCTA-CAAAAAAA
-------TACAAAAATTAGGGGGGGCATGGTGGCACATGCCTGTAATCCCAGCTACTAGGGAGGCTGAGGCATGAGAATT
GCTTGAATCCGGGAGGCAGAAGTTGCAGTGAGCTAAGAATGCGCCACAGCATTCCAGTCTGGGTGACAAAGTGAGACTCT
GTCTTGGAAAAATCAAATCAAATTAAATTTAAAAATTTTAAA-------------AATAGACCAGATTCTATGGTAGAAA
ATTTGGTTGGTGGAGACTCTGTATGAG--TCAGCAGTGGTATTATGGATAAGGTGTTGCAGTATCAGACCCCTGCATCAT
CGCCATTTTATTACCTACATCCAGCTCTTTTTCTGTATTTAATAGATACTTGATTTATTTTGAAAGAGCCATGTCTTCTT
TTTCTGCCATATACCCATAATTGTCTATTGGGACAATTCCCTCATATTTTTATTTTCCTCCTGGAAAAAAA---------
--------------------------------------------------------------------------------
--------------------------------------------------------------------------------
--------------------------------------------------------------------------------
-------------------------------------------------------CCAGGTCCTTCTTTACTTCTATTTA
GATTTCCAAAATTGGATGTTTATTTCTGGAATAATATTTCAAAATAACATTCTGGATAATATGTGGTCATGGTACAAGGA
ATTGATCCACCTCAGTTGCATTATTTAGAAGAGTATAAAAAGATGTTATTCTTCTGTCTAAAAT---------TGTACAC
CTACCTGGTGGTATCAAGTTCTTTCCAGCCACATAAAATTCAGTTCAGTATTAGTTTGGTTCACACATAACATCTCATTT
GCCAAGTGTTTGTGATTTTTCCCAGAAATCGGAAACCTCAGATGTTATCTGAGTACCTCCCTACTGGAAATAGCTTTGAA
GGGCTTAGGCCTCTCCAAACAGGATTCCTCTCTTGATACGTGTCAAA--CCCCCAGGAT---------CCAGGTTCTGCA
ACTTCACTTTCTAGCCCTCTCCCTGGGAACTAA-TGTACATAGTGATGATGTTTCCACACACTGAATGTTAGAGTTTCTT
TTGTAAGGCACCAAAGTTTTGTTTTGTTTTAAAATCCCCACCCCCACCC----------------------CCTTTTT--
-----------AATTTCCTACGAGTTTAAGAAGGTAGACATG--------------------------------------
--------------------------------------------------------------------------------
--------------------------------------------------------------------------------
--------------------------------------------------------------------------------
-------------------------GAAAGGTTAATTGTTTCATTTTGGAAGAAAGAAAGTGTAATTCTTGAGAGGTTAA
AATCTTCCTACTTTCTCACAGAAAGTAAGTGGGAAGGCAAA--TGAGAACATTTTGTTTGGCTCCAGGGTCAA-------
--------------------------------------------------------------------------------
--------------------------------------------------------------------------------
--------------------------------------------------------------------------------
-------------------------------------------------------------------------GAGTTTG
CACTCTCTTTTCTCAGGATCCCCAAGAAGAGAGTTCAAGTGCATCAATGGGCTGAAATGATAGGAAGTCAGGGGTGTTCC
AGGGACACAAGGTCAGAGATTTGGAAGGGAAGGCATAC-TTT-TTTTGTTT-AATTTTTAGGATTGAGAAAGTGACTTTG
CAGAAGCCAAAAACGTTTCTTAATGAAAAAAGGAGAGTATTTCGAGCTCCTGATCTGAAAGGAATGCTACAAGCATTTAA
AGGTGAGGAGAGCTGGATCAACTGCGGGGTTGAGGAATGCAAGTC------CTGTCAGGGTGCTAAATGGAGAAGAGAGT
GTGGTTTCCAAATATGGATAAAGGGGAC-GGGGAAGACGGATATTATCTGCTGCTGATGGGATTATATTTAATGAGAAAT
GGCTAGGTGGCTGTT-CACCCTGTCATTCACCAGTTTACTGCCC---TACCAAAAGGCATGCCTACTCTTTCCCTAATCT
GGAGAGAAAATGAAGTTCAGTGCTGACTCCTTTTACTTGTTTTCAATATTATGCATTTTTATCGTTTCAGAGCTGACAGA
AGTCCAACGCTACTGGGGTAAGGAAAAATCACATTATTATAAGCCACCCAGTGCCTAATCA--------TTATTATTATC
TTTATCTTTTAAGAATTTTATGTT--------------------------------------------------------
--------------------------------------------------------------------------------
--------------------------------------------------------------------------------
--------------------------------------------------------------------------------
--------------------------------------------------------------------------------
--------------------------------------------------------------------------------
--------------------------------------------------------------------------------
--------------------------------------------------------------------------------
--------------------------------------------------------------------------------
--------------------------------------------------------------------------------
-CTCTATTAGGTCTCATGTTTTACGATTTATATTTCTTCTTCCAACACACACATAACCTACCCCTCCT------------
----------TATAACTTCTGAACAAGCTTCCTTCCAGTTTTCTTTCAAGTCTTTATTAAGATTTCTCTCATATAATGTA
ACAAAGTTACATTATATCCCTTGCCTGACCCGTTAATTTTTCTACAGCTCATGTGACACTGGTTCCAAGTCACCCTTCAT
GTACTGTCATTTCTGAAGATGAGAGACAAGTGAGATATCAGGTTCCGATACATCAACCACTTGTGAAAGTCAAGTATTTT
TATGGTGTCCT------GGGCTCCCTAAGTATCACATCAGGGAAACATTACTGGGAGGTAGACGTGTCCAATAAAAGGGG
TTGGATCCTGGGGGTATGTGGTAGCTTGAAATGCAATGCAAAATGGAATGTTCTAAGACCTGAAAATTATCAACCTAAAA
ATGGCTACTGGGTTATAGGGTTACGGAATACAGATAACTATAGTGCTTTCCAGGATGCAGTTAAGTATAGTGATTTCCAG
GATGGTTCTCGCTCTATTTCTTCTGGTCCTTTGATCGTGCCCCTCTTTATGACTATTTGTCCTAATCGTGTTGGAGTTTT
CCTAGACTATGAGGCTTGCACTGTCTCATTCTTCAATGTCACAAGCAATGGATTTCTCATCTATAAGTTTTCTAACTGTC
ATTTTTCTTATCCTGTATTTCCATATTTCAGTCCTATGACATGTGAATTACCCATGACTCTGTGCTCACCAAGCTCTTGA
ACTGTCTTACACACTCAGCCGCTTCTGTACAGCACCTCTTACCCAGGTGCATCTCATACACCTGAACTTGTTTGCACCAT
ATTAACCATCTTTATTTTGTTGTCTCCCTTCTCCCTTTT-AAAAATTTTAT-----TCAGTAAAATGTAGTAATTGCTTT
GTGTCATATTCTCCCCAATATTTTATTGACATTTGATAGCAATTTTTTTTCATCATTTTCCATACTCCCAAGGGAAACTG
ATCTATACTTCATAAAATGAGACCACTATTTAGGTATTACTTCTGCTAAATATTTACCACCCAATTGCCTCTGACACTGG
CTAAGAACACAAAGAAAAGCTTTTCAACAGCCTTTCTTTGTACTATGATCTTGTAGTAGTTGCTTACCAAAGAATGAGTC
CTTAGCCCTGTGCCAGTTTACACT-------TTTATTCGTCAAAGAGTTAAAGAAAACATATCATAAAAAGTATACTCT-
AAGTGTTGAGGTTTTGTAACTACAGTATCTGAGTTTGACTCCTGT------------CTCTCCAT----CAGCAGTGTAA
CTGCAAATAACATACTTAAATGGCTGTGCTTCTTTT-TTTTCTTT-CTT-CTTCTTTTTTTT------------GATGGA
GTTTCACTCTTGTTTCCCAGGCTGGAGTGCAAAGGCACAATCTCAGCTCACTGCAACCTCTGCCTCCCAGGTTCAAGCAG
TTCTCCTGCCTCAGCCTCCCAAGTGGCTTGGATTACAGGCACCTGCCACCACACCTAGCTAATTTTGTACTTTTAGTAGA
GACAGGGTTTCACCT-----TGTTGGTCAGG-TGGTCTCAAACTCCTGACTTCAGGTGATCCACCCACGTCAGCCTCCCA
AAGTGCTGAGATTAGAGGCCTGAGTCAACATGCCCA----GTCTGAGCTTATTTTCTTAAAATAATTTTTGTATTAAAAA
CTTCACTCTAAATAAGTTCTAATGTTCTATTGTATAATAGGATAAGTAGAGTTAACAAGAACATATTGCATATATTTT--
----------------------GAAGTAGCTAGAAGAGAAAATTTTGAAAATTCTCATCACAAAAAAATGA--CATATTT
GAGATGATGGA-ATGCTAATTACTT---GGGTTTGATTATTATATAATGTATACATGTATCAGAACTTCACACTGTACCA
CATAAATATGTACATTTATTATTTGTCAATTAAAAGCAAAATAAAACAAACAAACTTCATCTAATACTTTGGATCATTGT
GAAGAAATAAATTCTTGAAGTATAAAGCATCT
>Aotus_nancymae_TRIM5
GCAGCTCCTCTTAGAAAGACTCCTTTGAGCAGATCAGG-CCCCTGGATTGGTGAGTGAATCCTAACCCTATCTT----CC
CTGGCCTGCCTTCACTCTTCTCCCCAGAATCACTACTTCTGTACTGGTGTCTGAAGGTGTATTGAGTGGTCT-GTGGAGG
GCAAAAGTAGGAAGTCTTTCAGACAAAACTGAATTTGCTTTAGTGAGTTTAACTTACCT-AAAAGCTGTTCTGGGGTGGG
GAAAAGACACAGTTCACAGATTTCCTGCTGCCAGGGTTGACTAATGGGAACAGAGCTGCCTGGCAAGTGGGCAGCTTTGA
AAGAAGGGAGAGCTTT----------------------------------------------------------------
--------------------------------------------------------------------------------
--------------------------------------------------------------------------------
--------------------------------------------------------------------------------
----------------------------------AAAGTGAAAGGCTTTGTTTCCTGGAAGGCTGGTTATTTTTCTGGGC
TGACTCTCT-----------------------------------------------------------------------
--------------------------------------------------------------------------------
--------------------------------------------------------------------------------
--------------------------------------------------------------------------------
--------------------------------------------------------------------------------
--------------------------------------------------------------------------------
--------------------------------------------------------------------------------
--------------------------------------------------------------------------------
--------------------------------------------------------------------------------
--------------------------------------------------------------------------------
--------------------------------------------------------------------------------
--------------------------------------------------------------------------------
--------------------------------------------------------------------------------
--------------------------------------------------------------------------------
--------------------------------------------------------------------------------
--------------------------------------------------------------------------------
--------------------------------------------------------------------------------
--------------------------------------------------------------------------------
--------------------------------------------------------------------------------
--------------------------------------------------------------------------------
--------------------------------------------------------------------------------
--------------------------------------------------------------------------------
--------------------------------------------------------------------------------
--------------------------------------------------------------------------------
--------------------------------------------------------------------------------
--------------------------------------------------------------------------------
--------------------------------------------------------------------------------
--------------------------------------------------------------------------------
--------------------------------------------------------------------------------
--------------------------------------------------------------------------------
--------------------------------------------------------------------------------
--------------------------------------------------------------------------------
--------------------------------------------------------------------------------
--------------------------------------------------------------------------------
--------------------------------------------------------------------------------
--------------------------------------------------------------------------------
--------------------------------------------------------------------------------
--------------------------------------------------------------------------------
--------------------------------------------------------------------------------
--------------------------------------------------------------------------------
--------------------------------------------------------------------------------
--------------------------------------------------------------------------------
--------------------------------------------------------------------------------
--------------------------------------------------------------------------------
--------------------------------------------------------------------------------
--------------------------------------------------------------------------------
--------------------------------------------------------------------------------
--------------------------------------------------------------------------------
--------------------------------------------------------------------------------
--------------------------------------------------------------------------------
--------------------------------------------------------------------------------
--------------------------------------------------------------------------------
--------------------------------------------------------------------------------
--------------------------------------------------------------------------------
--------------------------------------------------------------------------------
--------------------------------------------------------------------------------
--------------------------------------------------------------------------------
--------------------------------------------------------------------------------
--------------------------------------------------------------------------------
--------------------------------------------------------------------------------
--------------------------------------------------------------------------------
----------------------------------TATTAAGTAATCCTGTTTATTTCTTTTGTGAATGTTTCAGGGGCCC
TCTGAACCATCCAAAAAGCCAGGCATTAGAAAAGACAATTTTGAAGATTGAAGTTTGATTTTGGCACATCTGTTAAATGT
TAGAAGTTTAAAACACTTGATGTTATAAAATTGACATAAATTAATTTTTTTACCAAATGACTCAAAAGGC----------
---------------------------------------CAAATTGTACCCTTGCATTGATTTATTAAAGTTAGCCCCAA
TTTGTTTAAATAAAATCCTATAGATCATTTCATCTAATCTTAACCGATTTGAGCATGAGGTGAAATCTTTACAAACCTTT
TATAACCCTTTCACTAATGGGCAGATTAGTCTCTTCAGAACTCCCTGCTGTGCTTTTATTTCAGTCCTCAATTTATGAAA
AGACTATATAATACCGTTTTGAGTTTAGTTAATGTTTACACATTTTTTT--GCAAGATTATTTTTTACAATCTTTCTATA
ACTTGCTTAAATTTCTAGCTCTATCTTATCAAATTTAATATCCCACATCCCAGGGCAAAATTTACATTTCTATGCTTTCT
TATAATCTTTCACTAAAAAACATATTTTACT-TTTTTATATGCCTGGCATGTAAAACTGTTTAGTGATCTCAAATGCATG
TTGCACTGTTAACTTTTAGCAACTTTTATTTTTCGTTAAGAAACCT----------------------------------
--------------------------------------------------------------------------------
--------------------------------------------------------------------------------
--------------------------------------------------------------------------------
--------------------------------------------------------------------------------
--------AGTTAGTAAGCAATTTTAATTAGGTACGAGGTGTGTTTCCTAGGACCCAGACAGAAGTGCAAATAAAGTCTG
ACTTTTCAGCATCTAGCTCCATGTGTCCTAGGACTTACCTATTTATAAAGCAGGCAGTATATAACCTTGGAACATTTAGC
AAACCTAGTATCTAAGTTGTATGATTTAGACCACCTGTTTGCATTTTGATAGCACTTGCATTTTACCAATAATCCTTAAG
ACAGTTTTTATTTCTT----------------------------------------------------------------
--------------------------------------------------------------------------------
--------------------------------------------------------------------------------
--------------------------------------------------------------------------------
--------------------------------------------------------------------------------
------------------------------AAAGTTACATGAACTAAACAATATTTGACGTGTGTGCTTAATTTTCCTTA
AGCCAATTAATCATAGAGCTCTTTTTATAGACATTGTACACAACACATATATAGGAACACAGACAGAAGATTCAGCACTT
GTAAGATTTTTTT-ATTTGCTAGTTTTTTAATTGGATTACTGGCTTTAGGATGGAGCCCTTGGAGGAACAGGACCAGGTA
GCATGCATATTTAGGGCCCAATAAGCAGGCACAGCTGAAGGCAAAGTCAGGTTCCTAAAATTAAGAGTGCCACTTTATAC
TGGATTTTGGGTCCCCAAAAGGAGGCAGATACTATGGGAGAAGACAGTGTTCTGCTTTTACCGTGTGTTTCATTACAAGG
CAACACAAAGCCCATTGGCTTATTTTGTAATCAGCCCACCCCACTATGGGAGTCTTATTTCTTAGTGGGGGGTGGGGATG
TTTCCATATTTTTTAGGTGGCCAAGAGCATGCTTCTCTGATTCATAACTACTGTTAGGCATCCCTTACAGTGTATTTCCT
ACCTAGTTGTTAACACACCAAAGCTTTCTCATAATGTGAAGCAATTTGATATCCCCAAAACTTAAAATGGTAGATAACAC
AATGCATAACAAAACACAGCCTTTGATTTTGAG--GGAACTATCTGCTTTTAAATTTGGGGG-TTTCATGAGGAAAACAG
AGATTTTTTTTTTCCCAAAAGGGGGTCTGTGGTGC-TGCTCTGTTTTTTCCCAAGCAGTCCCATGCTACCAGAAGTTATT
TTAGGGCCTCTCGTGTATGCATTAAGAGTGGTAAGACCAAAAAAAAAAAAAAAAAAAAAAAATACACACACAAAAAAAAG
GAGAAAAATAATTCAGTCAACTGAGAAGAAAAAGAAA--TTTTTCCAGAAAAACAAGATCCAAGAAGAGGAAAAGCCCTT
TTAAATATACCTATAA----------------------------------------------------------------
--------------------------------------------------------------------------------
---------------------------------------------------------CTTGAATATCCACTTATAATTAG
GCTGAGAGCTCTTTAAGAAAATCCTTTTAAATCTCTTGTTACTTGACTTCAGCCATGCCAAGCAGTTAAGATTTTCGGCT
TTTGAACTTTATAGAAAATAACCTCACAGGTGAAAGCAACAAACCTTAGTTAGGCTGTGAATGAACCATAGATGTACAAG
GTATTTTCAAAGGGGTGATGGACAGCTTTTGAAACTGTCATTGCAAAATTGTGAATGAGACAGTGGAAGAGATCCAATCC
AAACAACTCCATTTTCTCTCCAGCCCCCAAGCTGTCCTTGCCCATCCTTTGAGCATAGGCCAAACCAACTTTGGGAGAAG
CCTGGTTTACAGTTCATACTCTAAAACAAATATGATAACAGCCCCTTCTTAAGATGTGCTTCCTTCTTGCCTGGGGACCA
GACCAAGAAACTAGCCATAAGATTAGAAACCATGGCTTAGGAGTCATGCAGCTGGAAGCTACAAGATTTTGACCCTTCCT
AATCTGCTCTCAAGATCATTGCTTAAGATATTTTGTAAACCCTGCCCTTGATGGATCAGCGGGCACCATTCCAGAAGGCT
GTAAGCTGAAGATTGAAAAACTGGCCTATCTGATTTTGTGGCCCTCACCCAGGAACTGACTTAGCACAAGAAGACAGCCA
TCATTGTAAACTGGTGGAGACTAAAACAAAGTATTGCCACGTGGTTGCAGGTCACGTTCCTGAGCACGTGAAACAAGATG
[truncated: 33,973 more chars]
